# Supplementary material for: Prediction of Protein-Protein Interactions Based on Domain
Source: Comput Math Methods Med. 2019 Aug 21;2019:5238406. doi: 10.1155/2019/5238406 (PMC6720845; doi:10.1155/2019/5238406)
Supplement: Supplementary Materials — Supplementary Table S1: 1040 positive DDI. Supplementary Table S2: 1040 negative DDI. [file 5238406.f1.zip]

Archive with 2 entries (2 files):
- 5238406.f1/Supplementary Table S1.xlsx
- 5238406.f1/Supplementary Table S2.xlsx
