# Supplementary material for: Prediction of Protein-Protein Interactions Based on Domain
Source: Comput Math Methods Med. 2019 Aug 21;2019:5238406. doi: 10.1155/2019/5238406 (PMC6720845; doi:10.1155/2019/5238406)
Supplement: Supplementary Materials — Supplementary Table S1: 1040 positive DDI. Supplementary Table S2: 1040 negative DDI. [file 5238406.f1.zip › 5238406.f1/Supplementary Table S1.xlsx]

## Sheet: Sheet1
protein	domain siss-prot number	domain	Number of amino acids	Molecular weight （unused)	Theoretical PI	Asp+Glu	Arg+Lys	total number of atoms	Ext. coefficient	Ext. coefficient2（unused)	Instability index	Aliphatic index	Grand average of hydropathicity	location	SCORE	protein	domain number	domain	Number of amino acids	Molecular weight （unused)	Theoretical PI	Asp+Glu	Arg+Lys	total number of atoms	Ext. coefficient	Ext. coefficient2（unused)	Instability index	Aliphatic index	Grand average of hydropathicity	location
O00145	PF03372	Exo_endo_phos	293	33946.7	8.79	32	36	4763	60515	60390	41.3	80.17	-0.491	4	152.14	O15357	PF03372	Exo_endo_phos	290	33398.8	6.83	35	34	4666	59150	58900	33.6	81.93	-0.454	9
O00145	PF00017	SH2	81	9357.6	7.99	10	11	1308	11585	11460	39.34	81.85	-0.323	4	2.39	P07948	PF07714	Pkinase Tyr	251	28617.3	6.94	32	32	4047	43110	42860	33.14	91.31	-0.131	2
O00145	PF00017	SH2	81	9357.6	7.99	10	11	1308	11585	11460	39.34	81.85	-0.323	4	1.73	P07948	PF00018	SH3 1	47	5447.29	6.91	8	8	773	13980	0	16.38	74.68	-0.681	4
O00145	PF00017	SH2	81	9357.6	7.99	10	11	1308	11585	11460	39.34	81.85	-0.323	4	2.78	P19174	PF00388	PI-PLC-X	144	16350.8	7.7	15	16	2287	20190	19940	49.06	84.65	-0.327	4
O00145	PF00017	SH2	81	9357.6	7.99	10	11	1308	11585	11460	39.34	81.85	-0.323	4	3.04	P19174	PF00387	PI-PLC-Y	134	15558.1	9.43	14	22	2189	16180	15930	47.53	70.6	-0.613	1
O00145	PF00017	SH2	81	9357.6	7.99	10	11	1308	11585	11460	39.34	81.85	-0.323	4	1.74	P19174	PF00168	C2	106	11892.7	6.12	12	11	1675	10095	9970	36.59	82.74	-0.049	4
O00145	PF00017	SH2	81	9357.6	7.99	10	11	1308	11585	11460	39.34	81.85	-0.323	4	1.73	P19174	PF00018	SH3 1	37	4433.95	5.1	7	6	618	13980	0	35.29	68.65	-0.916	3
O00145	PF00017	SH2	81	9357.6	7.99	10	11	1308	11585	11460	39.34	81.85	-0.323	4	5.21	P22681	PF02262	Cbl_N	125	14848.5	9.46	15	22	2117	13075	12950	31.71	84.96	-0.525	4
O00145	PF00017	SH2	81	9357.6	7.99	10	11	1308	11585	11460	39.34	81.85	-0.323	4	5.21	P22681	PF02761	Cbl_N2	84	9796.25	8.14	9	10	1378	23490	23490	23.32	84.88	-0.079	4
O00145	PF00017	SH2	81	9357.6	7.99	10	11	1308	11585	11460	39.34	81.85	-0.323	4	5.21	P22681	PF02762	Cbl_N3	86	9890.32	8.85	7	9	1387	12950	12950	46.45	80.58	-0.307	4
O00145	PF00017	SH2	81	9357.6	7.99	10	11	1308	11585	11460	39.34	81.85	-0.323	4	4.34	P29353	PF00640	PID	157	17268.9	9	13	18	2425	7825	7450	53.52	87.64	-0.078	4
O00145	PF00017	SH2	81	9357.6	7.99	10	11	1308	11585	11460	39.34	81.85	-0.323	4	2.39	P43405	PF07714	Pkinase_Tyr	256	29440	7.55	32	33	4114	55600	55350	30.88	78.83	-0.389	2
O00145	PF00017	SH2	81	9357.6	7.99	10	11	1308	11585	11460	39.34	81.85	-0.323	4	1.73	P62993	PF00018	SH3 1	47	5438.11	4.85	10	8	760	8480	8480	23.19	72.77	-0.8	2
O00145	PF00017	SH2	81	9357.6	7.99	10	11	1308	11585	11460	39.34	81.85	-0.323	4	2.84	Q06124	PF00102	Y_phosphatase	252	29018.1	7.8	32	33	4054	37150	36900	35.25	78.77	-0.515	4
O00145	PF00017	SH2	81	9357.6	7.99	10	11	1308	11585	11460	39.34	81.85	-0.323	4	2.61	Q13480	PF00169	PH	111	13222.3	8.83	16	20	1860	29700	29450	58.48	85.14	-0.5	9
O00145	PF00017	SH2	81	9357.6	7.99	10	11	1308	11585	11460	39.34	81.85	-0.323	4	1.73	Q96B97	PF00018	SH3 1	49	5722.25	4.45	10	5	786	12490	0	34.06	75.51	-0.765	4
O00560	PF00595	PDZ	73	7756.89	6.74	6	6	1102	0	0	32.88	104.11	0.126	3	127.45	P31431	PF01034	Syndecan	58	6576.93	9.4	6	9	963	4470	0	23.93	121.03	0.359	2
O00560	PF00595	PDZ	73	7756.89	6.74	6	6	1102	0	0	32.88	104.11	0.126	3	20.04	P35240	PF00769	ERM	249	28762.7	5.04	56	43	4069	2980	0	63.55	80.12	-0.91	4
O15357	PF03372	Exo_endo_phos	290	33398.8	6.83	35	34	4666	59150	58900	33.6	81.93	-0.454	9	152.14	O00145	PF03372	Exo_endo_phos	293	33946.7	8.79	32	36	4763	60515	60390	41.3	80.17	-0.491	4
O15357	PF00017	SH2	82	9208.43	6.3	10	9	1294	11460	11460	37.22	97.56	-0.08	4	1.73	O60504	PF00018	SH3 1	48	5528.29	8.12	6	7	777	8480	8480	11.84	79.17	-0.454	3
O15357	PF00536	SAM_1	59	6724.47	4.29	14	5	937	12490	0	64.35	102.54	-0.451	2	2.82	P00519	PF07714	Pkinase Tyr	252	29037.5	5.76	33	28	4067	55600	55350	34.84	83.97	-0.232	4
O15357	PF00017	SH2	82	9208.43	6.3	10	9	1294	11460	11460	37.22	97.56	-0.08	4	2.29	P00519	PF08919	F_actin_bind	106	11510.1	6.77	11	11	1620	3105	2980	39.22	93.02	-0.071	5
O15357	PF00017	SH2	82	9208.43	6.3	10	9	1294	11460	11460	37.22	97.56	-0.08	4	2.39	P00519	PF07714	Pkinase Tyr	252	29037.5	5.76	33	28	4067	55600	55350	34.84	83.97	-0.232	4
O15357	PF00017	SH2	82	9208.43	6.3	10	9	1294	11460	11460	37.22	97.56	-0.08	4	1.73	P00519	PF00018	SH3 1	47	5154.7	5.56	5	4	711	13980	13980	11.34	72.55	-0.502	4
O15357	PF00536	SAM_1	59	6724.47	4.29	14	5	937	12490	0	64.35	102.54	-0.451	2	2.82	P06213	PF07714	Pkinase Tyr	268	30260.9	5.82	34	30	4237	34170	33920	36.38	83.99	-0.208	2
O15357	PF00017	SH2	82	9208.43	6.3	10	9	1294	11460	11460	37.22	97.56	-0.08	4	3.41	P06213	PF00757	Furin-like	162	18083.6	7.77	13	15	2413	20075	18450	56.85	45.68	-0.491	2
O15357	PF00017	SH2	82	9208.43	6.3	10	9	1294	11460	11460	37.22	97.56	-0.08	4	4.21	P06213	PF01030	Recep_L_domain	113	13348.8	7.98	12	13	1915	13075	12950	36.01	124.16	0.303	2
O15357	PF00017	SH2	82	9208.43	6.3	10	9	1294	11460	11460	37.22	97.56	-0.08	4	2.24	P06213	PF17870	Insulin_TMD	48	5510.55	8.01	3	4	801	5960	0	47.48	129.79	0.758	2
O15357	PF00017	SH2	82	9208.43	6.3	10	9	1294	11460	11460	37.22	97.56	-0.08	4	2.39	P06213	PF07714	Pkinase Tyr	268	30260.9	5.82	34	30	4237	34170	33920	36.38	83.99	-0.208	2
O15357	PF00017	SH2	82	9208.43	6.3	10	9	1294	11460	11460	37.22	97.56	-0.08	4	2.84	P18031	PF00102	Y_phosphatase	237	27615.7	6.73	32	31	3868	34170	33920	37.5	81.39	-0.47	2
O15357	PF00017	SH2	82	9208.43	6.3	10	9	1294	11460	11460	37.22	97.56	-0.08	4	2.09	P21333	PF00307	Filamin	95	10452.8	9.03	11	13	1470	9970	0	39.23	63.58	-0.637	5
O15357	PF00017	SH2	82	9208.43	6.3	10	9	1294	11460	11460	37.22	97.56	-0.08	4	5.21	P22681	PF02262	Cbl_N	125	14848.5	9.46	15	22	2117	13075	12950	31.71	84.96	-0.525	4
O15357	PF00017	SH2	82	9208.43	6.3	10	9	1294	11460	11460	37.22	97.56	-0.08	4	5.21	P22681	PF02761	Cbl_N2	84	9796.25	8.14	9	10	1378	23490	23490	23.32	84.88	-0.079	4
O15357	PF00017	SH2	82	9208.43	6.3	10	9	1294	11460	11460	37.22	97.56	-0.08	4	5.21	P22681	PF02762	Cbl_N3	86	9890.32	8.85	7	9	1387	12950	12950	46.45	80.58	-0.307	4
O15357	PF00017	SH2	82	9208.43	6.3	10	9	1294	11460	11460	37.22	97.56	-0.08	4	4.34	P29353	PF00640	PID	157	17268.9	9	13	18	2425	7825	7450	53.52	87.64	-0.078	4
O15357	PF00536	SAM_1	59	6724.47	4.29	14	5	937	12490	0	64.35	102.54	-0.451	2	10.49	P46108	PF07653	SH3_2	57	6453.43	9.36	6	9	918	8480	8480	29.38	90.53	-0.374	1		1
O15357	PF03372	Exo_endo_phos	290	33398.8	6.83	35	34	4666	59150	58900	33.6	81.93	-0.454	9	1.55	P46108	PF07653	SH3_2	57	6453.43	9.36	6	9	918	8480	8480	29.38	90.53	-0.374	1
O15357	PF00017	SH2	82	9208.43	6.3	10	9	1294	11460	11460	37.22	97.56	-0.08	4	2.9	P46108	PF07653	SH3_2	57	6453.43	9.36	6	9	918	8480	8480	29.38	90.53	-0.374	1
O15357	PF00017	SH2	82	9208.43	6.3	10	9	1294	11460	11460	37.22	97.56	-0.08	4	1.73	P46108	PF00018	SH3 1	47	5563.16	4.58	12	8	768	11000	0	61.27	60.21	-1.183	1
O15357	PF00017	SH2	82	9208.43	6.3	10	9	1294	11460	11460	37.22	97.56	-0.08	4	24.78	P56945	PF08824	Serine_rich	155	16272.3	5.76	18	13	2291	5500	5500	49.48	100.26	-0.056	2
O15357	PF00017	SH2	82	9208.43	6.3	10	9	1294	11460	11460	37.22	97.56	-0.08	4	1.73	P56945	PF00018	SH3 1	49	5447.1	4.45	8	4	754	12490	12490	34.24	85.51	-0.394	3
O15357	PF00017	SH2	82	9208.43	6.3	10	9	1294	11460	11460	37.22	97.56	-0.08	4	2.61	Q13480	PF00169	PH	111	13222.3	8.83	16	20	1860	29700	29450	58.48	85.14	-0.5	9
O15357	PF00536	SAM_1	59	6724.47	4.29	14	5	937	12490	0	64.35	102.54	-0.451	2	10.49	Q9BX66	PF07653	SH3_2	54	6435.4	8.62	7	8	914	11460	0	18.5	88.52	-0.585	2
O15357	PF03372	Exo_endo_phos	290	33398.8	6.83	35	34	4666	59150	58900	33.6	81.93	-0.454	9	1.55	Q9BX66	PF07653	SH3_2	54	6435.4	8.62	7	8	914	11460	0	18.5	88.52	-0.585	2
O15357	PF00017	SH2	82	9208.43	6.3	10	9	1294	11460	11460	37.22	97.56	-0.08	4	2.9	Q9BX66	PF07653	SH3_2	54	6435.4	8.62	7	8	914	11460	0	18.5	88.52	-0.585	2
O15357	PF00017	SH2	82	9208.43	6.3	10	9	1294	11460	11460	37.22	97.56	-0.08	4	1.73	Q9BX66	PF00018	SH3 1	48	5616.36	8.49	6	7	787	6990	0	10.56	71.04	-0.625	2
O15530	PF00069	Pkinase	261	30003.8	8.23	35	37	4268	25120	24870	40.52	92.68	-0.184	2	1.76	P12931	PF07714	Pkinase Tyr	250	28537.2	7.01	31	31	4023	44265	43890	41.6	86.96	-0.204	4
O15530	PF00069	Pkinase	261	30003.8	8.23	35	37	4268	25120	24870	40.52	92.68	-0.184	2	1.69	P17252	PF00168	C2	107	12484.4	9.56	14	19	1765	24980	0	30.69	70.09	-0.824	4
O15530	PF00069	Pkinase	261	30003.8	8.23	35	37	4268	25120	24870	40.52	92.68	-0.184	2	2.05	P17252	PF00130	C1_1	53	6193.25	8.82	2	6	841	5875	5500	48.92	40.38	0.134	2
O15530	PF00069	Pkinase	261	30003.8	8.23	35	37	4268	25120	24870	40.52	92.68	-0.184	2	1.76	P17252	PF00433	Pkinase_C	36	4107.5	3.96	6	2	565	1490	0	40.53	65	-0.394	2
O15530	PF00069	Pkinase	261	30003.8	8.23	35	37	4268	25120	24870	40.52	92.68	-0.184	2	1.76	P31749	PF00433	Pkinase_C	46	5463.88	4.02	11	3	729	2980	2980	62.05	31.74	-0.987	1
O15530	PF00069	Pkinase	261	30003.8	8.23	35	37	4268	25120	24870	40.52	92.68	-0.184	2	1.6	P31749	PF00169	PH	103	12397.1	7.99	15	16	1737	26595	26470	33.61	70	-0.795	4
O15530	PF00069	Pkinase	261	30003.8	8.23	35	37	4268	25120	24870	40.52	92.68	-0.184	2	2.05	P35568	PF02174	IRS	103	11591.5	8.01	10	11	1638	12615	12490	38.31	95.53	0.108	4
O15530	PF00069	Pkinase	261	30003.8	8.23	35	37	4268	25120	24870	40.52	92.68	-0.184	2	1.6	P35568	PF00169	PH	108	12525.1	9.55	14	20	1751	18450	18450	66.42	65.19	-0.872	4
O15530	PF00069	Pkinase	261	30003.8	8.23	35	37	4268	25120	24870	40.52	92.68	-0.184	2	6.86	Q13153	PF00786	PBD	59	6708.47	4.63	4	4	933	6990	0	51.85	77.63	-0.436	4
O15530	PF00069	Pkinase	261	30003.8	8.23	35	37	4268	25120	24870	40.52	92.68	-0.184	2	1.76	Q13418	PF07714	Pkinase_Tyr	254	28914.7	8.6	27	30	4068	43220	42970	51.17	85.59	-0.194	5
O15530	PF00069	Pkinase	261	30003.8	8.23	35	37	4268	25120	24870	40.52	92.68	-0.184	2	1.76	Q14289	PF07714	Pkinase_Tyr	255	29581.5	5.82	35	31	4171	51380	50880	52.15	96.24	-0.081	2
O15530	PF00069	Pkinase	261	30003.8	8.23	35	37	4268	25120	24870	40.52	92.68	-0.184	2	1.69	P19174	PF00168	C2	106	11892.7	6.12	12	11	1675	10095	9970	36.59	82.74	-0.049	4
O15530	PF00069	Pkinase	261	30003.8	8.23	35	37	4268	25120	24870	40.52	92.68	-0.184	2	1.76	P06241	PF07714	Pkinase Tyr	250	28475.1	7.79	30	31	4027	42650	42400	40.14	91.68	-0.221	4
O15530	PF00069	Pkinase	261	30003.8	8.23	35	37	4268	25120	24870	40.52	92.68	-0.184	2	1.77	P46108	PF07653	SH3_2	57	6453.43	9.36	6	9	918	8480	8480	29.38	90.53	-0.374	1
O43150	PF00169	PH	92	10712.2	9.16	11	16	1495	14230	13980	38.15	62.5	-0.967	4	7.89	P05556	PF00362	Integrin_beta	245	27247.8	4.91	28	19	3796	23630	23380	40.36	86.69	-0.173	2
O43150	PF00169	PH	92	10712.2	9.16	11	16	1495	14230	13980	38.15	62.5	-0.967	4	7.98	P05556	PF07965	Integrin_B_tail	89	10217.4	4.91	16	10	1378	10470	9970	51.49	43.6	-0.873	2
O43150	PF00169	PH	92	10712.2	9.16	11	16	1495	14230	13980	38.15	62.5	-0.967	4	8.08	P05556	PF08725	Integrin_b_cyt	45	5370.23	9.11	7	9	762	8480	0	17.19	69.33	-0.8	2
O43150	PF00169	PH	92	10712.2	9.16	11	16	1495	14230	13980	38.15	62.5	-0.967	4	13.02	P05556	PF07974	EGF_2	32	3353.81	6.14	3	3	441	375	0	18.91	36.56	-0.338	2
O43150	PF00018	SH3 1	52	5761.24	3.94	12	2	781	12490	12490	27.65	78.65	-0.327	3	1.56	P06241	PF07714	Pkinase Tyr	250	28475.1	7.79	30	31	4027	42650	42400	40.14	91.68	-0.221	4
O43150	PF00169	PH	92	10712.2	9.16	11	16	1495	14230	13980	38.15	62.5	-0.967	4	1.63	P06241	PF07714	Pkinase Tyr	250	28475.1	7.79	30	31	4027	42650	42400	40.14	91.68	-0.221	4
O43150	PF00018	SH3 1	52	5761.24	3.94	12	2	781	12490	12490	27.65	78.65	-0.327	3	1.56	P12931	PF07714	Pkinase Tyr	250	28537.2	7.01	31	31	4023	44265	43890	41.6	86.96	-0.204	4
O43150	PF00169	PH	92	10712.2	9.16	11	16	1495	14230	13980	38.15	62.5	-0.967	4	1.63	P12931	PF07714	Pkinase Tyr	250	28537.2	7.01	31	31	4023	44265	43890	41.6	86.96	-0.204	4
O43150	PF00018	SH3 1	52	5761.24	3.94	12	2	781	12490	12490	27.65	78.65	-0.327	3	1.53	P19174	PF00387	PI-PLC-Y	134	15558.1	9.43	14	22	2189	16180	15930	47.53	70.6	-0.613	1
O43150	PF00169	PH	92	10712.2	9.16	11	16	1495	14230	13980	38.15	62.5	-0.967	4	1.84	P19174	PF00388	PI-PLC-X	144	16350.8	7.7	15	16	2287	20190	19940	49.06	84.65	-0.327	4
O43150	PF00169	PH	92	10712.2	9.16	11	16	1495	14230	13980	38.15	62.5	-0.967	4	1.96	P19174	PF00387	PI-PLC-Y	134	15558.1	9.43	14	22	2189	16180	15930	47.53	70.6	-0.613	1
O43150	PF00169	PH	92	10712.2	9.16	11	16	1495	14230	13980	38.15	62.5	-0.967	4	1.79	P19174	PF00168	C2	106	11892.7	6.12	12	11	1675	10095	9970	36.59	82.74	-0.049	4
O43150	PF00018	SH3 1	52	5761.24	3.94	12	2	781	12490	12490	27.65	78.65	-0.327	3	1.93	P19174	PF00168	C2	106	11892.7	6.12	12	11	1675	10095	9970	36.59	82.74	-0.049	4
O43150	PF00018	SH3 1	52	5761.24	3.94	12	2	781	12490	12490	27.65	78.65	-0.327	3	1.79	P21333	PF00307	CH	108	12579.8	9.69	10	16	1815	12615	12490	40.82	120.93	-0.118	2
O43150	PF00169	PH	92	10712.2	9.16	11	16	1495	14230	13980	38.15	62.5	-0.967	4	2.01	P21333	PF00307	CH	108	12579.8	9.69	10	16	1815	12615	12490	40.82	120.93	-0.118	2
O43150	PF00169	PH	92	10712.2	9.16	11	16	1495	14230	13980	38.15	62.5	-0.967	4	1.77	P46108	PF07653	SH3_2	57	6453.43	9.36	6	9	918	8480	8480	29.38	90.53	-0.374	1
O43150	PF00018	SH3 1	52	5761.24	3.94	12	2	781	12490	12490	27.65	78.65	-0.327	3	2.72	P46108	PF07653	SH3_2	57	6453.43	9.36	6	9	918	8480	8480	29.38	90.53	-0.374	1
O43150	PF00023	Ank	33	3579.16	6.74	4	4	505	1615	1490	60.12	106.67	0.03	3	3.85	P46108	PF07653	SH3_2	57	6453.43	9.36	6	9	918	8480	8480	29.38	90.53	-0.374	1
O43150	PF00018	SH3 1	52	5761.24	3.94	12	2	781	12490	12490	27.65	78.65	-0.327	3	18.95	P49023	PF00412	LIM	56	6445.28	6.44	7	6	869	8730	8480	41.37	41.79	-0.646	4
O43150	PF00169	PH	92	10712.2	9.16	11	16	1495	14230	13980	38.15	62.5	-0.967	4	1.79	Q13480	PF00169	PH	111	13222.3	8.83	16	20	1860	29700	29450	58.48	85.14	-0.5	9
O43150	PF00018	SH3 1	52	5761.24	3.94	12	2	781	12490	12490	27.65	78.65	-0.327	3	1.93	Q13480	PF00169	PH	111	13222.3	8.83	16	20	1860	29700	29450	58.48	85.14	-0.5	9
O43150	PF00023	Ank	33	3579.16	6.74	4	4	505	1615	1490	60.12	106.67	0.03	3	2.35	Q13480	PF00169	PH	111	13222.3	8.83	16	20	1860	29700	29450	58.48	85.14	-0.5	9
O43150	PF00018	SH3 1	52	5761.24	3.94	12	2	781	12490	12490	27.65	78.65	-0.327	3	40.28	Q14247	PF02218	HS1_rep	36	3958.35	6.92	5	5	539	2980	2980	24.24	45.83	-0.931	5
O43150	PF00018	SH3 1	52	5761.24	3.94	12	2	781	12490	12490	27.65	78.65	-0.327	3	1.56	Q14289	PF07714	Pkinase_Tyr	255	29581.5	5.82	35	31	4171	51380	50880	52.15	96.24	-0.081	2
O43150	PF00169	PH	92	10712.2	9.16	11	16	1495	14230	13980	38.15	62.5	-0.967	4	1.63	Q14289	PF07714	Pkinase_Tyr	255	29581.5	5.82	35	31	4171	51380	50880	52.15	96.24	-0.081	2
O43639	PF00018	SH3 1	46	5580.22	8.34	7	8	778	24980	0	34.77	72.17	-1.113	4	1.93	O43150	PF00018	SH3 1	52	5761.24	3.94	12	2	781	12490	12490	27.65	78.65	-0.327	3
O43639	PF00017	SH2	75	8709.66	6.05	11	9	1194	11585	11460	36.95	67.47	-0.663	4	2.61	O43150	PF00018	SH3 1	52	5761.24	3.94	12	2	781	12490	12490	27.65	78.65	-0.327	3
O43639	PF00017	SH2	75	8709.66	6.05	11	9	1194	11585	11460	36.95	67.47	-0.663	4	1.73	O43150	PF00169	PH	92	10712.2	9.16	11	16	1495	14230	13980	38.15	62.5	-0.967	4
O43639	PF00018	SH3 1	46	5580.22	8.34	7	8	778	24980	0	34.77	72.17	-1.113	4	2.29	P00519	PF08919	F_actin_bind	106	11510.1	6.77	11	11	1620	3105	2980	39.22	93.02	-0.071	5
O43639	PF00017	SH2	75	8709.66	6.05	11	9	1194	11585	11460	36.95	67.47	-0.663	4	1.56	P00519	PF08919	F_actin_bind	106	11510.1	6.77	11	11	1620	3105	2980	39.22	93.02	-0.071	5
O43639	PF00017	SH2	75	8709.66	6.05	11	9	1194	11585	11460	36.95	67.47	-0.663	4	2.39	P00519	PF07714	Pkinase Tyr	252	29037.5	5.76	33	28	4067	55600	55350	34.84	83.97	-0.232	4
O43639	PF00017	SH2	75	8709.66	6.05	11	9	1194	11585	11460	36.95	67.47	-0.663	4	1.73	P00519	PF00018	SH3 1	47	5154.7	5.56	5	4	711	13980	13980	11.34	72.55	-0.502	4
O43639	PF00018	SH3 1	46	5580.22	8.34	7	8	778	24980	0	34.77	72.17	-1.113	4	1.84	P35568	PF02174	IRS	103	11591.5	8.01	10	11	1638	12615	12490	38.31	95.53	0.108	4
O43639	PF00017	SH2	75	8709.66	6.05	11	9	1194	11585	11460	36.95	67.47	-0.663	4	13.04	P35568	PF02174	IRS	103	11591.5	8.01	10	11	1638	12615	12490	38.31	95.53	0.108	4
O43639	PF00018	SH3 1	46	5580.22	8.34	7	8	778	24980	0	34.77	72.17	-1.113	4	1.93	P35568	PF00169	PH	108	12525.1	9.55	14	20	1751	18450	18450	66.42	65.19	-0.872	4
O43639	PF00017	SH2	75	8709.66	6.05	11	9	1194	11585	11460	36.95	67.47	-0.663	4	2.61	P35568	PF00169	PH	108	12525.1	9.55	14	20	1751	18450	18450	66.42	65.19	-0.872	4
O43639	PF00018	SH3 1	46	5580.22	8.34	7	8	778	24980	0	34.77	72.17	-1.113	4	18.95	P48059	PF00412	LIM	58	6853.74	4.93	9	5	918	4845	4470	23.22	42.07	-0.414	4
O43639	PF00017	SH2	75	8709.66	6.05	11	9	1194	11585	11460	36.95	67.47	-0.663	4	20.99	P48059	PF00412	LIM	58	6853.74	4.93	9	5	918	4845	4470	23.22	42.07	-0.414	4
O43639	PF00018	SH3 1	46	5580.22	8.34	7	8	778	24980	0	34.77	72.17	-1.113	4	1.91	P50570	PF02212	GED	92	10704.3	5.73	13	10	1508	5960	0	55.8	107.17	-0.248	1
O43639	PF00018	SH3 1	46	5580.22	8.34	7	8	778	24980	0	34.77	72.17	-1.113	4	1.91	P50570	PF01031	Dynamin_M	287	33434.4	9.22	42	49	4758	10555	10430	46.18	92.06	-0.587	5
O43639	PF00018	SH3 1	46	5580.22	8.34	7	8	778	24980	0	34.77	72.17	-1.113	4	1.93	P50570	PF00169	PH	105	12441.2	6.78	17	17	1746	27960	27960	65.31	80.76	-0.606	5
O43639	PF00017	SH2	75	8709.66	6.05	11	9	1194	11585	11460	36.95	67.47	-0.663	4	2.61	P50570	PF00169	PH	105	12441.2	6.78	17	17	1746	27960	27960	65.31	80.76	-0.606	5
O43639	PF00018	SH3 1	46	5580.22	8.34	7	8	778	24980	0	34.77	72.17	-1.113	4	27.54	P56945	PF08824	Serine_rich	155	16272.3	5.76	18	13	2291	5500	5500	49.48	100.26	-0.056	2
O43639	PF00017	SH2	75	8709.66	6.05	11	9	1194	11585	11460	36.95	67.47	-0.663	4	24.78	P56945	PF08824	Serine_rich	155	16272.3	5.76	18	13	2291	5500	5500	49.48	100.26	-0.056	2
O43639	PF00017	SH2	75	8709.66	6.05	11	9	1194	11585	11460	36.95	67.47	-0.663	4	1.73	P56945	PF00018	SH3 1	49	5447.1	4.45	8	4	754	12490	12490	34.24	85.51	-0.394	3
O43639	PF00018	SH3 1	46	5580.22	8.34	7	8	778	24980	0	34.77	72.17	-1.113	4	1.56	Q05397	PF07714	Pkinase_Tyr	255	29112.9	8.73	26	31	4095	42900	42400	57.74	88.31	-0.132	2
O43639	PF00017	SH2	75	8709.66	6.05	11	9	1194	11585	11460	36.95	67.47	-0.663	4	2.39	Q05397	PF07714	Pkinase_Tyr	255	29112.9	8.73	26	31	4095	42900	42400	57.74	88.31	-0.132	2
O43639	PF00018	SH3 1	46	5580.22	8.34	7	8	778	24980	0	34.77	72.17	-1.113	4	3.12	Q07889	PF00617	RasGEF	190	22157.5	6.09	27	24	3159	18575	18450	60.26	104.58	-0.316	1
O43639	PF00018	SH3 1	46	5580.22	8.34	7	8	778	24980	0	34.77	72.17	-1.113	4	3.2	Q07889	PF00618	RasGEF_N	118	14275.4	5.82	19	16	2014	14565	14440	51.21	92.54	-0.388	1
O43639	PF00017	SH2	75	8709.66	6.05	11	9	1194	11585	11460	36.95	67.47	-0.663	4	3.3	Q07889	PF00617	RasGEF	190	22157.5	6.09	27	24	3159	18575	18450	60.26	104.58	-0.316	1
O43639	PF00017	SH2	75	8709.66	6.05	11	9	1194	11585	11460	36.95	67.47	-0.663	4	3.44	Q07889	PF00618	RasGEF_N	118	14275.4	5.82	19	16	2014	14565	14440	51.21	92.54	-0.388	1
O43639	PF00018	SH3 1	46	5580.22	8.34	7	8	778	24980	0	34.77	72.17	-1.113	4	2.25	Q07889	PF00621	RhoGEF	178	20431.3	4.78	31	17	2877	10555	10430	54.63	102.42	-0.19	1
O43639	PF00018	SH3 1	46	5580.22	8.34	7	8	778	24980	0	34.77	72.17	-1.113	4	4.85	Q13153	PF00786	PBD	59	6708.47	4.63	4	4	933	6990	0	51.85	77.63	-0.436	4
O43639	PF00018	SH3 1	46	5580.22	8.34	7	8	778	24980	0	34.77	72.17	-1.113	4	1.81	Q13153	PF00069	Pkinase	252	28371.6	4.83	34	23	3983	30160	29910	39.46	93.61	-0.173	4
O43639	PF00018	SH3 1	46	5580.22	8.34	7	8	778	24980	0	34.77	72.17	-1.113	4	1.56	Q13418	PF07714	Pkinase_Tyr	254	28914.7	8.6	27	30	4068	43220	42970	51.17	85.59	-0.194	5
O43639	PF00017	SH2	75	8709.66	6.05	11	9	1194	11585	11460	36.95	67.47	-0.663	4	2.39	Q13418	PF07714	Pkinase_Tyr	254	28914.7	8.6	27	30	4068	43220	42970	51.17	85.59	-0.194	5
O43639	PF00017	SH2	75	8709.66	6.05	11	9	1194	11585	11460	36.95	67.47	-0.663	4	1.73	Q14185	PF00018	SH3 1	51	5943.67	8.27	6	7	830	14440	0	34.73	74.71	-0.59	4
O43639	PF00018	SH3 1	46	5580.22	8.34	7	8	778	24980	0	34.77	72.17	-1.113	4	2.25	Q15052	PF00621	RhoGEF	175	19889.8	5.17	21	12	2780	7825	7450	49.09	92.46	-0.223	1
O43639	PF00018	SH3 1	46	5580.22	8.34	7	8	778	24980	0	34.77	72.17	-1.113	4	1.79	Q15052	PF00307	CH	112	12408.3	4.44	17	10	1753	7240	6990	41.91	103.48	0.016	3
O43639	PF00017	SH2	75	8709.66	6.05	11	9	1194	11585	11460	36.95	67.47	-0.663	4	3.06	Q15052	PF00621	RhoGEF	175	19889.8	5.17	21	12	2780	7825	7450	49.09	92.46	-0.223	1
O43639	PF00017	SH2	75	8709.66	6.05	11	9	1194	11585	11460	36.95	67.47	-0.663	4	2.09	Q15052	PF00307	CH	112	12408.3	4.44	17	10	1753	7240	6990	41.91	103.48	0.016	3
O43639	PF00018	SH3 1	46	5580.22	8.34	7	8	778	24980	0	34.77	72.17	-1.113	4	3.06	Q15052	PF00169	PH	106	12191	4.75	14	9	1703	10095	9970	36.72	97.36	-0.078	3
O43639	PF00017	SH2	75	8709.66	6.05	11	9	1194	11585	11460	36.95	67.47	-0.663	4	2.09	Q15052	PF00169	PH	106	12191	4.75	14	9	1703	10095	9970	36.72	97.36	-0.078	3
O43639	PF00017	SH2	75	8709.66	6.05	11	9	1194	11585	11460	36.95	67.47	-0.663	4	1.93	Q15052	PF00018	SH3 1	49	5727.23	5.15	7	6	785	19480	19480	21.43	57.55	-0.722	4
O43639	PF00018	SH3 1	46	5580.22	8.34	7	8	778	24980	0	34.77	72.17	-1.113	4	18.95	Q15654	PF00412	LIM	58	6176.04	6.04	6	5	836	4845	4470	27.93	75.52	0.333	4
O43639	PF00017	SH2	75	8709.66	6.05	11	9	1194	11585	11460	36.95	67.47	-0.663	4	20.99	Q15654	PF00412	LIM	58	6176.04	6.04	6	5	836	4845	4470	27.93	75.52	0.333	4
O43639	PF00017	SH2	75	8709.66	6.05	11	9	1194	11585	11460	36.95	67.47	-0.663	4	2.48	Q8IZP0	PF07815	Abi_HHR	78	8855.19	10.34	7	15	1267	8480	0	33.51	83.72	-0.771	4
O43639	PF00017	SH2	75	8709.66	6.05	11	9	1194	11585	11460	36.95	67.47	-0.663	4	1.73	Q8IZP0	PF00018	SH3 1	46	5249.9	4.31	9	5	726	11460	11460	9.09	80.43	-0.315	4
O43639	PF00018	SH3	75	8709.66	6.05	11	9	1194	11585	11460	36.95	67.47	-0.663	4	2.72	Q9BX66	PF07653	SH3_2	54	6435.4	8.62	7	8	914	11460	0	18.5	88.52	-0.585	2
O43639	PF00017	SH2	75	8709.66	6.05	11	9	1194	11585	11460	36.95	67.47	-0.663	4	2.9	Q9BX66	PF07653	SH3_2	54	6435.4	8.62	7	8	914	11460	0	18.5	88.52	-0.585	2
O43639	PF00017	SH2	75	8709.66	6.05	11	9	1194	11585	11460	36.95	67.47	-0.663	4	1.73	Q9BX66	PF00018	SH3 1	48	5616.36	8.49	6	7	787	6990	0	10.56	71.04	-0.625	2
O60331	PF01504	PIP5K	283	32136.9	8.31	35	37	4527	22015	21890	48.94	85.09	-0.363	4	569.47	Q9Y490	PF01608	I_LWEQ	138	14690.7	6.82	19	19	2075	5625	5500	41.45	87.25	-0.334	5
O60331	PF01504	PIP5K	283	32136.9	8.31	35	37	4527	22015	21890	48.94	85.09	-0.363	4	650.82	Q9Y490	PF08913	VBS	125	13322.1	6.87	14	14	1873	4595	4470	44.05	84.4	-0.255	5
O60331	PF01504	PIP5K	283	32136.9	8.31	35	37	4527	22015	21890	48.94	85.09	-0.363	4	650.82	Q9Y490	PF09141	Talin_middle	162	16554.4	4.68	18	11	2319	6990	6990	38.28	88.77	-0.16	3
O60504	PF00018	SH3 1	48	5528.29	8.12	6	7	777	8480	8480	11.84	79.17	-0.454	3	1.56	P00519	PF07714	Pkinase Tyr	252	29037.5	5.76	33	28	4067	55600	55350	34.84	83.97	-0.232	4
O60504	PF00018	SH3 1	48	5528.29	8.12	6	7	777	8480	8480	11.84	79.17	-0.454	3	2.05	P17252	PF00130	C1_1	53	6193.25	8.82	2	6	841	5875	5500	48.92	40.38	0.134	2
O60504	PF00018	SH3 1	48	5528.29	8.12	6	7	777	8480	8480	11.84	79.17	-0.454	3	1.81	P17252	PF00069	Pkinase	259	29537.2	5.41	38	29	4135	29255	28880	31.95	85.02	-0.132	2
O60504	PF02208	Sorb	42	5002.72	9.52	6	8	694	8480	0	70.13	50.95	-1.064	4	53.28	P22681	PF02262	Cbl_N	125	14848.5	9.46	15	22	2117	13075	12950	31.71	84.96	-0.525	4
O60504	PF02208	Sorb	42	5002.72	9.52	6	8	694	8480	0	70.13	50.95	-1.064	4	53.28	P22681	PF02762	Cbl_N3	86	9890.32	8.85	7	9	1387	12950	12950	46.45	80.58	-0.307	4
O60504	PF02208	Sorb	42	5002.72	9.52	6	8	694	8480	0	70.13	50.95	-1.064	4	53.28	P22681	PF02761	Cbl_N2	84	9796.25	8.14	9	10	1378	23490	23490	23.32	84.88	-0.079	4
O60504	PF00018	SH3 1	48	5528.29	8.12	6	7	777	8480	8480	11.84	79.17	-0.454	3	2.07	P22681	PF14447	Prok-RING_4	49	5422.24	4.84	8	5	731	6000	5500	58.85	55.71	-0.353	4
O60504	PF00018	SH3 1	48	5528.29	8.12	6	7	777	8480	8480	11.84	79.17	-0.454	3	2.83	P22681	PF00627	UBA	47	5272.97	4.59	5	3	742	2980	0	103.58	103.83	-0.151	4
O60504	PF00018	SH3 1	48	5528.29	8.12	6	7	777	8480	8480	11.84	79.17	-0.454	3	9.54	P22681	PF02262	Cbl_N	125	14848.5	9.46	15	22	2117	13075	12950	31.71	84.96	-0.525	4
O60504	PF00018	SH3 1	48	5528.29	8.12	6	7	777	8480	8480	11.84	79.17	-0.454	3	9.54	P22681	PF02761	Cbl_N2	84	9796.25	8.14	9	10	1378	23490	23490	23.32	84.88	-0.079	4
O60504	PF00018	SH3 1	48	5528.29	8.12	6	7	777	8480	8480	11.84	79.17	-0.454	3	9.54	P22681	PF02762	Cbl_N3	86	9890.32	8.85	7	9	1387	12950	12950	46.45	80.58	-0.307	4
O60504	PF00018	SH3 1	48	5528.29	8.12	6	7	777	8480	8480	11.84	79.17	-0.454	3	1.81	P28482	PF00069	Pkinase	289	33468.8	8.56	30	34	4739	40715	40340	40.47	104.95	-0.213	1
O60504	PF00018	SH3 1	48	5528.29	8.12	6	7	777	8480	8480	11.84	79.17	-0.454	3	18.95	P49023	PF00412	LIM	56	6445.28	6.44	7	6	869	8730	8480	41.37	41.79	-0.646	4
O60504	PF00018	SH3 1	48	5528.29	8.12	6	7	777	8480	8480	11.84	79.17	-0.454	3	3.12	Q07889	PF00617	RasGEF	190	22157.5	6.09	27	24	3159	18575	18450	60.26	104.58	-0.316	1
O60504	PF00018	SH3 1	48	5528.29	8.12	6	7	777	8480	8480	11.84	79.17	-0.454	3	3.2	Q07889	PF00618	RasGEF_N	118	14275.4	5.82	19	16	2014	14565	14440	51.21	92.54	-0.388	1
O60504	PF00018	SH3 1	48	5528.29	8.12	6	7	777	8480	8480	11.84	79.17	-0.454	3	2.25	Q07889	PF00621	RhoGEF	178	20431.3	4.78	31	17	2877	10555	10430	54.63	102.42	-0.19	1
O60504	PF00018	SH3 1	48	5528.29	8.12	6	7	777	8480	8480	11.84	79.17	-0.454	3	1.93	Q07889	PF00169	PH	119	13731.6	6.1	18	16	1903	15720	15470	21.33	73.03	-0.555	1
O60504	PF00018	SH3 1	48	5528.29	8.12	6	7	777	8480	8480	11.84	79.17	-0.454	3	1.81	P17612	PF00069	Pkinase	255	29715.6	9.49	26	36	4227	39880	39880	31.81	92.86	-0.236	2
O60635	PF00335	Tetraspanin	233	25315.7	5.12	17	13	3567	25035	24410	15.9	102.15	0.673	8	17.66	P05556	PF00362	Integrin_beta	245	27247.8	4.91	28	19	3796	23630	23380	40.36	86.69	-0.173	2
O60635	PF00335	Tetraspanin	233	25315.7	5.12	17	13	3567	25035	24410	15.9	102.15	0.673	8	17.87	P05556	PF07965	Integrin_B_tail	89	10217.4	4.91	16	10	1378	10470	9970	51.49	43.6	-0.873	2
O60635	PF00335	Tetraspanin	233	25315.7	5.12	17	13	3567	25035	24410	15.9	102.15	0.673	8	18.09	P05556	PF08725	Integrin_b_cyt	45	5370.23	9.11	7	9	762	8480	0	17.19	69.33	-0.8	2
O60711	PF00412	LIM	56	6306.15	6.54	5	4	856	8730	8480	66.88	59.29	-0.28	3	150.91	P48059	PF00412	LIM	58	6853.74	4.93	9	5	918	4845	4470	23.22	42.07	-0.414	4
O75815	PF00017	SH2	81	9597.88	8.76	8	10	1335	17085	16960	25.08	80.49	-0.452	4	1.63	O43639	PF00794	PI3K_rbd	76	9071.42	5.11	14	10	1287	3105	2980	60.42	100	-0.279	4
O75815	PF00017	SH2	81	9597.88	8.76	8	10	1335	17085	16960	25.08	80.49	-0.452	4	2.78	O43639	PF02192	PI3K_p85B	120	13986.6	9.07	12	18	1999	17670	17420	48.03	103.08	-0.201	2
O75815	PF00017	SH2	81	9597.88	8.76	8	10	1335	17085	16960	25.08	80.49	-0.452	4	24.78	P56945	PF08824	Serine_rich	155	16272.3	5.76	18	13	2291	5500	5500	49.48	100.26	-0.056	2
O75815	PF00017	SH2	81	9597.88	8.76	8	10	1335	17085	16960	25.08	80.49	-0.452	4	1.73	P56945	PF00018	SH3 1	49	5447.1	4.45	8	4	754	12490	12490	34.24	85.51	-0.394	3
O75815	PF00017	SH2	81	9597.88	8.76	8	10	1335	17085	16960	25.08	80.49	-0.452	4	24.78	Q14511	PF08824	Serine_rich	157	17938.6	5.72	22	18	2522	15720	15470	55.67	96.31	-0.305	2
O75815	PF00017	SH2	81	9597.88	8.76	8	10	1335	17085	16960	25.08	80.49	-0.452	4	1.73	Q14511	PF00018	SH3 9	51	5651.99	3.35	12	1	755	11460	0	27.67	64.9	-0.516	2
O75962	PF07679	I-set	92	9835.01	4.77	12	7	1363	10220	9970	23.21	84.67	-0.103	4	10.46	P10586	PF07679	I-set	102	11153.7	5.15	14	12	1575	7115	6990	43.39	81.18	-0.307	2
O75962	PF00169	PH	112	13041	8.73	16	18	1855	19480	19480	51.76	88.66	-0.476	4	1.53	P10586	PF07679	I-set	102	11153.7	5.15	14	12	1575	7115	6990	43.39	81.18	-0.307	2
O75962	PF00018	SH3 1	52	5846.61	5.48	8	6	813	5625	5500	52.85	84.23	-0.373	4	1.55	P10586	PF00102	Y_phosphatase	232	26607.5	7.77	26	27	3705	40255	39880	36.26	77.28	-0.331	2
O75962	PF00435	Spectrin	107	12502.1	5.8	12	8	1722	15470	15470	60.38	78.5	-0.393	4	1.51	P21333	PF00630	Filamin	94	10355.7	8.97	11	13	1456	9970	0	39.54	64.26	-0.627	5
O75962	PF00169	PH	112	13041	8.73	16	18	1855	19480	19480	51.76	88.66	-0.476	4	2.01	P21333	PF00307	CH	108	12579.8	9.69	10	16	1815	12615	12490	40.82	120.93	-0.118	2
O75962	PF00018	SH3 1	52	5846.61	5.48	8	6	813	5625	5500	52.85	84.23	-0.373	4	1.79	P21333	PF00307	CH	108	12579.8	9.69	10	16	1815	12615	12490	40.82	120.93	-0.118	2
O75962	PF07679	I-set	92	9835.01	4.77	12	7	1363	10220	9970	23.21	84.67	-0.103	4	2.17	Q05397	PF07714	Pkinase_Tyr	255	29112.9	8.73	26	31	4095	42900	42400	57.74	88.31	-0.132	2
O75962	PF00069	Pkinase	255	28521.9	5.57	33	27	4052	27305	26930	39.45	105.1	-0.019	1	1.63	Q05397	PF07714	Pkinase_Tyr	255	29112.9	8.73	26	31	4095	42900	42400	57.74	88.31	-0.132	2
O75962	PF00169	PH	112	13041	8.73	16	18	1855	19480	19480	51.76	88.66	-0.476	4	1.76	Q05397	PF07714	Pkinase_Tyr	255	29112.9	8.73	26	31	4095	42900	42400	57.74	88.31	-0.132	2
O75962	PF00018	SH3 1	52	5846.61	5.48	8	6	813	5625	5500	52.85	84.23	-0.373	4	1.56	Q05397	PF07714	Pkinase_Tyr	255	29112.9	8.73	26	31	4095	42900	42400	57.74	88.31	-0.132	2
P00519	PF00017	SH2	76	8641.5	8.34	7	8	1193	14440	0	48.37	75.66	-0.6	4	1.73	O43639	PF00018	SH3 1	46	5580.22	8.34	7	8	778	24980	0	34.77	72.17	-1.113	4
P00519	PF00017	SH2	76	8641.5	8.34	7	8	1193	14440	0	48.37	75.66	-0.6	4	1.73	O60504	PF00018	SH3 1	48	5528.29	8.12	6	7	777	8480	8480	11.84	79.17	-0.454	3
P00519	PF07714	Pkinase Tyr	252	29037.5	5.76	33	28	4067	55600	55350	34.84	83.97	-0.232	4	2.68	P05556	PF07974	EGF_2	32	3353.81	6.14	3	3	441	375	0	18.91	36.56	-0.338	2
P00519	PF00018	SH3 1	47	5154.7	5.56	5	4	711	13980	13980	11.34	72.55	-0.502	4	1.56	P06241	PF07714	Pkinase Tyr	250	28475.1	7.79	30	31	4027	42650	42400	40.14	91.68	-0.221	4
P00519	PF00017	SH2	76	8641.5	8.34	7	8	1193	14440	0	48.37	75.66	-0.6	4	2.39	P06241	PF07714	Pkinase Tyr	250	28475.1	7.79	30	31	4027	42650	42400	40.14	91.68	-0.221	4
P00519	PF00017	SH2	76	8641.5	8.34	7	8	1193	14440	0	48.37	75.66	-0.6	4	1.73	P06241	PF00018	SH3 1	48	5513.93	4.31	10	4	751	15470	0	40.5	61.04	-0.798	4
P00519	PF00018	SH3 1	47	5154.7	5.56	5	4	711	13980	13980	11.34	72.55	-0.502	4	1.56	P12931	PF07714	Pkinase Tyr	250	28537.2	7.01	31	31	4023	44265	43890	41.6	86.96	-0.204	4
P00519	PF00017	SH2	76	8641.5	8.34	7	8	1193	14440	0	48.37	75.66	-0.6	4	2.39	P12931	PF07714	Pkinase Tyr	250	28537.2	7.01	31	31	4023	44265	43890	41.6	86.96	-0.204	4
P00519	PF00017	SH2	76	8641.5	8.34	7	8	1193	14440	0	48.37	75.66	-0.6	4	1.73	P12931	PF00018	SH3 1	48	5477.99	4.7	7	4	756	15470	0	24.9	73.13	-0.669	2
P00519	PF00018	SH3 1	47	5154.7	5.56	5	4	711	13980	13980	11.34	72.55	-0.502	4	2.05	P15498	PF00130	C1_1	53	6139.05	8.92	4	8	826	3355	2980	60.14	33.21	-0.63	4
P00519	PF00017	SH2	76	8641.5	8.34	7	8	1193	14440	0	48.37	75.66	-0.6	4	2.62	P15498	PF00130	C1_1	53	6139.05	8.92	4	8	826	3355	2980	60.14	33.21	-0.63	4
P00519	PF00018	SH3 1	47	5154.7	5.56	5	4	711	13980	13980	11.34	72.55	-0.502	4	2.25	P15498	PF00621	RhoGEF	173	20375.7	7.9	24	25	2890	9065	8940	34.96	98.09	-0.408	1
P00519	PF00017	SH2	76	8641.5	8.34	7	8	1193	14440	0	48.37	75.66	-0.6	4	3.06	P15498	PF00621	RhoGEF	173	20375.7	7.9	24	25	2890	9065	8940	34.96	98.09	-0.408	1
P00519	PF00018	SH3 1	47	5154.7	5.56	5	4	711	13980	13980	11.34	72.55	-0.502	4	1.79	P15498	PF00307	CH	120	13979.4	7.59	11	12	1974	23865	23490	42.88	107.25	0.141	3
P00519	PF00017	SH2	76	8641.5	8.34	7	8	1193	14440	0	48.37	75.66	-0.6	4	2.09	P15498	PF00307	CH	120	13979.4	7.59	11	12	1974	23865	23490	42.88	107.25	0.141	3
P00519	PF00018	SH3 1	47	5154.7	5.56	5	4	711	13980	13980	11.34	72.55	-0.502	4	1.93	P15498	PF00169	PH	102	12184	8.8	18	20	1711	15470	15470	41.2	73.63	-0.75	1
P00519	PF00017	SH2	76	8641.5	8.34	7	8	1193	14440	0	48.37	75.66	-0.6	4	2.61	P15498	PF00169	PH	102	12184	8.8	18	20	1711	15470	15470	41.2	73.63	-0.75	1
P00519	PF00017	SH2	76	8641.5	8.34	7	8	1193	14440	0	48.37	75.66	-0.6	4	1.73	P15498	PF00018	SH3 1	38	4419.89	4.42	6	3	606	16500	16500	27.68	64.21	-0.703	2
P00519	PF00017	SH2	76	8641.5	8.34	7	8	1193	14440	0	48.37	75.66	-0.6	4	1.74	P17252	PF00168	C2	107	12484.4	9.56	14	19	1765	24980	0	30.69	70.09	-0.824	4
P00519	PF00018	SH3 1	47	5154.7	5.56	5	4	711	13980	13980	11.34	72.55	-0.502	4	2.05	P17252	PF00130	C1_1	53	6193.25	8.82	2	6	841	5875	5500	48.92	40.38	0.134	2
P00519	PF00017	SH2	76	8641.5	8.34	7	8	1193	14440	0	48.37	75.66	-0.6	4	2.62	P17252	PF00130	C1_1	53	6193.25	8.82	2	6	841	5875	5500	48.92	40.38	0.134	2
P00519	PF00018	SH3 1	47	5154.7	5.56	5	4	711	13980	13980	11.34	72.55	-0.502	4	1.81	P17252	PF00069	Pkinase	259	29537.2	5.41	38	29	4135	29255	28880	31.95	85.02	-0.132	2
P00519	PF00018	SH3 1	47	5154.7	5.56	5	4	711	13980	13980	11.34	72.55	-0.502	4	1.55	P18031	PF00102	Y_phosphatase	237	27615.7	6.73	32	31	3868	34170	33920	37.5	81.39	-0.47	2
P00519	PF00017	SH2	76	8641.5	8.34	7	8	1193	14440	0	48.37	75.66	-0.6	4	2.84	P18031	PF00102	Y_phosphatase	237	27615.7	6.73	32	31	3868	34170	33920	37.5	81.39	-0.47	2
P00519	PF00018	SH3 1	47	5154.7	5.56	5	4	711	13980	13980	11.34	72.55	-0.502	4	1.53	P19174	PF00387	PI-PLC-Y	134	15558.1	9.43	14	22	2189	16180	15930	47.53	70.6	-0.613	1
P00519	PF00017	SH2	76	8641.5	8.34	7	8	1193	14440	0	48.37	75.66	-0.6	4	2.78	P19174	PF00388	PI-PLC-X	144	16350.8	7.7	15	16	2287	20190	19940	49.06	84.65	-0.327	4
P00519	PF00017	SH2	76	8641.5	8.34	7	8	1193	14440	0	48.37	75.66	-0.6	4	3.04	P19174	PF00387	PI-PLC-Y	134	15558.1	9.43	14	22	2189	16180	15930	47.53	70.6	-0.613	1
P00519	PF00017	SH2	76	8641.5	8.34	7	8	1193	14440	0	48.37	75.66	-0.6	4	1.74	P19174	PF00168	C2	106	11892.7	6.12	12	11	1675	10095	9970	36.59	82.74	-0.049	4
P00519	PF00017	SH2	76	8641.5	8.34	7	8	1193	14440	0	48.37	75.66	-0.6	4	1.73	P19174	PF00018	SH3 1	37	4433.95	5.1	7	6	618	13980	0	35.29	68.65	-0.916	3
P00519	PF00017	SH2	76	8641.5	8.34	7	8	1193	14440	0	48.37	75.66	-0.6	4	1.74	P20936	PF00168	C2	99	11566.2	6.49	13	12	1624	14105	13980	47.24	84.65	-0.497	4
P00519	PF00018	SH3 1	47	5154.7	5.56	5	4	711	13980	13980	11.34	72.55	-0.502	4	1.93	P20936	PF00169	PH	103	11972.8	8.44	12	14	1684	20065	19940	40.94	81.36	-0.276	4
P00519	PF00017	SH2	76	8641.5	8.34	7	8	1193	14440	0	48.37	75.66	-0.6	4	2.61	P20936	PF00169	PH	103	11972.8	8.44	12	14	1684	20065	19940	40.94	81.36	-0.276	4
P00519	PF00017	SH2	76	8641.5	8.34	7	8	1193	14440	0	48.37	75.66	-0.6	4	1.73	P20936	PF00018	SH3 1	49	5736.51	4.28	10	4	802	12490	0	27.96	97.35	-0.237	4
P00519	PF00018	SH3 1	47	5154.7	5.56	5	4	711	13980	13980	11.34	72.55	-0.502	4	1.79	P21333	PF00307	CH	108	12579.8	9.69	10	16	1815	12615	12490	40.82	120.93	-0.118	2
P00519	PF00017	SH2	76	8641.5	8.34	7	8	1193	14440	0	48.37	75.66	-0.6	4	2.09	P21333	PF00307	CH	108	12579.8	9.69	10	16	1815	12615	12490	40.82	120.93	-0.118	2
P00519	PF00018	SH3 1	47	5154.7	5.56	5	4	711	13980	13980	11.34	72.55	-0.502	4	1.55	P29350	PF00102	Y_phosphatase	245	27781.5	6.09	27	24	3866	45630	45380	35.63	82.73	-0.459	4
P00519	PF00017	SH2	76	8641.5	8.34	7	8	1193	14440	0	48.37	75.66	-0.6	4	2.84	P29350	PF00102	Y_phosphatase	245	27781.5	6.09	27	24	3866	45630	45380	35.63	82.73	-0.459	4
P00519	PF00018	SH3 1	47	5154.7	5.56	5	4	711	13980	13980	11.34	72.55	-0.502	4	3.73	P29353	PF00640	PID	157	17268.9	9	13	18	2425	7825	7450	53.52	87.64	-0.078	4
P00519	PF00017	SH2	76	8641.5	8.34	7	8	1193	14440	0	48.37	75.66	-0.6	4	4.34	P29353	PF00640	PID	157	17268.9	9	13	18	2425	7825	7450	53.52	87.64	-0.078	4
P00519	PF00018	SH3 1	47	5154.7	5.56	5	4	711	13980	13980	11.34	72.55	-0.502	4	1.56	P43405	PF07714	Pkinase_Tyr	256	29440	7.55	32	33	4114	55600	55350	30.88	78.83	-0.389	2
P00519	PF00017	SH2	76	8641.5	8.34	7	8	1193	14440	0	48.37	75.66	-0.6	4	2.39	P43405	PF07714	Pkinase_Tyr	256	29440	7.55	32	33	4114	55600	55350	30.88	78.83	-0.389	2
P00519	PF00018	SH3 1	47	5154.7	5.56	5	4	711	13980	13980	11.34	72.55	-0.502	4	2.72	P46108	PF07653	SH3_2	57	6453.43	9.36	6	9	918	8480	8480	29.38	90.53	-0.374	1
P00519	PF00017	SH2	76	8641.5	8.34	7	8	1193	14440	0	48.37	75.66	-0.6	4	2.9	P46108	PF07653	SH3_2	57	6453.43	9.36	6	9	918	8480	8480	29.38	90.53	-0.374	1
P00519	PF00017	SH2	76	8641.5	8.34	7	8	1193	14440	0	48.37	75.66	-0.6	4	1.73	P46108	PF00018	SH3 1	47	5563.16	4.58	12	8	768	11000	0	61.27	60.21	-1.183	1
P00519	PF00018	SH3 1	47	5154.7	5.56	5	4	711	13980	13980	11.34	72.55	-0.502	4	2.72	P46109	PF07653	SH3_2	56	6306.4	9.65	5	9	902	6990	6990	18.33	88.75	-0.096	1
P00519	PF00017	SH2	76	8641.5	8.34	7	8	1193	14440	0	48.37	75.66	-0.6	4	2.9	P46109	PF07653	SH3_2	56	6306.4	9.65	5	9	902	6990	6990	18.33	88.75	-0.096	1
P00519	PF00017	SH2	76	8641.5	8.34	7	8	1193	14440	0	48.37	75.66	-0.6	4	1.73	P46109	PF00018	SH3 1	47	5459.22	4.85	9	7	769	12490	0	61.21	80.85	-0.651	1
P00519	PF00018	SH3 1	47	5154.7	5.56	5	4	711	13980	13980	11.34	72.55	-0.502	4	18.95	P49023	PF00412	LIM	56	6445.28	6.44	7	6	869	8730	8480	41.37	41.79	-0.646	4
P00519	PF00017	SH2	76	8641.5	8.34	7	8	1193	14440	0	48.37	75.66	-0.6	4	20.99	P49023	PF00412	LIM	56	6445.28	6.44	7	6	869	8730	8480	41.37	41.79	-0.646	4
P00519	PF00018	SH3 1	47	5154.7	5.56	5	4	711	13980	13980	11.34	72.55	-0.502	4	1.91	P50570	PF02212	GED	92	10704.3	5.73	13	10	1508	5960	0	55.8	107.17	-0.248	1
P00519	PF00018	SH3 1	47	5154.7	5.56	5	4	711	13980	13980	11.34	72.55	-0.502	4	1.91	P50570	PF01031	Dynamin_M	287	33434.4	9.22	42	49	4758	10555	10430	46.18	92.06	-0.587	5
P00519	PF00018	SH3 1	47	5154.7	5.56	5	4	711	13980	13980	11.34	72.55	-0.502	4	1.93	P50570	PF00169	PH	105	12441.2	6.78	17	17	1746	27960	27960	65.31	80.76	-0.606	5
P00519	PF00017	SH2	76	8641.5	8.34	7	8	1193	14440	0	48.37	75.66	-0.6	4	2.61	P50570	PF00169	PH	105	12441.2	6.78	17	17	1746	27960	27960	65.31	80.76	-0.606	5
P00519	PF07714	Pkinase Tyr	252	29037.5	5.76	33	28	4067	55600	55350	34.84	83.97	-0.232	4	24.69	P56945	PF08824	Serine_rich	155	16272.3	5.76	18	13	2291	5500	5500	49.48	100.26	-0.056	2
P00519	PF00017	SH2	76	8641.5	8.34	7	8	1193	14440	0	48.37	75.66	-0.6	4	24.78	P56945	PF08824	Serine_rich	155	16272.3	5.76	18	13	2291	5500	5500	49.48	100.26	-0.056	2
P00519	PF00018	SH3 1	47	5154.7	5.56	5	4	711	13980	13980	11.34	72.55	-0.502	4	27.54	P56945	PF08824	Serine_rich	155	16272.3	5.76	18	13	2291	5500	5500	49.48	100.26	-0.056	2
P00519	PF00017	SH2	76	8641.5	8.34	7	8	1193	14440	0	48.37	75.66	-0.6	4	1.73	P56945	PF00018	SH3 1	49	5447.1	4.45	8	4	754	12490	12490	34.24	85.51	-0.394	3
P00519	PF00017	SH2	76	8641.5	8.34	7	8	1193	14440	0	48.37	75.66	-0.6	4	2.75	Q03135	PF01146	Caveolin	134	15521	5.64	15	11	2198	31065	30940	23.41	110.52	0.383	9
P00519	PF00018	SH3 1	47	5154.7	5.56	5	4	711	13980	13980	11.34	72.55	-0.502	4	1.55	Q05209	PF00102	Y_phosphatase	235	27666.7	6.72	30	29	3854	47245	46870	31.03	79.66	-0.411	4
P00519	PF00017	SH2	76	8641.5	8.34	7	8	1193	14440	0	48.37	75.66	-0.6	4	2.84	Q05209	PF00102	Y_phosphatase	235	27666.7	6.72	30	29	3854	47245	46870	31.03	79.66	-0.411	4
P00519	PF00018	SH3 1	47	5154.7	5.56	5	4	711	13980	13980	11.34	72.55	-0.502	4	3.12	Q07889	PF00617	RasGEF	190	22157.5	6.09	27	24	3159	18575	18450	60.26	104.58	-0.316	1
P00519	PF00018	SH3 1	47	5154.7	5.56	5	4	711	13980	13980	11.34	72.55	-0.502	4	3.2	Q07889	PF00618	RasGEF_N	118	14275.4	5.82	19	16	2014	14565	14440	51.21	92.54	-0.388	1
P00519	PF00017	SH2	76	8641.5	8.34	7	8	1193	14440	0	48.37	75.66	-0.6	4	3.3	Q07889	PF00617	RasGEF	190	22157.5	6.09	27	24	3159	18575	18450	60.26	104.58	-0.316	1
P00519	PF00017	SH2	76	8641.5	8.34	7	8	1193	14440	0	48.37	75.66	-0.6	4	3.44	Q07889	PF00618	RasGEF_N	118	14275.4	5.82	19	16	2014	14565	14440	51.21	92.54	-0.388	1
P00519	PF00018	SH3 1	47	5154.7	5.56	5	4	711	13980	13980	11.34	72.55	-0.502	4	2.25	Q07889	PF00621	RhoGEF	178	20431.3	4.78	31	17	2877	10555	10430	54.63	102.42	-0.19	1
P00519	PF00017	SH2	76	8641.5	8.34	7	8	1193	14440	0	48.37	75.66	-0.6	4	3.06	Q07889	PF00621	RhoGEF	178	20431.3	4.78	31	17	2877	10555	10430	54.63	102.42	-0.19	1
P00519	PF00018	SH3 1	47	5154.7	5.56	5	4	711	13980	13980	11.34	72.55	-0.502	4	1.93	Q07889	PF00169	PH	119	13731.6	6.1	18	16	1903	15720	15470	21.33	73.03	-0.555	1
P00519	PF00017	SH2	76	8641.5	8.34	7	8	1193	14440	0	48.37	75.66	-0.6	4	2.61	Q07889	PF00169	PH	119	13731.6	6.1	18	16	1903	15720	15470	21.33	73.03	-0.555	1
P00519	PF00018	SH3 1	47	5154.7	5.56	5	4	711	13980	13980	11.34	72.55	-0.502	4	4.85	Q13153	PF00786	PBD	59	6708.47	4.63	4	4	933	6990	0	51.85	77.63	-0.436	4
P00519	PF00018	SH3 1	47	5154.7	5.56	5	4	711	13980	13980	11.34	72.55	-0.502	4	1.81	Q13153	PF00069	Pkinase	252	28371.6	4.83	34	23	3983	30160	29910	39.46	93.61	-0.173	4
P00519	PF00018	SH3 1	47	5154.7	5.56	5	4	711	13980	13980	11.34	72.55	-0.502	4	3.12	Q13905	PF00617	RasGEF	171	20057.1	5.69	23	20	2842	32555	32430	53.18	101.58	-0.267	4
P00519	PF00018	SH3 1	47	5154.7	5.56	5	4	711	13980	13980	11.34	72.55	-0.502	4	3.2	Q13905	PF00618	RasGEF_N	117	13651	6.8	18	18	1966	6085	5960	36.52	116.5	0.107	5
P00519	PF00017	SH2	76	8641.5	8.34	7	8	1193	14440	0	48.37	75.66	-0.6	4	3.3	Q13905	PF00617	RasGEF	171	20057.1	5.69	23	20	2842	32555	32430	53.18	101.58	-0.267	4
P00519	PF00017	SH2	76	8641.5	8.34	7	8	1193	14440	0	48.37	75.66	-0.6	4	3.44	Q13905	PF00618	RasGEF_N	117	13651	6.8	18	18	1966	6085	5960	36.52	116.5	0.107	5
P00519	PF00018	SH3 1	47	5154.7	5.56	5	4	711	13980	13980	11.34	72.55	-0.502	4	1.56	Q14289	PF07714	Pkinase_Tyr	255	29581.5	5.82	35	31	4171	51380	50880	52.15	96.24	-0.081	2
P00519	PF00017	SH2	76	8641.5	8.34	7	8	1193	14440	0	48.37	75.66	-0.6	4	2.39	Q14289	PF07714	Pkinase_Tyr	255	29581.5	5.82	35	31	4171	51380	50880	52.15	96.24	-0.081	2
P00519	PF00018	SH3 1	47	5154.7	5.56	5	4	711	13980	13980	11.34	72.55	-0.502	4	18.95	Q14847	PF00412	LIM	57	6781.98	9.16	4	11	929	13325	12950	45.33	35.96	-0.837	1
P00519	PF00017	SH2	76	8641.5	8.34	7	8	1193	14440	0	48.37	75.66	-0.6	4	20.99	Q14847	PF00412	LIM	57	6781.98	9.16	4	11	929	13325	12950	45.33	35.96	-0.837	1
P00519	PF00017	SH2	76	8641.5	8.34	7	8	1193	14440	0	48.37	75.66	-0.6	4	1.73	Q14847	PF00018	SH3 9	51	5651.99	3.35	12	1	755	11460	0	27.67	64.9	-0.516	2
P00519	PF00018	SH3 1	47	5154.7	5.56	5	4	711	13980	13980	11.34	72.55	-0.502	4	2.56	Q8N8S7	PF00568	WH1	108	12124.7	9.51	7	12	1674	17085	16960	35	66.85	-0.409	1
P00519	PF00017	SH2	76	8641.5	8.34	7	8	1193	14440	0	48.37	75.66	-0.6	4	1.73	Q96EX0	PF00018	SH3 1	46	5414.17	9.11	6	8	765	9970	0	-4.04	74.13	-0.676	2
P00519	PF00018	SH3 1	47	5154.7	5.56	5	4	711	13980	13980	11.34	72.55	-0.502	4	2.72	Q9BX66	PF07653	SH3_2	54	6435.4	8.62	7	8	914	11460	0	18.5	88.52	-0.585	2
P00519	PF00017	SH2	76	8641.5	8.34	7	8	1193	14440	0	48.37	75.66	-0.6	4	2.9	Q9BX66	PF07653	SH3_2	54	6435.4	8.62	7	8	914	11460	0	18.5	88.52	-0.585	2
P00519	PF00017	SH2	76	8641.5	8.34	7	8	1193	14440	0	48.37	75.66	-0.6	4	1.73	Q9BX66	PF00018	SH3 1	48	5616.36	8.49	6	7	787	6990	0	10.56	71.04	-0.625	2
P01112	PF00071	Ras	161	18191.5	4.87	26	19	2542	12045	11920	38.37	87.14	-0.387	2	8.49	P15498	PF00130	C1_1	53	6139.05	8.92	4	8	826	3355	2980	60.14	33.21	-0.63	4
P01112	PF00071	Ras	161	18191.5	4.87	26	19	2542	12045	11920	38.37	87.14	-0.387	2	5.46	P15498	PF00621	RhoGEF	173	20375.7	7.9	24	25	2890	9065	8940	34.96	98.09	-0.408	1
P01112	PF00071	Ras	161	18191.5	4.87	26	19	2542	12045	11920	38.37	87.14	-0.387	2	1.86	P15498	PF00169	PH	102	12184	8.8	18	20	1711	15470	15470	41.2	73.63	-0.75	1
P01112	PF00071	Ras	161	18191.5	4.87	26	19	2542	12045	11920	38.37	87.14	-0.387	2	49.09	P20936	PF00616	RasGAP	108	12206.4	9.44	7	11	1757	8605	8480	54.56	117.31	0.198	2
P01112	PF00071	Ras	161	18191.5	4.87	26	19	2542	12045	11920	38.37	87.14	-0.387	2	7.55	P20936	PF00168	C2	99	11566.2	6.49	13	12	1624	14105	13980	47.24	84.65	-0.497	4
P01112	PF00071	Ras	161	18191.5	4.87	26	19	2542	12045	11920	38.37	87.14	-0.387	2	1.86	P20936	PF00169	PH	103	11972.8	8.44	12	14	1684	20065	19940	40.94	81.36	-0.276	4
P01112	PF00071	Ras	161	18191.5	4.87	26	19	2542	12045	11920	38.37	87.14	-0.387	2	1.98	P42336	PF02192	PI3K_p85B	120	13986.6	9.07	12	18	1999	17670	17420	48.03	103.08	-0.201	2
P01112	PF00071	Ras	161	18191.5	4.87	26	19	2542	12045	11920	38.37	87.14	-0.387	2	18.09	P42336	PF00454	PI3_PI4_kinase	220	25345.4	8.18	24	26	3553	20315	19940	43.83	90.86	-0.191	4
P01112	PF00071	Ras	161	18191.5	4.87	26	19	2542	12045	11920	38.37	87.14	-0.387	2	60.68	P42336	PF00613	PI3Ka	186	22310.9	8.2	25	27	3148	35785	35410	38.97	94.3	-0.455	4
P01112	PF00071	Ras	161	18191.5	4.87	26	19	2542	12045	11920	38.37	87.14	-0.387	2	60.71	P42336	PF00792	PI3K_C2	136	15359.5	5.29	17	13	2139	35325	34950	31	88.82	-0.314	4
P01112	PF00071	Ras	161	18191.5	4.87	26	19	2542	12045	11920	38.37	87.14	-0.387	2	60.9	P42336	PF00794	PI3K_rbd	76	9071.42	5.11	14	10	1287	3105	2980	60.42	100	-0.279	4
P01112	PF00071	Ras	161	18191.5	4.87	26	19	2542	12045	11920	38.37	87.14	-0.387	2	12.06	Q07889	PF00617	RasGEF	190	22157.5	6.09	27	24	3159	18575	18450	60.26	104.58	-0.316	1
P01112	PF00071	Ras	161	18191.5	4.87	26	19	2542	12045	11920	38.37	87.14	-0.387	2	12.64	Q07889	PF00618	RasGEF_N	118	14275.4	5.82	19	16	2014	14565	14440	51.21	92.54	-0.388	1
P01112	PF00071	Ras	161	18191.5	4.87	26	19	2542	12045	11920	38.37	87.14	-0.387	2	5.46	Q07889	PF00621	RhoGEF	178	20431.3	4.78	31	17	2877	10555	10430	54.63	102.42	-0.19	1
P01112	PF00071	Ras	161	18191.5	4.87	26	19	2542	12045	11920	38.37	87.14	-0.387	2	1.86	Q07889	PF00169	PH	119	13731.6	6.1	18	16	1903	15720	15470	21.33	73.03	-0.555	1
P01112	PF00071	Ras	161	18191.5	4.87	26	19	2542	12045	11920	38.37	87.14	-0.387	2	25.89	Q13009	PF02196	RBD	74	8743.09	5.18	11	7	1230	11585	11460	66.46	100.14	-0.336	3
P01112	PF00071	Ras	161	18191.5	4.87	26	19	2542	12045	11920	38.37	87.14	-0.387	2	2.1	Q13009	PF00595	PDZ	81	8755.86	5.26	12	10	1241	2980	0	41.36	100	-0.252	1
P01112	PF00071	Ras	161	18191.5	4.87	26	19	2542	12045	11920	38.37	87.14	-0.387	2	5.46	Q13009	PF00621	RhoGEF	189	21958.5	6	28	25	3135	12045	11920	24.47	101.59	-0.166	9
P01112	PF00071	Ras	161	18191.5	4.87	26	19	2542	12045	11920	38.37	87.14	-0.387	2	1.86	Q13009	PF00169	PH	133	15041.5	9.05	16	20	2136	19605	19480	38.48	90.9	-0.204	9
P01112	PF00071	Ras	161	18191.5	4.87	26	19	2542	12045	11920	38.37	87.14	-0.387	2	12.06	Q13905	PF00617	RasGEF	171	20057.1	5.69	23	20	2842	32555	32430	53.18	101.58	-0.267	4
P01112	PF00071	Ras	161	18191.5	4.87	26	19	2542	12045	11920	38.37	87.14	-0.387	2	12.64	Q13905	PF00618	RasGEF_N	117	13651	6.8	18	18	1966	6085	5960	36.52	116.5	0.107	5
P01112	PF00071	Ras	161	18191.5	4.87	26	19	2542	12045	11920	38.37	87.14	-0.387	2	5.46	Q15052	PF00621	RhoGEF	175	19889.8	5.17	21	12	2780	7825	7450	49.09	92.46	-0.223	1
P01112	PF00071	Ras	161	18191.5	4.87	26	19	2542	12045	11920	38.37	87.14	-0.387	2	1.86	Q15052	PF00169	PH	106	12191	4.75	14	9	1703	10095	9970	36.72	97.36	-0.078	3
P04216	PF00047	ig	99	11169.5	8.87	8	11	1548	7575	7450	37.13	63.94	-0.579	2	1.66	P56199	PF01839	FG-GAP	40	4444	4.14	7	3	620	4470	0	43.18	82.75	-0.237	2
P04216	PF00047	ig	99	11169.5	8.87	8	11	1548	7575	7450	37.13	63.94	-0.579	2	1.72	P56199	PF08441	Integrin_alpha2	397	44956.8	5.75	51	43	6275	22850	22350	50.99	79.95	-0.406	2
P04216	PF00047	ig	99	11169.5	8.87	8	11	1548	7575	7450	37.13	63.94	-0.579	2	2.43	P56199	PF00092	VWA	183	20487.2	5.64	27	23	2893	11460	11460	22.03	92.08	-0.331	2
P04216	PF00047	ig	99	11169.5	8.87	8	11	1548	7575	7450	37.13	63.94	-0.579	2	6.01	Q13017	PF00620	RhoGAP	152	17527.1	5.46	22	16	2464	11585	11460	30.52	92.96	-0.287	2
P05556	PF00362	Integrin_beta	245	27247.8	4.91	28	19	3796	23630	23380	40.36	86.69	-0.173	2	113.89	P21333	PF00630	Filamin	94	10355.7	8.97	11	13	1456	9970	0	39.54	64.26	-0.627	5
P05556	PF00362	Integrin_beta	245	27247.8	4.91	28	19	3796	23630	23380	40.36	86.69	-0.173	2	2.06	P35240	PF00769	ERM	249	28762.7	5.04	56	43	4069	2980	0	63.55	80.12	-0.91	4
P05556	PF00362	Integrin_beta	245	27247.8	4.91	28	19	3796	23630	23380	40.36	86.69	-0.173	2	9.65	P35240	PF00373	FERM_M	118	14007	4.86	21	13	1957	24410	24410	51.49	86.02	-0.482	2
P05556	PF00362	Integrin_beta	245	27247.8	4.91	28	19	3796	23630	23380	40.36	86.69	-0.173	2	79.88	P56199	PF01839	FG-GAP	40	4444	4.14	7	3	620	4470	0	43.18	82.75	-0.237	2
P05556	PF07965	Integrin_B_tail	89	10217.4	4.91	16	10	1378	10470	9970	51.49	43.6	-0.873	2	86.66	P56199	PF08441	Integrin_alpha2	397	44956.8	5.75	51	43	6275	22850	22350	50.99	79.95	-0.406	2
P05556	PF00362	Integrin_beta	245	27247.8	4.91	28	19	3796	23630	23380	40.36	86.69	-0.173	2	87.31	P56199	PF08441	Integrin_alpha2	397	44956.8	5.75	51	43	6275	22850	22350	50.99	79.95	-0.406	2
P05556	PF07974	EGF_2	32	3353.81	6.14	3	3	441	375	0	18.91	36.56	-0.338	2	7.09	P56199	PF08441	Integrin_alpha2	397	44956.8	5.75	51	43	6275	22850	22350	50.99	79.95	-0.406	2
P05556	PF00362	Integrin_beta	245	27247.8	4.91	28	19	3796	23630	23380	40.36	86.69	-0.173	2	7.19	P98161	PF01477	PLAT	112	12609.2	8.43	11	12	1764	30480	0	35.38	91.34	-0.19	2
P05556	PF00362	Integrin_beta	245	27247.8	4.91	28	19	3796	23630	23380	40.36	86.69	-0.173	2	1.83	Q05397	PF03623	Focal_AT	133	14817.3	5.68	17	15	2127	5960	0	44.65	110.75	-0.109	1
P05556	PF00362	Integrin_beta	245	27247.8	4.91	28	19	3796	23630	23380	40.36	86.69	-0.173	2	9.65	Q05397	PF00373	FERM_M	125	15004.3	8.52	19	21	2128	13075	12950	48.15	86.56	-0.499	9
P05556	PF00362	Integrin_beta	245	27247.8	4.91	28	19	3796	23630	23380	40.36	86.69	-0.173	2	51.67	Q08722	PF04549	CD47	149	15821.5	9.01	3	6	2355	14565	14440	25.07	170.74	1.623	2
P05556	PF00362	Integrin_beta	245	27247.8	4.91	28	19	3796	23630	23380	40.36	86.69	-0.173	2	1.83	Q14289	PF03623	Focal_AT	133	14625.9	5.16	18	15	2101	3105	2980	38.36	120.9	-0.042	1
P05556	PF00362	Integrin_beta	245	27247.8	4.91	28	19	3796	23630	23380	40.36	86.69	-0.173	2	9.65	Q14289	PF00373	FERM_M	120	14427.7	8.53	16	18	2021	7575	7450	63.36	70.75	-0.588	4
P05556	PF00362	Integrin_beta	245	27247.8	4.91	28	19	3796	23630	23380	40.36	86.69	-0.173	2	9.65	Q96AC1	PF00373	FERM_M	292	33477.5	5.73	38	32	4703	44265	43890	51	87.91	-0.371	4
P05556	PF00362	Integrin_beta	245	27247.8	4.91	28	19	3796	23630	23380	40.36	86.69	-0.173	2	9.65	Q9BQL6	PF00373	FERM_M	292	33312.3	5.25	42	34	4684	37275	36900	49.37	90.96	-0.291	4
P05556	PF00362	Integrin_beta	245	27247.8	4.91	28	19	3796	23630	23380	40.36	86.69	-0.173	2	17.78	Q9Y490	PF01608	I_LWEQ	138	14690.7	6.82	19	19	2075	5625	5500	41.45	87.25	-0.334	5
P05556	PF00362	Integrin_beta	245	27247.8	4.91	28	19	3796	23630	23380	40.36	86.69	-0.173	2	20.7	Q9Y490	PF08913	VBS	125	13322.1	6.87	14	14	1873	4595	4470	44.05	84.4	-0.255	5
P05556	PF00362	Integrin_beta	245	27247.8	4.91	28	19	3796	23630	23380	40.36	86.69	-0.173	2	20.7	Q9Y490	PF09141	Talin_middle	162	16554.4	4.68	18	11	2319	6990	6990	38.28	88.77	-0.16	3
P05556	PF07965	Integrin_B_tail	89	10217.4	4.91	16	10	1378	10470	9970	51.49	43.6	-0.873	2	20.71	Q9Y490	PF08913	VBS	125	13322.1	6.87	14	14	1873	4595	4470	44.05	84.4	-0.255	5
P05556	PF07965	Integrin_B_tail	89	10217.4	4.91	16	10	1378	10470	9970	51.49	43.6	-0.873	2	20.71	Q9Y490	PF09141	Talin_middle	162	16554.4	4.68	18	11	2319	6990	6990	38.28	88.77	-0.16	3
P05556	PF08725	Integrin_b_cyt	45	5370.23	9.11	7	9	762	8480	0	17.19	69.33	-0.8	2	22.9	Q9Y490	PF08913	VBS	125	13322.1	6.87	14	14	1873	4595	4470	44.05	84.4	-0.255	5
P05556	PF08725	Integrin_b_cyt	45	5370.23	9.11	7	9	762	8480	0	17.19	69.33	-0.8	2	22.9	Q9Y490	PF09141	Talin_middle	162	16554.4	4.68	18	11	2319	6990	6990	38.28	88.77	-0.16	3
P05556	PF07974	EGF_2	32	3353.81	6.14	3	3	441	375	0	18.91	36.56	-0.338	2	13.94	Q9Y490	PF08913	VBS	125	13322.1	6.87	14	14	1873	4595	4470	44.05	84.4	-0.255	5
P05556	PF07974	EGF_2	32	3353.81	6.14	3	3	441	375	0	18.91	36.56	-0.338	2	13.94	Q9Y490	PF09141	Talin_middle	162	16554.4	4.68	18	11	2319	6990	6990	38.28	88.77	-0.16	3
P05556	PF00362	Integrin_beta	245	27247.8	4.91	28	19	3796	23630	23380	40.36	86.69	-0.173	2	9.65	Q9Y490	PF00373	FERM_M	113	13023.8	8.78	14	17	1822	6085	5960	35.83	71.59	-0.624	4
P06241	PF00018	SH3 1	48	5513.93	4.31	10	4	751	15470	0	40.5	61.04	-0.798	4	1.93	O43150	PF00169	PH	92	10712.2	9.16	11	16	1495	14230	13980	38.15	62.5	-0.967	4
P06241	PF00017	SH2	73	8604.71	9.69	9	14	1203	18450	0	11.16	61.51	-0.918	4	2.61	O43150	PF00169	PH	92	10712.2	9.16	11	16	1495	14230	13980	38.15	62.5	-0.967	4
P06241	PF00017	SH2	73	8604.71	9.69	9	14	1203	18450	0	11.16	61.51	-0.918	4	1.73	O43150	PF00018	SH3 1	52	5761.24	3.94	12	2	781	12490	12490	27.65	78.65	-0.327	3
P06241	PF07714	Pkinase Tyr	250	28475.1	7.79	30	31	4027	42650	42400	40.14	91.68	-0.221	4	2.68	P05556	PF07974	EGF_2	32	3353.81	6.14	3	3	441	375	0	18.91	36.56	-0.338	2
P06241	PF00017	SH2	73	8604.71	9.69	9	14	1203	18450	0	11.16	61.51	-0.918	4	2.24	P10586	PF00041	fn3	82	8715.64	4.56	8	5	1215	12950	0	34.9	73.66	-0.165	2
P06241	PF00018	SH3 1	48	5513.93	4.31	10	4	751	15470	0	40.5	61.04	-0.798	4	1.55	P10586	PF00102	Y_phosphatase	232	26607.5	7.77	26	27	3705	40255	39880	36.26	77.28	-0.331	2
P06241	PF00017	SH2	73	8604.71	9.69	9	14	1203	18450	0	11.16	61.51	-0.918	4	2.84	P10586	PF00102	Y_phosphatase	232	26607.5	7.77	26	27	3705	40255	39880	36.26	77.28	-0.331	2
P06241	PF00018	SH3 1	48	5513.93	4.31	10	4	751	15470	0	40.5	61.04	-0.798	4	1.56	P12931	PF07714	Pkinase Tyr	250	28537.2	7.01	31	31	4023	44265	43890	41.6	86.96	-0.204	4
P06241	PF00017	SH2	73	8604.71	9.69	9	14	1203	18450	0	11.16	61.51	-0.918	4	2.39	P12931	PF07714	Pkinase Tyr	250	28537.2	7.01	31	31	4023	44265	43890	41.6	86.96	-0.204	4
P06241	PF00017	SH2	73	8604.71	9.69	9	14	1203	18450	0	11.16	61.51	-0.918	4	1.73	P12931	PF00018	SH3 1	48	5477.99	4.7	7	4	756	15470	0	24.9	73.13	-0.669	2
P06241	PF00018	SH3 1	48	5513.93	4.31	10	4	751	15470	0	40.5	61.04	-0.798	4	2.05	P15498	PF00130	C1_1	53	6139.05	8.92	4	8	826	3355	2980	60.14	33.21	-0.63	4
P06241	PF00017	SH2	73	8604.71	9.69	9	14	1203	18450	0	11.16	61.51	-0.918	4	2.62	P15498	PF00130	C1_1	53	6139.05	8.92	4	8	826	3355	2980	60.14	33.21	-0.63	4
P06241	PF00018	SH3 1	48	5513.93	4.31	10	4	751	15470	0	40.5	61.04	-0.798	4	2.25	P15498	PF00621	RhoGEF	173	20375.7	7.9	24	25	2890	9065	8940	34.96	98.09	-0.408	1
P06241	PF00017	SH2	73	8604.71	9.69	9	14	1203	18450	0	11.16	61.51	-0.918	4	3.06	P15498	PF00621	RhoGEF	173	20375.7	7.9	24	25	2890	9065	8940	34.96	98.09	-0.408	1
P06241	PF00018	SH3 1	48	5513.93	4.31	10	4	751	15470	0	40.5	61.04	-0.798	4	1.79	P15498	PF00307	CH	120	13979.4	7.59	11	12	1974	23865	23490	42.88	107.25	0.141	3
P06241	PF00017	SH2	73	8604.71	9.69	9	14	1203	18450	0	11.16	61.51	-0.918	4	2.09	P15498	PF00307	CH	120	13979.4	7.59	11	12	1974	23865	23490	42.88	107.25	0.141	3
P06241	PF00018	SH3 1	48	5513.93	4.31	10	4	751	15470	0	40.5	61.04	-0.798	4	1.93	P15498	PF00169	PH	102	12184	8.8	18	20	1711	15470	15470	41.2	73.63	-0.75	1
P06241	PF00017	SH2	73	8604.71	9.69	9	14	1203	18450	0	11.16	61.51	-0.918	4	2.61	P15498	PF00169	PH	102	12184	8.8	18	20	1711	15470	15470	41.2	73.63	-0.75	1
P06241	PF00017	SH2	73	8604.71	9.69	9	14	1203	18450	0	11.16	61.51	-0.918	4	1.73	P15498	PF00018	SH3 1	38	4419.89	4.42	6	3	606	16500	16500	27.68	64.21	-0.703	2
P06241	PF00017	SH2	73	8604.71	9.69	9	14	1203	18450	0	11.16	61.51	-0.918	4	1.74	P17252	PF00168	C2	107	12484.4	9.56	14	19	1765	24980	0	30.69	70.09	-0.824	4
P06241	PF00018	SH3 1	48	5513.93	4.31	10	4	751	15470	0	40.5	61.04	-0.798	4	2.05	P17252	PF00130	C1_1	53	6193.25	8.82	2	6	841	5875	5500	48.92	40.38	0.134	2
P06241	PF00017	SH2	73	8604.71	9.69	9	14	1203	18450	0	11.16	61.51	-0.918	4	2.62	P17252	PF00130	C1_1	53	6193.25	8.82	2	6	841	5875	5500	48.92	40.38	0.134	2
P06241	PF00018	SH3 1	48	5513.93	4.31	10	4	751	15470	0	40.5	61.04	-0.798	4	1.81	P17252	PF00069	Pkinase	259	29537.2	5.41	38	29	4135	29255	28880	31.95	85.02	-0.132	2
P06241	PF00018	SH3 1	48	5513.93	4.31	10	4	751	15470	0	40.5	61.04	-0.798	4	1.55	P18433	PF00102	Y_phosphatase	236	27345.5	8.62	24	28	3815	44265	43890	22	76.69	-0.289	2
P06241	PF00017	SH2	73	8604.71	9.69	9	14	1203	18450	0	11.16	61.51	-0.918	4	2.84	P18433	PF00102	Y_phosphatase	236	27345.5	8.62	24	28	3815	44265	43890	22	76.69	-0.289	2
P06241	PF00018	SH3 1	48	5513.93	4.31	10	4	751	15470	0	40.5	61.04	-0.798	4	1.53	P19174	PF00387	PI-PLC-Y	134	15558.1	9.43	14	22	2189	16180	15930	47.53	70.6	-0.613	1
P06241	PF00017	SH2	73	8604.71	9.69	9	14	1203	18450	0	11.16	61.51	-0.918	4	2.78	P19174	PF00388	PI-PLC-X	144	16350.8	7.7	15	16	2287	20190	19940	49.06	84.65	-0.327	4
P06241	PF00017	SH2	73	8604.71	9.69	9	14	1203	18450	0	11.16	61.51	-0.918	4	3.04	P19174	PF00387	PI-PLC-Y	134	15558.1	9.43	14	22	2189	16180	15930	47.53	70.6	-0.613	1
P06241	PF00017	SH2	73	8604.71	9.69	9	14	1203	18450	0	11.16	61.51	-0.918	4	1.74	P19174	PF00168	C2	106	11892.7	6.12	12	11	1675	10095	9970	36.59	82.74	-0.049	4
P06241	PF00017	SH2	73	8604.71	9.69	9	14	1203	18450	0	11.16	61.51	-0.918	4	1.73	P19174	PF00018	SH3 1	37	4433.95	5.1	7	6	618	13980	0	35.29	68.65	-0.916	3
P06241	PF00017	SH2	73	8604.71	9.69	9	14	1203	18450	0	11.16	61.51	-0.918	4	1.74	P20936	PF00168	C2	99	11566.2	6.49	13	12	1624	14105	13980	47.24	84.65	-0.497	4
P06241	PF00018	SH3 1	48	5513.93	4.31	10	4	751	15470	0	40.5	61.04	-0.798	4	1.93	P20936	PF00169	PH	103	11972.8	8.44	12	14	1684	20065	19940	40.94	81.36	-0.276	4
P06241	PF00017	SH2	73	8604.71	9.69	9	14	1203	18450	0	11.16	61.51	-0.918	4	2.61	P20936	PF00169	PH	103	11972.8	8.44	12	14	1684	20065	19940	40.94	81.36	-0.276	4
P06241	PF00017	SH2	73	8604.71	9.69	9	14	1203	18450	0	11.16	61.51	-0.918	4	1.73	P20936	PF00018	SH3 1	49	5736.51	4.28	10	4	802	12490	0	27.96	97.35	-0.237	4
P06241	PF00018	SH3 1	48	5513.93	4.31	10	4	751	15470	0	40.5	61.04	-0.798	4	1.79	P21333	PF00307	CH	108	12579.8	9.69	10	16	1815	12615	12490	40.82	120.93	-0.118	2
P06241	PF00017	SH2	73	8604.71	9.69	9	14	1203	18450	0	11.16	61.51	-0.918	4	2.09	P21333	PF00307	CH	108	12579.8	9.69	10	16	1815	12615	12490	40.82	120.93	-0.118	2
P06241	PF00018	SH3 1	48	5513.93	4.31	10	4	751	15470	0	40.5	61.04	-0.798	4	3.73	P29353	PF00640	PID	157	17268.9	9	13	18	2425	7825	7450	53.52	87.64	-0.078	4
P06241	PF00017	SH2	73	8604.71	9.69	9	14	1203	18450	0	11.16	61.51	-0.918	4	4.34	P29353	PF00640	PID	157	17268.9	9	13	18	2425	7825	7450	53.52	87.64	-0.078	4
P06241	PF00018	SH3 1	48	5513.93	4.31	10	4	751	15470	0	40.5	61.04	-0.798	4	1.84	P35568	PF02174	IRS	103	11591.5	8.01	10	11	1638	12615	12490	38.31	95.53	0.108	4
P06241	PF00017	SH2	73	8604.71	9.69	9	14	1203	18450	0	11.16	61.51	-0.918	4	13.04	P35568	PF02174	IRS	103	11591.5	8.01	10	11	1638	12615	12490	38.31	95.53	0.108	4
P06241	PF00018	SH3 1	48	5513.93	4.31	10	4	751	15470	0	40.5	61.04	-0.798	4	1.93	P35568	PF00169	PH	108	12525.1	9.55	14	20	1751	18450	18450	66.42	65.19	-0.872	4
P06241	PF00017	SH2	73	8604.71	9.69	9	14	1203	18450	0	11.16	61.51	-0.918	4	2.61	P35568	PF00169	PH	108	12525.1	9.55	14	20	1751	18450	18450	66.42	65.19	-0.872	4
P06241	PF00017	SH2	73	8604.71	9.69	9	14	1203	18450	0	11.16	61.51	-0.918	4	5.51	P40763	PF01017	STAT_alpha	173	20375.3	5.33	27	23	2864	15595	15470	62.53	87.86	-0.775	4
P06241	PF00017	SH2	73	8604.71	9.69	9	14	1203	18450	0	11.16	61.51	-0.918	4	5.66	P40763	PF02865	STAT_int	119	14358.3	6.08	14	12	2006	30940	30940	71.87	91.09	-0.543	4
P06241	PF00017	SH2	73	8604.71	9.69	9	14	1203	18450	0	11.16	61.51	-0.918	4	6.03	P40763	PF02864	STAT_bind	140	15747.3	8.41	16	18	2233	3230	2980	34.73	95.29	-0.236	4
P06241	PF00018	SH3 1	48	5513.93	4.31	10	4	751	15470	0	40.5	61.04	-0.798	4	1.56	P41240	PF07714	Pkinase_Tyr	246	27472.8	7.75	31	32	3885	35660	35410	32.98	92.68	-0.14	4
P06241	PF00017	SH2	73	8604.71	9.69	9	14	1203	18450	0	11.16	61.51	-0.918	4	2.39	P41240	PF07714	Pkinase_Tyr	246	27472.8	7.75	31	32	3885	35660	35410	32.98	92.68	-0.14	4
P06241	PF00017	SH2	73	8604.71	9.69	9	14	1203	18450	0	11.16	61.51	-0.918	4	1.73	P41240	PF00018	SH3 1	48	5318.14	8.9	5	7	756	8480	8480	14.35	83.33	-0.315	4
P06241	PF00017	SH2	73	8604.71	9.69	9	14	1203	18450	0	11.16	61.51	-0.918	4	1.63	P42336	PF00794	PI3K_rbd	76	9071.42	5.11	14	10	1287	3105	2980	60.42	100	-0.279	4
P06241	PF00017	SH2	73	8604.71	9.69	9	14	1203	18450	0	11.16	61.51	-0.918	4	2.78	P42336	PF02192	PI3K_p85B	120	13986.6	9.07	12	18	1999	17670	17420	48.03	103.08	-0.201	2
P06241	PF00018	SH3 1	48	5513.93	4.31	10	4	751	15470	0	40.5	61.04	-0.798	4	1.56	P43405	PF07714	Pkinase_Tyr	256	29440	7.55	32	33	4114	55600	55350	30.88	78.83	-0.389	2
P06241	PF00017	SH2	73	8604.71	9.69	9	14	1203	18450	0	11.16	61.51	-0.918	4	2.39	P43405	PF07714	Pkinase_Tyr	256	29440	7.55	32	33	4114	55600	55350	30.88	78.83	-0.389	2
P06241	PF00018	SH3 1	48	5513.93	4.31	10	4	751	15470	0	40.5	61.04	-0.798	4	2.72	P46108	PF07653	SH3_2	57	6453.43	9.36	6	9	918	8480	8480	29.38	90.53	-0.374	1
P06241	PF00017	SH2	73	8604.71	9.69	9	14	1203	18450	0	11.16	61.51	-0.918	4	2.9	P46108	PF07653	SH3_2	57	6453.43	9.36	6	9	918	8480	8480	29.38	90.53	-0.374	1
P06241	PF00017	SH2	73	8604.71	9.69	9	14	1203	18450	0	11.16	61.51	-0.918	4	1.73	P46108	PF00018	SH3 1	47	5563.16	4.58	12	8	768	11000	0	61.27	60.21	-1.183	1
P06241	PF00018	SH3 1	48	5513.93	4.31	10	4	751	15470	0	40.5	61.04	-0.798	4	18.95	P49023	PF00412	LIM	56	6445.28	6.44	7	6	869	8730	8480	41.37	41.79	-0.646	4
P06241	PF00017	SH2	73	8604.71	9.69	9	14	1203	18450	0	11.16	61.51	-0.918	4	20.99	P49023	PF00412	LIM	56	6445.28	6.44	7	6	869	8730	8480	41.37	41.79	-0.646	4
P06241	PF07714	Pkinase Tyr	250	28475.1	7.79	30	31	4027	42650	42400	40.14	91.68	-0.221	4	24.69	P56945	PF08824	Serine_rich	155	16272.3	5.76	18	13	2291	5500	5500	49.48	100.26	-0.056	2
P06241	PF00017	SH2	73	8604.71	9.69	9	14	1203	18450	0	11.16	61.51	-0.918	4	24.78	P56945	PF08824	Serine_rich	155	16272.3	5.76	18	13	2291	5500	5500	49.48	100.26	-0.056	2
P06241	PF00018	SH3 1	48	5513.93	4.31	10	4	751	15470	0	40.5	61.04	-0.798	4	27.54	P56945	PF08824	Serine_rich	155	16272.3	5.76	18	13	2291	5500	5500	49.48	100.26	-0.056	2
P06241	PF00017	SH2	73	8604.71	9.69	9	14	1203	18450	0	11.16	61.51	-0.918	4	1.73	P56945	PF00018	SH3 1	49	5447.1	4.45	8	4	754	12490	12490	34.24	85.51	-0.394	3
P06241	PF00017	SH2	73	8604.71	9.69	9	14	1203	18450	0	11.16	61.51	-0.918	4	1.73	P62993	PF00018	SH3 1	47	5438.11	4.85	10	8	760	8480	8480	23.19	72.77	-0.8	2
P06241	PF00018	SH3 1	48	5513.93	4.31	10	4	751	15470	0	40.5	61.04	-0.798	4	5.45	P98161	PF01822	WSC	82	8080.11	4.4	4	1	1095	7490	6990	67.39	65.73	0.35	3
P06241	PF00017	SH2	73	8604.71	9.69	9	14	1203	18450	0	11.16	61.51	-0.918	4	2.75	Q03135	PF01146	Caveolin	134	15521	5.64	15	11	2198	31065	30940	23.41	110.52	0.383	9
P06241	PF00017	SH2	73	8604.71	9.69	9	14	1203	18450	0	11.16	61.51	-0.918	4	2.04	Q03405	PF00021	UPAR LY6	75	8457.65	4.89	13	9	1167	7490	6990	36.86	83.07	-0.351	2
P06241	PF00018	SH3 1	48	5513.93	4.31	10	4	751	15470	0	40.5	61.04	-0.798	4	1.56	Q05397	PF07714	Pkinase_Tyr	255	29112.9	8.73	26	31	4095	42900	42400	57.74	88.31	-0.132	2
P06241	PF00017	SH2	73	8604.71	9.69	9	14	1203	18450	0	11.16	61.51	-0.918	4	2.39	Q05397	PF07714	Pkinase_Tyr	255	29112.9	8.73	26	31	4095	42900	42400	57.74	88.31	-0.132	2
P06241	PF00018	SH3 1	48	5513.93	4.31	10	4	751	15470	0	40.5	61.04	-0.798	4	1.55	Q06124	PF00102	Y_phosphatase	252	29018.1	7.8	32	33	4054	37150	36900	35.25	78.77	-0.515	4
P06241	PF00017	SH2	73	8604.71	9.69	9	14	1203	18450	0	11.16	61.51	-0.918	4	2.84	Q06124	PF00102	Y_phosphatase	252	29018.1	7.8	32	33	4054	37150	36900	35.25	78.77	-0.515	4
P06241	PF00018	SH3 1	48	5513.93	4.31	10	4	751	15470	0	40.5	61.04	-0.798	4	3.12	Q07889	PF00617	RasGEF	190	22157.5	6.09	27	24	3159	18575	18450	60.26	104.58	-0.316	1
P06241	PF00018	SH3 1	48	5513.93	4.31	10	4	751	15470	0	40.5	61.04	-0.798	4	3.2	Q07889	PF00618	RasGEF_N	118	14275.4	5.82	19	16	2014	14565	14440	51.21	92.54	-0.388	1
P06241	PF00017	SH2	73	8604.71	9.69	9	14	1203	18450	0	11.16	61.51	-0.918	4	3.3	Q07889	PF00617	RasGEF	190	22157.5	6.09	27	24	3159	18575	18450	60.26	104.58	-0.316	1
P06241	PF00017	SH2	73	8604.71	9.69	9	14	1203	18450	0	11.16	61.51	-0.918	4	3.44	Q07889	PF00618	RasGEF_N	118	14275.4	5.82	19	16	2014	14565	14440	51.21	92.54	-0.388	1
P06241	PF00018	SH3 1	48	5513.93	4.31	10	4	751	15470	0	40.5	61.04	-0.798	4	2.25	Q07889	PF00621	RhoGEF	178	20431.3	4.78	31	17	2877	10555	10430	54.63	102.42	-0.19	1
P06241	PF00017	SH2	73	8604.71	9.69	9	14	1203	18450	0	11.16	61.51	-0.918	4	3.06	Q07889	PF00621	RhoGEF	178	20431.3	4.78	31	17	2877	10555	10430	54.63	102.42	-0.19	1
P06241	PF00018	SH3 1	48	5513.93	4.31	10	4	751	15470	0	40.5	61.04	-0.798	4	1.93	Q07889	PF00169	PH	119	13731.6	6.1	18	16	1903	15720	15470	21.33	73.03	-0.555	1
P06241	PF00017	SH2	73	8604.71	9.69	9	14	1203	18450	0	11.16	61.51	-0.918	4	2.61	Q07889	PF00169	PH	119	13731.6	6.1	18	16	1903	15720	15470	21.33	73.03	-0.555	1
P06241	PF00018	SH3 1	48	5513.93	4.31	10	4	751	15470	0	40.5	61.04	-0.798	4	3.12	Q13905	PF00617	RasGEF	171	20057.1	5.69	23	20	2842	32555	32430	53.18	101.58	-0.267	4
P06241	PF00018	SH3 1	48	5513.93	4.31	10	4	751	15470	0	40.5	61.04	-0.798	4	3.2	Q13905	PF00618	RasGEF_N	117	13651	6.8	18	18	1966	6085	5960	36.52	116.5	0.107	5
P06241	PF00017	SH2	73	8604.71	9.69	9	14	1203	18450	0	11.16	61.51	-0.918	4	3.3	Q13905	PF00617	RasGEF	171	20057.1	5.69	23	20	2842	32555	32430	53.18	101.58	-0.267	4
P06241	PF00017	SH2	73	8604.71	9.69	9	14	1203	18450	0	11.16	61.51	-0.918	4	3.44	Q13905	PF00618	RasGEF_N	117	13651	6.8	18	18	1966	6085	5960	36.52	116.5	0.107	5
P06241	PF00017	SH2	73	8604.71	9.69	9	14	1203	18450	0	11.16	61.51	-0.918	4	1.73	Q14185	PF00018	SH3 1	51	5943.67	8.27	6	7	830	14440	0	34.73	74.71	-0.59	4
P06241	PF00018	SH3 1	48	5513.93	4.31	10	4	751	15470	0	40.5	61.04	-0.798	4	1.56	Q14289	PF07714	Pkinase_Tyr	255	29581.5	5.82	35	31	4171	51380	50880	52.15	96.24	-0.081	2
P06241	PF00017	SH2	73	8604.71	9.69	9	14	1203	18450	0	11.16	61.51	-0.918	4	2.39	Q14289	PF07714	Pkinase_Tyr	255	29581.5	5.82	35	31	4171	51380	50880	52.15	96.24	-0.081	2
P06241	PF00018	SH3 1	48	5513.93	4.31	10	4	751	15470	0	40.5	61.04	-0.798	4	2.8	Q86YL6	PF00620	RhoGAP	153	17624.2	6.17	18	15	2487	17545	17420	50.95	102.61	-0.192	1
P06241	PF00017	SH2	73	8604.71	9.69	9	14	1203	18450	0	11.16	61.51	-0.918	4	3.6	Q86YL6	PF00620	RhoGAP	153	17624.2	6.17	18	15	2487	17545	17420	50.95	102.61	-0.192	1
P06241	PF00017	SH2	73	8604.71	9.69	9	14	1203	18450	0	11.16	61.51	-0.918	4	1.73	Q86YL6	PF00018	SH3 9	52	5849.81	6.89	6	6	830	12490	12490	11.89	95.38	0.008	9
P06241	PF00017	SH2	73	8604.71	9.69	9	14	1203	18450	0	11.16	61.51	-0.918	4	2.48	Q8IZP0	PF07815	Abi_HHR	78	8855.19	10.34	7	15	1267	8480	0	33.51	83.72	-0.771	4
P06241	PF00017	SH2	73	8604.71	9.69	9	14	1203	18450	0	11.16	61.51	-0.918	4	1.73	Q8IZP0	PF00018	SH3 1	46	5249.9	4.31	9	5	726	11460	11460	9.09	80.43	-0.315	4
P06241	PF00018	SH3 1	48	5513.93	4.31	10	4	751	15470	0	40.5	61.04	-0.798	4	4.04	Q92556	PF04727	ELMO_CED12	179	21109.1	5.54	29	23	2909	11710	11460	51.66	63.24	-0.607	4
P06241	PF00017	SH2	73	8604.71	9.69	9	14	1203	18450	0	11.16	61.51	-0.918	4	1.73	Q96B97	PF00018	SH3 1	49	5722.25	4.45	10	5	786	12490	0	34.06	75.51	-0.765	4
P06241	PF00018	SH3 1	48	5513.93	4.31	10	4	751	15470	0	40.5	61.04	-0.798	4	18.95	Q9BPW3	PF00412	LIM	46	4651.24	6.89	3	3	631	5750	5500	33.19	55.22	0.052	2
P06241	PF00017	SH2	73	8604.71	9.69	9	14	1203	18450	0	11.16	61.51	-0.918	4	20.99	Q9BPW3	PF00412	LIM	46	4651.24	6.89	3	3	631	5750	5500	33.19	55.22	0.052	2
P06241	PF00018	SH3 1	48	5513.93	4.31	10	4	751	15470	0	40.5	61.04	-0.798	4	18.95	O60711	PF00412	LIM	56	6306.15	6.54	5	4	856	8730	8480	66.88	59.29	-0.28	3
P06241	PF00017	SH2	73	8604.71	9.69	9	14	1203	18450	0	11.16	61.51	-0.918	4	20.99	O60711	PF00412	LIM	56	6306.15	6.54	5	4	856	8730	8480	66.88	59.29	-0.28	3
P00519	PF00018	SH3 1	47	5154.7	5.56	5	4	711	13980	13980	11.34	72.55	-0.502	4	2.83	P22681	PF00627	UBA	47	5272.97	4.59	5	3	742	2980	0	103.58	103.83	-0.151	4
P00519	PF00017	SH2	76	8641.5	8.34	7	8	1193	14440	0	48.37	75.66	-0.6	4	5.21	P22681	PF02262	Cbl_N	125	14848.5	9.46	15	22	2117	13075	12950	31.71	84.96	-0.525	4
P00519	PF00017	SH2	76	8641.5	8.34	7	8	1193	14440	0	48.37	75.66	-0.6	4	5.21	P22681	PF02761	Cbl_N2	84	9796.25	8.14	9	10	1378	23490	23490	23.32	84.88	-0.079	4
P00519	PF00017	SH2	76	8641.5	8.34	7	8	1193	14440	0	48.37	75.66	-0.6	4	5.21	P22681	PF02762	Cbl_N3	86	9890.32	8.85	7	9	1387	12950	12950	46.45	80.58	-0.307	4
P00519	PF00018	SH3 1	47	5154.7	5.56	5	4	711	13980	13980	11.34	72.55	-0.502	4	9.54	P22681	PF02262	Cbl_N	125	14848.5	9.46	15	22	2117	13075	12950	31.71	84.96	-0.525	4
P00519	PF00018	SH3 1	47	5154.7	5.56	5	4	711	13980	13980	11.34	72.55	-0.502	4	9.54	P22681	PF02761	Cbl_N2	84	9796.25	8.14	9	10	1378	23490	23490	23.32	84.88	-0.079	4
P00519	PF00018	SH3 1	47	5154.7	5.56	5	4	711	13980	13980	11.34	72.55	-0.502	4	9.54	P22681	PF02762	Cbl_N3	86	9890.32	8.85	7	9	1387	12950	12950	46.45	80.58	-0.307	4
Q13153	PF00069	Pkinase	252	28371.6	4.83	34	23	3983	30160	29910	39.46	93.61	-0.173	4	1.69	P19174	PF00168	C2	106	11892.7	6.12	12	11	1675	10095	9970	36.59	82.74	-0.049	4
P19174	PF00168	C2	106	11892.7	6.12	12	11	1675	10095	9970	36.59	82.74	-0.049	4	1.84	P17252	PF00168	C2	107	12484.4	9.56	14	19	1765	24980	0	30.69	70.09	-0.824	4
P19174	PF00168	C2	106	11892.7	6.12	12	11	1675	10095	9970	36.59	82.74	-0.049	4	3.43	P17252	PF00433	Pkinase_C	36	4107.5	3.96	6	2	565	1490	0	40.53	65	-0.394	2
P19174	PF00017	SH2	90	10381.6	6.19	12	10	1434	17085	16960	38.82	73.67	-0.412	4	1.74	P17252	PF00168	C2	107	12484.4	9.56	14	19	1765	24980	0	30.69	70.09	-0.824	4
P19174	PF00018	SH3 1	37	4433.95	5.1	7	6	618	13980	0	35.29	68.65	-0.916	3	2.05	P17252	PF00130	C1_1	53	6193.25	8.82	2	6	841	5875	5500	48.92	40.38	0.134	2
P19174	PF00017	SH2	90	10381.6	6.19	12	10	1434	17085	16960	38.82	73.67	-0.412	4	2.62	P17252	PF00130	C1_1	53	6193.25	8.82	2	6	841	5875	5500	48.92	40.38	0.134	2
P19174	PF00018	SH3 1	37	4433.95	5.1	7	6	618	13980	0	35.29	68.65	-0.916	3	1.81	P17252	PF00069	Pkinase	259	29537.2	5.41	38	29	4135	29255	28880	31.95	85.02	-0.132	2
P15498	PF00017	SH2	75	8598.93	9.06	10	12	1222	11460	0	32.37	88.53	-0.211	2	1.73	P62993	PF00018	SH3 1	47	5438.11	4.85	10	8	760	8480	8480	23.19	72.77	-0.8	2
P28482	PF00069	Pkinase	289	33468.8	8.56	30	34	4739	40715	40340	40.47	104.95	-0.213	1	2.05	P15498	PF00130	C1_1	53	6139.05	8.92	4	8	826	3355	2980	60.14	33.21	-0.63	4
P28482	PF00069	Pkinase	289	33468.8	8.56	30	34	4739	40715	40340	40.47	104.95	-0.213	1	2.13	P15498	PF00621	RhoGEF	173	20375.7	7.9	24	25	2890	9065	8940	34.96	98.09	-0.408	1
P28482	PF00069	Pkinase	289	33468.8	8.56	30	34	4739	40715	40340	40.47	104.95	-0.213	1	1.6	P15498	PF00169	PH	102	12184	8.8	18	20	1711	15470	15470	41.2	73.63	-0.75	1
Q14247	PF00018	SH3 1	49	5619.15	3.79	11	3	760	16960	16960	38.05	75.71	-0.406	4	1.56	P12931	PF07714	Pkinase Tyr	250	28537.2	7.01	31	31	4023	44265	43890	41.6	86.96	-0.204	4
P22681	PF02761	Cbl_N2	84	9796.25	8.14	9	10	1378	23490	23490	23.32	84.88	-0.079	4	1.97	Q9BX66	PF07653	SH3_2	54	6435.4	8.62	7	8	914	11460	0	18.5	88.52	-0.585	2
P22681	PF02262	Cbl_N	125	14848.5	9.46	15	22	2117	13075	12950	31.71	84.96	-0.525	4	1.97	Q9BX66	PF07653	SH3_2	54	6435.4	8.62	7	8	914	11460	0	18.5	88.52	-0.585	2
P22681	PF02762	Cbl_N3	86	9890.32	8.85	7	9	1387	12950	12950	46.45	80.58	-0.307	4	1.97	Q9BX66	PF07653	SH3_2	54	6435.4	8.62	7	8	914	11460	0	18.5	88.52	-0.585	2
P22681	PF00627	UBA	47	5272.97	4.59	5	3	742	2980	0	103.58	103.83	-0.151	4	13.57	Q9BX66	PF02208	Sorb	42	5023.63	5.59	8	7	698	6990	0	37.55	60.24	-1.188	3
Q13905	PF00617	RasGEF	171	20057.1	5.69	23	20	2842	32555	32430	53.18	101.58	-0.267	4	3.35	P56945	PF08824	Serine_rich	155	16272.3	5.76	18	13	2291	5500	5500	49.48	100.26	-0.056	2
P49023	PF03535	Paxillin	210	22031.3	4.86	22	14	3067	9970	9970	83.66	67.71	-0.634	7	4.43	Q14289	PF03623	Focal_AT	133	14625.9	5.16	18	15	2101	3105	2980	38.36	120.9	-0.042	1
O43639	PF00018	SH3 1	46	5580.22	8.34	7	8	778	24980	0	34.77	72.17	-1.113	4	1.91	P50570	PF02212	GED	92	10704.3	5.73	13	10	1508	5960	0	55.8	107.17	-0.248	1
O43639	PF00018	SH3 1	46	5580.22	8.34	7	8	778	24980	0	34.77	72.17	-1.113	4	1.91	P50570	PF01031	Dynamin_M	287	33434.4	9.22	42	49	4758	10555	10430	46.18	92.06	-0.587	5
O43639	PF00018	SH3 1	46	5580.22	8.34	7	8	778	24980	0	34.77	72.17	-1.113	4	1.93	P50570	PF00169	PH	105	12441.2	6.78	17	17	1746	27960	27960	65.31	80.76	-0.606	5
O43639	PF00017	SH2	75	8709.66	6.05	11	9	1194	11585	11460	36.95	67.47	-0.663	4	1.93	P50570	PF00169	PH	105	12441.2	6.78	17	17	1746	27960	27960	65.31	80.76	-0.606	5
Q05397	PF00373	FERM_M	125	15004.3	8.52	19	21	2128	13075	12950	48.15	86.56	-0.499	9	33.92	Q14289	PF00373	FERM_M	120	14427.7	8.53	16	18	2021	7575	7450	63.36	70.75	-0.588	4
Q14247	PF00018	SH3 1	49	5619.15	3.79	11	3	760	16960	16960	38.05	75.71	-0.406	4	1.56	P43405	PF07714	Pkinase_Tyr	256	29440	7.55	32	33	4114	55600	55350	30.88	78.83	-0.389	2
P43405	PF00017	SH2	78	8729.69	6.64	8	7	1198	8940	8940	71.17	72.69	-0.419	4	6.03	P40763	PF02864	STAT_bind	140	15747.3	8.41	16	18	2233	3230	2980	34.73	95.29	-0.236	4
P35240	PF00373	FERM_M	118	14007	4.86	21	13	1957	24410	24410	51.49	86.02	-0.482	2	8.66	O00560	PF00595	PDZ	73	7756.89	6.74	6	6	1102	0	0	32.88	104.11	0.126	3
P43405	PF00017	SH2	78	8729.69	6.64	8	7	1198	8940	8940	71.17	72.69	-0.419	4	2.39	P07948	PF07714	Pkinase Tyr	251	28617.3	6.94	32	32	4047	43110	42860	33.14	91.31	-0.131	2
P43405	PF00017	SH2	78	8729.69	6.64	8	7	1198	8940	8940	71.17	72.69	-0.419	4	1.73	P07948	PF00018	SH3 1	47	5447.29	6.91	8	8	773	13980	0	16.38	74.68	-0.681	4
P29353	PF00017	SH2	72	8197.27	7.16	8	8	1157	8480	0	36.56	91.94	-0.433	4	2.39	P07948	PF07714	Pkinase Tyr	251	28617.3	6.94	32	32	4047	43110	42860	33.14	91.31	-0.131	2
P29353	PF00017	SH2	72	8197.27	7.16	8	8	1157	8480	0	36.56	91.94	-0.433	4	1.73	P07948	PF00018	SH3 1	47	5447.29	6.91	8	8	773	13980	0	16.38	74.68	-0.681	4
P19174	PF00018	SH3 1	37	4433.95	5.1	7	6	618	13980	0	35.29	68.65	-0.916	3	4.85	Q13153	PF00786	PBD	59	6708.47	4.63	4	4	933	6990	0	51.85	77.63	-0.436	4
P19174	PF00018	SH3 1	37	4433.95	5.1	7	6	618	13980	0	35.29	68.65	-0.916	3	1.81	Q13153	PF00069	Pkinase	252	28371.6	4.83	34	23	3983	30160	29910	39.46	93.61	-0.173	4
P19174	PF00387	PI-PLC-Y	134	15558.1	9.43	14	22	2189	16180	15930	47.53	70.6	-0.613	1	1.82	P07948	PF07714	Pkinase Tyr	251	28617.3	6.94	32	32	4047	43110	42860	33.14	91.31	-0.131	2
P19174	PF00018	SH3 1	37	4433.95	5.1	7	6	618	13980	0	35.29	68.65	-0.916	3	1.56	P07948	PF07714	Pkinase Tyr	251	28617.3	6.94	32	32	4047	43110	42860	33.14	91.31	-0.131	2
P19174	PF00017	SH2	90	10381.6	6.19	12	10	1434	17085	16960	38.82	73.67	-0.412	4	2.39	P07948	PF07714	Pkinase Tyr	251	28617.3	6.94	32	32	4047	43110	42860	33.14	91.31	-0.131	2
P19174	PF00017	SH2	90	10381.6	6.19	12	10	1434	17085	16960	38.82	73.67	-0.412	4	1.73	P07948	PF00018	SH3 1	47	5447.29	6.91	8	8	773	13980	0	16.38	74.68	-0.681	4
P19174	PF00387	PI-PLC-Y	134	15558.1	9.43	14	22	2189	16180	15930	47.53	70.6	-0.613	1	1.82	Q05397	PF07714	Pkinase_Tyr	255	29112.9	8.73	26	31	4095	42900	42400	57.74	88.31	-0.132	2
P19174	PF00018	SH3 1	37	4433.95	5.1	7	6	618	13980	0	35.29	68.65	-0.916	3	1.56	Q05397	PF07714	Pkinase_Tyr	255	29112.9	8.73	26	31	4095	42900	42400	57.74	88.31	-0.132	2
P19174	PF00017	SH2	90	10381.6	6.19	12	10	1434	17085	16960	38.82	73.67	-0.412	4	2.39	Q05397	PF07714	Pkinase_Tyr	255	29112.9	8.73	26	31	4095	42900	42400	57.74	88.31	-0.132	2
P19174	PF00018	SH3 1	37	4433.95	5.1	7	6	618	13980	0	35.29	68.65	-0.916	3	3.73	P29353	PF00640	PID	157	17268.9	9	13	18	2425	7825	7450	53.52	87.64	-0.078	4
P19174	PF00017	SH2	90	10381.6	6.19	12	10	1434	17085	16960	38.82	73.67	-0.412	4	4.34	P29353	PF00640	PID	157	17268.9	9	13	18	2425	7825	7450	53.52	87.64	-0.078	4
P19174	PF00387	PI-PLC-Y	134	15558.1	9.43	14	22	2189	16180	15930	47.53	70.6	-0.613	1	1.82	P06241	PF07714	Pkinase Tyr	250	28475.1	7.79	30	31	4027	42650	42400	40.14	91.68	-0.221	4
P19174	PF00018	SH3 1	37	4433.95	5.1	7	6	618	13980	0	35.29	68.65	-0.916	3	1.56	P06241	PF07714	Pkinase Tyr	250	28475.1	7.79	30	31	4027	42650	42400	40.14	91.68	-0.221	4
P19174	PF00017	SH2	90	10381.6	6.19	12	10	1434	17085	16960	38.82	73.67	-0.412	4	2.39	P06241	PF07714	Pkinase Tyr	250	28475.1	7.79	30	31	4027	42650	42400	40.14	91.68	-0.221	4
P19174	PF00017	SH2	90	10381.6	6.19	12	10	1434	17085	16960	38.82	73.67	-0.412	4	1.73	P06241	PF00018	SH3 1	48	5513.93	4.31	10	4	751	15470	0	40.5	61.04	-0.798	4
P56945	PF00018	SH3 1	49	5447.1	4.45	8	4	754	12490	12490	34.24	85.51	-0.394	3	18.95	Q96IF1	PF00412	LIM	57	6395.3	7.66	4	5	858	7950	7450	43.65	61.58	-0.002	3
P56945	PF00018	SH3 1	49	5447.1	4.45	8	4	754	12490	12490	34.24	85.51	-0.394	3	1.56	Q05397	PF07714	Pkinase_Tyr	255	29112.9	8.73	26	31	4095	42900	42400	57.74	88.31	-0.132	2
P56945	PF00018	SH3 1	49	5447.1	4.45	8	4	754	12490	12490	34.24	85.51	-0.394	3	1.56	P07948	PF07714	Pkinase Tyr	251	28617.3	6.94	32	32	4047	43110	42860	33.14	91.31	-0.131	2
P56945	PF00018	SH3 1	49	5447.1	4.45	8	4	754	12490	12490	34.24	85.51	-0.394	3	1.56	P06241	PF07714	Pkinase Tyr	250	28475.1	7.79	30	31	4027	42650	42400	40.14	91.68	-0.221	4
P56945	PF00018	SH3 1	49	5447.1	4.45	8	4	754	12490	12490	34.24	85.51	-0.394	3	1.55	P18433	PF00102	Y_phosphatase	236	27345.5	8.62	24	28	3815	44265	43890	22	76.69	-0.289	2
P56945	PF00018	SH3 1	49	5447.1	4.45	8	4	754	12490	12490	34.24	85.51	-0.394	3	1.56	P12931	PF07714	Pkinase Tyr	250	28537.2	7.01	31	31	4023	44265	43890	41.6	86.96	-0.204	4
P56945	PF00018	SH3 1	49	5447.1	4.45	8	4	754	12490	12490	34.24	85.51	-0.394	3	3.12	Q13905	PF00617	RasGEF	171	20057.1	5.69	23	20	2842	32555	32430	53.18	101.58	-0.267	4
P56945	PF00018	SH3 1	49	5447.1	4.45	8	4	754	12490	12490	34.24	85.51	-0.394	3	3.2	Q13905	PF00618	RasGEF_N	117	13651	6.8	18	18	1966	6085	5960	36.52	116.5	0.107	5
P56945	PF00018	SH3 1	49	5447.1	4.45	8	4	754	12490	12490	34.24	85.51	-0.394	3	1.55	Q05209	PF00102	Y_phosphatase	235	27666.7	6.72	30	29	3854	47245	46870	31.03	79.66	-0.411	4
P56945	PF00018	SH3 1	49	5447.1	4.45	8	4	754	12490	12490	34.24	85.51	-0.394	3	1.56	P12931	PF07714	Pkinase Tyr	250	28537.2	7.01	31	31	4023	44265	43890	41.6	86.96	-0.204	4
P56945	PF00018	SH3 1	49	5447.1	4.45	8	4	754	12490	12490	34.24	85.51	-0.394	3	14.31	Q9HBL0	PF08416	PTB	137	14914	8.54	12	14	2091	7115	6990	37.96	75.55	-0.185	5
P17252	PF00168	C2	107	12484.4	9.56	14	19	1765	24980	0	30.69	70.09	-0.824	4	2.05	Q13480	PF00169	PH	111	13222.3	8.83	16	20	1860	29700	29450	58.48	85.14	-0.5	9
P17252	PF00130	C1_1	53	6193.25	8.82	2	6	841	5875	5500	48.92	40.38	0.134	2	1.94	Q13480	PF00169	PH	111	13222.3	8.83	16	20	1860	29700	29450	58.48	85.14	-0.5	9
P17252	PF00069	Pkinase	259	29537.2	5.41	38	29	4135	29255	28880	31.95	85.02	-0.132	2	1.6	Q13480	PF00169	PH	111	13222.3	8.83	16	20	1860	29700	29450	58.48	85.14	-0.5	9
P17252	PF00069	Pkinase	259	29537.2	5.41	38	29	4135	29255	28880	31.95	85.02	-0.132	2	4.86	P29353	PF00640	PID	157	17268.9	9	13	18	2425	7825	7450	53.52	87.64	-0.078	4
P17252	PF00130	C1_1	53	6193.25	8.82	2	6	841	5875	5500	48.92	40.38	0.134	2	1.81	P06213	PF07714	Pkinase Tyr	268	30260.9	5.82	34	30	4237	34170	33920	36.38	83.99	-0.208	2
P17252	PF00069	Pkinase	259	29537.2	5.41	38	29	4135	29255	28880	31.95	85.02	-0.132	2	1.76	P06213	PF07714	Pkinase Tyr	268	30260.9	5.82	34	30	4237	34170	33920	36.38	83.99	-0.208	2
P17252	PF00130	C1_1	53	6193.25	8.82	2	6	841	5875	5500	48.92	40.38	0.134	2	3.31	P21333	PF00307	CH	108	12579.8	9.69	10	16	1815	12615	12490	40.82	120.93	-0.118	2
P17252	PF00130	C1_1	53	6193.25	8.82	2	6	841	5875	5500	48.92	40.38	0.134	2	1.81	P12931	PF07714	Pkinase Tyr	250	28537.2	7.01	31	31	4023	44265	43890	41.6	86.96	-0.204	4
P17252	PF00069	Pkinase	259	29537.2	5.41	38	29	4135	29255	28880	31.95	85.02	-0.132	2	1.76	P12931	PF07714	Pkinase Tyr	250	28537.2	7.01	31	31	4023	44265	43890	41.6	86.96	-0.204	4
P17252	PF00168	C2	107	12484.4	9.56	14	19	1765	24980	0	30.69	70.09	-0.824	4	2.8	P50552	PF00568	WH1	110	12232.9	9.69	7	12	1693	21095	20970	40.92	66.55	-0.365	1
P17252	PF00168	C2	107	12484.4	9.56	14	19	1765	24980	0	30.69	70.09	-0.824	4	9.05	P50552	PF08776	VASP_tetra	37	4573.31	6.45	9	9	666	1490	0	88.25	107.84	-0.949	9
P43405	PF00017	SH2	78	8729.69	6.64	8	7	1198	8940	8940	71.17	72.69	-0.419	4	20.99	O60711	PF00412	LIM	56	6306.15	6.54	5	4	856	8730	8480	66.88	59.29	-0.28	3
P43405	PF00017	SH2	78	8729.69	6.64	8	7	1198	8940	8940	71.17	72.69	-0.419	4	2.39	P07948	PF07714	Pkinase Tyr	251	28617.3	6.94	32	32	4047	43110	42860	33.14	91.31	-0.131	2
P43405	PF00017	SH2	78	8729.69	6.64	8	7	1198	8940	8940	71.17	72.69	-0.419	4	1.73	P07948	PF00018	SH3 1	47	5447.29	6.91	8	8	773	13980	0	16.38	74.68	-0.681	4
P43405	PF00017	SH2	78	8729.69	6.64	8	7	1198	8940	8940	71.17	72.69	-0.419	4	2.62	P15498	PF00130	C1_1	53	6139.05	8.92	4	8	826	3355	2980	60.14	33.21	-0.63	4
P43405	PF00017	SH2	78	8729.69	6.64	8	7	1198	8940	8940	71.17	72.69	-0.419	4	3.06	P15498	PF00621	RhoGEF	173	20375.7	7.9	24	25	2890	9065	8940	34.96	98.09	-0.408	1
P43405	PF00017	SH2	78	8729.69	6.64	8	7	1198	8940	8940	71.17	72.69	-0.419	4	2.09	P15498	PF00017	SH2	75	8598.93	9.06	10	12	1222	11460	0	32.37	88.53	-0.211	2
P43405	PF00017	SH2	78	8729.69	6.64	8	7	1198	8940	8940	71.17	72.69	-0.419	4	2.61	P15498	PF00169	PH	102	12184	8.8	18	20	1711	15470	15470	41.2	73.63	-0.75	1
P43405	PF00017	SH2	78	8729.69	6.64	8	7	1198	8940	8940	71.17	72.69	-0.419	4	1.73	P15498	PF00018	SH3 1	38	4419.89	4.42	6	3	606	16500	16500	27.68	64.21	-0.703	2
P43405	PF00017	SH2	78	8729.69	6.64	8	7	1198	8940	8940	71.17	72.69	-0.419	4	1.74	P17252	PF00168	C2	107	12484.4	9.56	14	19	1765	24980	0	30.69	70.09	-0.824	4
P43405	PF00017	SH2	78	8729.69	6.64	8	7	1198	8940	8940	71.17	72.69	-0.419	4	2.62	P17252	PF00130	C1_1	53	6193.25	8.82	2	6	841	5875	5500	48.92	40.38	0.134	2
P43405	PF00017	SH2	78	8729.69	6.64	8	7	1198	8940	8940	71.17	72.69	-0.419	4	5.51	P40763	PF01017	STAT_alpha	173	20375.3	5.33	27	23	2864	15595	15470	62.53	87.86	-0.775	4
P43405	PF00017	SH2	78	8729.69	6.64	8	7	1198	8940	8940	71.17	72.69	-0.419	4	5.66	P40763	PF02865	STAT_int	119	14358.3	6.08	14	12	2006	30940	30940	71.87	91.09	-0.543	4
Q9Y490	PF01608	I_LWEQ	138	14690.7	6.82	19	19	2075	5625	5500	41.45	87.25	-0.334	5	2.92	P98161	PF01822	WSC	82	8080.11	4.4	4	1	1095	7490	6990	67.39	65.73	0.35	3
Q9Y490	PF00373	FERM_M	113	13023.8	8.78	14	17	1822	6085	5960	35.83	71.59	-0.624	4	33.92	Q14289	PF00373	FERM_M	120	14427.7	8.53	16	18	2021	7575	7450	63.36	70.75	-0.588	4
Q14289	PF03623	Focal_AT	133	14625.9	5.16	18	15	2101	3105	2980	38.36	120.9	-0.042	1	1.85	P05556	PF07965	Integrin_B_tail	89	10217.4	4.91	16	10	1378	10470	9970	51.49	43.6	-0.873	2
Q14289	PF03623	Focal_AT	133	14625.9	5.16	18	15	2101	3105	2980	38.36	120.9	-0.042	1	1.88	P05556	PF08725	Integrin_b_cyt	45	5370.23	9.11	7	9	762	8480	0	17.19	69.33	-0.8	2
Q14289	PF00373	FERM_M	120	14427.7	8.53	16	18	2021	7575	7450	63.36	70.75	-0.588	4	9.65	P05556	PF07965	Integrin_B_tail	89	10217.4	4.91	16	10	1378	10470	9970	51.49	43.6	-0.873	2
Q14289	PF00373	FERM_M	120	14427.7	8.53	16	18	2021	7575	7450	63.36	70.75	-0.588	4	10.7	P05556	PF08725	Integrin_b_cyt	45	5370.23	9.11	7	9	762	8480	0	17.19	69.33	-0.8	2
Q14289	PF00373	FERM_M	120	14427.7	8.53	16	18	2021	7575	7450	63.36	70.75	-0.588	4	6.73	P05556	PF07974	EGF_2	32	3353.81	6.14	3	3	441	375	0	18.91	36.56	-0.338	2
Q14289	PF07714	Pkinase_Tyr	255	29581.5	5.82	35	31	4171	51380	50880	52.15	96.24	-0.081	2	2.68	P05556	PF07974	EGF_2	32	3353.81	6.14	3	3	441	375	0	18.91	36.56	-0.338	2
Q14289	PF03623	Focal_AT	133	14625.9	5.16	18	15	2101	3105	2980	38.36	120.9	-0.042	1	213.06	Q05397	PF03623	Focal_AT	133	14817.3	5.68	17	15	2127	5960	0	44.65	110.75	-0.109	1
Q14289	PF03623	Focal_AT	133	14625.9	5.16	18	15	2101	3105	2980	38.36	120.9	-0.042	1	10.02	Q05397	PF07714	Pkinase_Tyr	255	29112.9	8.73	26	31	4095	42900	42400	57.74	88.31	-0.132	2
Q14289	PF00373	FERM_M	120	14427.7	8.53	16	18	2021	7575	7450	63.36	70.75	-0.588	4	33.92	Q05397	PF00373	FERM_M	125	15004.3	8.52	19	21	2128	13075	12950	48.15	86.56	-0.499	9
Q14289	PF03623	Focal_AT	133	14625.9	5.16	18	15	2101	3105	2980	38.36	120.9	-0.042	1	30.18	P56945	PF08824	Serine_rich	155	16272.3	5.76	18	13	2291	5500	5500	49.48	100.26	-0.056	2
Q14289	PF07714	Pkinase_Tyr	255	29581.5	5.82	35	31	4171	51380	50880	52.15	96.24	-0.081	2	24.69	P56945	PF08824	Serine_rich	155	16272.3	5.76	18	13	2291	5500	5500	49.48	100.26	-0.056	2
Q14289	PF03623	Focal_AT	133	14625.9	5.16	18	15	2101	3105	2980	38.36	120.9	-0.042	1	10.02	P07948	PF07714	Pkinase Tyr	251	28617.3	6.94	32	32	4047	43110	42860	33.14	91.31	-0.131	2
Q14289	PF00373	FERM_M	120	14427.7	8.53	16	18	2021	7575	7450	63.36	70.75	-0.588	4	16.12	Q9Y490	PF01608	I_LWEQ	138	14690.7	6.82	19	19	2075	5625	5500	41.45	87.25	-0.334	5
Q14289	PF00373	FERM_M	120	14427.7	8.53	16	18	2021	7575	7450	63.36	70.75	-0.588	4	17.5	Q9Y490	PF08913	VBS	125	13322.1	6.87	14	14	1873	4595	4470	44.05	84.4	-0.255	5
Q14289	PF00373	FERM_M	120	14427.7	8.53	16	18	2021	7575	7450	63.36	70.75	-0.588	4	17.5	Q9Y490	PF09141	Talin_middle	162	16554.4	4.68	18	11	2319	6990	6990	38.28	88.77	-0.16	3
Q14289	PF00373	FERM_M	120	14427.7	8.53	16	18	2021	7575	7450	63.36	70.75	-0.588	4	33.92	Q9Y490	PF00373	FERM_M	113	13023.8	8.78	14	17	1822	6085	5960	35.83	71.59	-0.624	4
P12931	PF00018	SH3 1	48	5477.99	4.7	7	4	756	15470	0	24.9	73.13	-0.669	2	18.95	Q15654	PF00412	LIM	58	6176.04	6.04	6	5	836	4845	4470	27.93	75.52	0.333	4
P12931	PF00017	SH2	83	9661.92	9.56	8	13	1357	14440	14440	40.91	75.18	-0.583	2	20.99	Q15654	PF00412	LIM	58	6176.04	6.04	6	5	836	4845	4470	27.93	75.52	0.333	4
P12931	PF00018	SH3 1	48	5477.99	4.7	7	4	756	15470	0	24.9	73.13	-0.669	2	1.56	P41240	PF07714	Pkinase_Tyr	246	27472.8	7.75	31	32	3885	35660	35410	32.98	92.68	-0.14	4
P12931	PF00017	SH2	83	9661.92	9.56	8	13	1357	14440	14440	40.91	75.18	-0.583	2	2.39	P41240	PF07714	Pkinase_Tyr	246	27472.8	7.75	31	32	3885	35660	35410	32.98	92.68	-0.14	4
P12931	PF00017	SH2	83	9661.92	9.56	8	13	1357	14440	14440	40.91	75.18	-0.583	2	1.73	P41240	PF00018	SH3 1	48	5318.14	8.9	5	7	756	8480	8480	14.35	83.33	-0.315	4
P12931	PF00018	SH3 1	48	5477.99	4.7	7	4	756	15470	0	24.9	73.13	-0.669	2	18.95	O60711	PF00412	LIM	56	6306.15	6.54	5	4	856	8730	8480	66.88	59.29	-0.28	3
P12931	PF00017	SH2	83	9661.92	9.56	8	13	1357	14440	14440	40.91	75.18	-0.583	2	20.99	O60711	PF00412	LIM	56	6306.15	6.54	5	4	856	8730	8480	66.88	59.29	-0.28	3
P12931	PF00017	SH2	83	9661.92	9.56	8	13	1357	14440	14440	40.91	75.18	-0.583	2	2.75	Q03135	PF01146	Caveolin	134	15521	5.64	15	11	2198	31065	30940	23.41	110.52	0.383	9
P12931	PF00017	SH2	83	9661.92	9.56	8	13	1357	14440	14440	40.91	75.18	-0.583	2	2.57	Q14247	PF02218	HS1_rep	36	3958.35	6.92	5	5	539	2980	2980	24.24	45.83	-0.931	5
P12931	PF00018	SH3 1	48	5477.99	4.7	7	4	756	15470	0	24.9	73.13	-0.669	2	40.28	Q14247	PF02218	HS1_rep	36	3958.35	6.92	5	5	539	2980	2980	24.24	45.83	-0.931	5
P12931	PF00017	SH2	83	9661.92	9.56	8	13	1357	14440	14440	40.91	75.18	-0.583	2	1.73	Q14247	PF00018	SH3 1	49	5619.15	3.79	11	3	760	16960	16960	38.05	75.71	-0.406	4
P12931	PF00018	SH3 1	48	5477.99	4.7	7	4	756	15470	0	24.9	73.13	-0.669	2	5.45	P98161	PF01822	WSC	82	8080.11	4.4	4	1	1095	7490	6990	67.39	65.73	0.35	3
P12931	PF00018	SH3 1	48	5477.99	4.7	7	4	756	15470	0	24.9	73.13	-0.669	2	2.25	Q13009	PF00621	RhoGEF	189	21958.5	6	28	25	3135	12045	11920	24.47	101.59	-0.166	9
P12931	PF00017	SH2	83	9661.92	9.56	8	13	1357	14440	14440	40.91	75.18	-0.583	2	3.06	Q13009	PF00621	RhoGEF	189	21958.5	6	28	25	3135	12045	11920	24.47	101.59	-0.166	9
P12931	PF00018	SH3 1	48	5477.99	4.7	7	4	756	15470	0	24.9	73.13	-0.669	2	1.93	Q13009	PF00169	PH	133	15041.5	9.05	16	20	2136	19605	19480	38.48	90.9	-0.204	9
P12931	PF00017	SH2	83	9661.92	9.56	8	13	1357	14440	14440	40.91	75.18	-0.583	2	2.61	Q13009	PF00169	PH	133	15041.5	9.05	16	20	2136	19605	19480	38.48	90.9	-0.204	9
P12931	PF00018	SH3 1	48	5477.99	4.7	7	4	756	15470	0	24.9	73.13	-0.669	2	1.56	Q14289	PF07714	Pkinase_Tyr	255	29581.5	5.82	35	31	4171	51380	50880	52.15	96.24	-0.081	2
P12931	PF00017	SH2	83	9661.92	9.56	8	13	1357	14440	14440	40.91	75.18	-0.583	2	2.39	Q14289	PF07714	Pkinase_Tyr	255	29581.5	5.82	35	31	4171	51380	50880	52.15	96.24	-0.081	2
P12931	PF00017	SH2	83	9661.92	9.56	8	13	1357	14440	14440	40.91	75.18	-0.583	2	5.51	P40763	PF01017	STAT_alpha	173	20375.3	5.33	27	23	2864	15595	15470	62.53	87.86	-0.775	4
P12931	PF00017	SH2	83	9661.92	9.56	8	13	1357	14440	14440	40.91	75.18	-0.583	2	5.66	P40763	PF02865	STAT_int	119	14358.3	6.08	14	12	2006	30940	30940	71.87	91.09	-0.543	4
P12931	PF00017	SH2	83	9661.92	9.56	8	13	1357	14440	14440	40.91	75.18	-0.583	2	6.03	P40763	PF02864	STAT_bind	140	15747.3	8.41	16	18	2233	3230	2980	34.73	95.29	-0.236	4
P12931	PF00018	SH3 1	48	5477.99	4.7	7	4	756	15470	0	24.9	73.13	-0.669	2	1.55	P18031	PF00102	Y_phosphatase	237	27615.7	6.73	32	31	3868	34170	33920	37.5	81.39	-0.47	2
P12931	PF00017	SH2	83	9661.92	9.56	8	13	1357	14440	14440	40.91	75.18	-0.583	2	2.84	P18031	PF00102	Y_phosphatase	237	27615.7	6.73	32	31	3868	34170	33920	37.5	81.39	-0.47	2
P12931	PF00018	SH3 1	48	5477.99	4.7	7	4	756	15470	0	24.9	73.13	-0.669	2	1.56	Q05397	PF07714	Pkinase_Tyr	255	29112.9	8.73	26	31	4095	42900	42400	57.74	88.31	-0.132	2
P12931	PF00017	SH2	83	9661.92	9.56	8	13	1357	14440	14440	40.91	75.18	-0.583	2	2.39	Q05397	PF07714	Pkinase_Tyr	255	29112.9	8.73	26	31	4095	42900	42400	57.74	88.31	-0.132	2
P12931	PF07714	Pkinase Tyr	250	28537.2	7.01	31	31	4023	44265	43890	41.6	86.96	-0.204	4	24.69	P56945	PF08824	Serine_rich	155	16272.3	5.76	18	13	2291	5500	5500	49.48	100.26	-0.056	2
P12931	PF00017	SH2	83	9661.92	9.56	8	13	1357	14440	14440	40.91	75.18	-0.583	2	24.78	P56945	PF08824	Serine_rich	155	16272.3	5.76	18	13	2291	5500	5500	49.48	100.26	-0.056	2
P12931	PF00018	SH3 1	48	5477.99	4.7	7	4	756	15470	0	24.9	73.13	-0.669	2	27.54	P56945	PF08824	Serine_rich	155	16272.3	5.76	18	13	2291	5500	5500	49.48	100.26	-0.056	2
P12931	PF00017	SH2	83	9661.92	9.56	8	13	1357	14440	14440	40.91	75.18	-0.583	2	1.73	P56945	PF00018	SH3 1	49	5447.1	4.45	8	4	754	12490	12490	34.24	85.51	-0.394	3
Q07889	PF00621	RhoGEF	178	20431.3	4.78	31	17	2877	10555	10430	54.63	102.42	-0.19	1	2.17	P46108	PF07653	SH3_2	57	6453.43	9.36	6	9	918	8480	8480	29.38	90.53	-0.374	1
Q07889	PF00169	PH	119	13731.6	6.1	18	16	1903	15720	15470	21.33	73.03	-0.555	1	1.77	P46108	PF07653	SH3_2	57	6453.43	9.36	6	9	918	8480	8480	29.38	90.53	-0.374	1
Q07889	PF00169	PH	119	13731.6	6.1	18	16	1903	15720	15470	21.33	73.03	-0.555	1	5.69	Q8IZP0	PF07815	Abi_HHR	78	8855.19	10.34	7	15	1267	8480	0	33.51	83.72	-0.771	4
Q07889	PF00621	RhoGEF	178	20431.3	4.78	31	17	2877	10555	10430	54.63	102.42	-0.19	1	2.17	P46109	PF07653	SH3_2	56	6306.4	9.65	5	9	902	6990	6990	18.33	88.75	-0.096	1
Q07889	PF00169	PH	119	13731.6	6.1	18	16	1903	15720	15470	21.33	73.03	-0.555	1	1.77	P46109	PF07653	SH3_2	56	6306.4	9.65	5	9	902	6990	6990	18.33	88.75	-0.096	1
Q07889	PF00169	PH	119	13731.6	6.1	18	16	1903	15720	15470	21.33	73.03	-0.555	1	7.89	P05556	PF00362	Integrin_beta	245	27247.8	4.91	28	19	3796	23630	23380	40.36	86.69	-0.173	2
Q07889	PF00169	PH	119	13731.6	6.1	18	16	1903	15720	15470	21.33	73.03	-0.555	1	7.98	P05556	PF07965	Integrin_B_tail	89	10217.4	4.91	16	10	1378	10470	9970	51.49	43.6	-0.873	2
Q07889	PF00169	PH	119	13731.6	6.1	18	16	1903	15720	15470	21.33	73.03	-0.555	1	8.08	P05556	PF08725	Integrin_b_cyt	45	5370.23	9.11	7	9	762	8480	0	17.19	69.33	-0.8	2
Q07889	PF00169	PH	119	13731.6	6.1	18	16	1903	15720	15470	21.33	73.03	-0.555	1	13.02	P05556	PF07974	EGF_2	32	3353.81	6.14	3	3	441	375	0	18.91	36.56	-0.338	2
Q07889	PF00169	PH	119	13731.6	6.1	18	16	1903	15720	15470	21.33	73.03	-0.555	1	1.63	P06241	PF07714	Pkinase Tyr	250	28475.1	7.79	30	31	4027	42650	42400	40.14	91.68	-0.221	4
P07948	PF00018	SH3 1	47	5447.29	6.91	8	8	773	13980	0	16.38	74.68	-0.681	4	1.56	P12931	PF07714	Pkinase Tyr	250	28537.2	7.01	31	31	4023	44265	43890	41.6	86.96	-0.204	4
P07948	PF00017	SH2	83	9537.89	8.83	10	12	1340	11460	11460	35.15	81.08	-0.351	4	2.39	P12931	PF07714	Pkinase Tyr	250	28537.2	7.01	31	31	4023	44265	43890	41.6	86.96	-0.204	4
P07948	PF00017	SH2	83	9537.89	8.83	10	12	1340	11460	11460	35.15	81.08	-0.351	4	1.73	P12931	PF00018	SH3 1	48	5477.99	4.7	7	4	756	15470	0	24.9	73.13	-0.669	2
P07948	PF00017	SH2	83	9537.89	8.83	10	12	1340	11460	11460	35.15	81.08	-0.351	4	1.74	P17252	PF00168	C2	107	12484.4	9.56	14	19	1765	24980	0	30.69	70.09	-0.824	4
P07948	PF00018	SH3 1	47	5447.29	6.91	8	8	773	13980	0	16.38	74.68	-0.681	4	2.05	P17252	PF00130	C1_1	53	6193.25	8.82	2	6	841	5875	5500	48.92	40.38	0.134	2
P07948	PF00017	SH2	83	9537.89	8.83	10	12	1340	11460	11460	35.15	81.08	-0.351	4	2.62	P17252	PF00130	C1_1	53	6193.25	8.82	2	6	841	5875	5500	48.92	40.38	0.134	2
P07948	PF00018	SH3 1	47	5447.29	6.91	8	8	773	13980	0	16.38	74.68	-0.681	4	1.81	P17252	PF00069	Pkinase	259	29537.2	5.41	38	29	4135	29255	28880	31.95	85.02	-0.132	2
P07948	PF00018	SH3 1	47	5447.29	6.91	8	8	773	13980	0	16.38	74.68	-0.681	4	1.53	P19174	PF00387	PI-PLC-Y	134	15558.1	9.43	14	22	2189	16180	15930	47.53	70.6	-0.613	1
P07948	PF00017	SH2	83	9537.89	8.83	10	12	1340	11460	11460	35.15	81.08	-0.351	4	2.78	P19174	PF00388	PI-PLC-X	144	16350.8	7.7	15	16	2287	20190	19940	49.06	84.65	-0.327	4
P07948	PF00017	SH2	83	9537.89	8.83	10	12	1340	11460	11460	35.15	81.08	-0.351	4	3.04	P19174	PF00387	PI-PLC-Y	134	15558.1	9.43	14	22	2189	16180	15930	47.53	70.6	-0.613	1
P07948	PF00017	SH2	83	9537.89	8.83	10	12	1340	11460	11460	35.15	81.08	-0.351	4	1.74	P19174	PF00168	C2	106	11892.7	6.12	12	11	1675	10095	9970	36.59	82.74	-0.049	4
P07948	PF00017	SH2	83	9537.89	8.83	10	12	1340	11460	11460	35.15	81.08	-0.351	4	1.73	P19174	PF00018	SH3 1	37	4433.95	5.1	7	6	618	13980	0	35.29	68.65	-0.916	3
P07948	PF00018	SH3 1	47	5447.29	6.91	8	8	773	13980	0	16.38	74.68	-0.681	4	1.56	P43405	PF07714	Pkinase_Tyr	256	29440	7.55	32	33	4114	55600	55350	30.88	78.83	-0.389	2
P07948	PF00017	SH2	83	9537.89	8.83	10	12	1340	11460	11460	35.15	81.08	-0.351	4	2.39	P43405	PF07714	Pkinase_Tyr	256	29440	7.55	32	33	4114	55600	55350	30.88	78.83	-0.389	2
P07948	PF00018	SH3 1	47	5447.29	6.91	8	8	773	13980	0	16.38	74.68	-0.681	4	1.56	P41240	PF07714	Pkinase_Tyr	246	27472.8	7.75	31	32	3885	35660	35410	32.98	92.68	-0.14	4
P07948	PF00017	SH2	83	9537.89	8.83	10	12	1340	11460	11460	35.15	81.08	-0.351	4	2.39	P41240	PF00017	SH2	75	8961.13	5.2	12	7	1237	16055	15930	32.37	79.2	-0.469	4
P07948	PF00017	SH2	83	9537.89	8.83	10	12	1340	11460	11460	35.15	81.08	-0.351	4	1.73	P41240	PF00018	SH3 1	48	5318.14	8.9	5	7	756	8480	8480	14.35	83.33	-0.315	4
P07948	PF00018	SH3 1	47	5447.29	6.91	8	8	773	13980	0	16.38	74.68	-0.681	4	3.73	P29353	PF00640	PID	157	17268.9	9	13	18	2425	7825	7450	53.52	87.64	-0.078	4
P07948	PF00017	SH2	83	9537.89	8.83	10	12	1340	11460	11460	35.15	81.08	-0.351	4	4.34	P29353	PF00640	PID	157	17268.9	9	13	18	2425	7825	7450	53.52	87.64	-0.078	4
P46108	PF00018	SH3 1	47	5563.16	4.58	12	8	768	11000	0	61.27	60.21	-1.183	1	3.12	Q07889	PF00617	RasGEF	190	22157.5	6.09	27	24	3159	18575	18450	60.26	104.58	-0.316	1
P46108	PF00018	SH3 1	47	5563.16	4.58	12	8	768	11000	0	61.27	60.21	-1.183	1	3.2	Q07889	PF00618	RasGEF_N	118	14275.4	5.82	19	16	2014	14565	14440	51.21	92.54	-0.388	1
P46108	PF00017	SH2	92	10174.4	6.94	8	8	1423	16960	0	87.65	80.43	-0.423	2	3.3	Q07889	PF00617	RasGEF	190	22157.5	6.09	27	24	3159	18575	18450	60.26	104.58	-0.316	1
P46108	PF00017	SH2	92	10174.4	6.94	8	8	1423	16960	0	87.65	80.43	-0.423	2	3.44	Q07889	PF00618	RasGEF_N	118	14275.4	5.82	19	16	2014	14565	14440	51.21	92.54	-0.388	1
P46108	PF00018	SH3 1	47	5563.16	4.58	12	8	768	11000	0	61.27	60.21	-1.183	1	2.25	Q07889	PF00621	RhoGEF	178	20431.3	4.78	31	17	2877	10555	10430	54.63	102.42	-0.19	1
P46108	PF00017	SH2	92	10174.4	6.94	8	8	1423	16960	0	87.65	80.43	-0.423	2	3.06	Q07889	PF00621	RhoGEF	178	20431.3	4.78	31	17	2877	10555	10430	54.63	102.42	-0.19	1
P46108	PF00018	SH3 1	47	5563.16	4.58	12	8	768	11000	0	61.27	60.21	-1.183	1	1.93	Q07889	PF00169	PH	119	13731.6	6.1	18	16	1903	15720	15470	21.33	73.03	-0.555	1
P46108	PF00017	SH2	92	10174.4	6.94	8	8	1423	16960	0	87.65	80.43	-0.423	2	2.61	Q07889	PF00169	PH	119	13731.6	6.1	18	16	1903	15720	15470	21.33	73.03	-0.555	1
P46108	PF00018	SH3 1	47	5563.16	4.58	12	8	768	11000	0	61.27	60.21	-1.183	1	40.28	Q14247	PF02218	HS1_rep	36	3958.35	6.92	5	5	539	2980	2980	24.24	45.83	-0.931	5
P46108	PF00017	SH2	92	10174.4	6.94	8	8	1423	16960	0	87.65	80.43	-0.423	2	2.57	Q14247	PF02218	HS1_rep	36	3958.35	6.92	5	5	539	2980	2980	24.24	45.83	-0.931	5
P46108	PF00017	SH2	92	10174.4	6.94	8	8	1423	16960	0	87.65	80.43	-0.423	2	1.73	Q14247	PF00018	SH3 1	49	5619.15	3.79	11	3	760	16960	16960	38.05	75.71	-0.406	4
P46108	PF00018	SH3 1	47	5563.16	4.58	12	8	768	11000	0	61.27	60.21	-1.183	1	2.83	P22681	PF00627	UBA	47	5272.97	4.59	5	3	742	2980	0	103.58	103.83	-0.151	4
P46108	PF00018	SH3 1	47	5563.16	4.58	12	8	768	11000	0	61.27	60.21	-1.183	1	9.54	P22681	PF02262	Cbl_N	125	14848.5	9.46	15	22	2117	13075	12950	31.71	84.96	-0.525	4
P46108	PF00018	SH3 1	47	5563.16	4.58	12	8	768	11000	0	61.27	60.21	-1.183	1	9.54	P22681	PF02761	Cbl_N2	84	9796.25	8.14	9	10	1378	23490	23490	23.32	84.88	-0.079	4
P46108	PF00018	SH3 1	47	5563.16	4.58	12	8	768	11000	0	61.27	60.21	-1.183	1	9.54	P22681	PF02262	Cbl_N	125	14848.5	9.46	15	22	2117	13075	12950	31.71	84.96	-0.525	4
P46108	PF00017	SH2	92	10174.4	6.94	8	8	1423	16960	0	87.65	80.43	-0.423	2	5.21	P22681	PF02262	Cbl_N	125	14848.5	9.46	15	22	2117	13075	12950	31.71	84.96	-0.525	4
P46108	PF00017	SH2	92	10174.4	6.94	8	8	1423	16960	0	87.65	80.43	-0.423	2	5.21	P22681	PF02761	Cbl_N2	84	9796.25	8.14	9	10	1378	23490	23490	23.32	84.88	-0.079	4
P46108	PF00017	SH2	92	10174.4	6.94	8	8	1423	16960	0	87.65	80.43	-0.423	2	5.21	P22681	PF02262	Cbl_N	125	14848.5	9.46	15	22	2117	13075	12950	31.71	84.96	-0.525	4
P46108	PF00018	SH3 1	47	5563.16	4.58	12	8	768	11000	0	61.27	60.21	-1.183	1	1.55	Q06124	PF00102	Y_phosphatase	252	29018.1	7.8	32	33	4054	37150	36900	35.25	78.77	-0.515	4
P46108	PF00017	SH2	92	10174.4	6.94	8	8	1423	16960	0	87.65	80.43	-0.423	2	2.84	Q06124	PF00102	Y_phosphatase	252	29018.1	7.8	32	33	4054	37150	36900	35.25	78.77	-0.515	4
Q14185	PF00018	SH3 1	51	5943.67	8.27	6	7	830	14440	0	34.73	74.71	-0.59	4	2.72	P46108	PF07653	SH3_2	57	6453.43	9.36	6	9	918	8480	8480	29.38	90.53	-0.374	1
P10586	PF00102	Y_phosphatase	232	26607.5	7.77	26	27	3705	40255	39880	36.26	77.28	-0.331	2	3.22	O75962	PF00435	Spectrin	107	12502.1	5.8	12	8	1722	15470	15470	60.38	78.5	-0.393	4
P10586	PF00102	Y_phosphatase	232	26607.5	7.77	26	27	3705	40255	39880	36.26	77.28	-0.331	2	4.1	O75962	PF07679	I-set	92	9835.01	4.77	12	7	1363	10220	9970	23.21	84.67	-0.103	4
P10586	PF00102	Y_phosphatase	232	26607.5	7.77	26	27	3705	40255	39880	36.26	77.28	-0.331	2	3.01	O75962	PF00169	PH	112	13041	8.73	16	18	1855	19480	19480	51.76	88.66	-0.476	4
P10586	PF00041	fn3	82	8715.64	4.56	8	5	1215	12950	0	34.9	73.66	-0.165	2	1.97	O75962	PF07679	I-set	92	9835.01	4.77	12	7	1363	10220	9970	23.21	84.67	-0.103	4
P10586	PF07679	I-set	102	11153.7	5.15	14	12	1575	7115	6990	43.39	81.18	-0.307	2	10.46	O75962	PF07679	I-set	92	9835.01	4.77	12	7	1363	10220	9970	23.21	84.67	-0.103	4
P10586	PF00041	fn3	82	8715.64	4.56	8	5	1215	12950	0	34.9	73.66	-0.165	2	1.59	O75962	PF00069	Pkinase	255	28521.9	5.57	33	27	4052	27305	26930	39.45	105.1	-0.019	1
P10586	PF00041	fn3	82	8715.64	4.56	8	5	1215	12950	0	34.9	73.66	-0.165	2	2.74	O75962	PF00169	PH	112	13041	8.73	16	18	1855	19480	19480	51.76	88.66	-0.476	4
P10586	PF00041	fn3	82	8715.64	4.56	8	5	1215	12950	0	34.9	73.66	-0.165	2	2.28	Q13136	PF07647	SAM_2	71	8008.21	4.8	8	5	1148	12490	0	31.24	134.65	0.308	10
P10586	PF00041	fn3	82	8715.64	4.56	8	5	1215	12950	0	34.9	73.66	-0.165	2	5.87	Q13136	PF00536	SAM_1	66	7373.63	6.81	6	6	1050	23490	23490	44.84	115.3	0.244	7
P10586	PF00102	Y_phosphatase	232	26607.5	7.77	26	27	3705	40255	39880	36.26	77.28	-0.331	2	76.66	Q03135	PF01146	Caveolin	134	15521	5.64	15	11	2198	31065	30940	23.41	110.52	0.383	9
P10586	PF00041	fn3	82	8715.64	4.56	8	5	1215	12950	0	34.9	73.66	-0.165	2	9.41	Q03135	PF01146	Caveolin	134	15521	5.64	15	11	2198	31065	30940	23.41	110.52	0.383	9
Q06124	PF00102	Y_phosphatase	252	29018.1	7.8	32	33	4054	37150	36900	35.25	78.77	-0.515	4	2.23	Q15052	PF00307	CH	112	12408.3	4.44	17	10	1753	7240	6990	41.91	103.48	0.016	3
Q06124	PF00017	SH2	76	8494.49	6.07	8	7	1186	12950	0	25.9	82.11	-0.346	4	3.06	Q15052	PF00621	RhoGEF	175	19889.8	5.17	21	12	2780	7825	7450	49.09	92.46	-0.223	1
Q06124	PF00102	Y_phosphatase	252	29018.1	7.8	32	33	4054	37150	36900	35.25	78.77	-0.515	4	3.01	Q15052	PF00169	PH	106	12191	4.75	14	9	1703	10095	9970	36.72	97.36	-0.078	3
Q06124	PF00017	SH2	76	8494.49	6.07	8	7	1186	12950	0	25.9	82.11	-0.346	4	2.09	Q15052	PF00307	CH	112	12408.3	4.44	17	10	1753	7240	6990	41.91	103.48	0.016	3
Q06124	PF00017	SH2	76	8494.49	6.07	8	7	1186	12950	0	25.9	82.11	-0.346	4	2.61	Q15052	PF00169	PH	106	12191	4.75	14	9	1703	10095	9970	36.72	97.36	-0.078	3
Q06124	PF00017	SH2	76	8494.49	6.07	8	7	1186	12950	0	25.9	82.11	-0.346	4	1.73	Q15052	PF00018	SH3 1	49	5727.23	5.15	7	6	785	19480	19480	21.43	57.55	-0.722	4
Q06124	PF00017	SH2	76	8494.49	6.07	8	7	1186	12950	0	25.9	82.11	-0.346	4	20.99	O60711	PF00412	LIM	56	6306.15	6.54	5	4	856	8730	8480	66.88	59.29	-0.28	3
Q06124	PF00017	SH2	76	8494.49	6.07	8	7	1186	12950	0	25.9	82.11	-0.346	4	5.51	P40763	PF01017	STAT_alpha	173	20375.3	5.33	27	23	2864	15595	15470	62.53	87.86	-0.775	4
Q06124	PF00017	SH2	76	8494.49	6.07	8	7	1186	12950	0	25.9	82.11	-0.346	4	5.66	P40763	PF02865	STAT_int	119	14358.3	6.08	14	12	2006	30940	30940	71.87	91.09	-0.543	4
Q06124	PF00017	SH2	76	8494.49	6.07	8	7	1186	12950	0	25.9	82.11	-0.346	4	6.03	P40763	PF02864	STAT_bind	140	15747.3	8.41	16	18	2233	3230	2980	34.73	95.29	-0.236	4
Q06124	PF00102	Y_phosphatase	252	29018.1	7.8	32	33	4054	37150	36900	35.25	78.77	-0.515	4	6.17	Q05397	PF00373	FERM_M	125	15004.3	8.52	19	21	2128	13075	12950	48.15	86.56	-0.499	9
Q06124	PF00017	SH2	76	8494.49	6.07	8	7	1186	12950	0	25.9	82.11	-0.346	4	2	Q05397	PF07714	Pkinase_Tyr	255	29112.9	8.73	26	31	4095	42900	42400	57.74	88.31	-0.132	2	1
Q06124	PF00017	SH2	76	8494.49	6.07	8	7	1186	12950	0	25.9	82.11	-0.346	4	2.39	Q05397	PF07714	Pkinase_Tyr	255	29112.9	8.73	26	31	4095	42900	42400	57.74	88.31	-0.132	2
Q06124	PF00017	SH2	76	8494.49	6.07	8	7	1186	12950	0	25.9	82.11	-0.346	4	1.73	P62993	PF00018	SH3 1	47	5438.11	4.85	10	8	760	8480	8480	23.19	72.77	-0.8	2
Q06124	PF00102	Y_phosphatase	252	29018.1	7.8	32	33	4054	37150	36900	35.25	78.77	-0.515	4	3.01	Q13480	PF00169	PH	111	13222.3	8.83	16	20	1860	29700	29450	58.48	85.14	-0.5	9
Q06124	PF00017	SH2	76	8494.49	6.07	8	7	1186	12950	0	25.9	82.11	-0.346	4	2.61	Q13480	PF00169	PH	111	13222.3	8.83	16	20	1860	29700	29450	58.48	85.14	-0.5	9
Q06124	PF00102	Y_phosphatase	252	29018.1	7.8	32	33	4054	37150	36900	35.25	78.77	-0.515	4	2	P06241	PF07714	Pkinase Tyr	250	28475.1	7.79	30	31	4027	42650	42400	40.14	91.68	-0.221	4
Q06124	PF00017	SH2	76	8494.49	6.07	8	7	1186	12950	0	25.9	82.11	-0.346	4	2.39	P06241	PF00017	SH2	73	8604.71	9.69	9	14	1203	18450	0	11.16	61.51	-0.918	4
Q06124	PF00017	SH2	76	8494.49	6.07	8	7	1186	12950	0	25.9	82.11	-0.346	4	1.73	P06241	PF00018	SH3 1	48	5513.93	4.31	10	4	751	15470	0	40.5	61.04	-0.798	4
P21333	PF00307	CH	108	12579.8	9.69	10	16	1815	12615	12490	40.82	120.93	-0.118	2	11.32	P17252	PF00435	Spectrin	107	12502.1	5.8	12	8	1722	15470	15470	60.38	78.5	-0.393	4
P21333	PF00307	CH	108	12579.8	9.69	10	16	1815	12615	12490	40.82	120.93	-0.118	2	2.77	P17252	PF00621	RhoGEF	173	20152.2	4.9	28	18	2823	24660	24410	37.54	91.27	-0.309	4
P21333	PF00630	Filamin	94	10355.7	8.97	11	13	1456	9970	0	39.54	64.26	-0.627	5	113.89	P05556	PF07965	Integrin_B_tail	89	10217.4	4.91	16	10	1378	10470	9970	51.49	43.6	-0.873	2
P21333	PF00630	Filamin	94	10355.7	8.97	11	13	1456	9970	0	39.54	64.26	-0.627	5	126.54	P05556	PF08725	Integrin_b_cyt	45	5370.23	9.11	7	9	762	8480	0	17.19	69.33	-0.8	2
P21333	PF00630	Filamin	94	10355.7	8.97	11	13	1456	9970	0	39.54	64.26	-0.627	5	81.35	P05556	PF07974	EGF_2	32	3353.81	6.14	3	3	441	375	0	18.91	36.56	-0.338	2
P21333	PF00307	CH	108	12579.8	9.69	10	16	1815	12615	12490	40.82	120.93	-0.118	2	15.89	P05556	PF00362	Integrin_beta	245	27247.8	4.91	28	19	3796	23630	23380	40.36	86.69	-0.173	2
P21333	PF00307	CH	108	12579.8	9.69	10	16	1815	12615	12490	40.82	120.93	-0.118	2	15.89	P05556	PF07965	Integrin_B_tail	89	10217.4	4.91	16	10	1378	10470	9970	51.49	43.6	-0.873	2
P21333	PF00307	CH	108	12579.8	9.69	10	16	1815	12615	12490	40.82	120.93	-0.118	2	17.65	P05556	PF08725	Integrin_b_cyt	45	5370.23	9.11	7	9	762	8480	0	17.19	69.33	-0.8	2
P21333	PF00307	CH	108	12579.8	9.69	10	16	1815	12615	12490	40.82	120.93	-0.118	2	11.35	P05556	PF07974	EGF_2	32	3353.81	6.14	3	3	441	375	0	18.91	36.56	-0.338	2
P29353	PF00017	SH2	72	8197.27	7.16	8	8	1157	8480	0	36.56	91.94	-0.433	4	2.84	Q06124	PF00102	Y_phosphatase	252	29018.1	7.8	32	33	4054	37150	36900	35.25	78.77	-0.515	4
P29353	PF00017	SH2	72	8197.27	7.16	8	8	1157	8480	0	36.56	91.94	-0.433	4	2.62	P15498	PF00130	C1_1	53	6139.05	8.92	4	8	826	3355	2980	60.14	33.21	-0.63	4
P29353	PF00017	SH2	72	8197.27	7.16	8	8	1157	8480	0	36.56	91.94	-0.433	4	3.06	P15498	PF00621	RhoGEF	173	20375.7	7.9	24	25	2890	9065	8940	34.96	98.09	-0.408	1
P29353	PF00017	SH2	72	8197.27	7.16	8	8	1157	8480	0	36.56	91.94	-0.433	4	2.09	P15498	PF00307	CH	120	13979.4	7.59	11	12	1974	23865	23490	42.88	107.25	0.141	3
P29353	PF00017	SH2	72	8197.27	7.16	8	8	1157	8480	0	36.56	91.94	-0.433	4	2.61	P15498	PF00169	PH	102	12184	8.8	18	20	1711	15470	15470	41.2	73.63	-0.75	1
P29353	PF00017	SH2	72	8197.27	7.16	8	8	1157	8480	0	36.56	91.94	-0.433	4	1.73	P15498	PF00018	SH3 1	38	4419.89	4.42	6	3	606	16500	16500	27.68	64.21	-0.703	2
P29353	PF00640	PID	157	17268.9	9	13	18	2425	7825	7450	53.52	87.64	-0.078	4	2.39	P43405	PF07714	Pkinase_Tyr	256	29440	7.55	32	33	4114	55600	55350	30.88	78.83	-0.389	2
P29353	PF00640	PID	157	17268.9	9	13	18	2425	7825	7450	53.52	87.64	-0.078	4	3.3	Q13905	PF00617	RasGEF	171	20057.1	5.69	23	20	2842	32555	32430	53.18	101.58	-0.267	4
P29353	PF00640	PID	157	17268.9	9	13	18	2425	7825	7450	53.52	87.64	-0.078	4	3.44	Q13905	PF00618	RasGEF_N	117	13651	6.8	18	18	1966	6085	5960	36.52	116.5	0.107	5
P29353	PF00017	SH2	72	8197.27	7.16	8	8	1157	8480	0	36.56	91.94	-0.433	4	2.84	P17706	PF00102	Y_phosphatase	233	26905.7	6.41	27	25	3753	37150	36900	37.32	83.61	-0.372	2
P29353	PF00017	SH2	72	8197.27	7.16	8	8	1157	8480	0	36.56	91.94	-0.433	4	2.39	P07948	PF07714	Pkinase Tyr	251	28617.3	6.94	32	32	4047	43110	42860	33.14	91.31	-0.131	2
P29353	PF00017	SH2	72	8197.27	7.16	8	8	1157	8480	0	36.56	91.94	-0.433	4	1.73	P07948	PF00018	SH3 1	47	5447.29	6.91	8	8	773	13980	0	16.38	74.68	-0.681	4
P29353	PF00017	SH2	72	8197.27	7.16	8	8	1157	8480	0	36.56	91.94	-0.433	4	2.84	Q06124	PF00102	Y_phosphatase	252	29018.1	7.8	32	33	4054	37150	36900	35.25	78.77	-0.515	4
P29353	PF00017	SH2	72	8197.27	7.16	8	8	1157	8480	0	36.56	91.94	-0.433	4	5.21	P22681	PF02262	Cbl_N	125	14848.5	9.46	15	22	2117	13075	12950	31.71	84.96	-0.525	4
P29353	PF00017	SH2	72	8197.27	7.16	8	8	1157	8480	0	36.56	91.94	-0.433	4	5.21	P22681	PF02761	Cbl_N2	84	9796.25	8.14	9	10	1378	23490	23490	23.32	84.88	-0.079	4
P29353	PF00017	SH2	72	8197.27	7.16	8	8	1157	8480	0	36.56	91.94	-0.433	4	5.21	P22681	PF02762	Cbl_N3	86	9890.32	8.85	7	9	1387	12950	12950	46.45	80.58	-0.307	4
P29353	PF00017	SH2	72	8197.27	7.16	8	8	1157	8480	0	36.56	91.94	-0.433	4	2.39	P12931	PF07714	Pkinase Tyr	250	28537.2	7.01	31	31	4023	44265	43890	41.6	86.96	-0.204	4
P29353	PF00017	SH2	72	8197.27	7.16	8	8	1157	8480	0	36.56	91.94	-0.433	4	1.73	P12931	PF00018	SH3 1	48	5477.99	4.7	7	4	756	15470	0	24.9	73.13	-0.669	2
P29353	PF00640	PID	157	17268.9	9	13	18	2425	7825	7450	53.52	87.64	-0.078	4	5.64	P06213	PF00757	Furin-like	162	18083.6	7.77	13	15	2413	20075	18450	56.85	45.68	-0.491	2
P29353	PF00640	PID	157	17268.9	9	13	18	2425	7825	7450	53.52	87.64	-0.078	4	7.58	P06213	PF01030	Recep_L_domain	113	13348.8	7.98	12	13	1915	13075	12950	36.01	124.16	0.303	2
P29353	PF00017	SH2	72	8197.27	7.16	8	8	1157	8480	0	36.56	91.94	-0.433	4	3.41	P06213	PF00757	Furin-like	162	18083.6	7.77	13	15	2413	20075	18450	56.85	45.68	-0.491	2
P29353	PF00017	SH2	72	8197.27	7.16	8	8	1157	8480	0	36.56	91.94	-0.433	4	4.21	P06213	PF01030	Recep_L_domain	113	13348.8	7.98	12	13	1915	13075	12950	36.01	124.16	0.303	2
P29353	PF00017	SH2	72	8197.27	7.16	8	8	1157	8480	0	36.56	91.94	-0.433	4	2.39	P06213	PF07714	Pkinase Tyr	268	30260.9	5.82	34	30	4237	34170	33920	36.38	83.99	-0.208	2
P06213	PF00757	Furin-like	162	18083.6	7.77	13	15	2413	20075	18450	56.85	45.68	-0.491	2	2.21	Q05397	PF07714	Pkinase_Tyr	255	29112.9	8.73	26	31	4095	42900	42400	57.74	88.31	-0.132	2
P06213	PF01030	Recep_L_domain	113	13348.8	7.98	12	13	1915	13075	12950	36.01	124.16	0.303	2	2.32	Q05397	PF07714	Pkinase_Tyr	255	29112.9	8.73	26	31	4095	42900	42400	57.74	88.31	-0.132	2
P06213	PF17870	Insulin_TMD	48	5510.55	8.01	3	4	801	5960	0	47.48	129.79	0.758	2	5.09	P29350	PF00102	Y_phosphatase	245	27781.5	6.09	27	24	3866	45630	45380	35.63	82.73	-0.459	4
P06213	PF07714	Pkinase Tyr	268	30260.9	5.82	34	30	4237	34170	33920	36.38	83.99	-0.208	2	5.09	Q06124	PF00102	Y_phosphatase	252	29018.1	7.8	32	33	4054	37150	36900	35.25	78.77	-0.515	4
P06213	PF00757	Furin-like	162	18083.6	7.77	13	15	2413	20075	18450	56.85	45.68	-0.491	2	3.08	P22681	PF02761	Cbl_N2	84	9796.25	8.14	9	10	1378	23490	23490	23.32	84.88	-0.079	4
P06213	PF00757	Furin-like	162	18083.6	7.77	13	15	2413	20075	18450	56.85	45.68	-0.491	2	3.08	P22681	PF02262	Cbl_N	125	14848.5	9.46	15	22	2117	13075	12950	31.71	84.96	-0.525	4
P06213	PF00757	Furin-like	162	18083.6	7.77	13	15	2413	20075	18450	56.85	45.68	-0.491	2	3.08	P22681	PF02762	Cbl_N3	86	9890.32	8.85	7	9	1387	12950	12950	46.45	80.58	-0.307	4
P06213	PF01030	Recep_L_domain	113	13348.8	7.98	12	13	1915	13075	12950	36.01	124.16	0.303	2	4.14	P22681	PF02761	Cbl_N2	84	9796.25	8.14	9	10	1378	23490	23490	23.32	84.88	-0.079	4
P06213	PF01030	Recep_L_domain	113	13348.8	7.98	12	13	1915	13075	12950	36.01	124.16	0.303	2	4.14	P22681	PF02262	Cbl_N	125	14848.5	9.46	15	22	2117	13075	12950	31.71	84.96	-0.525	4
P06213	PF01030	Recep_L_domain	113	13348.8	7.98	12	13	1915	13075	12950	36.01	124.16	0.303	2	4.14	P22681	PF02762	Cbl_N3	86	9890.32	8.85	7	9	1387	12950	12950	46.45	80.58	-0.307	4
P06213	PF00757	Furin-like	162	18083.6	7.77	13	15	2413	20075	18450	56.85	45.68	-0.491	2	23.79	Q14451	PF00788	RA	87	9621.83	5.81	13	9	1330	12615	12490	38.1	82.87	-0.175	4
P06213	PF00757	Furin-like	162	18083.6	7.77	13	15	2413	20075	18450	56.85	45.68	-0.491	2	53.29	Q14451	PF08947	BPS	48	5333.97	8.6	6	7	747	5500	0	26.25	81.46	-0.562	4
P06213	PF01030	Recep_L_domain	113	13348.8	7.98	12	13	1915	13075	12950	36.01	124.16	0.303	2	58.55	Q14451	PF08947	BPS	48	5333.97	8.6	6	7	747	5500	0	26.25	81.46	-0.562	4
P06213	PF07714	Pkinase Tyr	268	30260.9	5.82	34	30	4237	34170	33920	36.38	83.99	-0.208	2	6.02	Q14451	PF08947	BPS	48	5333.97	8.6	6	7	747	5500	0	26.25	81.46	-0.562	4
P06213	PF00757	Furin-like	162	18083.6	7.77	13	15	2413	20075	18450	56.85	45.68	-0.491	2	2.21	Q05397	PF07714	Pkinase_Tyr	255	29112.9	8.73	26	31	4095	42900	42400	57.74	88.31	-0.132	2
P06213	PF01030	Recep_L_domain	113	13348.8	7.98	12	13	1915	13075	12950	36.01	124.16	0.303	2	2.32	Q05397	PF07714	Pkinase_Tyr	255	29112.9	8.73	26	31	4095	42900	42400	57.74	88.31	-0.132	2
Q05397	PF03623	Focal_AT	133	14817.3	5.68	17	15	2127	5960	0	44.65	110.75	-0.109	1	1.85	P05556	PF07965	Integrin_B_tail	89	10217.4	4.91	16	10	1378	10470	9970	51.49	43.6	-0.873	2
Q05397	PF03623	Focal_AT	133	14817.3	5.68	17	15	2127	5960	0	44.65	110.75	-0.109	1	1.88	P05556	PF08725	Integrin_b_cyt	45	5370.23	9.11	7	9	762	8480	0	17.19	69.33	-0.8	2
Q05397	PF00373	FERM_M	125	15004.3	8.52	19	21	2128	13075	12950	48.15	86.56	-0.499	9	9.65	P05556	PF07965	Integrin_B_tail	89	10217.4	4.91	16	10	1378	10470	9970	51.49	43.6	-0.873	2
Q05397	PF00373	FERM_M	125	15004.3	8.52	19	21	2128	13075	12950	48.15	86.56	-0.499	9	10.7	P05556	PF08725	Integrin_b_cyt	45	5370.23	9.11	7	9	762	8480	0	17.19	69.33	-0.8	2
Q05397	PF00373	FERM_M	125	15004.3	8.52	19	21	2128	13075	12950	48.15	86.56	-0.499	9	6.73	P05556	PF07974	EGF_2	32	3353.81	6.14	3	3	441	375	0	18.91	36.56	-0.338	2
Q05397	PF07714	Pkinase_Tyr	255	29112.9	8.73	26	31	4095	42900	42400	57.74	88.31	-0.132	2	2.68	P05556	PF07974	EGF_2	32	3353.81	6.14	3	3	441	375	0	18.91	36.56	-0.338	2
Q05397	PF03623	Focal_AT	133	14817.3	5.68	17	15	2127	5960	0	44.65	110.75	-0.109	1	10.02	P43405	PF07714	Pkinase_Tyr	256	29440	7.55	32	33	4114	55600	55350	30.88	78.83	-0.389	2
Q05397	PF03623	Focal_AT	133	14817.3	5.68	17	15	2127	5960	0	44.65	110.75	-0.109	1	10.02	P06213	PF07714	Pkinase Tyr	268	30260.9	5.82	34	30	4237	34170	33920	36.38	83.99	-0.208	2
Q05397	PF03623	Focal_AT	133	14817.3	5.68	17	15	2127	5960	0	44.65	110.75	-0.109	1	10.02	P06241	PF07714	Pkinase Tyr	250	28475.1	7.79	30	31	4027	42650	42400	40.14	91.68	-0.221	4
Q05397	PF03623	Focal_AT	133	14817.3	5.68	17	15	2127	5960	0	44.65	110.75	-0.109	1	10.02	P12931	PF07714	Pkinase Tyr	250	28537.2	7.01	31	31	4023	44265	43890	41.6	86.96	-0.204	4
Q05397	PF00373	FERM_M	125	15004.3	8.52	19	21	2128	13075	12950	48.15	86.56	-0.499	9	10.02	P00519	PF08919	F_actin_bind	106	11510.1	6.77	11	11	1620	3105	2980	39.22	93.02	-0.071	5
Q05397	PF07714	Pkinase_Tyr	255	29112.9	8.73	26	31	4095	42900	42400	57.74	88.31	-0.132	2	1.58	P00519	PF07714	Pkinase Tyr	252	29037.5	5.76	33	28	4067	55600	55350	34.84	83.97	-0.232	4
P31749	PF00169	PH	103	12397.1	7.99	15	16	1737	26595	26470	33.61	70	-0.795	4	1.63	Q13418	PF07714	Pkinase_Tyr	254	28914.7	8.6	27	30	4068	43220	42970	51.17	85.59	-0.194	5
P31749	PF00069	Pkinase	259	29957.7	6.79	39	38	4222	29130	28880	26.65	85.44	-0.334	2	1.76	Q13418	PF07714	Pkinase_Tyr	254	28914.7	8.6	27	30	4068	43220	42970	51.17	85.59	-0.194	5
P31749	PF00069	Pkinase	259	29957.7	6.79	39	38	4222	29130	28880	26.65	85.44	-0.334	2	6.86	Q13153	PF00786	PBD	59	6708.47	4.63	4	4	933	6990	0	51.85	77.63	-0.436	4
P31749	PF00169	PH	103	12397.1	7.99	15	16	1737	26595	26470	33.61	70	-0.795	4	10.03	Q13153	PF00786	PBD	59	6708.47	4.63	4	4	933	6990	0	51.85	77.63	-0.436	4
P62993	PF00018	SH3 1	47	5438.11	4.85	10	8	760	8480	8480	23.19	72.77	-0.8	2	1.91	P50570	PF02212	GED	92	10704.3	5.73	13	10	1508	5960	0	55.8	107.17	-0.248	1
P62993	PF00018	SH3 1	47	5438.11	4.85	10	8	760	8480	8480	23.19	72.77	-0.8	2	1.91	P50570	PF01031	Dynamin_M	287	33434.4	9.22	42	49	4758	10555	10430	46.18	92.06	-0.587	5
P62993	PF00018	SH3 1	47	5438.11	4.85	10	8	760	8480	8480	23.19	72.77	-0.8	2	1.93	P50570	PF00169	PH	105	12441.2	6.78	17	17	1746	27960	27960	65.31	80.76	-0.606	5
P62993	PF00017	SH2	76	8806.02	8.26	10	11	1234	13980	0	19.84	75.66	-0.37	4	2.61	P50570	PF00169	PH	105	12441.2	6.78	17	17	1746	27960	27960	65.31	80.76	-0.606	5
P62993	PF00018	SH3 1	47	5438.11	4.85	10	8	760	8480	8480	23.19	72.77	-0.8	2	1.93	Q13480	PF00169	PH	111	13222.3	8.83	16	20	1860	29700	29450	58.48	85.14	-0.5	9
P62993	PF00017	SH2	76	8806.02	8.26	10	11	1234	13980	0	19.84	75.66	-0.37	4	2.61	Q13480	PF00169	PH	111	13222.3	8.83	16	20	1860	29700	29450	58.48	85.14	-0.5	9
P62993	PF00018	SH3 1	47	5438.11	4.85	10	8	760	8480	8480	23.19	72.77	-0.8	2	1.56	P43405	PF00017	SH2	78	8729.69	6.64	8	7	1198	8940	8940	71.17	72.69	-0.419	4
P62993	PF00017	SH2	76	8806.02	8.26	10	11	1234	13980	0	19.84	75.66	-0.37	4	2.39	P43405	PF00017	SH2	78	8729.69	6.64	8	7	1198	8940	8940	71.17	72.69	-0.419	4
P62993	PF00018	SH3 1	47	5438.11	4.85	10	8	760	8480	8480	23.19	72.77	-0.8	2	1.84	P35568	PF02174	IRS	103	11591.5	8.01	10	11	1638	12615	12490	38.31	95.53	0.108	4
P62993	PF00017	SH2	76	8806.02	8.26	10	11	1234	13980	0	19.84	75.66	-0.37	4	13.04	P35568	PF02174	IRS	103	11591.5	8.01	10	11	1638	12615	12490	38.31	95.53	0.108	4
P62993	PF00018	SH3 1	47	5438.11	4.85	10	8	760	8480	8480	23.19	72.77	-0.8	2	1.93	P35568	PF00169	PH	108	12525.1	9.55	14	20	1751	18450	18450	66.42	65.19	-0.872	4
P62993	PF00017	SH2	76	8806.02	8.26	10	11	1234	13980	0	19.84	75.66	-0.37	4	2.61	P35568	PF00169	PH	108	12525.1	9.55	14	20	1751	18450	18450	66.42	65.19	-0.872	4
P62993	PF00018	SH3 1	47	5438.11	4.85	10	8	760	8480	8480	23.19	72.77	-0.8	2	3.12	Q13905	PF00617	RasGEF	171	20057.1	5.69	23	20	2842	32555	32430	53.18	101.58	-0.267	4
P62993	PF00018	SH3 1	47	5438.11	4.85	10	8	760	8480	8480	23.19	72.77	-0.8	2	3.2	Q13905	PF00618	RasGEF_N	117	13651	6.8	18	18	1966	6085	5960	36.52	116.5	0.107	5
P62993	PF00017	SH2	76	8806.02	8.26	10	11	1234	13980	0	19.84	75.66	-0.37	4	3.3	Q13905	PF00617	RasGEF	171	20057.1	5.69	23	20	2842	32555	32430	53.18	101.58	-0.267	4
P62993	PF00017	SH2	76	8806.02	8.26	10	11	1234	13980	0	19.84	75.66	-0.37	4	3.44	Q13905	PF00618	RasGEF_N	117	13651	6.8	18	18	1966	6085	5960	36.52	116.5	0.107	5
P62993	PF00018	SH3 1	47	5438.11	4.85	10	8	760	8480	8480	23.19	72.77	-0.8	2	1.56	Q05397	PF07714	Pkinase_Tyr	255	29112.9	8.73	26	31	4095	42900	42400	57.74	88.31	-0.132	2
P62993	PF00017	SH2	76	8806.02	8.26	10	11	1234	13980	0	19.84	75.66	-0.37	4	2.39	Q05397	PF07714	Pkinase_Tyr	255	29112.9	8.73	26	31	4095	42900	42400	57.74	88.31	-0.132	2
P62993	PF00017	SH2	76	8806.02	8.26	10	11	1234	13980	0	19.84	75.66	-0.37	4	1.63	P42336	PF00794	PI3K_rbd	76	9071.42	5.11	14	10	1287	3105	2980	60.42	100	-0.279	4
P62993	PF00017	SH2	76	8806.02	8.26	10	11	1234	13980	0	19.84	75.66	-0.37	4	2.78	P42336	PF02192	PI3K_p85B	120	13986.6	9.07	12	18	1999	17670	17420	48.03	103.08	-0.201	2
P62993	PF00018	SH3 1	47	5438.11	4.85	10	8	760	8480	8480	23.19	72.77	-0.8	2	2.83	P22681	PF00627	UBA	47	5272.97	4.59	5	3	742	2980	0	103.58	103.83	-0.151	4
P62993	PF00018	SH3 1	47	5438.11	4.85	10	8	760	8480	8480	23.19	72.77	-0.8	2	9.54	P22681	PF02262	Cbl_N	125	14848.5	9.46	15	22	2117	13075	12950	31.71	84.96	-0.525	4
P62993	PF00018	SH3 1	47	5438.11	4.85	10	8	760	8480	8480	23.19	72.77	-0.8	2	9.54	P22681	PF02761	Cbl_N2	84	9796.25	8.14	9	10	1378	23490	23490	23.32	84.88	-0.079	4
P62993	PF00018	SH3 1	47	5438.11	4.85	10	8	760	8480	8480	23.19	72.77	-0.8	2	9.54	P22681	PF02762	Cbl_N3	86	9890.32	8.85	7	9	1387	12950	12950	46.45	80.58	-0.307	4
P62993	PF00017	SH2	76	8806.02	8.26	10	11	1234	13980	0	19.84	75.66	-0.37	4	5.21	P22681	PF02262	Cbl_N	125	14848.5	9.46	15	22	2117	13075	12950	31.71	84.96	-0.525	4
P62993	PF00017	SH2	76	8806.02	8.26	10	11	1234	13980	0	19.84	75.66	-0.37	4	5.21	P22681	PF02761	Cbl_N2	84	9796.25	8.14	9	10	1378	23490	23490	23.32	84.88	-0.079	4
P62993	PF00017	SH2	76	8806.02	8.26	10	11	1234	13980	0	19.84	75.66	-0.37	4	5.21	P22681	PF02762	Cbl_N3	86	9890.32	8.85	7	9	1387	12950	12950	46.45	80.58	-0.307	4
P62993	PF00018	SH3 1	47	5438.11	4.85	10	8	760	8480	8480	23.19	72.77	-0.8	2	1.55	P18031	PF00102	Y_phosphatase	237	27615.7	6.73	32	31	3868	34170	33920	37.5	81.39	-0.47	2
P62993	PF00017	SH2	76	8806.02	8.26	10	11	1234	13980	0	19.84	75.66	-0.37	4	2.84	P18031	PF00102	Y_phosphatase	237	27615.7	6.73	32	31	3868	34170	33920	37.5	81.39	-0.47	2
P62993	PF00018	SH3 1	47	5438.11	4.85	10	8	760	8480	8480	23.19	72.77	-0.8	2	1.56	Q14289	PF07714	Pkinase_Tyr	255	29581.5	5.82	35	31	4171	51380	50880	52.15	96.24	-0.081	2
P62993	PF00017	SH2	76	8806.02	8.26	10	11	1234	13980	0	19.84	75.66	-0.37	4	2.39	Q14289	PF07714	Pkinase_Tyr	255	29581.5	5.82	35	31	4171	51380	50880	52.15	96.24	-0.081	2
P62993	PF00018	SH3 1	47	5438.11	4.85	10	8	760	8480	8480	23.19	72.77	-0.8	2	2.8	Q86YL6	PF00620	RhoGAP	153	17624.2	6.17	18	15	2487	17545	17420	50.95	102.61	-0.192	1
P62993	PF00017	SH2	76	8806.02	8.26	10	11	1234	13980	0	19.84	75.66	-0.37	4	3.6	Q86YL6	PF00620	RhoGAP	153	17624.2	6.17	18	15	2487	17545	17420	50.95	102.61	-0.192	1
P62993	PF00017	SH2	76	8806.02	8.26	10	11	1234	13980	0	19.84	75.66	-0.37	4	1.73	Q86YL6	PF00018	SH3 9	52	5849.81	6.89	6	6	830	12490	12490	11.89	95.38	0.008	9
P62993	PF00018	SH3 1	47	5438.11	4.85	10	8	760	8480	8480	23.19	72.77	-0.8	2	2.72	P46108	PF07653	SH3_2	57	6453.43	9.36	6	9	918	8480	8480	29.38	90.53	-0.374	1
P62993	PF00017	SH2	76	8806.02	8.26	10	11	1234	13980	0	19.84	75.66	-0.37	4	2.9	P46108	PF00017	SH2	92	10174.4	6.94	8	8	1423	16960	0	87.65	80.43	-0.423	2
P62993	PF00017	SH2	76	8806.02	8.26	10	11	1234	13980	0	19.84	75.66	-0.37	4	1.73	P46108	PF00017	SH2	92	10174.4	6.94	8	8	1423	16960	0	87.65	80.43	-0.423	2
P62993	PF00017	SH2	76	8806.02	8.26	10	11	1234	13980	0	19.84	75.66	-0.37	4	1.74	P20936	PF00168	C2	99	11566.2	6.49	13	12	1624	14105	13980	47.24	84.65	-0.497	4
P62993	PF00018	SH3 1	47	5438.11	4.85	10	8	760	8480	8480	23.19	72.77	-0.8	2	1.93	P20936	PF00169	PH	103	11972.8	8.44	12	14	1684	20065	19940	40.94	81.36	-0.276	4
P62993	PF00017	SH2	76	8806.02	8.26	10	11	1234	13980	0	19.84	75.66	-0.37	4	2.61	P20936	PF00169	PH	103	11972.8	8.44	12	14	1684	20065	19940	40.94	81.36	-0.276	4
P62993	PF00017	SH2	76	8806.02	8.26	10	11	1234	13980	0	19.84	75.66	-0.37	4	1.73	P20936	PF00018	SH3 1	49	5736.51	4.28	10	4	802	12490	0	27.96	97.35	-0.237	4
P15154	PF00071	Ras	174	19348.4	6.17	21	20	2738	23295	22920	27.85	94.08	-0.073	9	2.47	P31749	PF00433	Pkinase_C	46	5463.88	4.02	11	3	729	2980	2980	62.05	31.74	-0.987	1
P15154	PF00071	Ras	174	19348.4	6.17	21	20	2738	23295	22920	27.85	94.08	-0.073	9	1.86	P31749	PF00169	PH	103	12397.1	7.99	15	16	1737	26595	26470	33.61	70	-0.795	4
P15154	PF00071	Ras	174	19348.4	6.17	21	20	2738	23295	22920	27.85	94.08	-0.073	9	5.46	Q15052	PF00621	RhoGEF	175	19889.8	5.17	21	12	2780	7825	7450	49.09	92.46	-0.223	1
P15154	PF00071	Ras	174	19348.4	6.17	21	20	2738	23295	22920	27.85	94.08	-0.073	9	1.86	Q15052	PF00169	PH	106	12191	4.75	14	9	1703	10095	9970	36.72	97.36	-0.078	3
P15154	PF00071	Ras	174	19348.4	6.17	21	20	2738	23295	22920	27.85	94.08	-0.073	9	35.31	Q4KMG1	PF00620	RhoGAP	152	17208.9	5.3	22	19	2445	9190	8940	49.28	98.03	-0.225	4
P15154	PF00071	Ras	174	19348.4	6.17	21	20	2738	23295	22920	27.85	94.08	-0.073	9	1.86	Q4KMG1	PF00169	PH	105	12250	7.05	15	15	1704	26595	26470	34.85	66.76	-0.648	2
P15154	PF00071	Ras	174	19348.4	6.17	21	20	2738	23295	22920	27.85	94.08	-0.073	9	7.39	O75962	PF00435	Spectrin	107	12502.1	5.8	12	8	1722	15470	15470	60.38	78.5	-0.393	4
P15154	PF00071	Ras	174	19348.4	6.17	21	20	2738	23295	22920	27.85	94.08	-0.073	9	5.46	O75962	PF00621	RhoGEF	173	20152.2	4.9	28	18	2823	24660	24410	37.54	91.27	-0.309	4
P15154	PF00071	Ras	174	19348.4	6.17	21	20	2738	23295	22920	27.85	94.08	-0.073	9	1.86	O75962	PF00169	PH	112	13041	8.73	16	18	1855	19480	19480	51.76	88.66	-0.476	4
P15154	PF00071	Ras	174	19348.4	6.17	21	20	2738	23295	22920	27.85	94.08	-0.073	9	8.49	P15498	PF00130	C1_1	53	6139.05	8.92	4	8	826	3355	2980	60.14	33.21	-0.63	4
P15154	PF00071	Ras	174	19348.4	6.17	21	20	2738	23295	22920	27.85	94.08	-0.073	9	5.46	P15498	PF00621	RhoGEF	173	20375.7	7.9	24	25	2890	9065	8940	34.96	98.09	-0.408	1
P15154	PF00071	Ras	174	19348.4	6.17	21	20	2738	23295	22920	27.85	94.08	-0.073	9	1.86	P15498	PF00169	PH	102	12184	8.8	18	20	1711	15470	15470	41.2	73.63	-0.75	1
P15154	PF00071	Ras	174	19348.4	6.17	21	20	2738	23295	22920	27.85	94.08	-0.073	9	25.89	Q13009	PF02196	RBD	74	8743.09	5.18	11	7	1230	11585	11460	66.46	100.14	-0.336	3
P15154	PF00071	Ras	174	19348.4	6.17	21	20	2738	23295	22920	27.85	94.08	-0.073	9	2.1	Q13009	PF00595	PDZ	81	8755.86	5.26	12	10	1241	2980	0	41.36	100	-0.252	1
P15154	PF00071	Ras	174	19348.4	6.17	21	20	2738	23295	22920	27.85	94.08	-0.073	9	5.46	Q13009	PF00621	RhoGEF	189	21958.5	6	28	25	3135	12045	11920	24.47	101.59	-0.166	9
P15154	PF00071	Ras	174	19348.4	6.17	21	20	2738	23295	22920	27.85	94.08	-0.073	9	1.86	Q13009	PF00169	PH	133	15041.5	9.05	16	20	2136	19605	19480	38.48	90.9	-0.204	9
P15154	PF00071	Ras	174	19348.4	6.17	21	20	2738	23295	22920	27.85	94.08	-0.073	9	5.08	P61586	PF00071	Ras	102	11528.1	4.19	19	8	1608	17210	16960	42.62	92.55	-0.082	2
P15154	PF00071	Ras	174	19348.4	6.17	21	20	2738	23295	22920	27.85	94.08	-0.073	9	34.29	Q13153	PF00786	PBD	59	6708.47	4.63	4	4	933	6990	0	51.85	77.63	-0.436	4
Q13480	PF00169	PH	111	13222.3	8.83	16	20	1860	29700	29450	58.48	85.14	-0.5	9	2.87	P06213	PF00757	Furin-like	162	18083.6	7.77	13	15	2413	20075	18450	56.85	45.68	-0.491	2
Q13480	PF00169	PH	111	13222.3	8.83	16	20	1860	29700	29450	58.48	85.14	-0.5	9	3.29	P06213	PF01030	Recep_L_domain	113	13348.8	7.98	12	13	1915	13075	12950	36.01	124.16	0.303	2
Q13480	PF00169	PH	111	13222.3	8.83	16	20	1860	29700	29450	58.48	85.14	-0.5	9	1.63	P06213	PF07714	Pkinase Tyr	268	30260.9	5.82	34	30	4237	34170	33920	36.38	83.99	-0.208	2
Q13480	PF00169	PH	111	13222.3	8.83	16	20	1860	29700	29450	58.48	85.14	-0.5	9	2.63	Q13464	PF08912	Rho_Binding	67	8010.12	5.29	17	15	1143	1490	0	76.91	81.64	-1.218	4
Q13480	PF00169	PH	111	13222.3	8.83	16	20	1860	29700	29450	58.48	85.14	-0.5	9	1.77	P46108	PF07653	SH3_2	57	6453.43	9.36	6	9	918	8480	8480	29.38	90.53	-0.374	1
Q13393	PF00169	PH	109	12581.8	9.83	10	21	1789	28210	27960	48.91	86.79	-0.307	2	2.33	P12814	PF00435	Spectrin	111	13421.4	5.74	18	16	1872	26595	26470	47.53	77.3	-0.864	4
Q13393	PF00169	PH	109	12581.8	9.83	10	21	1789	28210	27960	48.91	86.79	-0.307	2	2.01	P12814	PF00307	CH	106	12008.2	9.78	12	18	1732	11000	11000	38.32	106.7	-0.097	4
Q13017	PF00071	Ras	107	12205.1	6.76	14	14	1719	1740	1490	40.35	90.09	-0.202	1	5.08	P61586	PF00071	Ras	102	11528.1	4.19	19	8	1608	17210	16960	42.62	92.55	-0.082	2
P20936	PF00169	PH	103	11972.8	8.44	12	14	1684	20065	19940	40.94	81.36	-0.276	4	3.35	P63244	PF00400	WD40	40	4545.36	10.28	2	5	646	11000	0	17.84	80.5	-0.193	4
P20936	PF00169	PH	103	11972.8	8.44	12	14	1684	20065	19940	40.94	81.36	-0.276	4	1.87	P06213	PF00757	Furin-like	162	18083.6	7.77	13	15	2413	20075	18450	56.85	45.68	-0.491	2
P20936	PF00169	PH	103	11972.8	8.44	12	14	1684	20065	19940	40.94	81.36	-0.276	4	3.29	P06213	PF01030	Recep_L_domain	113	13348.8	7.98	12	13	1915	13075	12950	36.01	124.16	0.303	2
P20936	PF00017	SH2	76	8826.05	9.57	7	11	1231	14440	14440	41.75	82.11	-0.336	4	3.41	P06213	PF00757	Furin-like	162	18083.6	7.77	13	15	2413	20075	18450	56.85	45.68	-0.491	2
P20936	PF00017	SH2	76	8826.05	9.57	7	11	1231	14440	14440	41.75	82.11	-0.336	4	4.21	P06213	PF01030	Recep_L_domain	113	13348.8	7.98	12	13	1915	13075	12950	36.01	124.16	0.303	2
P20936	PF00169	PH	103	11972.8	8.44	12	14	1684	20065	19940	40.94	81.36	-0.276	4	1.63	P06213	PF07714	Pkinase Tyr	268	30260.9	5.82	34	30	4237	34170	33920	36.38	83.99	-0.208	2
P20936	PF00018	SH3 1	49	5736.51	4.28	10	4	802	12490	0	27.96	97.35	-0.237	4	1.56	P06213	PF07714	Pkinase Tyr	268	30260.9	5.82	34	30	4237	34170	33920	36.38	83.99	-0.208	2
P20936	PF00017	SH2	76	8826.05	9.57	7	11	1231	14440	14440	41.75	82.11	-0.336	4	2.39	P06213	PF07714	Pkinase Tyr	268	30260.9	5.82	34	30	4237	34170	33920	36.38	83.99	-0.208	2
P20936	PF00169	PH	103	11972.8	8.44	12	14	1684	20065	19940	40.94	81.36	-0.276	4	1.63	P12931	PF07714	Pkinase Tyr	250	28537.2	7.01	31	31	4023	44265	43890	41.6	86.96	-0.204	4
P20936	PF00018	SH3 1	49	5736.51	4.28	10	4	802	12490	0	27.96	97.35	-0.237	4	1.56	P12931	PF07714	Pkinase Tyr	250	28537.2	7.01	31	31	4023	44265	43890	41.6	86.96	-0.204	4
P20936	PF00017	SH2	76	8826.05	9.57	7	11	1231	14440	14440	41.75	82.11	-0.336	4	2.39	P12931	PF07714	Pkinase Tyr	250	28537.2	7.01	31	31	4023	44265	43890	41.6	86.96	-0.204	4
P20936	PF00017	SH2	76	8826.05	9.57	7	11	1231	14440	14440	41.75	82.11	-0.336	4	1.73	P12931	PF00018	SH3 1	48	5477.99	4.7	7	4	756	15470	0	24.9	73.13	-0.669	2
P20936	PF00017	SH2	76	8826.05	9.57	7	11	1231	14440	14440	41.75	82.11	-0.336	4	2.29	P00519	PF08919	F_actin_bind	106	11510.1	6.77	11	11	1620	3105	2980	39.22	93.02	-0.071	5
P20936	PF00169	PH	103	11972.8	8.44	12	14	1684	20065	19940	40.94	81.36	-0.276	4	1.63	P00519	PF07714	Pkinase Tyr	252	29037.5	5.76	33	28	4067	55600	55350	34.84	83.97	-0.232	4
P20936	PF00018	SH3 1	49	5736.51	4.28	10	4	802	12490	0	27.96	97.35	-0.237	4	1.56	P00519	PF07714	Pkinase Tyr	252	29037.5	5.76	33	28	4067	55600	55350	34.84	83.97	-0.232	4
P20936	PF00017	SH2	76	8826.05	9.57	7	11	1231	14440	14440	41.75	82.11	-0.336	4	2.39	P00519	PF07714	Pkinase Tyr	252	29037.5	5.76	33	28	4067	55600	55350	34.84	83.97	-0.232	4
P20936	PF00017	SH2	76	8826.05	9.57	7	11	1231	14440	14440	41.75	82.11	-0.336	4	1.73	P00519	PF00018	SH3 1	47	5154.7	5.56	5	4	711	13980	13980	11.34	72.55	-0.502	4
P20936	PF00169	PH	103	11972.8	8.44	12	14	1684	20065	19940	40.94	81.36	-0.276	4	1.63	P06241	PF07714	Pkinase Tyr	250	28475.1	7.79	30	31	4027	42650	42400	40.14	91.68	-0.221	4
P20936	PF00018	SH3 1	49	5736.51	4.28	10	4	802	12490	0	27.96	97.35	-0.237	4	1.56	P06241	PF07714	Pkinase Tyr	250	28475.1	7.79	30	31	4027	42650	42400	40.14	91.68	-0.221	4
P20936	PF00017	SH2	76	8826.05	9.57	7	11	1231	14440	14440	41.75	82.11	-0.336	4	2.39	P06241	PF07714	Pkinase Tyr	250	28475.1	7.79	30	31	4027	42650	42400	40.14	91.68	-0.221	4
P20936	PF00017	SH2	76	8826.05	9.57	7	11	1231	14440	14440	41.75	82.11	-0.336	4	1.73	P06241	PF00018	SH3 1	48	5513.93	4.31	10	4	751	15470	0	40.5	61.04	-0.798	4
P20936	PF00169	PH	103	11972.8	8.44	12	14	1684	20065	19940	40.94	81.36	-0.276	4	1.63	P41240	PF07714	Pkinase_Tyr	246	27472.8	7.75	31	32	3885	35660	35410	32.98	92.68	-0.14	4
P20936	PF00018	SH3 1	49	5736.51	4.28	10	4	802	12490	0	27.96	97.35	-0.237	4	1.56	P41240	PF07714	Pkinase_Tyr	246	27472.8	7.75	31	32	3885	35660	35410	32.98	92.68	-0.14	4
P20936	PF00017	SH2	76	8826.05	9.57	7	11	1231	14440	14440	41.75	82.11	-0.336	4	2.39	P41240	PF07714	Pkinase_Tyr	246	27472.8	7.75	31	32	3885	35660	35410	32.98	92.68	-0.14	4
P20936	PF00017	SH2	76	8826.05	9.57	7	11	1231	14440	14440	41.75	82.11	-0.336	4	1.73	P41240	PF00018	SH3 1	48	5318.14	8.9	5	7	756	8480	8480	14.35	83.33	-0.315	4
P20936	PF00168	C2	99	11566.2	6.49	13	12	1624	14105	13980	47.24	84.65	-0.497	4	2.31	O60711	PF00412	LIM	56	6306.15	6.54	5	4	856	8730	8480	66.88	59.29	-0.28	3
P20936	PF00018	SH3 1	49	5736.51	4.28	10	4	802	12490	0	27.96	97.35	-0.237	4	18.95	O60711	PF00412	LIM	56	6306.15	6.54	5	4	856	8730	8480	66.88	59.29	-0.28	3
P20936	PF00017	SH2	76	8826.05	9.57	7	11	1231	14440	14440	41.75	82.11	-0.336	4	20.99	O60711	PF00412	LIM	56	6306.15	6.54	5	4	856	8730	8480	66.88	59.29	-0.28	3
P67775	PF00149	Metallophos	196	22256.2	5.38	25	17	3082	33140	32890	29.73	85.97	-0.231	4	3.06	Q03135	PF01146	Caveolin	134	15521	5.64	15	11	2198	31065	30940	23.41	110.52	0.383	9
P61586	PF00071	Ras	102	11528.1	4.19	19	8	1608	17210	16960	42.62	92.55	-0.082	2	22.99	Q13464	PF08912	Rho_Binding	67	8010.12	5.29	17	15	1143	1490	0	76.91	81.64	-1.218	4
P61586	PF00071	Ras	102	11528.1	4.19	19	8	1608	17210	16960	42.62	92.55	-0.082	2	35.31	Q13017	PF00620	RhoGAP	152	17527.1	5.46	22	16	2464	11585	11460	30.52	92.96	-0.287	2
P61586	PF00071	Ras	102	11528.1	4.19	19	8	1608	17210	16960	42.62	92.55	-0.082	2	5.08	Q13017	PF00071	Ras	107	12205.1	6.76	14	14	1719	1740	1490	40.35	90.09	-0.202	1
P61586	PF00071	Ras	102	11528.1	4.19	19	8	1608	17210	16960	42.62	92.55	-0.082	2	3.81	P19174	PF00388	PI-PLC-X	144	16350.8	7.7	15	16	2287	20190	19940	49.06	84.65	-0.327	4
P61586	PF00071	Ras	102	11528.1	4.19	19	8	1608	17210	16960	42.62	92.55	-0.082	2	4.08	P19174	PF00387	PI-PLC-Y	134	15558.1	9.43	14	22	2189	16180	15930	47.53	70.6	-0.613	1
P61586	PF00071	Ras	102	11528.1	4.19	19	8	1608	17210	16960	42.62	92.55	-0.082	2	7.55	P19174	PF00168	C2	106	11892.7	6.12	12	11	1675	10095	9970	36.59	82.74	-0.049	4
P61586	PF00071	Ras	102	11528.1	4.19	19	8	1608	17210	16960	42.62	92.55	-0.082	2	1.86	P19174	PF00017	SH2	90	10381.6	6.19	12	10	1434	17085	16960	38.82	73.67	-0.412	4
P61586	PF00071	Ras	102	11528.1	4.19	19	8	1608	17210	16960	42.62	92.55	-0.082	2	2.88	P18031	PF00102	Y_phosphatase	237	27615.7	6.73	32	31	3868	34170	33920	37.5	81.39	-0.47	2
Q8IZP0	PF00018	SH3 1	46	5249.9	4.31	9	5	726	11460	11460	9.09	80.43	-0.315	4	1.56	Q14289	PF07714	Pkinase_Tyr	255	29581.5	5.82	35	31	4171	51380	50880	52.15	96.24	-0.081	2
Q8IZP0	PF00018	SH3 1	46	5249.9	4.31	9	5	726	11460	11460	9.09	80.43	-0.315	4	1.56	Q05397	PF07714	Pkinase_Tyr	255	29112.9	8.73	26	31	4095	42900	42400	57.74	88.31	-0.132	2
Q8IZP0	PF00018	SH3 1	46	5249.9	4.31	9	5	726	11460	11460	9.09	80.43	-0.315	4	4.85	Q13153	PF00786	PBD	59	6708.47	4.63	4	4	933	6990	0	51.85	77.63	-0.436	4
Q8IZP0	PF00018	SH3 1	46	5249.9	4.31	9	5	726	11460	11460	9.09	80.43	-0.315	4	1.81	Q13153	PF00069	Pkinase	252	28371.6	4.83	34	23	3983	30160	29910	39.46	93.61	-0.173	4
Q8IZP0	PF00018	SH3 1	46	5249.9	4.31	9	5	726	11460	11460	9.09	80.43	-0.315	4	1.55	Q06124	PF00102	Y_phosphatase	252	29018.1	7.8	32	33	4054	37150	36900	35.25	78.77	-0.515	4
Q05209	PF00102	Y_phosphatase	235	27666.7	6.72	30	29	3854	47245	46870	31.03	79.66	-0.411	4	6.17	P43405	PF07714	Pkinase_Tyr	256	29440	7.55	32	33	4114	55600	55350	30.88	78.83	-0.389	2
Q05209	PF00102	Y_phosphatase	235	27666.7	6.72	30	29	3854	47245	46870	31.03	79.66	-0.411	4	2	P43405	PF07714	Pkinase_Tyr	256	29440	7.55	32	33	4114	55600	55350	30.88	78.83	-0.389	2
Q05209	PF00102	Y_phosphatase	235	27666.7	6.72	30	29	3854	47245	46870	31.03	79.66	-0.411	4	6.17	Q06124	PF00373	FERM_M	120	14427.7	8.53	16	18	2021	7575	7450	63.36	70.75	-0.588	4
Q05209	PF00102	Y_phosphatase	235	27666.7	6.72	30	29	3854	47245	46870	31.03	79.66	-0.411	4	2	Q06124	PF07714	Pkinase_Tyr	255	29581.5	5.82	35	31	4171	51380	50880	52.15	96.24	-0.081	2
Q05209	PF00102	Y_phosphatase	235	27666.7	6.72	30	29	3854	47245	46870	31.03	79.66	-0.411	4	2	P41240	PF07714	Pkinase_Tyr	246	27472.8	7.75	31	32	3885	35660	35410	32.98	92.68	-0.14	4
Q05209	PF00102	Y_phosphatase	235	27666.7	6.72	30	29	3854	47245	46870	31.03	79.66	-0.411	4	2	P00519	PF07714	Pkinase Tyr	252	29037.5	5.76	33	28	4067	55600	55350	34.84	83.97	-0.232	4
P41240	PF00018	SH3 1	48	5318.14	8.9	5	7	756	8480	8480	14.35	83.33	-0.315	4	18.95	P49023	PF00412	LIM	56	6445.28	6.44	7	6	869	8730	8480	41.37	41.79	-0.646	4
P41240	PF00017	SH2	75	8961.13	5.2	12	7	1237	16055	15930	32.37	79.2	-0.469	4	20.99	P49023	PF00412	LIM	56	6445.28	6.44	7	6	869	8730	8480	41.37	41.79	-0.646	4
P41240	PF00018	SH3 1	48	5318.14	8.9	5	7	756	8480	8480	14.35	83.33	-0.315	4	1.56	P06241	PF07714	Pkinase Tyr	250	28475.1	7.79	30	31	4027	42650	42400	40.14	91.68	-0.221	4
P41240	PF00017	SH2	75	8961.13	5.2	12	7	1237	16055	15930	32.37	79.2	-0.469	4	2.39	P06241	PF07714	Pkinase Tyr	250	28475.1	7.79	30	31	4027	42650	42400	40.14	91.68	-0.221	4
P41240	PF00017	SH2	75	8961.13	5.2	12	7	1237	16055	15930	32.37	79.2	-0.469	4	1.73	P06241	PF00018	SH3 1	48	5513.93	4.31	10	4	751	15470	0	40.5	61.04	-0.798	4
P41240	PF00018	SH3 1	48	5318.14	8.9	5	7	756	8480	8480	14.35	83.33	-0.315	4	2.05	P17252	PF00130	C1_1	53	6193.25	8.82	2	6	841	5875	5500	48.92	40.38	0.134	2
P41240	PF00017	SH2	75	8961.13	5.2	12	7	1237	16055	15930	32.37	79.2	-0.469	4	1.74	P17252	PF00168	C2	107	12484.4	9.56	14	19	1765	24980	0	30.69	70.09	-0.824	4
P41240	PF00017	SH2	75	8961.13	5.2	12	7	1237	16055	15930	32.37	79.2	-0.469	4	2.62	P17252	PF00130	C1_1	53	6193.25	8.82	2	6	841	5875	5500	48.92	40.38	0.134	2
P41240	PF00018	SH3 1	48	5318.14	8.9	5	7	756	8480	8480	14.35	83.33	-0.315	4	1.81	P17252	PF00069	Pkinase	259	29537.2	5.41	38	29	4135	29255	28880	31.95	85.02	-0.132	2
P41240	PF00018	SH3 1	48	5318.14	8.9	5	7	756	8480	8480	14.35	83.33	-0.315	4	18.95	Q9BPW3	PF00412	LIM	46	4651.24	6.89	3	3	631	5750	5500	33.19	55.22	0.052	2
P41240	PF00017	SH2	75	8961.13	5.2	12	7	1237	16055	15930	32.37	79.2	-0.469	4	20.99	Q9BPW3	PF00412	LIM	46	4651.24	6.89	3	3	631	5750	5500	33.19	55.22	0.052	2
P41240	PF00018	SH3 1	48	5318.14	8.9	5	7	756	8480	8480	14.35	83.33	-0.315	4	18.95	O60711	PF00412	LIM	56	6306.15	6.54	5	4	856	8730	8480	66.88	59.29	-0.28	3
P41240	PF00017	SH2	75	8961.13	5.2	12	7	1237	16055	15930	32.37	79.2	-0.469	4	20.99	O60711	PF00412	LIM	56	6306.15	6.54	5	4	856	8730	8480	66.88	59.29	-0.28	3
P41240	PF00018	SH3 1	48	5318.14	8.9	5	7	756	8480	8480	14.35	83.33	-0.315	4	1.81	P17612	PF00069	Pkinase	255	29715.6	9.49	26	36	4227	39880	39880	31.81	92.86	-0.236	2
P29350	PF00102	Y_phosphatase	245	27781.5	6.09	27	24	3866	45630	45380	35.63	82.73	-0.459	4	1.73	P62993	PF00018	SH3 1	47	5438.11	4.85	10	8	760	8480	8480	23.19	72.77	-0.8	2
P29350	PF00017	SH2	76	8636.61	6.3	10	9	1202	111460	0	23.41	79.47	-0.475	4	1.74	P17252	PF00168	C2	107	12484.4	9.56	14	19	1765	24980	0	30.69	70.09	-0.824	4
P29350	PF00017	SH2	76	8636.61	6.3	10	9	1202	111460	0	23.41	79.47	-0.475	4	2.62	P17252	PF00130	C1_1	53	6193.25	8.82	2	6	841	5875	5500	48.92	40.38	0.134	2
P29350	PF00102	Y_phosphatase	245	27781.5	6.09	27	24	3866	45630	45380	35.63	82.73	-0.459	4	6.17	Q14289	PF00373	FERM_M	120	14427.7	8.53	16	18	2021	7575	7450	63.36	70.75	-0.588	4
P29350	PF00102	Y_phosphatase	245	27781.5	6.09	27	24	3866	45630	45380	35.63	82.73	-0.459	4	2	Q14289	PF07714	Pkinase_Tyr	255	29581.5	5.82	35	31	4171	51380	50880	52.15	96.24	-0.081	2
P29350	PF00017	SH2	76	8636.61	6.3	10	9	1202	111460	0	23.41	79.47	-0.475	4	2.39	Q14289	PF07714	Pkinase_Tyr	255	29581.5	5.82	35	31	4171	51380	50880	52.15	96.24	-0.081	2
P29350	PF00102	Y_phosphatase	245	27781.5	6.09	27	24	3866	45630	45380	35.63	82.73	-0.459	4	2	P43405	PF07714	Pkinase_Tyr	256	29440	7.55	32	33	4114	55600	55350	30.88	78.83	-0.389	2
P29350	PF00017	SH2	76	8636.61	6.3	10	9	1202	111460	0	23.41	79.47	-0.475	4	2.39	P43405	PF07714	Pkinase_Tyr	256	29440	7.55	32	33	4114	55600	55350	30.88	78.83	-0.389	2
P29350	PF00102	Y_phosphatase	245	27781.5	6.09	27	24	3866	45630	45380	35.63	82.73	-0.459	4	2.23	P15498	PF00307	CH	120	13979.4	7.59	11	12	1974	23865	23490	42.88	107.25	0.141	3
P29350	PF00017	SH2	76	8636.61	6.3	10	9	1202	111460	0	23.41	79.47	-0.475	4	2.62	P15498	PF00130	C1_1	53	6139.05	8.92	4	8	826	3355	2980	60.14	33.21	-0.63	4
P29350	PF00017	SH2	76	8636.61	6.3	10	9	1202	111460	0	23.41	79.47	-0.475	4	3.06	P15498	PF00621	RhoGEF	173	20375.7	7.9	24	25	2890	9065	8940	34.96	98.09	-0.408	1
P29350	PF00017	SH2	76	8636.61	6.3	10	9	1202	111460	0	23.41	79.47	-0.475	4	2.09	P15498	PF00307	CH	120	13979.4	7.59	11	12	1974	23865	23490	42.88	107.25	0.141	3
P29350	PF00102	Y_phosphatase	245	27781.5	6.09	27	24	3866	45630	45380	35.63	82.73	-0.459	4	3.01	P15498	PF00169	PH	102	12184	8.8	18	20	1711	15470	15470	41.2	73.63	-0.75	1
P29350	PF00017	SH2	76	8636.61	6.3	10	9	1202	111460	0	23.41	79.47	-0.475	4	2.61	P15498	PF00169	PH	102	12184	8.8	18	20	1711	15470	15470	41.2	73.63	-0.75	1
P29350	PF00017	SH2	76	8636.61	6.3	10	9	1202	111460	0	23.41	79.47	-0.475	4	1.73	P15498	PF00018	SH3 1	38	4419.89	4.42	6	3	606	16500	16500	27.68	64.21	-0.703	2
P29350	PF00102	Y_phosphatase	245	27781.5	6.09	27	24	3866	45630	45380	35.63	82.73	-0.459	4	3.22	P12814	PF00435	Spectrin	111	13421.4	5.74	18	16	1872	26595	26470	47.53	77.3	-0.864	4
P29350	PF00102	Y_phosphatase	245	27781.5	6.09	27	24	3866	45630	45380	35.63	82.73	-0.459	4	2.23	P12814	PF00307	CH	106	12008.2	9.78	12	18	1732	11000	11000	38.32	106.7	-0.097	4
P29350	PF00017	SH2	76	8636.61	6.3	10	9	1202	111460	0	23.41	79.47	-0.475	4	2.09	P12814	PF00307	CH	106	12008.2	9.78	12	18	1732	11000	11000	38.32	106.7	-0.097	4
Q15052	PF00169	PH	106	12191	4.75	14	9	1703	10095	9970	36.72	97.36	-0.078	3	21.75	Q9Y2X7	PF01412	ArfGap	119	13225.2	9.55	9	16	1854	18240	17990	41.85	83.61	-0.331	2
Q15052	PF00307	CH	112	12408.3	4.44	17	10	1753	7240	6990	41.91	103.48	0.016	3	26.48	Q13153	PF00786	PBD	59	6708.47	4.63	4	4	933	6990	0	51.85	77.63	-0.436	4
Q15052	PF00621	RhoGEF	175	19889.8	5.17	21	12	2780	7825	7450	49.09	92.46	-0.223	1	29.78	Q13153	PF00786	PBD	59	6708.47	4.63	4	4	933	6990	0	51.85	77.63	-0.436	4
Q15052	PF00169	PH	106	12191	4.75	14	9	1703	10095	9970	36.72	97.36	-0.078	3	10.03	Q13153	PF00786	PBD	59	6708.47	4.63	4	4	933	6990	0	51.85	77.63	-0.436	4
Q15052	PF00018	SH3 1	49	5727.23	5.15	7	6	785	19480	19480	21.43	57.55	-0.722	4	4.85	Q13153	PF00786	PBD	59	6708.47	4.63	4	4	933	6990	0	51.85	77.63	-0.436	4
Q15052	PF00018	SH3 1	49	5727.23	5.15	7	6	785	19480	19480	21.43	57.55	-0.722	4	1.81	Q13153	PF00069	Pkinase	252	28371.6	4.83	34	23	3983	30160	29910	39.46	93.61	-0.173	4
P50570	PF00169	PH	105	12441.2	6.78	17	17	1746	27960	27960	65.31	80.76	-0.606	5	3.66	P15498	PF00621	RhoGEF	173	20375.7	7.9	24	25	2890	9065	8940	34.96	98.09	-0.408	1
P50570	PF00169	PH	105	12441.2	6.78	17	17	1746	27960	27960	65.31	80.76	-0.606	5	2.01	P15498	PF00307	CH	120	13979.4	7.59	11	12	1974	23865	23490	42.88	107.25	0.141	3
P50570	PF00169	PH	105	12441.2	6.78	17	17	1746	27960	27960	65.31	80.76	-0.606	5	1.79	P15498	PF00169	PH	102	12184	8.8	18	20	1711	15470	15470	41.2	73.63	-0.75	1
P50570	PF00169	PH	105	12441.2	6.78	17	17	1746	27960	27960	65.31	80.76	-0.606	5	6.38	P22681	PF02262	Cbl_N	125	14848.5	9.46	15	22	2117	13075	12950	31.71	84.96	-0.525	4
P50570	PF00169	PH	105	12441.2	6.78	17	17	1746	27960	27960	65.31	80.76	-0.606	5	6.38	P22681	PF02761	Cbl_N2	84	9796.25	8.14	9	10	1378	23490	23490	23.32	84.88	-0.079	4
P50570	PF00169	PH	105	12441.2	6.78	17	17	1746	27960	27960	65.31	80.76	-0.606	5	6.38	P22681	PF02762	Cbl_N3	86	9890.32	8.85	7	9	1387	12950	12950	46.45	80.58	-0.307	4
P13688	PF00047	ig	81	9017.1	8.7	8	10	1252	12615	12490	31.64	60.12	-0.675	2	3.21	P29350	PF00102	Y_phosphatase	245	27781.5	6.09	27	24	3866	45630	45380	35.63	82.73	-0.459	4
P13688	PF00047	ig	81	9017.1	8.7	8	10	1252	12615	12490	31.64	60.12	-0.675	2	3.21	Q06124	PF00102	Y_phosphatase	252	29018.1	7.8	32	33	4054	37150	36900	35.25	78.77	-0.515	4
Q9NVD7	PF00307	CH	109	12521.7	5.69	16	14	1820	13980	0	34.42	131.38	-0.011	4	32.88	P49023	PF00412	LIM	56	6445.28	6.44	7	6	869	8730	8480	41.37	41.79	-0.646	4
Q9NVD7	PF00307	CH	109	12521.7	5.69	16	14	1820	13980	0	34.42	131.38	-0.011	4	17.03	Q9HBI1	PF00307	CH	110	12617.9	6.47	15	14	1831	17990	17990	43.37	136.36	0.126	4
P18433	PF00102	Y_phosphatase	236	27345.5	8.62	24	28	3815	44265	43890	22	76.69	-0.289	2	2	P12931	PF07714	Pkinase Tyr	250	28537.2	7.01	31	31	4023	44265	43890	41.6	86.96	-0.204	4
P12814	PF00307	CH	106	12008.2	9.78	12	18	1732	11000	11000	38.32	106.7	-0.097	4	2.55	Q7L3E0	PF07679	I-set	91	10196.4	5.05	14	9	1407	8730	8480	27.95	72.86	-0.467	2
P12814	PF00307	CH	106	12008.2	9.78	12	18	1732	11000	11000	38.32	106.7	-0.097	4	17.03	Q9HBI1	PF00307	CH	110	12617.9	6.47	15	14	1831	17990	17990	43.37	136.36	0.126	4
P12814	PF00435	Spectrin	111	13421.4	5.74	18	16	1872	26595	26470	47.53	77.3	-0.864	4	2.52	P07384	PF01067	Calpain_III	147	16998.1	8.68	21	23	2359	17085	16960	49.89	59.66	-0.654	4
P12814	PF00435	Spectrin	111	13421.4	5.74	18	16	1872	26595	26470	47.53	77.3	-0.864	4	2.52	P07384	PF00648	Peptidase_C2	298	33662	5.01	40	29	4687	75650	75400	20.5	82.75	-0.256	4
P12814	PF00307	CH	106	12008.2	9.78	12	18	1732	11000	11000	38.32	106.7	-0.097	4	32.88	Q15942	PF00412	LIM	58	6433.33	6.96	3	3	870	4845	4470	59.27	64.14	-0.15	1
P12814	PF00307	CH	106	12008.2	9.78	12	18	1732	11000	11000	38.32	106.7	-0.097	4	32.88	P21291	PF00412	LIM	57	6441.46	7.69	6	7	875	6460	5960	37.75	54.56	-0.168	1
P12814	PF00307	CH	106	12008.2	9.78	12	18	1732	11000	11000	38.32	106.7	-0.097	4	32.88	Q9UGI8	PF00412	LIM	62	7338.48	5.83	9	7	988	20440	19940	53.45	59.84	-0.277	2
P40763	PF01017	STAT_alpha	173	20375.3	5.33	27	23	2864	15595	15470	62.53	87.86	-0.775	4	2.84	P17706	PF00102	Y_phosphatase	233	26905.7	6.41	27	25	3753	37150	36900	37.32	83.61	-0.372	2
P40763	PF01017	STAT_alpha	173	20375.3	5.33	27	23	2864	15595	15470	62.53	87.86	-0.775	4	2.39	P43405	PF07714	Pkinase_Tyr	256	29440	7.55	32	33	4114	55600	55350	30.88	78.83	-0.389	2
P40763	PF01017	STAT_alpha	173	20375.3	5.33	27	23	2864	15595	15470	62.53	87.86	-0.775	4	2.84	Q06124	PF00102	Y_phosphatase	252	29018.1	7.8	32	33	4054	37150	36900	35.25	78.77	-0.515	4
P46109	PF00018	SH3 1	47	5459.22	4.85	9	7	769	12490	0	61.21	80.85	-0.651	1	3.12	Q13905	PF00617	RasGEF	171	20057.1	5.69	23	20	2842	32555	32430	53.18	101.58	-0.267	4
P46109	PF00018	SH3 1	47	5459.22	4.85	9	7	769	12490	0	61.21	80.85	-0.651	1	3.2	Q13905	PF00618	RasGEF_N	117	13651	6.8	18	18	1966	6085	5960	36.52	116.5	0.107	5
P46109	PF00017	SH2	75	8745.83	7.02	8	8	1209	11460	11460	70.99	74	-0.548	4	3.3	Q13905	PF00617	RasGEF	171	20057.1	5.69	23	20	2842	32555	32430	53.18	101.58	-0.267	4
P46109	PF00017	SH2	75	8745.83	7.02	8	8	1209	11460	11460	70.99	74	-0.548	4	3.44	Q13905	PF00618	RasGEF_N	117	13651	6.8	18	18	1966	6085	5960	36.52	116.5	0.107	5
P46109	PF00018	SH3 1	47	5459.22	4.85	9	7	769	12490	0	61.21	80.85	-0.651	1	3.73	P29353	PF00640	PID	157	17268.9	9	13	18	2425	7825	7450	53.52	87.64	-0.078	4
P46109	PF00017	SH2	75	8745.83	7.02	8	8	1209	11460	11460	70.99	74	-0.548	4	4.74	P29353	PF00640	PID	157	17268.9	9	13	18	2425	7825	7450	53.52	87.64	-0.078	4
P46109	PF07653	SH3_2	56	6306.4	9.65	5	9	902	6990	6990	18.33	88.75	-0.096	1	1.6	P56945	PF08824	Serine_rich	155	16272.3	5.76	18	13	2291	5500	5500	49.48	100.26	-0.056	2
P46109	PF00018	SH3 1	47	5459.22	4.85	9	7	769	12490	0	61.21	80.85	-0.651	1	27.54	P56945	PF08824	Serine_rich	155	16272.3	5.76	18	13	2291	5500	5500	49.48	100.26	-0.056	2
P46109	PF00017	SH2	75	8745.83	7.02	8	8	1209	11460	11460	70.99	74	-0.548	4	24.78	P56945	PF08824	Serine_rich	155	16272.3	5.76	18	13	2291	5500	5500	49.48	100.26	-0.056	2
P46109	PF00017	SH2	75	8745.83	7.02	8	8	1209	11460	11460	70.99	74	-0.548	4	1.78	P56945	PF00018	SH3 1	49	5447.1	4.45	8	4	754	12490	12490	34.24	85.51	-0.394	3
P46109	PF00018	SH3 1	47	5459.22	4.85	9	7	769	12490	0	61.21	80.85	-0.651	1	18.95	P49023	PF00412	LIM	56	6445.28	6.44	7	6	869	8730	8480	41.37	41.79	-0.646	4
P46109	PF00017	SH2	75	8745.83	7.02	8	8	1209	11460	11460	70.99	74	-0.548	4	20.99	P49023	PF00412	LIM	56	6445.28	6.44	7	6	869	8730	8480	41.37	41.79	-0.646	4
P46109	PF07653	SH3_2	56	6306.4	9.65	5	9	902	6990	6990	18.33	88.75	-0.096	1	1.6	Q14511	PF08824	Serine_rich	157	17938.6	5.72	22	18	2522	15720	15470	55.67	96.31	-0.305	2
P46109	PF00018	SH3 1	47	5459.22	4.85	9	7	769	12490	0	61.21	80.85	-0.651	1	27.54	Q14511	PF08824	Serine_rich	157	17938.6	5.72	22	18	2522	15720	15470	55.67	96.31	-0.305	2
P46109	PF00017	SH2	75	8745.83	7.02	8	8	1209	11460	11460	70.99	74	-0.548	4	24.78	Q14511	PF08824	Serine_rich	157	17938.6	5.72	22	18	2522	15720	15470	55.67	96.31	-0.305	2
P46109	PF00017	SH2	75	8745.83	7.02	8	8	1209	11460	11460	70.99	74	-0.548	4	1.73	Q14511	PF00018	SH3 9	51	5651.99	3.35	12	1	755	11460	0	27.67	64.9	-0.516	2
Q07954	PF07645	EGF_CA	39	4244.65	3.66	6	1	556	335	2980	50.1	54.87	-0.146	2	1.97	P12931	PF07714	Pkinase Tyr	250	28537.2	7.01	31	31	4023	44265	43890	41.6	86.96	-0.204	4
Q07954	PF00058	Ldl_recept_b	41	4547.08	4.72	8	6	607	5875	5500	60.11	33.41	-0.917	2	5.52	P12931	PF07714	Pkinase Tyr	250	28537.2	7.01	31	31	4023	44265	43890	41.6	86.96	-0.204	4
Q07954	PF00057	Ldl_recept_a	40	4449.96	4.72	8	6	593	5875	5500	56.55	34.25	-0.9	2	8.57	P29353	PF00640	PID	157	17268.9	9	13	18	2425	7825	7450	53.52	87.64	-0.078	4
Q07954	PF00058	Ldl_recept_b	41	4547.08	4.72	8	6	607	5875	5500	60.11	33.41	-0.917	2	9.26	P29353	PF00640	PID	157	17268.9	9	13	18	2425	7825	7450	53.52	87.64	-0.078	4
Q07954	PF07645	EGF_CA	39	4244.65	3.66	6	1	556	335	2980	50.1	54.87	-0.146	2	1.97	Q13418	PF07714	Pkinase_Tyr	254	28914.7	8.6	27	30	4068	43220	42970	51.17	85.59	-0.194	5
Q07954	PF00058	Ldl_recept_b	41	4547.08	4.72	8	6	607	5875	5500	60.11	33.41	-0.917	2	5.52	Q13418	PF07714	Pkinase_Tyr	254	28914.7	8.6	27	30	4068	43220	42970	51.17	85.59	-0.194	5
Q9ULH1	PF00169	PH	92	10634.1	9.61	10	17	1503	15595	15470	25.35	76.3	-0.866	4	1.63	Q05397	PF07714	Pkinase_Tyr	255	29112.9	8.73	26	31	4095	42900	42400	57.74	88.31	-0.132	2
Q9ULH1	PF00018	SH3 1	50	5737.26	3.97	13	3	786	12490	12490	56.6	79.8	-0.574	5	1.56	Q05397	PF07714	Pkinase_Tyr	255	29112.9	8.73	26	31	4095	42900	42400	57.74	88.31	-0.132	2
Q9ULH1	PF00169	PH	92	10634.1	9.61	10	17	1503	15595	15470	25.35	76.3	-0.866	4	1.63	P12931	PF07714	Pkinase Tyr	250	28537.2	7.01	31	31	4023	44265	43890	41.6	86.96	-0.204	4
Q9ULH1	PF00018	SH3 1	50	5737.26	3.97	13	3	786	12490	12490	56.6	79.8	-0.574	5	1.56	P12931	PF07714	Pkinase Tyr	250	28537.2	7.01	31	31	4023	44265	43890	41.6	86.96	-0.204	4
Q9ULH1	PF00018	SH3 1	50	5737.26	3.97	13	3	786	12490	12490	56.6	79.8	-0.574	5	18.95	O60711	PF00412	LIM	56	6306.15	6.54	5	4	856	8730	8480	66.88	59.29	-0.28	3
Q9ULH1	PF00018	SH3 1	50	5737.26	3.97	13	3	786	12490	12490	56.6	79.8	-0.574	5	40.28	Q14247	PF02218	HS1_rep	36	3958.35	6.92	5	5	539	2980	2980	24.24	45.83	-0.931	5
Q9ULH1	PF00169	PH	92	10634.1	9.61	10	17	1503	15595	15470	25.35	76.3	-0.866	4	1.63	Q14289	PF07714	Pkinase_Tyr	255	29581.5	5.82	35	31	4171	51380	50880	52.15	96.24	-0.081	2
Q9ULH1	PF00018	SH3 1	50	5737.26	3.97	13	3	786	12490	12490	56.6	79.8	-0.574	5	1.56	Q14289	PF07714	Pkinase_Tyr	255	29581.5	5.82	35	31	4171	51380	50880	52.15	96.24	-0.081	2
Q9ULH1	PF00169	PH	92	10634.1	9.61	10	17	1503	15595	15470	25.35	76.3	-0.866	4	7.89	P05556	PF00362	Integrin_beta	245	27247.8	4.91	28	19	3796	23630	23380	40.36	86.69	-0.173	2
Q9ULH1	PF00169	PH	92	10634.1	9.61	10	17	1503	15595	15470	25.35	76.3	-0.866	4	7.98	P05556	PF07965	Integrin_B_tail	89	10217.4	4.91	16	10	1378	10470	9970	51.49	43.6	-0.873	2
Q9ULH1	PF00169	PH	92	10634.1	9.61	10	17	1503	15595	15470	25.35	76.3	-0.866	4	8.08	P05556	PF08725	Integrin_b_cyt	45	5370.23	9.11	7	9	762	8480	0	17.19	69.33	-0.8	2
Q9ULH1	PF00169	PH	92	10634.1	9.61	10	17	1503	15595	15470	25.35	76.3	-0.866	4	13.02	P05556	PF07974	EGF_2	32	3353.81	6.14	3	3	441	375	0	18.91	36.56	-0.338	2
Q9BX66	PF07653	SH3_2	54	6435.4	8.62	7	8	914	11460	0	18.5	88.52	-0.585	2	1.72	P06213	PF07714	Pkinase Tyr	268	30260.9	5.82	34	30	4237	34170	33920	36.38	83.99	-0.208	2
Q9BX66	PF00018	SH3 1	48	5616.36	8.49	6	7	787	6990	0	10.56	71.04	-0.625	2	1.56	P06213	PF07714	Pkinase Tyr	268	30260.9	5.82	34	30	4237	34170	33920	36.38	83.99	-0.208	2
Q9BX66	PF00018	SH3 1	48	5616.36	8.49	6	7	787	6990	0	10.56	71.04	-0.625	2	18.95	O60711	PF00412	LIM	56	6306.15	6.54	5	4	856	8730	8480	66.88	59.29	-0.28	3
Q9BX66	PF00018	SH3 1	48	5616.36	8.49	6	7	787	6990	0	10.56	71.04	-0.625	2	3.12	Q07889	PF00617	RasGEF	190	22157.5	6.09	27	24	3159	18575	18450	60.26	104.58	-0.316	1
Q9BX66	PF00018	SH3 1	48	5616.36	8.49	6	7	787	6990	0	10.56	71.04	-0.625	2	3.2	Q07889	PF00618	RasGEF_N	118	14275.4	5.82	19	16	2014	14565	14440	51.21	92.54	-0.388	1
Q9BX66	PF00018	SH3 1	48	5616.36	8.49	6	7	787	6990	0	10.56	71.04	-0.625	2	2.25	Q07889	PF00621	RhoGEF	178	20431.3	4.78	31	17	2877	10555	10430	54.63	102.42	-0.19	1
Q9BX66	PF00018	SH3 1	48	5616.36	8.49	6	7	787	6990	0	10.56	71.04	-0.625	2	1.93	Q07889	PF00169	PH	119	13731.6	6.1	18	16	1903	15720	15470	21.33	73.03	-0.555	1
Q9BX66	PF00018	SH3 1	48	5616.36	8.49	6	7	787	6990	0	10.56	71.04	-0.625	2	20.55	Q05397	PF03623	Focal_AT	133	14817.3	5.68	17	15	2127	5960	0	44.65	110.75	-0.109	1
Q9BX66	PF00018	SH3 1	48	5616.36	8.49	6	7	787	6990	0	10.56	71.04	-0.625	2	1.72	Q05397	PF07714	Pkinase_Tyr	255	29112.9	8.73	26	31	4095	42900	42400	57.74	88.31	-0.132	2
Q9BX66	PF00018	SH3 1	48	5616.36	8.49	6	7	787	6990	0	10.56	71.04	-0.625	2	1.56	Q05397	PF07714	Pkinase_Tyr	255	29112.9	8.73	26	31	4095	42900	42400	57.74	88.31	-0.132	2
P35568	PF00169	PH	108	12525.1	9.55	14	20	1751	18450	18450	66.42	65.19	-0.872	4	1.66	P31749	PF00433	Pkinase_C	46	5463.88	4.02	11	3	729	2980	2980	62.05	31.74	-0.987	1
P35568	PF00169	PH	108	12525.1	9.55	14	20	1751	18450	18450	66.42	65.19	-0.872	4	1.79	P31749	PF00169	PH	103	12397.1	7.99	15	16	1737	26595	26470	33.61	70	-0.795	4
P35568	PF02174	IRS	103	11591.5	8.01	10	11	1638	12615	12490	38.31	95.53	0.108	4	15.25	Q05397	PF07714	Pkinase_Tyr	255	29112.9	8.73	26	31	4095	42900	42400	57.74	88.31	-0.132	2
P35568	PF00169	PH	108	12525.1	9.55	14	20	1751	18450	18450	66.42	65.19	-0.872	4	1.63	Q05397	PF07714	Pkinase_Tyr	255	29112.9	8.73	26	31	4095	42900	42400	57.74	88.31	-0.132	2
P35568	PF02174	IRS	103	11591.5	8.01	10	11	1638	12615	12490	38.31	95.53	0.108	4	15.25	P06213	PF07714	Pkinase Tyr	268	30260.9	5.82	34	30	4237	34170	33920	36.38	83.99	-0.208	2
P35568	PF00169	PH	108	12525.1	9.55	14	20	1751	18450	18450	66.42	65.19	-0.872	4	2.87	P06213	PF00757	Furin-like	162	18083.6	7.77	13	15	2413	20075	18450	56.85	45.68	-0.491	2
P35568	PF00169	PH	108	12525.1	9.55	14	20	1751	18450	18450	66.42	65.19	-0.872	4	3.29	P06213	PF01030	Recep_L_domain	113	13348.8	7.98	12	13	1915	13075	12950	36.01	124.16	0.303	2
P35568	PF00169	PH	108	12525.1	9.55	14	20	1751	18450	18450	66.42	65.19	-0.872	4	1.63	P06213	PF07714	Pkinase Tyr	268	30260.9	5.82	34	30	4237	34170	33920	36.38	83.99	-0.208	2
P35568	PF02174	IRS	103	11591.5	8.01	10	11	1638	12615	12490	38.31	95.53	0.108	4	15.25	P41240	PF07714	Pkinase_Tyr	246	27472.8	7.75	31	32	3885	35660	35410	32.98	92.68	-0.14	4
P35568	PF00169	PH	108	12525.1	9.55	14	20	1751	18450	18450	66.42	65.19	-0.872	4	1.63	P41240	PF07714	Pkinase_Tyr	246	27472.8	7.75	31	32	3885	35660	35410	32.98	92.68	-0.14	4
Q96EX0	PF00018	SH3 1	46	5414.17	9.11	6	8	765	9970	0	-4.04	74.13	-0.676	2	2.62	P12814	PF08726	EFhand_Ca_insen	67	7399.29	4.11	11	5	1014	7450	7450	36.35	67.16	-0.33	4
Q96EX0	PF00018	SH3 1	46	5414.17	9.11	6	8	765	9970	0	-4.04	74.13	-0.676	2	2.02	P12814	PF00435	Spectrin	111	13421.4	5.74	18	16	1872	26595	26470	47.53	77.3	-0.864	4
Q96EX0	PF00018	SH3 1	46	5414.17	9.11	6	8	765	9970	0	-4.04	74.13	-0.676	2	1.79	P12814	PF00307	CH	106	12008.2	9.78	12	18	1732	11000	11000	38.32	106.7	-0.097	4
Q96EX0	PF02208	Sorb	45	5190.88	6.31	7	6	721	8480	0	28.93	56.22	-0.913	5	53.28	P22681	PF02262	Cbl_N	125	14848.5	9.46	15	22	2117	13075	12950	31.71	84.96	-0.525	4
Q96EX0	PF02208	Sorb	45	5190.88	6.31	7	6	721	8480	0	28.93	56.22	-0.913	5	54.28	P22681	PF02762	Cbl_N3	86	9890.32	8.85	7	9	1387	12950	12950	46.45	80.58	-0.307	4
Q96EX0	PF02208	Sorb	45	5190.88	6.31	7	6	721	8480	0	28.93	56.22	-0.913	5	55.28	P22681	PF02761	Cbl_N2	84	9796.25	8.14	9	10	1378	23490	23490	23.32	84.88	-0.079	4
Q96EX0	PF00018	SH3 1	46	5414.17	9.11	6	8	765	9970	0	-4.04	74.13	-0.676	2	2.83	P22681	PF00627	UBA	47	5272.97	4.59	5	3	742	2980	0	103.58	103.83	-0.151	4
Q96EX0	PF00018	SH3 1	46	5414.17	9.11	6	8	765	9970	0	-4.04	74.13	-0.676	2	9.54	P22681	PF02262	Cbl_N	125	14848.5	9.46	15	22	2117	13075	12950	31.71	84.96	-0.525	4
Q96EX0	PF00018	SH3 1	46	5414.17	9.11	6	8	765	9970	0	-4.04	74.13	-0.676	2	10.54	P22681	PF02762	Cbl_N3	86	9890.32	8.85	7	9	1387	12950	12950	46.45	80.58	-0.307	4
Q96EX0	PF00018	SH3 1	46	5414.17	9.11	6	8	765	9970	0	-4.04	74.13	-0.676	2	11.54	P22681	PF02761	Cbl_N2	84	9796.25	8.14	9	10	1378	23490	23490	23.32	84.88	-0.079	4
Q96EX0	PF00018	SH3 1	46	5414.17	9.11	6	8	765	9970	0	-4.04	74.13	-0.676	2	1.91	P50570	PF02212	GED	92	10704.3	5.73	13	10	1508	5960	0	55.8	107.17	-0.248	1
Q96EX0	PF00018	SH3 1	46	5414.17	9.11	6	8	765	9970	0	-4.04	74.13	-0.676	2	1.91	P50570	PF01031	Dynamin_M	287	33434.4	9.22	42	49	4758	10555	10430	46.18	92.06	-0.587	5
Q96EX0	PF00018	SH3 1	46	5414.17	9.11	6	8	765	9970	0	-4.04	74.13	-0.676	2	1.93	P50570	PF00169	PH	105	12441.2	6.78	17	17	1746	27960	27960	65.31	80.76	-0.606	5
Q96EX0	PF00018	SH3 1	46	5414.17	9.11	6	8	765	9970	0	-4.04	74.13	-0.676	2	18.95	O60711	PF00412	LIM	56	6306.15	6.54	5	4	856	8730	8480	66.88	59.29	-0.28	3
Q96EX0	PF02208	Sorb	45	5190.88	6.31	7	6	721	8480	0	28.93	56.22	-0.913	5	20.55	Q14289	PF03623	Focal_AT	133	14625.9	5.16	18	15	2101	3105	2980	38.36	120.9	-0.042	1
Q96EX0	PF00018	SH3 1	46	5414.17	9.11	6	8	765	9970	0	-4.04	74.13	-0.676	2	1.56	Q14289	PF07714	Pkinase_Tyr	255	29581.5	5.82	35	31	4171	51380	50880	52.15	96.24	-0.081	2
Q16827	PF00041	fn3	88	9789.17	9.04	5	8	1385	11585	11460	43.77	88.41	-0.36	2	2.01	P41240	PF07714	Pkinase_Tyr	246	27472.8	7.75	31	32	3885	35660	35410	32.98	92.68	-0.14	4
Q16827	PF00102	Y_phosphatase	233	27340	5.46	31	22	3765	40255	39880	55.94	74.46	-0.482	2	2	P41240	PF07714	Pkinase_Tyr	246	27472.8	7.75	31	32	3885	35660	35410	32.98	92.68	-0.14	4
Q16827	PF00041	fn3	88	9789.17	9.04	5	8	1385	11585	11460	43.77	88.41	-0.36	2	2.74	Q13480	PF00169	PH	111	13222.3	8.83	16	20	1860	29700	29450	58.48	85.14	-0.5	9
Q16827	PF00102	Y_phosphatase	233	27340	5.46	31	22	3765	40255	39880	55.94	74.46	-0.482	2	3.01	Q13480	PF00169	PH	111	13222.3	8.83	16	20	1860	29700	29450	58.48	85.14	-0.5	9
Q16827	PF00041	fn3	88	9789.17	9.04	5	8	1385	11585	11460	43.77	88.41	-0.36	2	3.19	Q13480	PF00757	Furin-like	162	18083.6	7.77	13	15	2413	20075	18450	56.85	45.68	-0.491	2
Q16827	PF00041	fn3	88	9789.17	9.04	5	8	1385	11585	11460	43.77	88.41	-0.36	2	3.19	Q13480	PF01030	Recep_L_domain	113	13348.8	7.98	12	13	1915	13075	12950	36.01	124.16	0.303	2
Q16827	PF00102	Y_phosphatase	233	27340	5.46	31	22	3765	40255	39880	55.94	74.46	-0.482	2	13.93	Q13480	PF00757	Furin-like	162	18083.6	7.77	13	15	2413	20075	18450	56.85	45.68	-0.491	2
Q16827	PF00102	Y_phosphatase	233	27340	5.46	31	22	3765	40255	39880	55.94	74.46	-0.482	2	14.63	Q13480	PF01030	Recep_L_domain	113	13348.8	7.98	12	13	1915	13075	12950	36.01	124.16	0.303	2
Q16827	PF00041	fn3	88	9789.17	9.04	5	8	1385	11585	11460	43.77	88.41	-0.36	2	2.01	Q13480	PF07714	Pkinase Tyr	268	30260.9	5.82	34	30	4237	34170	33920	36.38	83.99	-0.208	2
Q16827	PF00102	Y_phosphatase	233	27340	5.46	31	22	3765	40255	39880	55.94	74.46	-0.482	2	2	Q13480	PF07714	Pkinase Tyr	268	30260.9	5.82	34	30	4237	34170	33920	36.38	83.99	-0.208	2
Q16827	PF00041	fn3	88	9789.17	9.04	5	8	1385	11585	11460	43.77	88.41	-0.36	2	3.19	P06213	PF00757	Furin-like	162	18083.6	7.77	13	15	2413	20075	18450	56.85	45.68	-0.491	2
Q16827	PF00041	fn3	88	9789.17	9.04	5	8	1385	11585	11460	43.77	88.41	-0.36	2	3.19	P06213	PF01030	Recep_L_domain	113	13348.8	7.98	12	13	1915	13075	12950	36.01	124.16	0.303	2
Q16827	PF00102	Y_phosphatase	233	27340	5.46	31	22	3765	40255	39880	55.94	74.46	-0.482	2	13.93	P06213	PF00757	Furin-like	162	18083.6	7.77	13	15	2413	20075	18450	56.85	45.68	-0.491	2
Q16827	PF00102	Y_phosphatase	233	27340	5.46	31	22	3765	40255	39880	55.94	74.46	-0.482	2	14.63	P06213	PF01030	Recep_L_domain	113	13348.8	7.98	12	13	1915	13075	12950	36.01	124.16	0.303	2
Q16827	PF00041	fn3	88	9789.17	9.04	5	8	1385	11585	11460	43.77	88.41	-0.36	2	2.01	P06213	PF07714	Pkinase Tyr	268	30260.9	5.82	34	30	4237	34170	33920	36.38	83.99	-0.208	2
Q16827	PF00041	fn3	88	9789.17	9.04	5	8	1385	11585	11460	43.77	88.41	-0.36	2	2	P06213	PF07714	Pkinase Tyr	268	30260.9	5.82	34	30	4237	34170	33920	36.38	83.99	-0.208	2
P18031	PF00102	Y_phosphatase	237	27615.7	6.73	32	31	3868	34170	33920	37.5	81.39	-0.47	2	3.22	P12814	PF00435	Spectrin	111	13421.4	5.74	18	16	1872	26595	26470	47.53	77.3	-0.864	4
P18031	PF00102	Y_phosphatase	237	27615.7	6.73	32	31	3868	34170	33920	37.5	81.39	-0.47	2	2.23	P12814	PF00307	CH	106	12008.2	9.78	12	18	1732	11000	11000	38.32	106.7	-0.097	4
P18031	PF00102	Y_phosphatase	237	27615.7	6.73	32	31	3868	34170	33920	37.5	81.39	-0.47	2	2	P12931	PF07714	Pkinase Tyr	250	28537.2	7.01	31	31	4023	44265	43890	41.6	86.96	-0.204	4
P18031	PF00102	Y_phosphatase	237	27615.7	6.73	32	31	3868	34170	33920	37.5	81.39	-0.47	2	30.8	P35568	PF02174	IRS	103	11591.5	8.01	10	11	1638	12615	12490	38.31	95.53	0.108	4
P18031	PF00102	Y_phosphatase	237	27615.7	6.73	32	31	3868	34170	33920	37.5	81.39	-0.47	2	3.01	P35568	PF00169	PH	108	12525.1	9.55	14	20	1751	18450	18450	66.42	65.19	-0.872	4
P18031	PF00102	Y_phosphatase	237	27615.7	6.73	32	31	3868	34170	33920	37.5	81.39	-0.47	2	3.01	P31749	PF00169	PH	103	12397.1	7.99	15	16	1737	26595	26470	33.61	70	-0.795	4
P18031	PF00102	Y_phosphatase	237	27615.7	6.73	32	31	3868	34170	33920	37.5	81.39	-0.47	2	76.66	Q03135	PF01146	Caveolin	134	15521	5.64	15	11	2198	31065	30940	23.41	110.52	0.383	9
P18031	PF00102	Y_phosphatase	237	27615.7	6.73	32	31	3868	34170	33920	37.5	81.39	-0.47	2	13.93	P06213	PF00757	Furin-like	162	18083.6	7.77	13	15	2413	20075	18450	56.85	45.68	-0.491	2
P18031	PF00102	Y_phosphatase	237	27615.7	6.73	32	31	3868	34170	33920	37.5	81.39	-0.47	2	14.63	P06213	PF01030	Recep_L_domain	113	13348.8	7.98	12	13	1915	13075	12950	36.01	124.16	0.303	2
P18031	PF00102	Y_phosphatase	237	27615.7	6.73	32	31	3868	34170	33920	37.5	81.39	-0.47	2	2	P06213	PF07714	Pkinase Tyr	268	30260.9	5.82	34	30	4237	34170	33920	36.38	83.99	-0.208	2
Q15942	PF00412	LIM	58	6433.33	6.96	3	3	870	4845	4470	59.27	64.14	-0.15	1	1.86	Q8N8S7	PF00568	WH1	108	12124.7	9.51	7	12	1674	17085	16960	35	66.85	-0.409	1
Q15942	PF00412	LIM	58	6433.33	6.96	3	3	870	4845	4470	59.27	64.14	-0.15	1	6.25	Q8N8S7	PF08776	VASP_tetra	37	4434.08	4.89	10	8	637	1490	0	41.2	108.11	-0.951	1
Q15942	PF00412	LIM	58	6433.33	6.96	3	3	870	4845	4470	59.27	64.14	-0.15	1	2.56	P15498	PF00621	RhoGEF	173	20375.7	7.9	24	25	2890	9065	8940	34.96	98.09	-0.408	1
Q15942	PF00412	LIM	58	6433.33	6.96	3	3	870	4845	4470	59.27	64.14	-0.15	1	1.86	P50552	PF08776	VASP_tetra	37	4573.31	6.45	9	9	666	1490	0	88.25	107.84	-0.949	9
Q15942	PF00412	LIM	58	6433.33	6.96	3	3	870	4845	4470	59.27	64.14	-0.15	1	2.65	P50552	PF00568	WH1	110	12232.9	9.69	7	12	1693	21095	20970	40.92	66.55	-0.365	1
Q14847	PF00412	LIM	57	6781.98	9.16	4	11	929	13325	12950	45.33	35.96	-0.837	1	150.91	Q93052	PF00412	LIM	58	6428.42	5.61	6	5	871	4970	4470	25.94	65.52	0.031	1
Q14847	PF00018	SH3 9	51	5651.99	3.35	12	1	755	11460	0	27.67	64.9	-0.516	2	18.95	Q93052	PF00412	LIM	58	6428.42	5.61	6	5	871	4970	4470	25.94	65.52	0.031	1
Q14847	PF00018	SH3 9	51	5651.99	3.35	12	1	755	11460	0	27.67	64.9	-0.516	2	1.81	P17612	PF00069	Pkinase	255	29715.6	9.49	26	36	4227	39880	39880	31.81	92.86	-0.236	2
P15498	PF00169	PH	102	12184	8.8	18	20	1711	15470	15470	41.2	73.63	-0.75	1	6.38	P22681	PF02262	Cbl_N	125	14848.5	9.46	15	22	2117	13075	12950	31.71	84.96	-0.525	4
P15498	PF00169	PH	102	12184	8.8	18	20	1711	15470	15470	41.2	73.63	-0.75	1	6.38	P22681	PF02761	Cbl_N2	84	9796.25	8.14	9	10	1378	23490	23490	23.32	84.88	-0.079	4
P15498	PF00018	SH3 1	38	4419.89	4.42	6	3	606	16500	16500	27.68	64.21	-0.703	2	6.38	P22681	PF02762	Cbl_N3	86	9890.32	8.85	7	9	1387	12950	12950	46.45	80.58	-0.307	4
P15498	PF00018	SH3 1	38	4419.89	4.42	6	3	606	16500	16500	27.68	64.21	-0.703	2	2.83	P22681	PF00627	UBA	47	5272.97	4.59	5	3	742	2980	0	103.58	103.83	-0.151	4
P15498	PF00017	SH2	75	8598.93	9.06	10	12	1222	11460	0	32.37	88.53	-0.211	2	5.21	P22681	PF02262	Cbl_N	125	14848.5	9.46	15	22	2117	13075	12950	31.71	84.96	-0.525	4
P15498	PF00017	SH2	75	8598.93	9.06	10	12	1222	11460	0	32.37	88.53	-0.211	2	5.21	P22681	PF02761	Cbl_N2	84	9796.25	8.14	9	10	1378	23490	23490	23.32	84.88	-0.079	4
P15498	PF00017	SH2	75	8598.93	9.06	10	12	1222	11460	0	32.37	88.53	-0.211	2	5.21	P22681	PF02762	Cbl_N3	86	9890.32	8.85	7	9	1387	12950	12950	46.45	80.58	-0.307	4
P15498	PF00018	SH3 1	38	4419.89	4.42	6	3	606	16500	16500	27.68	64.21	-0.703	2	9.54	P22681	PF02262	Cbl_N	125	14848.5	9.46	15	22	2117	13075	12950	31.71	84.96	-0.525	4
P15498	PF00018	SH3 1	38	4419.89	4.42	6	3	606	16500	16500	27.68	64.21	-0.703	2	9.54	P22681	PF02761	Cbl_N2	84	9796.25	8.14	9	10	1378	23490	23490	23.32	84.88	-0.079	4
P15498	PF00018	SH3 1	38	4419.89	4.42	6	3	606	16500	16500	27.68	64.21	-0.703	2	9.54	P22681	PF02762	Cbl_N3	86	9890.32	8.85	7	9	1387	12950	12950	46.45	80.58	-0.307	4
Q13153	PF00069	Pkinase	252	28371.6	4.83	34	23	3983	30160	29910	39.46	93.61	-0.173	4	1.69	P19174	PF00168	C2	106	11892.7	6.12	12	11	1675	10095	9970	36.59	82.74	-0.049	4
Q13153	PF00069	Pkinase	252	28371.6	4.83	34	23	3983	30160	29910	39.46	93.61	-0.173	4	1.76	P31749	PF00433	Pkinase_C	46	5463.88	4.02	11	3	729	2980	2980	62.05	31.74	-0.987	1
Q13153	PF00069	Pkinase	252	28371.6	4.83	34	23	3983	30160	29910	39.46	93.61	-0.173	4	1.6	P31749	PF00169	PH	103	12397.1	7.99	15	16	1737	26595	26470	33.61	70	-0.795	4
Q13153	PF00069	Pkinase	252	28371.6	4.83	34	23	3983	30160	29910	39.46	93.61	-0.173	4	2.13	Q15052	PF00621	RhoGEF	175	19889.8	5.17	21	12	2780	7825	7450	49.09	92.46	-0.223	1
Q13153	PF00069	Pkinase	252	28371.6	4.83	34	23	3983	30160	29910	39.46	93.61	-0.173	4	1.6	Q15052	PF00169	PH	106	12191	4.75	14	9	1703	10095	9970	36.72	97.36	-0.078	3
Q15426	PF00041	fn3	79	8367.96	3.97	9	3	1136	19605	19480	15.01	60.25	-0.596	3	2.01	P12931	PF07714	Pkinase Tyr	250	28537.2	7.01	31	31	4023	44265	43890	41.6	86.96	-0.204	4
Q15426	PF00102	Y_phosphatase	235	27190.2	6.32	24	21	3796	58690	58440	52.13	85.36	-0.313	2	2	P12931	PF07714	Pkinase Tyr	250	28537.2	7.01	31	31	4023	44265	43890	41.6	86.96	-0.204	4
Q15426	PF00041	fn3	79	8367.96	3.97	9	3	1136	19605	19480	15.01	60.25	-0.596	3	2.43	Q05397	PF03623	Focal_AT	133	14817.3	5.68	17	15	2127	5960	0	44.65	110.75	-0.109	1
Q15426	PF00041	fn3	79	8367.96	3.97	9	3	1136	19605	19480	15.01	60.25	-0.596	3	2.01	Q05397	PF07714	Pkinase_Tyr	255	29112.9	8.73	26	31	4095	42900	42400	57.74	88.31	-0.132	2
Q15426	PF00102	Y_phosphatase	235	27190.2	6.32	24	21	3796	58690	58440	52.13	85.36	-0.313	2	6.17	Q05397	PF00373	FERM_M	125	15004.3	8.52	19	21	2128	13075	12950	48.15	86.56	-0.499	9
Q15426	PF00102	Y_phosphatase	235	27190.2	6.32	24	21	3796	58690	58440	52.13	85.36	-0.313	2	2	Q05397	PF07714	Pkinase_Tyr	255	29112.9	8.73	26	31	4095	42900	42400	57.74	88.31	-0.132	2
Q13136	PF07647	SAM_2	71	8008.21	4.8	8	5	1148	12490	0	31.24	134.65	0.308	10	1.72	Q9Y2X7	PF08518	GIT_SHD	29	3481.93	5.1	7	6	490	1490	0	46.74	84.14	-0.986	9
P21291	PF00412	LIM	57	6441.46	7.69	6	7	875	6460	5960	37.75	54.56	-0.168	1	150.91	Q15942	PF00412	LIM	58	6433.33	6.96	3	3	870	4845	4470	59.27	64.14	-0.15	1
P78324	PF07686	V-set	108	11747.3	9.07	11	14	1649	10095	9970	20.65	72.22	-0.369	2	11.73	Q08722	PF08204	V-set_CD47	135	15057.1	5.17	17	14	2100	17210	16960	21.5	77.19	-0.19	2
P78324	PF07654	C1-set	84	9167.21	5.88	9	6	1273	7115	6990	13.69	79.88	-0.157	2	12.46	Q08722	PF08204	V-set_CD47	135	15057.1	5.17	17	14	2100	17210	16960	21.5	77.19	-0.19	2
Q14451	PF00017	SH2	82	9674	6.06	11	9	1357	8480	8480	61.6	93.78	-0.399	4	2.75	Q03135	PF01146	Caveolin	134	15521	5.64	15	11	2198	31065	30940	23.41	110.52	0.383	9
Q14451	PF00788	RA	87	9621.83	5.81	13	9	1330	12615	12490	38.1	82.87	-0.175	4	23.66	P06213	PF01030	Recep_L_domain	113	13348.8	7.98	12	13	1915	13075	12950	36.01	124.16	0.303	2
Q14451	PF00788	RA	87	9621.83	5.81	13	9	1330	12615	12490	38.1	82.87	-0.175	4	3.66	P06213	PF07714	Pkinase Tyr	268	30260.9	5.82	34	30	4237	34170	33920	36.38	83.99	-0.208	2
Q14451	PF00169	PH	108	12647.6	10.03	8	20	1776	18700	18450	54.1	65.83	-0.554	4	2.87	P06213	PF00757	Furin-like	162	18083.6	7.77	13	15	2413	20075	18450	56.85	45.68	-0.491	2
Q14451	PF00169	PH	108	12647.6	10.03	8	20	1776	18700	18450	54.1	65.83	-0.554	4	3.29	P06213	PF01030	Recep_L_domain	113	13348.8	7.98	12	13	1915	13075	12950	36.01	124.16	0.303	2
Q14451	PF00017	SH2	82	9674	6.06	11	9	1357	8480	8480	61.6	93.78	-0.399	4	3.41	P06213	PF00757	Furin-like	162	18083.6	7.77	13	15	2413	20075	18450	56.85	45.68	-0.491	2
Q14451	PF00017	SH2	82	9674	6.06	11	9	1357	8480	8480	61.6	93.78	-0.399	4	4.21	P06213	PF01030	Recep_L_domain	113	13348.8	7.98	12	13	1915	13075	12950	36.01	124.16	0.303	2
Q14451	PF00169	PH	108	12647.6	10.03	8	20	1776	18700	18450	54.1	65.83	-0.554	4	1.63	P06213	PF07714	Pkinase Tyr	268	30260.9	5.82	34	30	4237	34170	33920	36.38	83.99	-0.208	2
Q14451	PF00017	SH2	82	9674	6.06	11	9	1357	8480	8480	61.6	93.78	-0.399	4	2.39	P06213	PF07714	Pkinase Tyr	268	30260.9	5.82	34	30	4237	34170	33920	36.38	83.99	-0.208	2
Q14451	PF00788	RA	87	9621.83	5.81	13	9	1330	12615	12490	38.1	82.87	-0.175	4	3.66	Q05397	PF07714	Pkinase_Tyr	255	29112.9	8.73	26	31	4095	42900	42400	57.74	88.31	-0.132	2
Q14451	PF00169	PH	108	12647.6	10.03	8	20	1776	18700	18450	54.1	65.83	-0.554	4	1.63	Q05397	PF07714	Pkinase_Tyr	255	29112.9	8.73	26	31	4095	42900	42400	57.74	88.31	-0.132	2
Q14451	PF00017	SH2	82	9674	6.06	11	9	1357	8480	8480	61.6	93.78	-0.399	4	2.39	Q05397	PF07714	Pkinase_Tyr	255	29112.9	8.73	26	31	4095	42900	42400	57.74	88.31	-0.132	2
Q14451	PF00017	SH2	82	9674	6.06	11	9	1357	8480	8480	61.6	93.78	-0.399	4	2.84	Q06124	PF00102	Y_phosphatase	252	29018.1	7.8	32	33	4054	37150	36900	35.25	78.77	-0.515	4
Q14451	PF00017	SH2	82	9674	6.06	11	9	1357	8480	8480	61.6	93.78	-0.399	4	1.73	P62993	PF00018	SH3 1	47	5438.11	4.85	10	8	760	8480	8480	23.19	72.77	-0.8	2
Q14451	PF00017	SH2	82	9674	6.06	11	9	1357	8480	8480	61.6	93.78	-0.399	4	4.34	P29353	PF00640	PID	157	17268.9	9	13	18	2425	7825	7450	53.52	87.64	-0.078	4
Q9UNA1	PF00620	RhoGAP	155	17636.6	9.43	14	19	2514	10095	9970	38.31	101.87	-0.195	2	2.69	Q05397	PF07714	Pkinase_Tyr	255	29112.9	8.73	26	31	4095	42900	42400	57.74	88.31	-0.132	2
Q9UNA1	PF00169	PH	101	11813.4	6.15	17	16	1626	18575	18450	72.44	53.96	-0.788	4	1.63	Q05397	PF07714	Pkinase_Tyr	255	29112.9	8.73	26	31	4095	42900	42400	57.74	88.31	-0.132	2
Q9UNA1	PF00018	SH3 1	50	5436.95	4.37	8	2	745	8480	8480	44.86	72.2	-0.406	4	1.56	Q05397	PF07714	Pkinase_Tyr	255	29112.9	8.73	26	31	4095	42900	42400	57.74	88.31	-0.132	2
Q9UNA1	PF00620	RhoGAP	155	17636.6	9.43	14	19	2514	10095	9970	38.31	101.87	-0.195	2	2.69	Q14289	PF07714	Pkinase_Tyr	255	29581.5	5.82	35	31	4171	51380	50880	52.15	96.24	-0.081	2
Q9UNA1	PF00169	PH	101	11813.4	6.15	17	16	1626	18575	18450	72.44	53.96	-0.788	4	1.63	Q14289	PF07714	Pkinase_Tyr	255	29581.5	5.82	35	31	4171	51380	50880	52.15	96.24	-0.081	2
Q9UNA1	PF00018	SH3 1	50	5436.95	4.37	8	2	745	8480	8480	44.86	72.2	-0.406	4	1.56	Q14289	PF07714	Pkinase_Tyr	255	29581.5	5.82	35	31	4171	51380	50880	52.15	96.24	-0.081	2
Q9UNA1	PF00620	RhoGAP	155	17636.6	9.43	14	19	2514	10095	9970	38.31	101.87	-0.195	2	1.73	P06213	PF00757	Furin-like	162	18083.6	7.77	13	15	2413	20075	18450	56.85	45.68	-0.491	2
Q9UNA1	PF00620	RhoGAP	155	17636.6	9.43	14	19	2514	10095	9970	38.31	101.87	-0.195	2	2.23	P06213	PF01030	Recep_L_domain	113	13348.8	7.98	12	13	1915	13075	12950	36.01	124.16	0.303	2
Q9UNA1	PF00169	PH	101	11813.4	6.15	17	16	1626	18575	18450	72.44	53.96	-0.788	4	2.87	P06213	PF00757	Furin-like	162	18083.6	7.77	13	15	2413	20075	18450	56.85	45.68	-0.491	2
Q9UNA1	PF00169	PH	101	11813.4	6.15	17	16	1626	18575	18450	72.44	53.96	-0.788	4	3.29	P06213	PF01030	Recep_L_domain	113	13348.8	7.98	12	13	1915	13075	12950	36.01	124.16	0.303	2
Q9UNA1	PF00620	RhoGAP	155	17636.6	9.43	14	19	2514	10095	9970	38.31	101.87	-0.195	2	2.69	P06213	PF07714	Pkinase Tyr	268	30260.9	5.82	34	30	4237	34170	33920	36.38	83.99	-0.208	2
Q9UNA1	PF00169	PH	101	11813.4	6.15	17	16	1626	18575	18450	72.44	53.96	-0.788	4	1.63	P06213	PF07714	Pkinase Tyr	268	30260.9	5.82	34	30	4237	34170	33920	36.38	83.99	-0.208	2
Q9UNA1	PF00018	SH3 1	50	5436.95	4.37	8	2	745	8480	8480	44.86	72.2	-0.406	4	1.56	P06213	PF07714	Pkinase Tyr	268	30260.9	5.82	34	30	4237	34170	33920	36.38	83.99	-0.208	2
P17612	PF00069	Pkinase	255	29715.6	9.49	26	36	4227	39880	39880	31.81	92.86	-0.236	2	1.76	P41240	PF07714	Pkinase_Tyr	246	27472.8	7.75	31	32	3885	35660	35410	32.98	92.68	-0.14	4
P17612	PF00069	Pkinase	255	29715.6	9.49	26	36	4227	39880	39880	31.81	92.86	-0.236	2	1.76	P12931	PF07714	Pkinase Tyr	250	28537.2	7.01	31	31	4023	44265	43890	41.6	86.96	-0.204	4
P17612	PF00069	Pkinase	255	29715.6	9.49	26	36	4227	39880	39880	31.81	92.86	-0.236	2	6.86	Q13153	PF00786	PBD	59	6708.47	4.63	4	4	933	6990	0	51.85	77.63	-0.436	4
P17612	PF00069	Pkinase	255	29715.6	9.49	26	36	4227	39880	39880	31.81	92.86	-0.236	2	1.69	P19174	PF00168	C2	106	11892.7	6.12	12	11	1675	10095	9970	36.59	82.74	-0.049	4
Q12809	PF00027	cNMP_binding	86	9461.82	5.35	12	8	1340	5960	5960	37.78	113.37	0.026	2	2.64	P17612	PF00069	Pkinase	255	29715.6	9.49	26	36	4227	39880	39880	31.81	92.86	-0.236	2
P45983	PF00069	Pkinase	296	33913.7	8.65	31	36	4795	33850	33350	34.67	96.15	-0.122	4	1.77	P46108	PF07653	SH3_2	57	6453.43	9.36	6	9	918	8480	8480	29.38	90.53	-0.374	1
P45983	PF00069	Pkinase	296	33913.7	8.65	31	36	4795	33850	33350	34.67	96.15	-0.122	4	1.77	P46109	PF07653	SH3_2	56	6306.4	9.65	5	9	902	6990	6990	18.33	88.75	-0.096	1
P45983	PF00069	Pkinase	296	33913.7	8.65	31	36	4795	33850	33350	34.67	96.15	-0.122	4	2.05	P35568	PF02174	IRS	103	11591.5	8.01	10	11	1638	12615	12490	38.31	95.53	0.108	4
P45983	PF00069	Pkinase	296	33913.7	8.65	31	36	4795	33850	33350	34.67	96.15	-0.122	4	1.06	P35568	PF00169	PH	108	12525.1	9.55	14	20	1751	18450	18450	66.42	65.19	-0.872	4
P45983	PF00069	Pkinase	296	33913.7	8.65	31	36	4795	33850	33350	34.67	96.15	-0.122	4	1.94	P22681	PF00627	UBA	47	5272.97	4.59	5	3	742	2980	0	103.58	103.83	-0.151	4
P45983	PF00069	Pkinase	296	33913.7	8.65	31	36	4795	33850	33350	34.67	96.15	-0.122	4	4.86	P29353	PF00640	PID	157	17268.9	9	13	18	2425	7825	7450	53.52	87.64	-0.078	4
Q15654	PF00412	LIM	58	6176.04	6.04	6	5	836	4845	4470	27.93	75.52	0.333	4	150.91	P49023	PF00412	LIM	56	6445.28	6.44	7	6	869	8730	8480	41.37	41.79	-0.646	4
Q15654	PF00412	LIM	58	6176.04	6.04	6	5	836	4845	4470	27.93	75.52	0.333	4	150.91	P48059	PF00412	LIM	58	6853.74	4.93	9	5	918	4845	4470	23.22	42.07	-0.414	4
Q15654	PF00412	LIM	58	6176.04	6.04	6	5	836	4845	4470	27.93	75.52	0.333	4	1.86	P50552	PF08776	VASP_tetra	37	4573.31	6.45	9	9	666	1490	0	88.25	107.84	-0.949	9
Q15654	PF00412	LIM	58	6176.04	6.04	6	5	836	4845	4470	27.93	75.52	0.333	4	6.25	P50552	PF00568	WH1	110	12232.9	9.69	7	12	1693	21095	20970	40.92	66.55	-0.365	1
Q7L3E0	PF07679	I-set	91	10196.4	5.05	14	9	1407	8730	8480	27.95	72.86	-0.467	2	1.55	P50552	PF08776	VASP_tetra	37	4573.31	6.45	9	9	666	1490	0	88.25	107.84	-0.949	9
Q7L3E0	PF07679	I-set	91	10196.4	5.05	14	9	1407	8730	8480	27.95	72.86	-0.467	2	2.17	P12931	PF07714	Pkinase Tyr	250	28537.2	7.01	31	31	4023	44265	43890	41.6	86.96	-0.204	4
Q93052	PF00412	LIM	58	6428.42	5.61	6	5	871	4970	4470	25.94	65.52	0.031	1	1.86	P50552	PF00568	WH1	110	12232.9	9.69	7	12	1693	21095	20970	40.92	66.55	-0.365	1
Q93052	PF00412	LIM	58	6428.42	5.61	6	5	871	4970	4470	25.94	65.52	0.031	1	6.25	P50552	PF08776	VASP_tetra	37	4573.31	6.45	9	9	666	1490	0	88.25	107.84	-0.949	9
Q93052	PF00412	LIM	58	6428.42	5.61	6	5	871	4970	4470	25.94	65.52	0.031	1	150.91	Q8WUP2	PF00412	LIM	58	6774.8	8.8	5	9	923	4845	4470	66.74	45.52	-0.64	4
Q92882	PF00018	SH3 1	46	5371.96	4.51	8	5	742	15470	0	15.56	61.52	-0.713	4	2.83	P22681	PF00627	UBA	47	5272.97	4.59	5	3	742	2980	0	103.58	103.83	-0.151	4
Q92882	PF00018	SH3 1	46	5371.96	4.51	8	5	742	15470	0	15.56	61.52	-0.713	4	9.54	P22681	PF02262	Cbl_N	125	14848.5	9.46	15	22	2117	13075	12950	31.71	84.96	-0.525	4
Q92882	PF00018	SH3 1	46	5371.96	4.51	8	5	742	15470	0	15.56	61.52	-0.713	4	9.54	P22681	PF02761	Cbl_N2	84	9796.25	8.14	9	10	1378	23490	23490	23.32	84.88	-0.079	4
Q92882	PF00018	SH3 1	46	5371.96	4.51	8	5	742	15470	0	15.56	61.52	-0.713	4	9.54	P22681	PF02762	Cbl_N3	86	9890.32	8.85	7	9	1387	12950	12950	46.45	80.58	-0.307	4
Q9UGI8	PF06297	PET	85	9726.14	9.04	11	14	1368	11460	0	47.39	60.82	-1	2	44.83	P50552	PF08776	VASP_tetra	37	4573.31	6.45	9	9	666	1490	0	88.25	107.84	-0.949	9
Q9UGI8	PF00412	LIM	62	7338.48	5.83	9	7	988	20440	19940	53.45	59.84	-0.277	2	1.86	P50552	PF00568	WH1	110	12232.9	9.69	7	12	1693	21095	20970	40.92	66.55	-0.365	1
Q9UGI8	PF00412	LIM	62	7338.48	5.83	9	7	988	20440	19940	53.45	59.84	-0.277	2	6.25	P50552	PF08776	VASP_tetra	37	4573.31	6.45	9	9	666	1490	0	88.25	107.84	-0.949	9
Q9UGI8	PF00412	LIM	62	7338.48	5.83	9	7	988	20440	19940	53.45	59.84	-0.277	2	150.91	Q15942	PF00412	LIM	58	6433.33	6.96	3	3	870	4845	4470	59.27	64.14	-0.15	1
Q14511	PF00018	SH3 9	51	5651.99	3.35	12	1	755	11460	0	27.67	64.9	-0.516	2	18.95	P49023	PF00412	LIM	56	6445.28	6.44	7	6	869	8730	8480	41.37	41.79	-0.646	4
