# Supplementary material for: Prediction of Protein-Protein Interactions Based on Domain
Source: Comput Math Methods Med. 2019 Aug 21;2019:5238406. doi: 10.1155/2019/5238406 (PMC6720845; doi:10.1155/2019/5238406)
Supplement: Supplementary Materials — Supplementary Table S1: 1040 positive DDI. Supplementary Table S2: 1040 negative DDI. [file 5238406.f1.zip › 5238406.f1/Supplementary Table S2.xlsx]

## Sheet: Sheet1
protein	domain siss-prot number	domain	Number of amino acids	Molecular weight （unused)	Theoretical PI	Asp+Glu	Arg+Lys	total number of atoms	Ext. coefficient	Ext. coefficient2（unused)	Instability index	Aliphatic index	Grand average of hydropathicity	location	SCORE	protein	domain number	domain	Number of amino acids	Molecular weight （unused)	Theoretical PI	Asp+Glu	Arg+Lys	total number of atoms	Ext. coefficient	Ext. coefficient2（unused)	Instability index	Aliphatic index	Grand average of hydropathicity	location
Q16533.1	PF09808	SNAPc_SNAP43	185	22293.9	9.07	24	29	3138	28545	28420	27.29	81.73	-0.427	1	1.74	P06132.2	PF01208	URO-D	347	38590.1	5.77	41	34	5429	44265	43890	48.53	90	-0.096	4
Q9UBU7.1	PF07535	zf-DBF	44	5232.89	6.06	7	6	723	4595	4470	36.06	75.23	-0.877	1	1.74	P07741.2	PF00156	Pribosyltran	149	15956.6	6.93	17	17	2293	10095	9970	33.37	113.29	0.191	4
Q5XKR4	PF00046	Homeodomain	57	7072.18	11.24	6	14	1005	12490	0	65.2	65.09	-1.04	4	1.74	Q92844.2	PF12845	TBD	65	7354.42	6.74	9	9	1032	5625	5500	54.93	76.62	-0.594	4
Q5XKR4	PF03826	OAR	19	2108.54	11.71	1	4	316	5500	0	32.88	102.63	-0.226	1	1.74	Q92844.2	PF12845	TBD	65	7354.42	6.74	9	9	1032	5625	5500	54.93	76.62	-0.594	4
Q07864.5	PF03104	D+R8:Y10NA_pol_B_exo1	342	39715.1	5.46	56	44	5561	44600	44350	42.5	82.05	-0.487	1	1.74	Q16851.5	PF01704	UDPGP	419	47004.9	8.8	46	51	6669	37485	37360	32.73	93.44	-0.279	4
Q07864.5	PF00136	DNA_pol_B	528	60806	8.83	69	78	8564	80385	79760	46.37	81.5	-0.389	1	1.74	Q16851.5	PF01704	UDPGP	419	47004.9	8.8	46	51	6669	37485	37360	32.73	93.44	-0.279	4
Q07864.5	PF08490	DUF1744	389	44545.1	6.06	46	38	6236	58370	57870	58.03	93.52	-0.142	1	1.74	Q16851.5	PF01704	UDPGP	419	47004.9	8.8	46	51	6669	37485	37360	32.73	93.44	-0.279	4
Q9UNI6.1	PF00782	DSPc	135	14912.2	5.33	19	14	2108	15595	15470	35.54	95.48	0.011	1	1.74	Q07617.3	PF00515	TPR_1	34	3853.37	4.44	5	3	526	3230	2980	25.84	83.53	-0.271	4
Q9UNI6.1	PF00782	DSPc	135	14912.2	5.33	19	14	2108	15595	15470	35.54	95.48	0.011	1	1.74	Q07617.3	PF13877	RPAP3_C	93	10578.5	9.3	9	13	1525	4470	4470	26.31	107.1	-0.173	4
O95766	PF08217	DUF1712 PF08217	401	46911.9	6.05	55	49	6572	35215	34840	47.45	81.65	-0.396	8	1.74	Q12882	PF14691	Fer4_20	114	12291.1	5.26	12	10	1700	4970	4470	35.52	77.98	-0.04	4
O95766	PF08217	DUF1712 PF08217	401	46911.9	6.05	55	49	6572	35215	34840	47.45	81.65	-0.396	8	1.74	Q12882	PF07992	Pyr_redox_2	312	33903.1	5.49	39	35	4794	24325	23950	37.35	89.68	0.032	4
O95766	PF08217	DUF1712 PF08217	401	46911.9	6.05	55	49	6572	35215	34840	47.45	81.65	-0.396	8	1.74	Q12882	PF01180	DHO_dh	307	32446.1	6.21	27	26	4563	35325	34950	37.03	89.06	0.103	4
O95766	PF08217	DUF1712 PF08217	401	46911.9	6.05	55	49	6572	35215	34840	47.45	81.65	-0.396	8	1.74	Q12882	PF14697	Fer4_21 PF14697	59	6488.57	4.02	8	2	872	3480	2980	42.93	72.71	0.258	4
P09884.2	PF12254	DNA_pol_alpha_N	62	7338.93	4.18	20	9	1008	12950	0	20.62	70.65	-1.084	1	1.74	P09132	PF01922	SRP19	99	11380.2	9.44	10	16	1614	13075	12950	45.78	88.59	-0.384	4
P09884.2	PF03104	DNA_pol_B_exo1	343	38955.7	8.91	40	49	5525	30535	29910	36.31	85.51	-0.229	1	1.74	P09132	PF01922	SRP19	99	11380.2	9.44	10	16	1614	13075	12950	45.78	88.59	-0.384	4
P09884.2	PF00136	DNA_pol_B	454	51799.5	7.68	61	62	7356	41050	40800	48.21	95.09	-0.437	1	1.74	P09132	PF01922	SRP19	99	11380.2	9.44	10	16	1614	13075	12950	45.78	88.59	-0.384	4
P09884.2	PF08996	zf-DNA_Pol	191	22399.7	8.23	26	29	3110	22640	21890	50.97	64.87	-0.631	1	1.74	P09132	PF01922	SRP19	99	11380.2	9.44	10	16	1614	13075	12950	45.78	88.59	-0.384	4
P13984.2	PF17683	TFIIF_beta_N	93	10051.4	9.16	9	11	1426	12490	0	38.75	84.84	-0.349	1	1.74	Q9UD71.2	PF05395	DARPP-32	180	20444.1	4.57	45	23	2797	8605	8480	87.74	52.61	-1.42	1
P13984.2	PF02270	TFIIF_beta	65	7771.02	8.94	9	11	1112	11460	0	19.16	97.38	-0.605	1	1.74	Q9UD71.2	PF05395	DARPP-32	180	20444.1	4.57	45	23	2797	8605	8480	87.74	52.61	-1.42	1
Q5H9F3	PF15808	BCOR	247	28656.8	9.04	42	48	3970	24200	23950	85.49	50.97	-1.366	1	1.74	Q06278	PF00111	Fer2	71	7908.44	9.77	3	12	1124	6210	5960	55.16	86.48	-0.154	4
Q5H9F3	PF15808	BCOR	247	28656.8	9.04	42	48	3970	24200	23950	85.49	50.97	-1.366	1	1.74	Q06278	PF01799	Fer2_2	75	8198.47	7.59	6	7	1136	3355	2980	40.5	78	-0.185	4
Q5H9F3	PF15808	BCOR	247	28656.8	9.04	42	48	3970	24200	23950	85.49	50.97	-1.366	1	1.74	Q06278	PF00941	FAD_binding_5	185	20397.8	7.94	17	18	2913	11585	11460	41.34	104.81	-0.011	4
Q5H9F3	PF15808	BCOR	247	28656.8	9.04	42	48	3970	24200	23950	85.49	50.97	-1.366	1	1.74	Q06278	PF03450	CO_deh_flav_C	105	11625.6	8.82	9	12	1648	8730	8480	30.65	102.19	0.2	4
Q5H9F3	PF15808	BCOR	247	28656.8	9.04	42	48	3970	24200	23950	85.49	50.97	-1.366	1	1.74	Q06278	PF01315	Ald_Xan_dh_C	108	11895.7	4.52	17	9	1670	3230	2980	26.52	100.19	0.316	4
Q5H9F3	PF15808	BCOR	247	28656.8	9.04	42	48	3970	24200	23950	85.49	50.97	-1.366	1	1.74	Q06278	PF02738	Ald_Xan_dh_C2	539	59630.5	6.27	62	57	8336	63550	62800	43.03	83.41	-0.19	4
Q5H9F3	PF12796	Ank_2	95	10435.5	4.65	15	6	1436	15595	15470	41.29	92.42	-0.302	1	1.74	Q06278	PF00111	Fer2	71	7908.44	9.77	3	12	1124	6210	5960	55.16	86.48	-0.154	4
Q5H9F3	PF12796	Ank_2	95	10435.5	4.65	15	6	1436	15595	15470	41.29	92.42	-0.302	1	1.74	Q06278	PF01799	Fer2_2	75	8198.47	7.59	6	7	1136	3355	2980	40.5	78	-0.185	4
Q5H9F3	PF12796	Ank_2	95	10435.5	4.65	15	6	1436	15595	15470	41.29	92.42	-0.302	1	1.74	Q06278	PF00941	FAD_binding_5	185	20397.8	7.94	17	18	2913	11585	11460	41.34	104.81	-0.011	4
Q5H9F3	PF12796	Ank_2	95	10435.5	4.65	15	6	1436	15595	15470	41.29	92.42	-0.302	1	1.74	Q06278	PF03450	CO_deh_flav_C	105	11625.6	8.82	9	12	1648	8730	8480	30.65	102.19	0.2	4
Q5H9F3	PF12796	Ank_2	95	10435.5	4.65	15	6	1436	15595	15470	41.29	92.42	-0.302	1	1.74	Q06278	PF01315	Ald_Xan_dh_C	108	11895.7	4.52	17	9	1670	3230	2980	26.52	100.19	0.316	4
Q5H9F3	PF12796	Ank_2	95	10435.5	4.65	15	6	1436	15595	15470	41.29	92.42	-0.302	1	1.74	Q06278	PF02738	Ald_Xan_dh_C2	539	59630.5	6.27	62	57	8336	63550	62800	43.03	83.41	-0.19	4
Q6ZYL4.1	PF06331	Tfb5	69	7797.09	4.33	11	5	1110	1490	1490	35.42	124.2	0.345	1	1.74	P27708.3	PF00988	CPSase_sm_chain	138	14897.1	5.06	15	9	2092	22585	22460	28.21	92.54	0.025	5
Q6ZYL4.1	PF06331	Tfb5	69	7797.09	4.33	11	5	1110	1490	1490	35.42	124.2	0.345	1	1.74	P27708.3	PF00117	GATase	178	19461.9	5.2	18	10	2691	18825	18450	27.65	83.82	-0.126	4
Q6ZYL4.1	PF06331	Tfb5	69	7797.09	4.33	11	5	1110	1490	1490	35.42	124.2	0.345	1	1.74	P27708.3	PF02786	CPSase_L_D2	205	22058	5.27	23	17	3108	19035	18910	35.64	100.05	-0.001	4
Q6ZYL4.1	PF06331	Tfb5	69	7797.09	4.33	11	5	1110	1490	1490	35.42	124.2	0.345	1	1.74	P27708.3	PF02787	CPSase_L_D3	122	14048.4	8.62	13	15	2007	24075	23950	35.24	108.03	-0.082	5
Q6ZYL4.1	PF06331	Tfb5	69	7797.09	4.33	11	5	1110	1490	1490	35.42	124.2	0.345	1	1.74	P27708.3	PF02142	MGS	102	11389	5.65	13	11	1612	11460	11460	38.8	99.41	-0.023	4
Q6ZYL4.1	PF06331	Tfb5	69	7797.09	4.33	11	5	1110	1490	1490	35.42	124.2	0.345	1	1.74	P27708.3	PF01979	Amidohydro_1	284	30722.4	5.95	33	24	4333	18365	17990	44.44	98.66	0	4
Q6ZYL4.1	PF06331	Tfb5	69	7797.09	4.33	11	5	1110	1490	1490	35.42	124.2	0.345	1	1.74	P27708.3	PF02729	OTCace_N	142	15506.8	8.03	13	14	2175	3105	2980	46.01	85.85	-0.024	4
Q6ZYL4.1	PF06331	Tfb5	69	7797.09	4.33	11	5	1110	1490	1490	35.42	124.2	0.345	1	1.74	P27708.3	PF00185	OTCace	151	17215	8.98	16	19	2420	9065	8940	51.14	79.4	-0.21	4
Q9UBX1.1	PF08246	Inhibitor_I29	58	6926.78	8.3	8	9	967	9970	0	36.81	65.52	-0.648	8	1.74	O75936.1	PF06155	DUF971	84	9866.23	4.58	16	9	1373	29575	29450	39.05	96.43	-0.293	4
Q9UBX1.1	PF08246	Inhibitor_I29	58	6926.78	8.3	8	9	967	9970	0	36.81	65.52	-0.648	8	1.74	O75936.1	PF02668	TauD	260	29807.8	6	34	29	4162	38640	38390	31.18	79.04	-0.386	4
Q9UBX1.1	PF00112	Peptidase_C1	212	23378.4	6.1	21	19	3215	63285	62910	38.79	70.9	-0.32	8	1.74	O75936.1	PF06155	DUF971	84	9866.23	4.58	16	9	1373	29575	29450	39.05	96.43	-0.293	4
Q9UBX1.1	PF00112	Peptidase_C1	212	23378.4	6.1	21	19	3215	63285	62910	38.79	70.9	-0.32	8	1.74	O75936.1	PF02668	TauD	260	29807.8	6	34	29	4162	38640	38390	31.18	79.04	-0.386	4
O00623.1	PF04757	Pex2_Pex12	242	27798.4	9.85	17	28	3959	57410	0	56.68	99.13	-0.043	7	1.74	P56589.1	PF04882	Peroxin-3	95	11056	10.08	7	17	1580	6085	5960	40.89	89.37	-0.537	7
P78364.3	PF16616	PHC2_SAM_assoc	108	11928.2	10.2	11	19	1651	3105	2980	67.65	49.72	-1.129	1	1.74	Q9UI17	PF01266	DAO	364	40324.5	6.5	40	37	5692	63955	63830	30.78	91.04	-0.159	5
P78364.3	PF16616	PHC2_SAM_assoc	108	11928.2	10.2	11	19	1651	3105	2980	67.65	49.72	-1.129	1	1.74	Q9UI17	PF16350	FAO_M	55	6432.09	6.79	8	8	888	11460	0	34.94	44.36	-1.173	5
P78364.3	PF16616	PHC2_SAM_assoc	108	11928.2	10.2	11	19	1651	3105	2980	67.65	49.72	-1.129	1	1.74	Q9UI17	PF01571	GCV_T	272	30923	5.57	36	29	4320	49515	49390	44.9	81.36	-0.38	5
P78364.3	PF16616	PHC2_SAM_assoc	108	11928.2	10.2	11	19	1651	3105	2980	67.65	49.72	-1.129	1	1.74	Q9UI17	PF08669	GCV_T_C	79	8661.78	4.44	9	5	1223	12950	12950	29.47	104.68	-0.015	5
P78364.3	PF00536	SAM_1	65	7363.59	5	10	7	1048	7115	6990	65.96	112.62	0.035	1	1.74	Q9UI17	PF01266	DAO	364	40324.5	6.5	40	37	5692	63955	63830	30.78	91.04	-0.159	5
P78364.3	PF00536	SAM_1	65	7363.59	5	10	7	1048	7115	6990	65.96	112.62	0.035	1	1.74	Q9UI17	PF16350	FAO_M	55	6432.09	6.79	8	8	888	11460	0	34.94	44.36	-1.173	5
P78364.3	PF00536	SAM_1	65	7363.59	5	10	7	1048	7115	6990	65.96	112.62	0.035	1	1.74	Q9UI17	PF01571	GCV_T	272	30923	5.57	36	29	4320	49515	49390	44.9	81.36	-0.38	5
P78364.3	PF00536	SAM_1	65	7363.59	5	10	7	1048	7115	6990	65.96	112.62	0.035	1	1.74	Q9UI17	PF08669	GCV_T_C	79	8661.78	4.44	9	5	1223	12950	12950	29.47	104.68	-0.015	5
O43543.1	PF08423	Rad51	243	27864	6.07	29	24	3890	25035	24410	48.09	91.81	-0.091	1	1.74	P26639.3	PF02789	Peptidase_M17_N	133	14391.2	4.93	22	16	2023	11585	11460	30.19	85.86	-0.444	4
O43543.1	PF08423	Rad51	243	27864	6.07	29	24	3890	25035	24410	48.09	91.81	-0.091	1	1.74	P26639.3	PF00883	Peptidase_M17	312	33706.8	8.25	31	33	4744	35200	34950	37.06	85.45	-0.103	4
O95926	PF08231	SYF2	149	17960	8.06	31	32	2508	18910	0	50.45	59.66	-1.385	1	1.74	Q9BXI3	PF06189	5-nucleotidase	273	30493.7	6.23	35	31	4283	19035	18910	41.16	87.25	-0.212	4
Q02363.1	PF00010	HLH	42	4978.9	6.75	5	5	715	4470	4470	59.45	122.86	-0.171	1	1.74	P49753	PF04775	Bile_Hydr_Trans	126	14087.2	6.36	20	19	2011	8480	8480	36.47	99.84	-0.36	5
Q02363.1	PF00010	HLH	42	4978.9	6.75	5	5	715	4470	4470	59.45	122.86	-0.171	1	1.74	P49753	PF08840	BAAT_C	210	23120.5	6.86	21	20	3247	28670	28420	42.64	87.76	-0.175	4
P62875.1	PF01194	RNA_pol_N	59	6716.03	7.66	7	8	956	10220	9970	31.32	115.76	0.273	1	1.74	P0C7P0	PF09360	zf-CDGSH	39	4396.22	9.82	2	8	625	7115	6990	50.22	72.31	-0.187	5
P50897	PF02089	Palm_thioest	256	28652.9	6.36	28	26	4011	28795	28420	30.93	84.88	-0.234	8	1.74	P82933.2	PF00380	Ribosomal_S9	123	13983.1	10.17	13	25	1977	15595	15470	27.36	65.85	-0.655	5
P17480.1	PF00505	HMG_box	69	8656.27	10.09	9	20	1245	5960	0	45.46	55.22	-1.254	1	1.74	O00471.1	PF07393	Sec10	619	71476.1	6.61	82	78	10061	35270	34270	36.82	92.92	-0.332	4
P17480.1	PF09011	HMG_box_2	67	7924.2	9.06	9	13	1110	11585	11460	45.17	58.21	-1.007	1	1.74	O00471.1	PF07393	Sec10	619	71476.1	6.61	82	78	10061	35270	34270	36.82	92.92	-0.332	4
P17480.1	PF14887	HMG_box_5	85	10076.7	9.77	13	20	1424	19480	0	47.19	54.12	-1.122	1	1.74	O00471.1	PF07393	Sec10	619	71476.1	6.61	82	78	10061	35270	34270	36.82	92.92	-0.332	4
Q8WYA6.1	PF08216	CTNNBL	106	12310	4.42	25	11	1735	2980	0	78.01	105.66	-0.448	1	1.74	Q9UBR1	PF00795	CN_hydrolase	280	30946.1	6.43	27	24	4296	38430	37930	40.57	81.54	-0.164	4
Q2M1K9.1	PF00096	zf-C2H2	23	2912.38	8.82	2	4	404	3105	2980	42.37	67.83	-0.687	1	1.74	Q8N4X5.1	PF00169	PH	103	11965.1	9.68	11	19	1717	23615	23490	41.29	103.11	-0.418	4
Q2M1K9.1	PF13912	zf-C2H2_6	27	3195.68	7.84	2	3	442	1615	1490	37.42	82.96	-0.667	1	1.74	Q8N4X5.1	PF00169	PH	103	11965.1	9.68	11	19	1717	23615	23490	41.29	103.11	-0.418	4
P07686.3	PF14845	Glycohydro_20b2	123	13978	6.2	11	9	1964	24075	23950	69.27	90.41	-0.123	8	1.74	P63302	PF10262	Rdx	75	8308.57	9.15	9	13	1176	6085	5960	9.1	80.53	-0.24	4
P07686.3	PF00728	Glyco_hydro_20	318	36622.8	6.73	37	36	5148	75985	75860	38.35	82.74	-0.307	8	1.74	P63302	PF10262	Rdx	75	8308.57	9.15	9	13	1176	6085	5960	9.1	80.53	-0.24	4
O43513.1	PF05983	Med7	158	18832	6.72	24	23	2680	5960	5960	50.76	97.47	-0.534	1	1.74	P82933.2	PF00380	Ribosomal_S9	123	13983.1	10.17	13	25	1977	15595	15470	27.36	65.85	-0.655	5
P06746.3	PF14716	HHH_8	67	7289.42	9.48	7	11	1045	4470	0	12.65	86.12	-0.376	4	1.74	P28838	PF00380	Ribosomal_S9	123	13983.1	10.17	13	25	1977	15595	15470	27.36	65.85	-0.655	5
P06746.3	PF10391	DNA_pol_lambd_f	50	5761.5	8.35	8	9	813	1490	0	7.5	78	-0.762	1	1.74	P28838	PF00380	Ribosomal_S9	123	13983.1	10.17	13	25	1977	15595	15470	27.36	65.85	-0.655	5
P06746.3	PF14792	DNA_pol_B_palm	114	13127.1	7.09	17	17	1855	3105	2980	38.9	82.81	-0.578	1	1.74	P28838	PF00380	Ribosomal_S9	123	13983.1	10.17	13	25	1977	15595	15470	27.36	65.85	-0.655	5
P06746.3	PF14791	DNA_pol_B_thumb	67	7695.69	5.72	10	9	1078	11460	0	26.16	74.18	-0.549	4	1.74	P28838	PF00380	Ribosomal_S9	123	13983.1	10.17	13	25	1977	15595	15470	27.36	65.85	-0.655	5
P06746.3	PF14716	HHH_8	67	7289.42	9.48	7	11	1045	4470	0	12.65	86.12	-0.376	4	1.74	P28838	PF00883	Peptidase_M17	312	33706.8	8.25	31	33	4744	35200	34950	37.06	85.45	-0.103	4
P06746.3	PF10391	DNA_pol_lambd_f	50	5761.5	8.35	8	9	813	1490	0	7.5	78	-0.762	1	1.74	P28838	PF00883	Peptidase_M17	312	33706.8	8.25	31	33	4744	35200	34950	37.06	85.45	-0.103	4
P06746.3	PF14792	DNA_pol_B_palm	114	13127.1	7.09	17	17	1855	3105	2980	38.9	82.81	-0.578	1	1.74	P28838	PF00883	Peptidase_M17	312	33706.8	8.25	31	33	4744	35200	34950	37.06	85.45	-0.103	4
P06746.3	PF14791	DNA_pol_B_thumb	67	7695.69	5.72	10	9	1078	11460	0	26.16	74.18	-0.549	4	1.74	P28838	PF00883	Peptidase_M17	312	33706.8	8.25	31	33	4744	35200	34950	37.06	85.45	-0.103	4
Q15393.4	PF10433	MMS1_N	517	57633.4	4.71	78	46	8049	36955	36330	39.98	88.96	-0.146	1	1.74	O75880	PF02630	SCO1-SenC	137	15595.5	4.35	27	12	2174	17545	17420	26.02	84.6	-0.363	5
Q15393.4	PF03178	CPSF_A	322	35996	5.82	38	31	5066	40130	39880	32.03	96.77	-0.137	1	1.74	O75880	PF02630	SCO1-SenC	137	15595.5	4.35	27	12	2174	17545	17420	26.02	84.6	-0.363	5
O75446.1	PF13866	zf-SAP30	72	8218.41	9.97	8	18	1157	3230	2980	54.5	67.78	-1.067	1	1.74	Q9BPZ3.1	PF07145	PAM2	18	1940.27	9.7	1	3	283	0	0	15.34	91.67	-0.272	4
O75446.1	PF13867	SAP30_Sin3_bdg	53	6289.4	10.22	3	10	907	4470	4470	53.71	95.47	-0.383	1	1.74	Q9BPZ3.1	PF07145	PAM2	18	1940.27	9.7	1	3	283	0	0	15.34	91.67	-0.272	4
O43365.1	PF00046	Homeodomain	57	7174.43	10.72	5	15	1023	9970	9970	39.01	71.93	-0.988	1	1.74	Q92598.1	PF00012	HSP70	706	79255.2	5.32	107	88	11128	41215	40340	41.52	81.18	-0.419	4
O43365.1	PF13293	DUF4074	65	6551.15	6.44	4	2	892	2980	0	21.01	51.23	-0.686	1	1.74	Q92598.1	PF00012	HSP70	706	79255.2	5.32	107	88	11128	41215	40340	41.52	81.18	-0.419	4
P06280.1	PF16499	Melibiase_2	284	32669.9	4.65	39	23	4466	90005	89380	40.88	72.18	-0.374	8	1.74	Q92598.1	PF00012	HSP70	706	79255.2	5.32	107	88	11128	41215	40340	41.52	81.18	-0.419	4
P06280.1	PF17450	Melibiase_2_C	87	9677.15	9.92	5	11	1365	21095	20970	53.79	82.99	-0.263	5	1.74	Q92598.1	PF00012	HSP70	706	79255.2	5.32	107	88	11128	41215	40340	41.52	81.18	-0.419	4
Q7Z5Q5	PF18049	DNA_pol_P_Exo	219	24485	5.53	27	22	3420	29950	29450	31.23	89.45	-0.138	1	1.74	Q99819.2	PF02115	Rho_GDI	188	21120.3	5.75	27	23	2997	23045	22920	25.16	100.43	-0.198	4
Q7Z5Q5	PF00476	DNA_pol_A	408	45637.8	9.32	42	53	6507	24325	23950	36.72	97.08	-0.215	1	1.74	Q99819.2	PF02115	Rho_GDI	188	21120.3	5.75	27	23	2997	23045	22920	25.16	100.43	-0.198	4
Q9Y6W3	PF04212	MIT	62	7164.98	5.22	10	7	997	7450	0	38.61	85.16	-0.469	1	1.74	P50135	PF13489	Methyltransf_23	190	21734.1	6.13	25	23	3064	34170	33920	36.07	89.79	-0.324	4
Q9Y6W3	PF00648	Peptidase_C2	297	34439.4	8.63	33	37	4814	77600	77350	37.15	77.78	-0.459	1	1.74	P50135	PF13489	Methyltransf_23	190	21734.1	6.13	25	23	3064	34170	33920	36.07	89.79	-0.324	4
Q9Y6W3	PF01067	Calpain_III	110	12186.7	6.31	10	9	1690	11585	11460	45.16	68.18	-0.345	1	1.74	P50135	PF13489	Methyltransf_23	190	21734.1	6.13	25	23	3064	34170	33920	36.07	89.79	-0.324	4
Q9H8M7.1	PF13898	DUF4205	296	32812.4	5.04	39	25	4579	44055	43430	54.79	89.29	-0.023	1	1.74	Q14749.3	PF13649	Methyltransf_25	111	12197.8	4.92	18	12	1690	18115	17990	59.07	81.71	-0.216	4
Q9UJC5	PF04908	SH3BGR	98	11376	5.45	14	13	1591	9970	9970	58.08	66.5	-0.519	1	1.74	Q96Q11	PF01743	PolyA_pol	124	14184.9	5.6	20	17	1977	8480	0	22.57	71.61	-0.62	5
Q9UJC5	PF04908	SH3BGR	98	11376	5.45	14	13	1591	9970	9970	58.08	66.5	-0.519	1	1.74	Q96Q11	PF12627	PolyA_pol_RNAbd	58	6352.3	5.33	8	4	909	8480	0	20.77	131.21	0.116	5
O75528.1	PF10198	Ada3	120	14141.2	9.66	24	30	2022	5500	0	53.91	78.17	-1.201	1	1.74	Q9H2W6	PF11788	MRP-L46	109	12811.5	4.85	23	16	1811	12490	12490	60.53	98.53	-0.769	5
Q12857	PF10524	NfI_DNAbd_pre-N	39	4892.65	9.87	4	8	691	8480	0	39.99	57.69	-0.869	1	1.74	Q16698	PF13561	adh_short_C2	240	25212	8.3	21	23	3565	21220	20970	21.14	88.67	0.049	5
Q12857	PF03165	MH1	95	10926	9.67	11	20	1566	12740	12490	28.27	90.21	-0.474	1	1.74	Q16698	PF13561	adh_short_C2	240	25212	8.3	21	23	3565	21220	20970	21.14	88.67	0.049	5
Q12857	PF00859	CTF_NFI	295	31267.7	7.27	19	19	4324	21430	21430	74.32	48.88	-0.602	1	1.74	Q16698	PF13561	adh_short_C2	240	25212	8.3	21	23	3565	21220	20970	21.14	88.67	0.049	5
O00267.1	PF11942	Spt5_N	98	11410.1	3.86	32	9	1549	18450	0	67.44	75.61	-1.109	1	1.74	P40925.4	PF00056	Ldh_1_N	149	15933.8	8.54	16	18	2300	4595	4470	17.82	114.5	0.25	4
O00267.1	PF03439	Spt5-NGN	87	10028.7	9.1	8	11	1429	18450	18450	24.76	95.17	-0.17	1	1.74	P40925.4	PF00056	Ldh_1_N	149	15933.8	8.54	16	18	2300	4595	4470	17.82	114.5	0.25	4
O00267.1	PF00467	KOW	32	3564.07	4.58	6	3	503	0	0	7.64	109.38	0.328	1	1.74	P40925.4	PF00056	Ldh_1_N	149	15933.8	8.54	16	18	2300	4595	4470	17.82	114.5	0.25	4
O00267.1	PF11942	Spt5_N	98	11410.1	3.86	32	9	1549	18450	0	67.44	75.61	-1.109	1	1.74	P40925.4	PF02866	Ldh_1_C	176	19604.3	6.4	24	23	2765	27960	27960	20.94	85.28	-0.308	4
O00267.1	PF03439	Spt5-NGN	87	10028.7	9.1	8	11	1429	18450	18450	24.76	95.17	-0.17	1	1.74	P40925.4	PF02866	Ldh_1_C	176	19604.3	6.4	24	23	2765	27960	27960	20.94	85.28	-0.308	4
O00267.1	PF00467	KOW	32	3564.07	4.58	6	3	503	0	0	7.64	109.38	0.328	1	1.74	P40925.4	PF02866	Ldh_1_C	176	19604.3	6.4	24	23	2765	27960	27960	20.94	85.28	-0.308	4
Q8TDY2.3	PF10377	ATG11	134	15450.9	9.79	15	23	2205	11460	11460	51.42	90.9	-0.454	5	1.74	Q6P1L8	PF00238	Ribosomal_L14	115	12687.9	10.38	7	20	1821	4595	4470	23.3	90.61	-0.359	5
Q07864.5	PF03104	DNA_pol_B_exo1	342	39715.1	5.46	56	44	5561	44600	44350	42.5	82.05	-0.487	1	1.74	P39023.2		Ribosomal_L3 PF00297	375	42893.2	10.22	34	79	6135	44140	43890	30.84	76.59	-0.607	4
Q07864.5	PF00136	DNA_pol_B	528	60806	8.83	69	78	8564	80385	79760	46.37	81.5	-0.389	1	1.74	P39023.2		Ribosomal_L3 PF00297	375	42893.2	10.22	34	79	6135	44140	43890	30.84	76.59	-0.607	4
Q07864.5	PF08490	DUF1744	389	44545.1	6.06	46	38	6236	58370	57870	58.03	93.52	-0.142	1	1.74	P39023.2		Ribosomal_L3 PF00297	375	42893.2	10.22	34	79	6135	44140	43890	30.84	76.59	-0.607	4
Q9Y5N6.1	PF05460	ORC6	91	10096.9	8.94	9	13	1437	10220	9970	52.66	104.07	0.045	1	1.74	P33402.1	PF07700	HNOB	161	18645.2	5.98	23	18	2595	9190	8940	57.67	81.18	-0.371	4
Q9Y5N6.1	PF05460	ORC6	91	10096.9	8.94	9	13	1437	10220	9970	52.66	104.07	0.045	1	1.74	P33402.1	PF07701	HNOBA	191	21632.2	7.85	27	28	3081	1740	1490	40.87	95.39	-0.243	4
Q9Y5N6.1	PF05460	ORC6	91	10096.9	8.94	9	13	1437	10220	9970	52.66	104.07	0.045	1	1.74	P33402.1	PF00211	Guanylate_cyc	188	21155.7	7.08	20	20	2973	9315	8940	32.2	89.68	0.046	4
Q13416.2	PF04084	ORC2	311	36043.3	7.15	33	33	5108	43890	43890	47.31	102.48	-0.279	1	1.74	P49789.3	PF01230	HIT	97	10824.6	9.43	9	12	1549	0	0	24.44	96.19	-0.072	4
Q13285.2	PF00105	zf-C4	70	8104.48	9.2	5	13	1118	4970	4470	66.67	50	-0.56	1	1.74	P41252.2	PF00133	tRNA-synt_1	612	70750.8	5.9	80	71	9873	140565	139690	38.28	79.59	-0.297	4
Q13285.2	PF00104	Hormone_recep	193	22168.9	6.06	22	18	3150	18825	18450	42.25	115.7	0.144	1	1.74	P41252.2	PF00133	tRNA-synt_1	612	70750.8	5.9	80	71	9873	140565	139690	38.28	79.59	-0.297	4
Q13285.2	PF00105	zf-C4	70	8104.48	9.2	5	13	1118	4970	4470	66.67	50	-0.56	1	1.74	P41252.2	PF08264	Anticodon_1	160	18839.4	8.89	19	22	2703	21555	21430	41.66	112.56	0.101	4
Q13285.2	PF00104	Hormone_recep	193	22168.9	6.06	22	18	3150	18825	18450	42.25	115.7	0.144	1	1.74	P41252.2	PF08264	Anticodon_1	160	18839.4	8.89	19	22	2703	21555	21430	41.66	112.56	0.101	4
Q16533.1	PF09808	SNAPc_SNAP43	185	22293.9	9.07	24	29	3138	28545	28420	27.29	81.73	-0.427	1	1.74	Q9NVV4	PF17797	RL	71	8401.46	7.02	8	8	1161	4595	4470	45.54	64.51	-0.632	9
Q16533.1	PF09808	SNAPc_SNAP43	185	22293.9	9.07	24	29	3138	28545	28420	27.29	81.73	-0.427	1	1.74	Q9NVV4	PF03828	PAP_assoc	49	5800.48	4.77	7	5	810	2980	0	42.8	73.67	-0.635	8
Q5THR3.1	PF08976	EF-hand_11	95	10659.3	9.22	10	12	1529	2980	0	34.74	105.68	-0.122	1	1.74	Q9HBU6	PF01633	Choline_kinase	206	23750.1	5.09	28	18	3307	34755	34380	41.1	94.17	-0.208	4
Q5THR3.1	PF13833	EF-hand_8	53	6053.9	4.06	11	4	838	1490	1490	33.95	84.53	-0.211	1	1.74	Q9HBU6	PF01633	Choline_kinase	206	23750.1	5.09	28	18	3307	34755	34380	41.1	94.17	-0.208	4
Q5THR3.1	PF13499	EF-hand_7	63	7494.46	5.71	8	8	1049	7450	0	50。93	82.06	-0.322	1	1.74	Q9HBU6	PF01633	Choline_kinase	206	23750.1	5.09	28	18	3307	34755	34380	41.1	94.17	-0.208	4
Q15562	PF01285	TEA	70	8087.37	10.2	7	14	1155	9970	9970	68.91	86.43	-0.623	1	1.74	Q7L3B6.1	PF08565	CDC37_M	111	13154.1	6.09	16	14	1817	17210	16960	37.55	67.75	-0.379	4
Q15562	PF17725	YBD	219	24957.3	5.92	27	22	3475	26150	25900	45.29	80.05	-0.297	1	1.74	Q7L3B6.1	PF08565	CDC37_M	111	13154.1	6.09	16	14	1817	17210	16960	37.55	67.75	-0.379	4
P54803	PF02057	Glyco_hydro_59	295	33496	6.26	28	25	4662	102915	102790	40.67	84.31	-0.262	8	1.74	P62495.3	PF03463	eRF1_1	123	13561.9	9.58	11	18	1958	4595	4470	24.66	103.82	-0.098	4
P54803	PF02057	Glyco_hydro_59	295	33496	6.26	28	25	4662	102915	102790	40.67	84.31	-0.262	8	1.74	P62495.3	PF03464	eRF1_2	133	14630.7	9.52	14	18	2078	2980	0	31.04	91.58	-0.195	4
P54803	PF02057	Glyco_hydro_59	295	33496	6.26	28	25	4662	102915	102790	40.67	84.31	-0.262	8	1.74	P62495.3	PF03465	eRF1_3	138	15941.1	4.84	25	16	2236	16055	15930	30.04	85.43	-0.408	4
P54803	PF17387	Glyco_hydro_59M	117	13295.3	6.46	12	11	1885	16960	16960	38.96	94.1	-0.042	8	1.74	P62495.3	PF03463	eRF1_1	123	13561.9	9.58	11	18	1958	4595	4470	24.66	103.82	-0.098	4
P54803	PF17387	Glyco_hydro_59M	117	13295.3	6.46	12	11	1885	16960	16960	38.96	94.1	-0.042	8	1.74	P62495.3	PF03464	eRF1_2	133	14630.7	9.52	14	18	2078	2980	0	31.04	91.58	-0.195	4
P54803	PF17387	Glyco_hydro_59M	117	13295.3	6.46	12	11	1885	16960	16960	38.96	94.1	-0.042	8	1.74	P62495.3	PF03465	eRF1_3	138	15941.1	4.84	25	16	2236	16055	15930	30.04	85.43	-0.408	4
Q6UXN9	PF00400	WD40	41	4674.09	4.41	8	5	640	1490	1490	37.74	68.78	-0.483	1	1.74	Q9NZE8	PF01632	Ribosomal_L35p	61	7390.04	11.39	3	22	1087	12615	12490	51.81	75.08	-0.856	5
Q9HAN9.1	PF01467	CTP_transf_like	218	24946.6	9.26	26	34	3527	47690	47440	38.92	84.08	-0.567	1	1.74	Q04837.1	PF00436	SSB	111	12815.6	9.52	12	16	1812	19940	0	37.07	92.07	-0.45	5
Q9UK76	PF17054	JUPITER	71	7561.32	9.82	6	9	1042	5500	0	60.47	35.77	-0.901	1	1.74	P15559.1	PF02525	Flavodoxin_2	209	23461.2	9.05	20	24	3326	40910	40910	38.88	91.1	-0.056	4
O75150.5	PF13920	zf-C3HC4_3	48	5530.57	9.41	3	11	762	1990	1490	21.16	44.79	-0.369	1	1.74	P07741.2	PF00156	Pribosyltran	148	15843.5	6.93	17	17	2274	10095	9970	33.52	111.42	0.166	4
Q16576.1	PF12265	CAF1C_H4-bd	70	8263.47	6.19	8	6	1165	26470	0	42.26	94.57	-0.406	1	1.74	Q16822	PF17297	PEPCK_N	229	24889.6	8.51	21	24	3491	22835	22460	39.41	82.14	-0.22	5
Q16576.1	PF00400	WD40	40	4495.93	5.75	5	3	609	12615	12490	22.34	78	-0.685	1	1.74	Q16822	PF17297	PEPCK_N	229	24889.6	8.51	21	24	3491	22835	22460	39.41	82.14	-0.22	5
Q16576.1	PF12265	CAF1C_H4-bd	70	8263.47	6.19	8	6	1165	26470	0	42.26	94.57	-0.406	1	1.74	Q16822	PF00821	PEPCK_GTP	359	40002.6	6.04	44	39	5569	75315	74940	41.38	73.7	-0.311	4
Q16576.1	PF00400	WD40	40	4495.93	5.75	5	3	609	12615	12490	22.34	78	-0.685	1	1.74	Q16822	PF00821	PEPCK_GTP	359	40002.6	6.04	44	39	5569	75315	74940	41.38	73.7	-0.311	4
Q96JN0	PF05225	HTH_psq	46	5066.86	8.31	5	6	725	2980	0	52.85	97.39	-0.222	1	1.74	Q9HD33	PF06984	MRP-L47	86	10241.7	5.86	16	15	1441	17990	17990	51.01	79.3	-0.934	5
O75150.5	PF13920	zf-C3HC4_3	48	5530.57	9.41	3	11	762	1990	1490	21.16	44.79	-0.369	1	1.74	O75394	PF00471	Ribosomal_L33	50	5878.99	10.45	4	12	853	1490	1490	53.88	91.4	-0.442	5
P12956.2	PF03731	Ku_N	220	25228.7	5.78	35	31	3541	13075	12950	45.42	85.55	-0.426	1	1.74	P49753	PF04775	Bile_Hydr_Trans	126	14087.2	6.36	20	19	2011	8480	8480	36.47	99.84	-0.36	5
P12956.2	PF02735	Ku	202	23080.1	9.21	24	30	3324	10555	10430	55.55	95.99	-0.263	1	1.74	P49753	PF04775	Bile_Hydr_Trans	126	14087.2	6.36	20	19	2011	8480	8480	36.47	99.84	-0.36	5
P12956.2	PF03730	Ku_C	86	9856.12	5.65	15	13	1385	4470	0	41.96	73.6	-0.891	1	1.74	P49753	PF04775	Bile_Hydr_Trans	126	14087.2	6.36	20	19	2011	8480	8480	36.47	99.84	-0.36	5
P12956.2	PF02037	SAP	35	3949.77	9.66	3	7	576	1490	1490	22.79	94.86	-0.149	1	1.74	P49753	PF04775	Bile_Hydr_Trans	126	14087.2	6.36	20	19	2011	8480	8480	36.47	99.84	-0.36	5
P12956.2	PF03731	Ku_N	220	25228.7	5.78	35	31	3541	13075	12950	45.42	85.55	-0.426	1	1.74	P49753	PF08840	BAAT_C	210	23120.5	6.86	21	20	3247	28670	28420	42.64	87.76	-0.175	4
P12956.2	PF02735	Ku	202	23080.1	9.21	24	30	3324	10555	10430	55.55	95.99	-0.263	1	1.74	P49753	PF08840	BAAT_C	210	23120.5	6.86	21	20	3247	28670	28420	42.64	87.76	-0.175	4
P12956.2	PF03730	Ku_C	86	9856.12	5.65	15	13	1385	4470	0	41.96	73.6	-0.891	1	1.74	P49753	PF08840	BAAT_C	210	23120.5	6.86	21	20	3247	28670	28420	42.64	87.76	-0.175	4
P12956.2	PF02037	SAP	35	3949.77	9.66	3	7	576	1490	1490	22.79	94.86	-0.149	1	1.74	P49753	PF08840	BAAT_C	210	23120.5	6.86	21	20	3247	28670	28420	42.64	87.76	-0.175	4
O94864.1	PF07524	Bromo_TP	80	8994.29	5.38	10	6	1257	8605	8480	26.64	97.5	0.154	1	1.74	Q9NX20	PF00252	Ribosomal_L16	134	14872.3	9.78	13	19	2100	13980	13980	36.59	75.67	-0.264	5
Q9NV56.1	PF07904	Eaf7	145	16551.8	5.65	27	21	2296	7115	6990	57.2	68.48	-0.737	1	1.74	Q9BZL1.1	PF00240	ubiquitin	70	8173.46	8.96	9	12	1159	17085	16960	9.26	94.57	-0.474	4
Q07352.1	PF04553	Tis11B_N PF04553	105	11262.8	9.91	8	14	1584	1615	1490	62.43	69.71	-0.442	1	1.74	O43182	PF00620	RhoGAP	162	18428.2	5.79	24	19	2611	3230	2980	43.19	104.07	-0.307	4
Q07352.1	PF00642	zf-CCCH	27	3108	6.74	4	4	420	3105	2980	28.66	36.3	-0.796	1	1.74	O43182	PF00620	RhoGAP	162	18428.2	5.79	24	19	2611	3230	2980	43.19	104.07	-0.307	4
Q8IYD8.2	PF04851	ResIII	163	18168.3	9.09	9	16	2556	21930	21430	44.07	89.14	0.172	1	1.74	P32929.3	PF01053	Cys_Met_Meta_PP	377	41462.7	6.17	40	34	5836	32025	31400	32.54	94.67	-0.024	4
Q8IYD8.2	PF00271	Helicase_C	126	14379.4	8.66	17	19	2021	7115	6990	33.09	76.43	-0.477	1	1.74	P32929.3	PF01053	Cys_Met_Meta_PP	377	41462.7	6.17	40	34	5836	32025	31400	32.54	94.67	-0.024	4
Q8IYD8.2	PF16783	FANCM-MHF_bd	116	14021.6	4.8	24	12	1924	26595	26470	57.22	71.38	-0.933	1	1.74	P32929.3	PF01053	Cys_Met_Meta_PP	377	41462.7	6.17	40	34	5836	32025	31400	32.54	94.67	-0.024	4
Q8IYD8.2	PF02732	ERCC4	129	14616.9	6.35	17	16	2068	3230	2980	60.12	103.41	-0.119	1	1.74	P32929.3	PF01053	Cys_Met_Meta_PP	377	41462.7	6.17	40	34	5836	32025	31400	32.54	94.67	-0.024	4
P18074.1	PF06733	DEAD_2	185	21315.5	7.21	24	24	3000	22265	21890	52.23	95.35	-0.275	1	1.74	P55084.3	PF00108	Thiolase_N	271	29029.5	8.49	28	30	4117	6085	5960	29.56	91.81	0.051	4
P18074.1	PF06777	HBB	145	16604.2	8.71	19	21	2375	10095	9970	45.13	106.97	-0.186	1	1.74	P55084.3	PF00108	Thiolase_N	271	29029.5	8.49	28	30	4117	6085	5960	29.56	91.81	0.051	4
P18074.1	PF13307	Helicase_C_2	177	20311.2	7.95	22	23	2848	24535	24410	35.19	85.42	-0.249	1	1.74	P55084.3	PF00108	Thiolase_N	271	29029.5	8.49	28	30	4117	6085	5960	29.56	91.81	0.051	4
P18074.1	PF06733	DEAD_2	185	21315.5	7.21	24	24	3000	22265	21890	52.23	95.35	-0.275	1	1.74	P55084.3	PF02803	Thiolase_C	141	15380.6	7.94	14	15	2143	20065	19940	25.69	72.13	-0.214	7
P18074.1	PF06777	HBB	145	16604.2	8.71	19	21	2375	10095	9970	45.13	106.97	-0.186	1	1.74	P55084.3	PF02803	Thiolase_C	141	15380.6	7.94	14	15	2143	20065	19940	25.69	72.13	-0.214	7
P18074.1	PF13307	Helicase_C_2	177	20311.2	7.95	22	23	2848	24535	24410	35.19	85.42	-0.249	1	1.74	P55084.3	PF02803	Thiolase_C	141	15380.6	7.94	14	15	2143	20065	19940	25.69	72.13	-0.214	7
Q13573.1	PF02731	SKIP_SNW	161	18730.8	10.18	19	35	2656	16960	16960	44.44	60.68	-1.052	1	1.74	P31937.2	PF03446	NAD_binding_2	160	16648.2	4.73	19	13	2337	6085	5960	35.12	89.62	0.174	5
Q13573.1	PF02731	SKIP_SNW	161	18730.8	10.18	19	35	2656	16960	16960	44.44	60.68	-1.052	1	1.74	P31937.2	PF14833	NAD_binding_11	128	13557.8	9.1	7	11	1902	11585	11460	25.7	85.47	0.089	5
O75528.1	PF10198	Ada3	120	14141.2	9.66	24	30	2022	5500	0	53.91	78.17	-1.201	1	1.74	Q8N142	PF00709	Adenylsucc_synt	421	46498.3	7.64	49	50	6566	56630	56380	30.24	90.26	-0.216	4
P07686.3	PF14845	Glycohydro_20b2	123	13978	6.2	11	9	1964	24075	23950	69.27	90.41	-0.123	8	1.74	Q9NVV4	PF17797	RL	71	8401.46	7.02	8	8	1161	4595	4470	45.54	64.51	-0.632	9
P07686.3	PF00728	Glyco_hydro_20	318	36622.8	6.73	37	36	5148	75985	75860	38.35	82.74	-0.307	8	1.74	Q9NVV4	PF17797	RL	71	8401.46	7.02	8	8	1161	4595	4470	45.54	64.51	-0.632	9
P07686.3	PF14845	Glycohydro_20b2	123	13978	6.2	11	9	1964	24075	23950	69.27	90.41	-0.123	8	1.74	Q9NVV4	PF03828	PAP_assoc	53	6272.94	4.6	8	5	871	2980	0	42.36	68.11	-0.798	8
P07686.3	PF00728	Glyco_hydro_20	318	36622.8	6.73	37	36	5148	75985	75860	38.35	82.74	-0.307	8	1.74	Q9NVV4	PF03828	PAP_assoc	53	6272.94	4.6	8	5	871	2980	0	42.36	68.11	-0.798	8
Q8TCE9	PF00337	Gal-bind_lectin	133	15473.1	7.31	13	13	2177	17420	17420	40.61	90	0.085	1	1.74	Q9UHN1	PF03129	HGTP_anticodon	100	11481.4	5.3	13	10	1632	11460	11460	37.84	105.2	-0.053	5
Q8N807.2	PF00085	Thioredoxin	107	11829.9	9.25	11	14	1699	5500	5500	52.67	100.19	-0.048	6	1.74	Q9NY74	PF15350	ETAA1	572	64274.3	5.04	85	68	8908	52535	51910	48.91	65.51	-0.828	4
Q8N807.2	PF13848	Thioredoxin_6	185	21554.8	5.99	27	24	3069	10430	0	44.78	103.14	-0.203	6	1.74	Q9NY74	PF15350	ETAA1	572	64274.3	5.04	85	68	8908	52535	51910	48.91	65.51	-0.828	4
P52701.2	PF00855	PWWP	95	10975.5	9.52	10	15	1531	27960	27960	33.35	57.47	-0.676	1	1.74	Q16540	PF00276	Ribosomal_L23	80	9349.76	10.41	7	14	1325	5960	0	31.77	80.25	-0.615	5
P52701.2	PF01624	MutS_I	120	14035.4	9.45	12	19	1970	27055	26930	28.63	74.67	-0.342	1	1.74	Q16540	PF00276	Ribosomal_L23	80	9349.76	10.41	7	14	1325	5960	0	31.77	80.25	-0.615	5
P52701.2	PF05188	MutS_II	167	18600.4	5.79	22	20	2626	13200	12950	36.97	89.28	-0.168	4	1.74	Q16540	PF00276	Ribosomal_L23	80	9349.76	10.41	7	14	1325	5960	0	31.77	80.25	-0.615	5
P52701.2	PF05192	MutS_III	327	37845.6	7.62	49	50	5357	44390	43890	38.11	93.03	-0.46	5	1.74	Q16540	PF00276	Ribosomal_L23	80	9349.76	10.41	7	14	1325	5960	0	31.77	80.25	-0.615	5
P52701.2	PF05190	MutS_IV	93	11163.5	7.93	16	17	1564	20065	19940	36.67	74.52	-1.074	9	1.74	Q16540	PF00276	Ribosomal_L23	80	9349.76	10.41	7	14	1325	5960	0	31.77	80.25	-0.615	5
P52701.2	PF00488	MutS_V	195	21367.6	6.09	22	19	2990	7825	7450	38.72	86.05	0.03	1	1.74	Q16540	PF00276	Ribosomal_L23	80	9349.76	10.41	7	14	1325	5960	0	31.77	80.25	-0.615	5
P18074.1	PF06733	DEAD_2	185	21315.5	7.21	24	24	3000	22265	21890	52.23	95.35	-0.275	1	1.74	Q12849	PF00076	RRM_1	69	8126.23	5.31	12	10	1135	5960	5960	41.44	83.33	-0.504	1
P18074.1	PF06777	HBB	145	16604.2	8.71	19	21	2375	10095	9970	45.13	106.97	-0.186	1	1.74	Q12849	PF00076	RRM_1	69	8126.23	5.31	12	10	1135	5960	5960	41.44	83.33	-0.504	1
P18074.1	PF13307	Helicase_C_2	177	20311.2	7.95	22	23	2848	24535	24410	35.19	85.42	-0.249	1	1.74	Q12849	PF00076	RRM_1	69	8126.23	5.31	12	10	1135	5960	5960	41.44	83.33	-0.504	1
O94906.1	PF06424	PRP1_N	157	17912.5	4.71	38	27	2459	14440	0	48.4	50.45	-1.359	1	1.74	Q9Y3B7	PF03946	Ribosomal_L11_N	67	7307.68	10.28	6	12	1063	0	0	18.97	94.48	-0.222	5
O94906.1	PF14559	TPR_19	56	6167.94	5.23	8	7	871	12490	0	73.03	94.46	-0.302	1	1.74	Q9Y3B7	PF03946	Ribosomal_L11_N	67	7307.68	10.28	6	12	1063	0	0	18.97	94.48	-0.222	5
O94906.1	PF13181	TPR_8	31	3757.48	8.94	5	7	526	6990	6990	49.56	44.19	-1.232	1	1.74	Q9Y3B7	PF03946	Ribosomal_L11_N	67	7307.68	10.28	6	12	1063	0	0	18.97	94.48	-0.222	5
O94906.1	PF06424	PRP1_N	157	17912.5	4.71	38	27	2459	14440	0	48.4	50.45	-1.359	1	1.74	Q9Y3B7	PF00298	Ribosomal_L11	73	7737.97	9.87	6	10	1121	2980	0	37.16	109.59	0.155	5
O94906.1	PF14559	TPR_19	56	6167.94	5.23	8	7	871	12490	0	73.03	94.46	-0.302	1	1.74	Q9Y3B7	PF00298	Ribosomal_L11	73	7737.97	9.87	6	10	1121	2980	0	37.16	109.59	0.155	5
O94906.1	PF13181	TPR_8	31	3757.48	8.94	5	7	526	6990	6990	49.56	44.19	-1.232	1	1.74	Q9Y3B7	PF00298	Ribosomal_L11	73	7737.97	9.87	6	10	1121	2980	0	37.16	109.59	0.155	5
P18074.1	PF06733	DEAD_2	185	21315.5	7.21	24	24	3000	22265	21890	52.23	95.35	-0.275	1	1.74	O14920.1	PF00069	Pkinase	283	32749.5	6.43	33	31	4589	57785	57410	44.09	89.89	-0.447	7
P18074.1	PF06777	HBB	145	16604.2	8.71	19	21	2375	10095	9970	45.13	106.97	-0.186	1	1.74	O14920.1	PF18397	IKBKB_SDD	278	32584.8	9.14	39	47	4626	28335	27960	53.28	89.03	-0.612	1
P18074.1	PF13307	Helicase_C_2	177	20311.2	7.95	22	23	2848	24535	24410	35.19	85.42	-0.249	1	1.74	O14920.1	PF12179	IKKbetaNEMObind	37	4289.7	3.89	8	1	589	11000	11000	58.22	100.27	-0.284	9
Q9H8M7.1	PF13898	DUF4205	296	32812.4	5.04	39	25	4579	44055	43430	54.79	89.29	-0.023	1	1.74	Q92598.1	PF00012	HSP70	706	79255.2	5.32	107	88	11128	41215	40340	41.52	81.18	-0.419	4
O95766	PF08217	DUF1712	401	46911.9	6.05	55	49	6572	35215	34840	47.45	81.65	-0.396	8	1.74	O75880	PF02630	SCO1-SenC	137	15595.5	4.35	27	12	2174	17545	17420	26.02	84.6	-0.363	5
Q15542.3	PF04494	TFIID_NTD2	130	15833.9	5.88	20	15	2184	19035	18910	52.62	72.69	-0.771	1	1.74	P32929.3	PF01053	Cys_Met_Meta_PP	377	41462.7	6.17	40	34	5836	32025	31400	32.54	94.67	-0.024	4
Q15542.3	PF00400	WD40	38	4104.56	3.77	4	1	566	8480	8480	29.36	92.37	0.503	1	1.74	P32929.3	PF01053	Cys_Met_Meta_PP	377	41462.7	6.17	40	34	5836	32025	31400	32.54	94.67	-0.024	4
O95766	PF08217	DUF1712	401	46911.9	6.05	55	49	6572	35215	34840	47.45	81.65	-0.396	8	1.74	Q9UN86.2	PF02136	NTF2	123	14030.8	8.73	11	13	1945	11920	11920	39.73	72.76	-0.458	4
O95766	PF08217	DUF1712	401	46911.9	6.05	55	49	6572	35215	34840	47.45	81.65	-0.396	8	1.74	Q9UN86.2	PF00076	RRM_1	65	7396.59	5.16	9	7	1051	0	0	28.88	98.77	0.105	4
Q9H5J8.1	PF15333	TAF1D	218	25507.6	9.25	37	44	3571	16055	15930	60.44	56.38	-1.11	1	1.74	Q7L3B6.1	PF08565	CDC37_M	111	13154.1	6.09	16	14	1817	17210	16960	37.55	67.75	-0.379	4
Q86WB0	PF07967	zf-C3HC	130	14828.2	6.08	16	15	2061	19980	19480	60.05	72.85	-0.081	1	1.74	O75936.1	PF06155	DUF971	84	9866.23	4.58	16	9	1373	29575	29450	39.05	96.43	-0.293	4
Q86WB0	PF08600	Rsm1	97	10517	4.96	10	8	1452	11250	11000	84.53	70.41	-0.162	1	1.74	O75936.1	PF06155	DUF971	84	9866.23	4.58	16	9	1373	29575	29450	39.05	96.43	-0.293	4
Q86WB0	PF07967	zf-C3HC	130	14828.2	6.08	16	15	2061	19980	19480	60.05	72.85	-0.081	1	1.74	O75936.1	PF02668	TauD	259	29660.6	6	34	29	4142	38640	38390	30.79	79.34	-0.398	4
Q86WB0	PF08600	Rsm1	97	10517	4.96	10	8	1452	11250	11000	84.53	70.41	-0.162	1	1.74	O75936.1	PF02668	TauD	259	29660.6	6	34	29	4142	38640	38390	30.79	79.34	-0.398	4
P62875.1	PF01194	RNA_pol_N	59	6716.03	7.66	7	8	956	10220	9970	31.32	115.76	0.273	1	1.74	Q9BU02	PF01928	CYTH	188	20566.3	4.64	33	18	2898	24075	23950	47.77	95.48	-0.199	4
P41002.2	PF00646	F-box	43	4848.66	5.28	6	3	704	5500	0	50.81	156.28	0.577	4	1.74	Q16854.2	PF01712	dNK	235	27577.6	6.09	29	25	3882	52035	51910	57.01	90.47	-0.285	5
P41002.2	PF00134	Cyclin_N	126	14753.5	8.67	14	17	2107	18700	18450	38.55	115.16	0.206	1	1.74	Q16854.2	PF01712	dNK	235	27577.6	6.09	29	25	3882	52035	51910	57.01	90.47	-0.285	5
P41002.2	PF02984	Cyclin_C	124	14115.3	5.93	15	12	2000	18700	18450	29.55	104.6	-0.051	1	1.74	Q16854.2	PF01712	dNK	235	27577.6	6.09	29	25	3882	52035	51910	57.01	90.47	-0.285	5
P32780.1	PF08567	PH_TFIIH	82	9330.67	8.8	11	13	1316	8480	8480	28.6	78.66	-0.621	3	1.74	O43182	PF00620	RhoGAP	161	18331	5.79	24	19	2597	3230	2980	43.87	104.72	-0.299	4
P32780.1	PF03909	BSD	57	6973.88	8.94	6	8	959	11460	11460	57.11	54.74	-0.77	1	1.74	O43182	PF00620	RhoGAP	161	18331	5.79	24	19	2597	3230	2980	43.87	104.72	-0.299	4
O43913.1	PF13191	AAA_16	150	17220.8	5.49	18	13	2435	6210	5960	37.99	106.47	0.1	1	1.74	Q7RTR2	PF00620	RhoGAP	162	18428.2	5.79	24	19	2611	3230	2980	43.19	104.07	-0.307	4
O43913.1	PF14630	ORC5_C	255	29439.1	9.28	26	35	4200	33475	33350	34.57	99.06	-0.264	1	1.74	Q7RTR2	PF00620	RhoGAP	162	18428.2	5.79	24	19	2611	3230	2980	43.19	104.07	-0.307	4
Q9UI36	PF02437	Ski_Sno	110	12280.3	8.28	11	13	1741	4845	4470	38.12	99.09	-0.047	1	1.74	Q6P1L8	PF00238	Ribosomal_L14	115	12687.9	10.38	7	20	1821	4595	4470	23.3	90.61	-0.359	5
Q6ZYL4.1	PF06331	Tfb5	69	7797.09	4.33	11	5	1110	1490	1490	35.42	124.2	0.345	1	1.74	Q96RP9	PF00009	GTP_EFTU	276	30871.7	7.2	34	34	4372	16055	15930	41.66	96.81	-0.148	5
Q6ZYL4.1	PF06331	Tfb5	69	7797.09	4.33	11	5	1110	1490	1490	35.42	124.2	0.345	1	1.74	Q96RP9	PF03144	GTP_EFTU_D2	67	7637.68	6.77	10	10	1060	6085	5960	28.17	71.34	-0.501	5
Q6ZYL4.1	PF06331	Tfb5	69	7797.09	4.33	11	5	1110	1490	1490	35.42	124.2	0.345	1	1.74	Q96RP9	PF14492	EFG_II	75	8539.76	5.8	12	11	1197	4595	4470	24.78	70.13	-0.572	5
Q6ZYL4.1	PF06331	Tfb5	69	7797.09	4.33	11	5	1110	1490	1490	35.42	124.2	0.345	1	1.74	Q96RP9	PF03764	EFG_IV	122	13159.9	5.78	16	13	1849	2980	2980	42.82	75.98	-0.297	5
Q6ZYL4.1	PF06331	Tfb5	69	7797.09	4.33	11	5	1110	1490	1490	35.42	124.2	0.345	1	1.74	Q96RP9	PF00679	EFG_C	88	9858.02	4.2	14	5	1351	9065	8940	57.88	75.23	-0.28	5
Q7Z5Q5	PF18049	DNA_pol_P_Exo	218	24381.9	5.53	27	22	3409	29950	29450	30.44	89.86	-0.15	1	1.74	Q9UHD2.1	PF00069	Pkinase	291	32901.7	5.95	39	34	4627	35660	35410	43.61	88.38	-0.242	4
Q7Z5Q5	PF18049	DNA_pol_P_Exo	218	24381.9	5.53	27	22	3409	29950	29450	30.44	89.86	-0.15	1	1.74	Q9UHD2.1	PF18396	TBK1_ULD	88	10342	8.28	8	9	1473	7450	0	39.42	102.95	-0.177	4
Q7Z5Q5	PF18049	DNA_pol_P_Exo	218	24381.9	5.53	27	22	3409	29950	29450	30.44	89.86	-0.15	1	1.74	Q9UHD2.1	PF18394	TBK1_CCD1	256	30002.4	6.58	40	38	4231	36245	359870	50.16	89.53	-0.552	4
Q7Z5Q5	PF00476	DNA_pol_A	408	45637.8	9.32	42	53	6507	24325	23950	36.72	97.08	-0.215	1	1.74	Q9UHD2.1	PF00069	Pkinase	291	32901.7	5.95	39	34	4627	35660	35410	43.61	88.38	-0.242	4
Q7Z5Q5	PF00476	DNA_pol_A	408	45637.8	9.32	42	53	6507	24325	23950	36.72	97.08	-0.215	1	1.74	Q9UHD2.1	PF18396	TBK1_ULD	88	10342	8.28	8	9	1473	7450	0	39.42	102.95	-0.177	4
Q7Z5Q5	PF00476	DNA_pol_A	408	45637.8	9.32	42	53	6507	24325	23950	36.72	97.08	-0.215	1	1.74	Q9UHD2.1	PF18394	TBK1_CCD1	256	30002.4	6.58	40	38	4231	36245	359870	50.16	89.53	-0.552	4
Q00577.2	PF04845	PurA	221	25259.7	9.17	29	34	3552	20400	20400	46.75	74.12	-0.604	1	1.74	Q9NX20	PF00252	Ribosomal_L16	134	14872.3	9.78	13	19	2100	13980	13980	36.59	75.67	-0.246	5
Q9NWT8.1	PF08213	DUF1713	33	4292.28	11.9	1	15	634	1490	1490	74.21	73.64	-1.497	9	1.74	O43182	PF00620	RhoGAP	162	18428.2	5.79	24	19	2611	3230	2980	43.19	104.07	-0.307	4
Q13889.2	PF03850	Tfb4	279	31194.2	5.88	29	25	4391	29045	28420	50.93	100.65	0.038	1	1.74	O15169.2	PF16646	AXIN1_TNKS_BD	73	7553.22	4.31	12	6	1039	2980	2980	49.08	50.82	-0.644	4
Q13889.2	PF03850	Tfb4	279	31194.2	5.88	29	25	4391	29045	28420	50.93	100.65	0.038	1	1.74	O15169.2	PF00615	RGS	123	14225.3	5.4	18	16	1995	13200	12950	37.9	81.79	-0.385	4
Q13889.2	PF03850	Tfb4	279	31194.2	5.88	29	25	4391	29045	28420	50.93	100.65	0.038	1	1.74	O15169.2	PF08833	Axin_b-cat_bind	58	6010.66	8.61	6	7	835	0	0	79.51	58.79	-0.888	4
Q13889.2	PF03850	Tfb4	279	31194.2	5.88	29	25	4391	29045	28420	50.93	100.65	0.038	1	1.74	O15169.2	PF00778	DIX	80	9292.72	5.48	14	13	1319	9065	8940	15.03	87.5	-0.191	4
Q13610.1	PF00400	WD40	40	4283.76	5.47	5	4	603	11000	0	31.83	102.5	-0.165	1	1.74	Q8TDY4.1	PF16746	BAR_3	233	26657.3	7.89	31	32	3747	16960	16960	40.05	83	-0.588	4
Q13610.1	PF00400	WD40	40	4283.76	5.47	5	4	603	11000	0	31.83	102.5	-0.165	1	1.74	Q8TDY4.1	PF01412	ArfGap	119	13057	7.79	12	13	1814	8855	8480	32.35	80.34	-0.221	4
Q13610.1	PF00400	WD40	40	4283.76	5.47	5	4	603	11000	0	31.83	102.5	-0.165	1	1.74	Q8TDY4.1	PF12796	Ank_2	93	9985.42	6.19	11	9	1417	3105	2980	21.24	107.2	-0.096	4
P35244.1	PF08661	Rep_fac-A_3	109	12232.1	5.08	16	11	1725	4595	4470	36.79	93.85	-0.023	1	1.74	P30838	PF00171	Aldedh	428	47534.6	5.81	51	44	6705	47705	47330	46.6	92.27	-0.17	4
Q13416.2	PF04084	ORC2	311	36043.3	7.15	33	33	5108	43890	43890	47.31	102.48	-0.279	1	1.74	Q9BYG8	PF04598	Gasdermin	237	26798.9	8.37	32	34	3824	20065	19940	51.39	97.76	-0.282	4
Q13416.2	PF04084	ORC2	311	36043.3	7.15	33	33	5108	43890	43890	47.31	102.48	-0.279	1	1.74	Q9BYG8	PF17708	Gasdermin_C	170	19598.7	5.05	23	16	2773	22585	22460	57.48	105.59	-0.173	4
O75446.1	PF13866	zf-SAP30	72	8218.41	9.97	8	18	1157	3230	2980	54.5	67.78	-1.067	1	1.74	P24666.3	PF01451	LMWPc	146	16730	6.14	19	18	2315	16430	15930	53.33	76.78	-0.425	4
O75446.1	PF13867	SAP30_Sin3_bdg	53	6289.4	10.22	3	10	907	4470	4470	53.71	95.47	-0.383	1	1.74	P24666.3	PF01451	LMWPc	146	16730	6.14	19	18	2315	16430	15930	53.33	76.78	-0.425	4
Q8TAE8.1	PF10147	CR6_interact	211	24414.9	10.11	29	42	3444	40450	40450	75.12	66.35	-1.046	5	1.74	P29144	PF00082	Peptidase_S8	466	49811.9	5.38	54	41	6936	68340	67840	32.39	83.07	-0.279	4
Q8TAE8.1	PF10147	CR6_interact	211	24414.9	10.11	29	42	3444	40450	40450	75.12	66.35	-1.046	5	1.74	P29144	PF12580	TPPII	188	21574.7	8.35	21	23	3048	23045	22920	35.16	88.14	-0.531	4
P06746.3	PF14716	HHH_8	67	7289.42	9.48	7	11	1045	4470	0	12.65	86.12	-0.376	4	1.74	O75936.1	PF06155	DUF971	84	9866.23	4.58	16	9	1373	29575	29450	39.05	96.43	-0.293	4
P06746.3	PF10391	DNA_pol_lambd_f	50	5761.5	8.35	8	9	813	1490	0	7.5	78	-0.762	1	1.74	O75936.1	PF06155	DUF971	84	9866.23	4.58	16	9	1373	29575	29450	39.05	96.43	-0.293	4
P06746.3	PF14792	DNA_pol_B_palm	114	13127.1	7.09	17	17	1855	3105	2980	38.9	82.81	-0.578	1	1.74	O75936.1	PF06155	DUF971	84	9866.23	4.58	16	9	1373	29575	29450	39.05	96.43	-0.293	4
P06746.3	PF14791	DNA_pol_B_thumb	67	7695.69	5.72	10	9	1078	11460	0	26.16	74.18	-0.549	4	1.74	O75936.1	PF06155	DUF971	84	9866.23	4.58	16	9	1373	29575	29450	39.05	96.43	-0.293	4
P06746.3	PF14716	HHH_8	67	7289.42	9.48	7	11	1045	4470	0	12.65	86.12	-0.376	4	1.74	O75936.1	PF02668	TauD	260	29807.8	6	34	29	4162	38640	38390	31.18	79.04	-0.386	4
P06746.3	PF10391	DNA_pol_lambd_f	50	5761.5	8.35	8	9	813	1490	0	7.5	78	-0.762	1	1.74	O75936.1	PF02668	TauD	260	29807.8	6	34	29	4162	38640	38390	31.18	79.04	-0.386	4
P06746.3	PF14792	DNA_pol_B_palm	114	13127.1	7.09	17	17	1855	3105	2980	38.9	82.81	-0.578	1	1.74	O75936.1	PF02668	TauD	260	29807.8	6	34	29	4162	38640	38390	31.18	79.04	-0.386	4
P06746.3	PF14791	DNA_pol_B_thumb	67	7695.69	5.72	10	9	1078	11460	0	26.16	74.18	-0.549	4	1.74	O75936.1	PF02668	TauD	260	29807.8	6	34	29	4162	38640	38390	31.18	79.04	-0.386	4
P78527.3	PF08163	NUC194	297	34527.3	6.12	44	40	4815	25370	24870	57.85	78.45	-0.48	1	1.74	P82914	PF00312	Ribosomal_S15	82	9902.58	9.72	12	19	1416	9970	9970	49.18	86.83	-0.862	5
P78527.3	PF02259	FAT	448	51310.4	5.11	64	50	7203	55850	55350	65.23	92.34	-0.409	1	1.74	P82914	PF00312	Ribosomal_S15	82	9902.58	9.72	12	19	1416	9970	9970	49.18	86.83	-0.862	5
P78527.3	PF00454	PI3_PI4_kinase	269	30523.4	8.45	28	30	4289	31065	30940	49.22	85.2	-0.135	1	1.74	P82914	PF00312	Ribosomal_S15	82	9902.58	9.72	12	19	1416	9970	9970	49.18	86.83	-0.862	5
P78527.3	PF02260	FATC	32	3722.18	4.08	6	2	506	16500	16500	57.73	60.94	-0.678	1	1.74	P82914	PF00312	Ribosomal_S15	82	9902.58	9.72	12	19	1416	9970	9970	49.18	86.83	-0.862	5
Q15562	PF01285	TEA	70	8087.37	10.2	7	14	1155	9970	9970	68.91	86.43	-0.623	1	1.74	Q5JY77.3	PF04826	Arm_2	250	28507.7	5	35	24	4007	9190	8940	45.95	95.56	-0.13	4
Q15562	PF17725	YBD	219	24957.3	5.92	27	22	3475	26150	25900	45.29	80.05	-0.297	1	1.74	Q5JY77.3	PF04826	Arm_2	250	28507.7	5	35	24	4007	9190	8940	45.95	95.56	-0.13	4
P51946.1	PF00134	Cyclin_N	129	14998.6	6.99	14	14	2114	9315	8940	50.27	94.42	0.027	1	1.74	Q96HU1.1	PF00566	RabGAP-TBC	209	24131.3	6.24	24	22	3442	36565	36440	57.5	115.74	0.167	4
P51946.1	PF00134	Cyclin_N	129	14998.6	6.99	14	14	2114	9315	8940	50.27	94.42	0.027	1	1.74	Q96HU1.1	PF00018	SH3_1	46	5385.01	4.82	10	6	746	11000	111000	22.98	84.78	-0.613	4
P51946.1	PF00134	Cyclin_N	129	14998.6	6.99	14	14	2114	9315	8940	50.27	94.42	0.027	1	1.74	Q96HU1.1	PF02759	RUN	185	20986.2	5.25	26	19	2955	39460	38960	43.1	102.65	0.063	4
P51946.1	PF16899	Cyclin_C_2	109	12546.6	6.5	14	14	1788	8940	8940	44.66	101.19	-0.234	1	1.74	Q96HU1.1	PF00566	RabGAP-TBC	209	24131.3	6.24	24	22	3442	36565	36440	57.5	115.74	0.167	4
P51946.1	PF16899	Cyclin_C_2	109	12546.6	6.5	14	14	1788	8940	8940	44.66	101.19	-0.234	1	1.74	Q96HU1.1	PF00018	SH3_1	46	5385.01	4.82	10	6	746	11000	111000	22.98	84.78	-0.613	4
P51946.1	PF16899	Cyclin_C_2	109	12546.6	6.5	14	14	1788	8940	8940	44.66	101.19	-0.234	1	1.74	Q96HU1.1	PF02759	RUN	185	20986.2	5.25	26	19	2955	39460	38960	43.1	102.65	0.063	4
Q8WUA4.2	PF00400	WD40	43	5056.84	9.24	3	6	707	12615	12490	8.91	77.21	-0.214	1	1.74	O60551.1	PF01233	NMT	156	18067	6.97	20	20	2570	31065	30940	56.13	103.65	-0.119	4
Q8WUA4.2	PF00400	WD40	43	5056.84	9.24	3	6	707	12615	12490	8.91	77.21	-0.214	1	1.74	O60551.1	PF02799	NMT_C	187	21629	6.8	23	22	3053	22920	22920	42.6	88.07	-0.273	2
P62304.1	PF01423	LSM	67	7972.21	8.11	9	10	1127	9970	9970	69.64	101.79	-0.485	1	1.74	P51857	PF00248	Aldo_ket_red	285	32538.5	8.61	34	38	4608	40255	39880	39.02	92	-0.347	4
Q9C002	PF06522	B12D	68	7793.1	8.27	8	9	1123	17990	0	44.71	98.82	-0.238	1	1.74	Q99558.2	PF00069	Pkinase	249	27198.4	6.05	29	24	3804	24575	23950	45.86	90.08	-0.08	1
P12956.2	PF03731	Ku_N	220	25228.7	5.78	35	31	3541	13075	12950	45.42	85.55	-0.426	1	1.74	P49914.2	PF01812	5-FTHF_cyc-lig	189	22034.3	8.4	28	30	3110	16055	15930	60.08	85.61	-0.601	4
P12956.2	PF02735	Ku	202	23080.1	9.21	24	30	3324	10555	10430	55.55	95.99	-0.263	1	1.74	P49914.2	PF01812	5-FTHF_cyc-lig	189	22034.3	8.4	28	30	3110	16055	15930	60.08	85.61	-0.601	4
P12956.2	PF03730	Ku_C	86	9856.12	5.65	15	13	1385	4470	0	41.96	73.6	-0.891	1	1.74	P49914.2	PF01812	5-FTHF_cyc-lig	189	22034.3	8.4	28	30	3110	16055	15930	60.08	85.61	-0.601	4
P12956.2	PF02037	SAP	35	3949.77	9.66	3	7	576	1490	1490	22.79	94.86	-0.149	1	1.74	P49914.2	PF01812	5-FTHF_cyc-lig	189	22034.3	8.4	28	30	3110	16055	15930	60.08	85.61	-0.601	4
O60583.2	PF00134	Cyclin_N	140	16221.7	6.98	15	15	2287	10220	9970	66.61	94.79	-0.94	1	1.74	P28799.2	PF00396	Granulin	42	4340.87	6.2	3	2	562	500	0	73.18	30.24	0.176	3
Q9H9Q4.1	PF03265	DNase_II	330	36445.9	6.67	24	23	5026	87360	86860	45.36	67.39	-0.361	8	1.74	O60239.2	PF05276	SH3BP5	231	27021.8	9.28	41	47	3829	19940	0	44.75	76.54	-0.977	5
Q9H4I2.3	PF18387	zf_C2H2_ZHX	53	5685.36	5.34	6	3	780	5625	5500	38.76	69.81	-0.142	1	1.74	P06132.2	PF01208	URO-D	347	38590.4	5.77	41	34	5429	44265	43890	48.53	90	-0.096	4
Q9H4I2.3	PF00046	Homeodomain	53	6278.06	10.03	5	11	871	7115	6990	36.14	47.74	-1.198	1	1.74	P06132.2	PF01208	URO-D	347	38590.4	5.77	41	34	5429	44265	43890	48.53	90	-0.096	4
Q9H4I2.3	PF11569	Homez	48	5889.62	4.87	9	6	803	9970	9970	96.11	50.83	-1.177	1	1.74	P06132.2	PF01208	URO-D	347	38590.4	5.77	41	34	5429	44265	43890	48.53	90	-0.096	4
P09430	PF02079	TP1	51	5955.82	12.09	2	21	849	2980	0	62.85	22.94	-2.169	1	1.74	P48147.2	PF02897	Peptidase_S9_N	417	48228.2	4.86	67	44	6676	84855	84230	42.79	75.68	-0.494	4
P09430	PF02079	TP1	51	5955.82	12.09	2	21	849	2980	0	62.85	22.94	-2.169	1	1.74	P48147.2	PF00326	Peptidase_S9	226	24980.7	8.01	22	23	3498	30285	29910	33.24	88.89	-0.127	4
Q9H0W9	PF08925	DUF1907	284	31733.6	6.83	32	31	4452	22390	21890	45.67	78.91	-0.213	1	1.74	P13995	PF00763	THF_DHG_CYH	117	12942.7	5.15	18	13	1837	6990	6990	49.59	109.06	-0.362	4
Q9H0W9	PF08925	DUF1907	284	31733.6	6.83	32	31	4452	22390	21890	45.67	78.91	-0.213	1	1.74	P13995	PF02882	THF_DHG_CYH_C	175	18656	9.55	14	20	2681	15470	15470	12.6	104.69	0.145	5
Q9H0W9	PF08925	DUF1907	284	31733.6	6.83	32	31	4452	22390	21890	45.67	78.91	-0.213	1	1.74	P47874.2	PF06554	Olfactory_mark	151	17514	5.61	22	21	2476	24980	0	31.26	88.41	-0.517	4
Q15573.1	PF14929	TAF1_subA	361	42604	9.08	39	48	5986	107385	107260	40.7	84.1	-0.437	1	1.74	Q8WWV3.2	PF08240	ADH_N	98	10660.2	5.88	12	10	1502	13980	13980	20.29	89.29	-0.088	5
Q15573.1	PF14929	TAF1_subA	361	42604	9.08	39	48	5986	107385	107260	40.7	84.1	-0.437	1	1.74	Q8WWV3.2	PF13602	ADH_zinc_N_2	147	16265.8	6.33	18	17	2303	26470	26470	22.93	88.84	-0.007	5
Q9BXL8	PF06031	SERTA	36	4150.98	5.53	4	3	597	125	0	71.83	143.33	0.425	1	1.74	Q9BYC9.1	PF00453	Ribosomal_L20	106	12660.1	11.03	6	27	1831	13075	12950	12	92.92	-0.517	5
P61218.1	PF01192	RNA_pol_Rpb6	54	6131.43	9.43	6	9	890	2980	2980	22.55	106.67	0.054	1	1.74	Q9NP74	PF03285	Paralemmin	448	51003.4	5.01	85	56	7103	26360	26360	62.53	69.2	-1.052	4
P27694.2	PF04057	Rep-A_N	100	11121.1	8.02	9	10	1596	1615	1490	39.83	117.9	0.118	4	1.74	Q9HCY8.1	PF01023	S_100	42	4819.51	5.47	6	4	685	1490	0	43.32	97.38	-0.443	4
P27694.2	PF01336	tRNA_anti-codon	90	10394.7	8.05	11	12	1455	15470	15470	17.43	71.44	-0.471	1	1.74	Q9HCY8.1	PF01023	S_100	42	4819.51	5.47	6	4	685	1490	0	43.32	97.38	-0.443	4
P27694.2	PF16900	REPA_OB_2	98	10637	6.43	14	14	1505	8480	8480	37.88	94.49	-0.271	1	1.74	Q9HCY8.1	PF01023	S_100	42	4819.51	5.47	6	4	685	1490	0	43.32	97.38	-0.443	4
P27694.2	PF08646	Rep_fac-A_C	146	17255.5	5.63	21	20	2384	19285	18910	34.44	67.4	-0.576	1	1.74	Q9HCY8.1	PF01023	S_100	42	4819.51	5.47	6	4	685	1490	0	43.32	97.38	-0.443	4
P09012.3	PF00076	RRM_1	72	8377.86	9.92	6	12	1202	4470	0	41.57	93.47	-0.172	1	1.74	Q8N183	PF05071	NDUFA12	110	1366.98	6.97	21	21	1870	25440	0	42.53	63.82	-1.285	5
P61218.1	PF01192	RNA_pol_Rpb6	54	6131.43	9.43	6	9	890	2980	2980	22.55	106.67	0.054	1	1.74	Q8TCS8	PF01138	RNase_PH	132	14126.2	8.83	13	15	2011	5960	5960	35.32	99.02	0.011	5
P61218.1	PF01192	RNA_pol_Rpb6	54	6131.43	9.43	6	9	890	2980	2980	22.55	106.67	0.054	1	1.74	Q8TCS8	PF03725	RNase_PH_C	66	7014.15	6.76	6	6	1001	2980	2980	42.94	107.73	0.226	5
P61218.1	PF01192	RNA_pol_Rpb6	54	6131.43	9.43	6	9	890	2980	2980	22.55	106.67	0.054	1	1.74	Q8TCS8	PF03726	PNPase	82	9815.07	5.03	19	14	1376	7450	7450	43.86	81.95	-0.732	5
P61218.1	PF01192	RNA_pol_Rpb6	54	6131.43	9.43	6	9	890	2980	2980	22.55	106.67	0.054	1	1.74	Q8TCS8	PF00013	KH_1	60	6553.41	5.16	8	6	924	1490	0	41.08	74.67	-0.243	7
P61218.1	PF01192	RNA_pol_Rpb6	54	6131.43	9.43	6	9	890	2980	2980	22.55	106.67	0.054	1	1.74	Q8TCS8	PF00575	S1	76	8630.01	9.52	8	11	1230	4470	0	12.3	91.05	-0.372	3
O60762.1	PF00535	Glycos_transf_2	172	19533.6	9.22	21	25	2794	22920	0	15.79	103.72	-0.277	6	1.74	Q16822	PF17297	PEPCK_N	229	24889.6	8.51	21	24	3491	22835	22460	39.41	82.14	-0.22	5
O60762.1	PF00535	Glycos_transf_2	172	19533.6	9.22	21	25	2794	22920	0	15.79	103.72	-0.277	6	1.74	Q16822	PF00821	PEPCK_GTP	360	40188.8	6.04	44	39	5593	80815	80440	41.63	73.5	-0.312	4
Q8N9N5	PF10523	BEN	70	8205.51	9.47	6	11	1159	17085	16960	35.71	85	-0.411	1	1.74	Q16822	PF17297	PEPCK_N	229	24889.6	8.51	21	24	3491	22835	22460	39.41	82.14	-0.22	5
Q8N9N5	PF10523	BEN	70	8205.51	9.47	6	11	1159	17085	16960	35.71	85	-0.411	1	1.74	Q16822	PF00821	PEPCK_GTP	360	40188.8	6.04	44	39	5593	80815	80440	41.63	73.5	-0.312	4
O95926	PF08231	SYF2	149	17960	8.06	31	32	2508	18910	0	50.45	59.66	-1.385	1	1.74	O43182	PF00620	RhoGAP	162	18428.2	5.79	24	19	2611	3230	2980	43.19	104.07	-0.307	4
P18858.1	PF04675	DNA_ligase_A_N	177	18908	9.91	16	22	2732	2980	2980	44.89	113.56	0.154	1	1.74	Q9BZL1.1	PF00240	ubiquitin	70	8173.46	8.96	9	12	1159	17085	16960	9.26	94.57	-0.474	4
P18858.1	PF01068	DNA_ligase_A_M	205	23704	5.58	34	30	3353	20065	19940	44.84	88.93	-0.465	1	1.74	Q9BZL1.1	PF00240	ubiquitin	70	8173.46	8.96	9	12	1159	17085	16960	9.26	94.57	-0.474	4
P18858.1	PF04679	DNA_ligase_A_C	112	12554.2	5.12	19	14	1763	17085	16960	44.8	92.32	-0.327	1	1.74	Q9BZL1.1	PF00240	ubiquitin	70	8173.46	8.96	9	12	1159	17085	16960	9.26	94.57	-0.474	4
Q13573.1	PF02731	SKIP_SNW	161	18730.8	10.18	19	35	2656	16960	16960	44.44	60.68	-1.052	1	1.74	O60551.1	PF01233	NMT	108	12656.4	4.55	18	11	1768	29450	29450	57.2	91.11	-0.341	4
Q13573.1	PF02731	SKIP_SNW	161	18730.8	10.18	19	35	2656	16960	16960	44.44	60.68	-1.052	1	1.74	O60551.1	PF02799	NMT_C	187	21629	6.8	23	22	3053	22920	22920	42.6	88.07	-0.273	2
Q9UGU0.3	PF13771	zf-HC5HC2H	69	7741.86	5.39	9	5	1049	13450	12950	36.28	82.17	-0.055	1	1.74	P54136.2	PF03485	Arg_tRNA_synt_N	89	9901.31	5.85	11	9	1393	3105	2980	43.79	85.51	-0.434	4
Q9UGU0.3	PF13771	zf-HC5HC2H	69	7741.86	5.39	9	5	1049	13450	12950	36.28	82.17	-0.055	1	1.74	P54136.2	PF00750	tRNA-synt_1d	347	39439.2	6.05	50	46	5566	36120	35870	35.29	90.4	-0.267	4
Q9UGU0.3	PF13771	zf-HC5HC2H	69	7741.86	5.39	9	5	1049	13450	12950	36.28	82.17	-0.055	1	1.74	P54136.2	PF05746	DALR_1	127	14937.7	7.78	18	19	2130	18700	18450	46.44	109.13	0.069	4
O43543.1	PF08423	Rad51	243	27864	6.07	29	24	3890	25035	24410	48.09	91.81	-0.091	1	1.74	Q9Y2J8	PF08526	PAD_N	114	12718.2	4.92	15	10	1773	25440	0	42.64	82.89	-0.282	4
O43543.1	PF08423	Rad51	243	27864	6.07	29	24	3890	25035	24410	48.09	91.81	-0.091	1	1.74	Q9Y2J8	PF08527	PAD_M	159	18048.6	4.99	26	19	2532	27055	26930	35.87	90	-0.276	4
O43543.1	PF08423	Rad51	243	27864	6.07	29	24	3890	25035	24410	48.09	91.81	-0.091	1	1.74	Q9Y2J8	PF03068	PAD	379	43401.5	6.13	49	45	6124	47035	46410	47.99	89.92	-0.123	3
Q96BP2	PF06747	CHCH	35	4100.76	5	6	5	553	5750	5500	74.62	53.14	-0.289	1	1.74	O75570	PF03462	PCRF	201	23436.4	5.64	30	23	3260	22140	21890	58.37	81.04	-0.726	5
Q96BP2	PF06747	CHCH	35	4100.76	5	6	5	553	5750	5500	74.62	53.14	-0.289	1	1.74	O75570	PF00472	RF-1	111	12925.6	10.07	15	23	1835	2980	2980	54.4	81.62	-0.974	5
P62875.1	PF01194	RNA_pol_N	59	6716.03	7.66	7	8	956	10220	9970	31.32	115.76	0.273	1	1.74	P17987.1	PF00118	Cpn60_TCP1	508	55293.2	6.41	65	63	7908	17920	17420	30.61	110.02	0.031	4
P61218.1	PF01192	RNA_pol_Rpb6	54	6131.43	9.43	6	9	890	2980	2980	22.55	106.67	0.054	1	1.74	P54098.1	PF18136	DNApol_Exo	294	33415.1	6.02	33	29	4678	72670	72420	48.42	82.96	-0.393	5
P61218.1	PF01192	RNA_pol_Rpb6	54	6131.43	9.43	6	9	890	2980	2980	22.55	106.67	0.054	1	1.74	P54098.1	PF00476	DNA_pol_A	432	48539.5	8.45	49	52	6797	88265	87890	44.43	82.01	-0.279	5
Q9Y294.1	PF04729	ASF1_hist_chap	154	17557.8	4.42	23	11	2447	21555	21430	49.23	89.09	-0.196	1	1.74	O75534.2	PF00313	CSD	65	7378.4	6.85	9	9	1041	3105	2980	23.04	89.85	-0.303	4
Q9Y294.1	PF04729	ASF1_hist_chap	154	17557.8	4.42	23	11	2447	21555	21430	49.23	89.09	-0.196	1	1.74	O75534.2	PF12901	SUZ-C	32	3470.97	6.16	4	4	487	0	0	32.47	79.38	-0.447	4
Q9UDW3	PF06220	zf-U1	37	4611.29	9.76	3	9	640	10095	9970	46.22	52.7	-1.327	1	1.74	O43776.1	PF01336	tRNA_anti-codon	81	9074.59	7.85	7	8	1276	15720	15470	31.71	99.75	0.102	4
Q9UDW3	PF00642	zf-CCCH	27	3161.64	9.61	1	5	429	125	0	48.43	28.89	-0.819	1	1.74	O43776.1	PF01336	tRNA_anti-codon	81	9074.59	7.85	7	8	1276	15720	15470	31.71	99.75	0.102	4
Q9UDW3	PF06220	zf-U1	37	4611.29	9.76	3	9	640	10095	9970	46.22	52.7	-1.327	1	1.74	O43776.1	PF00152	tRNA-synt_2	319	37197.4	5.23	49	37	5170	42330	41830	48.89	79.09	-0.399	4
Q9UDW3	PF00642	zf-CCCH	27	3161.64	9.61	1	5	429	125	0	48.43	28.89	-0.819	1	1.74	O43776.1	PF00152	tRNA-synt_2	319	37197.4	5.23	49	37	5170	42330	41830	48.89	79.09	-0.399	4
P13984.2	PF17683	TFIIF_beta_N	93	10051.4	9.16	9	11	1426	12490	0	38.75	84.84	-0.349	1	1.74	Q2VPK5	PF10288	CTU2	128	13752.7	7.44	12	13	1893	9105	8480	60.47	65.62	-0.59	4
P13984.2	PF02270	TFIIF_beta	64	7699.94	8.94	9	11	1102	11460	0	19.3	97.34	-0.642	1	1.74	Q2VPK5	PF10288	CTU2	128	13752.7	7.44	12	13	1893	9105	8480	60.47	65.62	-0.59	4
Q9Y618	PF15784	GPS2_interact	89	10115.6	5.41	16	13	1450	0	0	81.49	83.15	-0.97	1	1.74	Q9Y2J8	PF08526	PAD_N	114	12718.2	4.92	15	10	1773	25440	0	42.64	82.89	-0.282	4
Q9Y618	PF15784	GPS2_interact	89	10115.6	5.41	16	13	1450	0	0	81.49	83.15	-0.97	1	1.74	Q9Y2J8	PF08527	PAD_M	159	18048.6	4.99	26	19	2532	27055	26930	35.87	90	-0.276	4
Q9Y618	PF15784	GPS2_interact	89	10115.6	5.41	16	13	1450	0	0	81.49	83.15	-0.97	1	1.74	Q9Y2J8	PF03068	PAD	379	43401.5	6.13	49	45	6124	47035	46410	47.99	89.92	-0.123	4
Q9Y618	PF00249	Myb_DNA-binding	46	5400.11	9.36	5	8	745	13980	13980	44.91	44.57	-0.904	1	1.74	Q9Y2J8	PF08526	PAD_N	114	12718.2	4.92	15	10	1773	25440	0	42.64	82.89	-0.282	4
Q9Y618	PF00249	Myb_DNA-binding	46	5400.11	9.36	5	8	745	13980	13980	44.91	44.57	-0.904	1	1.74	Q9Y2J8	PF08527	PAD_M	159	18048.6	4.99	26	19	2532	27055	26930	35.87	90	-0.276	4
Q9Y618	PF00249	Myb_DNA-binding	46	5400.11	9.36	5	8	745	13980	13980	44.91	44.57	-0.904	1	1.74	Q9Y2J8	PF03068	PAD	379	43401.5	6.13	49	45	6124	47035	46410	47.99	89.92	-0.123	4
O14497.3	PF01388	ARID	86	9849.42	9.63	8	14	1398	18450	18450	28.88	82.79	-0.428	1	1.74	Q16854.2	PF01712	dNK	235	27577.6	6.09	29	25	3882	52035	51910	57.01	90.47	-0.285	4
O14497.3	PF12031	BAF250_C	256	28389.8	5.38	28	21	4009	26845	26470	44.74	102.46	-0.029	1	1.74	Q16854.2	PF01712	dNK	235	27577.6	6.09	29	25	3882	52035	51910	57.01	90.47	-0.285	4
Q14781.2	PF00385	Chromo	50	6014.05	9.8	6	11	863	17990	17990	61.48	89.8	-0.682	1	1.74	Q8N1V2.3	PF00400	WD40	44	4847.45	5.45	4	3	671	6990	6990	41.87	82.05	-0.075	4
Q14781.2	PF17218	CBX7_C	33	3713.2	5.48	4	3	529	5500	0	48.15	94.24	-0.152	1	1.74	Q8N1V2.3	PF00400	WD40	44	4847.45	5.45	4	3	671	6990	6990	41.87	82.05	-0.075	4
P18858.1	PF04675	DNA_ligase_A_N	177	18908	9.91	16	22	2732	2980	2980	44.89	113.56	0.154	1	1.74	Q96M11.1	PF15311	HYLS1_C	89	10735.3	9.94	12	20	1514	22585	22460	72.33	73.37	-1.088	4
P18858.1	PF01068	DNA_ligase_A_M	205	23704	5.58	34	30	3353	20065	19940	44.84	88.93	-0.465	1	1.74	Q96M11.1	PF15311	HYLS1_C	89	10735.3	9.94	12	20	1514	22585	22460	72.33	73.37	-1.088	4
P18858.1	PF04679	DNA_ligase_A_C	112	12554.2	5.12	19	14	1763	17085	16960	44.8	92.32	-0.327	1	1.74	Q96M11.1	PF15311	HYLS1_C	89	10735.3	9.94	12	20	1514	22585	22460	72.33	73.37	-1.088	4
Q7Z591	PF12443	AKNA	98	10772	5.27	16	10	1493	3105	2980	70.06	66.94	-0.915	1	1.74	Q8IXM3	PF09809	MRP-L27	115	12890.7	9.22	16	19	1816	15470	0	28.24	59.39	-0.624	5
P26368.4	PF00076	RRM_1	75	8304.47	4.29	8	4	1157	1490	0	31.45	82	0.061	1	1.74	P82664	PF00338	Ribosomal_S10	97	11277.1	6.94	13	13	1607	10430	10430	24.48	104.43	-0.206	5
Q01538.2	PF01530	zf-C2HC	29	3034.45	9.61	0	4	415	1615	1490	102.71	40.34	-0.666	1	1.74	P48147.2	PF02897	Peptidase_S9_N	417	48228.2	4.86	67	44	6676	84855	84230	42.79	75.68	-0.494	4
Q01538.2	PF08474	MYT1	57	6396.35	9.58	5	9	902	2980	2980	37.9	56.67	-0.484	1	1.74	P48147.2	PF02897	Peptidase_S9_N	417	48228.2	4.86	67	44	6676	84855	84230	42.79	75.68	-0.494	4
Q01538.2	PF01530	zf-C2HC	29	3034.45	9.61	0	4	415	1615	1490	102.71	40.34	-0.666	1	1.74	P48147.2	PF00326	Peptidase_S9	226	24980.7	8.01	22	23	3498	30285	29910	33.24	88.89	-0.127	4
Q01538.2	PF08474	MYT1	57	6396.35	9.58	5	9	902	2980	2980	37.9	56.67	-0.484	1	1.74	P48147.2	PF00326	Peptidase_S9	226	24980.7	8.01	22	23	3498	30285	29910	33.24	88.89	-0.127	4
Q9UPV9.1	PF04849	HAP1_N	306	35500.7	4.75	67	39	4972	19160	18910	65.34	89.61	-0.807	4	1.74	Q9NP92	PF07147	PDCD9	429	49165.4	8.41	48	52	6903	64455	63830	53.54	84.66	-0.324	5
Q9UPV9.1	PF12448	Milton	160	17685.6	6.21	21	20	2454	4470	4470	77.2	62.19	-0.766	1	1.74	Q9NP92	PF07147	PDCD9	429	49165.4	8.41	48	52	6903	64455	63830	53.54	84.66	-0.324	5
Q16576.1	PF12265	CAF1C_H4-bd	70	8263.47	6.19	8	6	1165	26470	0	42.26	94.57	-0.406	1	1.74	O76031.2	PF07724	AAA_2	220	23822.2	5.72	29	26	3392	4595	4470	39.75	103.68	-0.161	5
Q16576.1	PF00400	WD40	40	4495.93	5.75	5	3	609	12615	12490	22.34	78	-0.685	1	1.74	O76031.2	PF07724	AAA_2	220	23822.2	5.72	29	26	3392	4595	4470	39.75	103.68	-0.161	5
Q16576.1	PF12265	CAF1C_H4-bd	70	8263.47	6.19	8	6	1165	26470	0	42.26	94.57	-0.406	1	1.74	O76031.2	PF10431	ClpB_D2-small	85	9601.23	4.78	15	11	1376	1615	1490	22.25	113.53	-0.029	5
Q16576.1	PF00400	WD40	40	4495.93	5.75	5	3	609	12615	12490	22.34	78	-0.685	1	1.74	O76031.2	PF10431	ClpB_D2-small	85	9601.23	4.78	15	11	1376	1615	1490	22.25	113.53	-0.029	5
Q53GS9.2	PF02148	zf-UBP	64	7317.45	7.9	3	4	1019	7700	7450	42.33	103.59	0.252	1	1.74	Q6P2Q9.2	PF08082	PRO8NT	152	18414.2	5.23	29	21	2573	36440	0	73.07	82.04	-0.624	1
Q53GS9.2	PF02148	zf-UBP	64	7317.45	7.9	3	4	1019	7700	7450	42.33	103.59	0.252	1	1.74	Q6P2Q9.2	PF08083	PROCN	407	48031.3	10.32	28	75	6835	96175	95800	30.45	85.53	-0.505	1
Q53GS9.2	PF02148	zf-UBP	64	7317.45	7.9	3	4	1019	7700	7450	42.33	103.59	0.252	1	1.74	Q6P2Q9.2	PF10598	RRM_4	92	10543.2	5.8	9	7	1490	7450	0	29.25	113.37	0.097	1
Q53GS9.2	PF02148	zf-UBP	64	7317.45	7.9	3	4	1019	7700	7450	42.33	103.59	0.252	1	1.74	Q6P2Q9.2	PF10597	U5_2-snRNA_bdg	134	15416	9.64	12	18	2187	19605	19480	46.05	90.82	-0.234	1
Q53GS9.2	PF02148	zf-UBP	64	7317.45	7.9	3	4	1019	7700	7450	42.33	103.59	0.252	1	1.74	Q6P2Q9.2	PF10596	U6-snRNA_bdg	159	18971.9	9.44	13	18	2664	55460	55460	23.42	82.14	-0.403	1
Q53GS9.2	PF02148	zf-UBP	64	7317.45	7.9	3	4	1019	7700	7450	42.33	103.59	0.252	1	1.74	Q6P2Q9.2	PF12134	PRP8_domainIV	220	25334.7	8.07	25	26	3556	37470	37470	33.13	115.64	0.018	1
Q53GS9.2	PF02148	zf-UBP	64	7317.45	7.9	3	4	1019	7700	7450	42.33	103.59	0.252	1	1.74	Q6P2Q9.2	PF01398	JAB	107	12117.9	6.19	10	8	1701	18575	18450	43.97	84.67	-0.443	1
Q53GS9.2	PF02148	zf-UBP	64	7317.45	7.9	3	4	1019	7700	7450	42.33	103.59	0.252	1	1.74	Q6P2Q9.2	PF08084	PROCT	122	14202	6.2	13	11	1953	23045	22920	34.99	63.93	-0.566	1
Q53GS9.2	PF00443	UCH	328	38196.2	8.56	37	40	5424	42985	42860	39.46	92.1	-0.359	1	1.74	Q6P2Q9.2	PF08082	PRO8NT	152	18414.2	5.23	29	21	2573	36440	0	73.07	82.04	-0.624	1
Q53GS9.2	PF00443	UCH	328	38196.2	8.56	37	40	5424	42985	42860	39.46	92.1	-0.359	1	1.74	Q6P2Q9.2	PF08083	PROCN	407	48031.3	10.32	28	75	6835	96175	95800	30.45	85.53	-0.505	1
Q53GS9.2	PF00443	UCH	328	38196.2	8.56	37	40	5424	42985	42860	39.46	92.1	-0.359	1	1.74	Q6P2Q9.2	PF10598	RRM_4	92	10543.2	5.8	9	7	1490	7450	0	29.25	113.37	0.097	1
Q53GS9.2	PF00443	UCH	328	38196.2	8.56	37	40	5424	42985	42860	39.46	92.1	-0.359	1	1.74	Q6P2Q9.2	PF10597	U5_2-snRNA_bdg	134	15416	9.64	12	18	2187	19605	19480	46.05	90.82	-0.234	1
Q53GS9.2	PF00443	UCH	328	38196.2	8.56	37	40	5424	42985	42860	39.46	92.1	-0.359	1	1.74	Q6P2Q9.2	PF10596	U6-snRNA_bdg	159	18971.9	9.44	13	18	2664	55460	55460	23.42	82.14	-0.403	1
Q53GS9.2	PF00443	UCH	328	38196.2	8.56	37	40	5424	42985	42860	39.46	92.1	-0.359	1	1.74	Q6P2Q9.2	PF12134	PRP8_domainIV	220	25334.7	8.07	25	26	3556	37470	37470	33.13	115.64	0.018	1
Q53GS9.2	PF00443	UCH	328	38196.2	8.56	37	40	5424	42985	42860	39.46	92.1	-0.359	1	1.74	Q6P2Q9.2	PF01398	JAB	107	12117.9	6.19	10	8	1701	18575	18450	43.97	84.67	-0.443	1
Q53GS9.2	PF00443	UCH	328	38196.2	8.56	37	40	5424	42985	42860	39.46	92.1	-0.359	1	1.74	Q6P2Q9.2	PF08084	PROCT	122	14202	6.2	13	11	1953	23045	22920	34.99	63.93	-0.566	1
P29083.2	PF02002	TFIIE_alpha	108	12956	9.69	15	23	841	9065	8940	42.88	92.04	-0.613	1	1.74	P49675.2	PF01852	START	205	22812.3	7.89	26	27	3224	23615	23490	33.64	86.98	-0.373	5
P29083.2	PF08271	TF_Zn_Ribbon	50	5679.4	4.6	9	5	769	250	0	59.63	41	-0.438	1	1.74	P49675.2	PF01852	START	205	22812.3	7.89	26	27	3224	23615	23490	33.64	86.98	-0.373	5
P06280.1	PF16499	Melibiase_2	283	32572.8	4.65	39	23	4452	90005	89380	40.31	72.44	-0.37	8	1.74	Q08257.1	PF08240	ADH_N	92	9889.13	7.02	10	10	1389	8940	8940	27.91	80.54	-0.249	4
P06280.1	PF17450	Melibiase_2_C	87	9677.15	9.92	5	11	1365	21095	20970	53.79	82.99	-0.263	5	1.74	Q08257.1	PF08240	ADH_N	92	9889.13	7.02	10	10	1389	8940	8940	27.91	80.54	-0.249	4
P06280.1	PF16499	Melibiase_2	283	32572.8	4.65	39	23	4452	90005	89380	40.31	72.44	-0.37	8	1.74	Q08257.1	PF13602	ADH_zinc_N_2	136	14847.1	6.22	16	14	2110	11460	0	29.58	103.24	-0.07	4
P06280.1	PF17450	Melibiase_2_C	87	9677.15	9.92	5	11	1365	21095	20970	53.79	82.99	-0.263	5	1.74	Q08257.1	PF13602	ADH_zinc_N_2	136	14847.1	6.22	16	14	2110	11460	0	29.58	103.24	-0.07	4
Q5H9F3	PF15808	BCOR	247	28656.8	9.04	42	48	3970	24200	23950	85.49	50.97	-1.366	1	1.74	P82663	PF05047	L51_S25_CI-B8	52	6244.3	9.31	4	6	880	8480	0	40.67	74.81	-0.202	5
Q5H9F3	PF12796	Ank_2	95	10435.5	4.65	15	6	1436	15595	15470	41.29	92.42	-0.302	1	1.74	P82663	PF05047	L51_S25_CI-B8	52	6244.3	9.31	4	6	880	8480	0	40.67	74.81	-0.202	5
Q5H9F3	PF16553	PUFD	118	13533.4	4.97	17	13	1891	10095	9970	53.11	80.08	-0.338	1	1.74	P82663	PF05047	L51_S25_CI-B8	52	6244.3	9.31	4	6	880	8480	0	40.67	74.81	-0.202	5
O60508.1	PF00400	WD40	40	4534.42	9.59	2	6	649	11125	11000	27.26	102.25	0.062	1	1.74	O60477.2	PF01823	MACPF	154	18035.7	10.58	15	27	2549	14440	0	49.7	76.62	-0.636	4
Q5H9F3	PF15808	BCOR	247	28656.8	9.04	42	48	3970	24200	23950	85.49	50.97	-1.366	1	1.74	Q99819.2	PF02115	Rho_GDI	188	21120.3	5.75	27	23	2997	23045	22920	25.16	100.43	-0.198	4
Q5H9F3	PF12796	Ank_2	95	10435.5	4.65	15	6	1436	15595	15470	41.29	92.42	-0.302	1	1.74	Q99819.2	PF02115	Rho_GDI	188	21120.3	5.75	27	23	2997	23045	22920	25.16	100.43	-0.198	4
Q5H9F3	PF16553	PUFD	118	13533.4	4.97	17	13	1891	10095	9970	53.11	80.08	-0.338	1	1.74	Q99819.2	PF02115	Rho_GDI	188	21120.3	5.75	27	23	2997	23045	22920	25.16	100.43	-0.198	4
Q12996.1	PF05843	Suf	275	31372.7	8.96	34	40	4473	26610	26360	33.2	90.4	-0.185	1	1.74	Q9BPZ3.1	PF07145	PAM2	18	1940.27	9.7	1	3	283	0	0	15.34	91.67	-0.272	4
P15848	PF00884	Sulfatase	320	36168.4	8.52	30	33	5076	66725	66350	41.27	88.97	-0.28	8	1.74	P46783.1	PF03501	S10_plectin	96	11507.6	9.89	9	17	1638	19940	0	50.04	84.27	-0.565	4
P54803	PF02057	Glyco_hydro_59	295	33496	6.26	28	25	4662	102915	102790	40.67	84.31	-0.262	8	1.74	Q93088	PF02574	S-methyl_trans	292	32181.8	5.37	40	30	4508	31900	31400	39.13	85.86	-0.122	4
P54803	PF17387	Glyco_hydro_59M	117	13295.3	6.46	12	11	1885	16960	16960	38.96	94.1	-0.042	8	1.74	Q93088	PF02574	S-methyl_trans	292	32181.8	5.37	40	30	4508	31900	31400	39.13	85.86	-0.122	4
Q9P0K8	PF00250	Forkhead	86	10007.5	9.75	6	15	1398	27055	26930	45.02	62.44	-0.758	1	1.74	O00471.1	PF07393	Sec10	619	71476.1	6.61	82	78	10061	35270	34270	36.82	92.92	-0.332	4
P18858.1	PF04675	DNA_ligase_A_N	177	18908	9.91	16	22	2732	2980	2980	44.89	113.56	0.154	1	1.74	Q9UBR1	PF00795	CN_hydrolase	280	30946.1	6.43	27	24	4296	38430	37930	40.57	81.54	-0.164	4
P18858.1	PF01068	DNA_ligase_A_M	205	23704	5.58	34	30	3353	20065	19940	44.84	88.93	-0.465	1	1.74	Q9UBR1	PF00795	CN_hydrolase	280	30946.1	6.43	27	24	4296	38430	37930	40.57	81.54	-0.164	4
P18858.1	PF04679	DNA_ligase_A_C	112	12554.2	5.12	19	14	1763	17085	16960	44.8	92.32	-0.327	1	1.74	Q9UBR1	PF00795	CN_hydrolase	280	30946.1	6.43	27	24	4296	38430	37930	40.57	81.54	-0.164	4
P42695.2	PF12717	Cnd1	178	21217	9.07	19	26	3009	13325	12950	46.19	95.28	-0.05	1	1.74	P0C7P0	PF09360	zf-CDGSH	39	4396.22	9.82	2	8	625	7115	6990	50.22	72.31	-0.187	5
Q9UBX1.1	PF08246	Inhibitor_I29	58	6926.78	8.3	8	9	967	9970	0	26.81	65.52	-0.648	8	1.74	Q9BXL7	PF00619	CARD	87	10271.9	6.92	12	12	1451	14565	14440	38.74	95.17	-0.471	4
Q9UBX1.1	PF00112	Peptidase_C1	212	23378.4	6.1	21	19	3215	63285	62910	38.79	70.9	-0.32	8	1.74	Q9BXL7	PF00619	CARD	87	10271.9	6.92	12	12	1451	14565	14440	38.74	95.17	-0.471	4
O43913.1	PF13191	AAA_16	150	17220.8	5.49	18	13	2435	6210	5960	37.99	106.47	0.1	1	1.74	Q9NVV4	PF17797	RL	71	8401.46	7.02	8	8	1161	4595	4470	45.54	64.51	-0.632	9
O43913.1	PF14630	ORC5_C	255	29439.1	9.28	26	35	4200	33475	33350	34.57	99.06	-0.264	1	1.74	Q9NVV4	PF17797	RL	71	8401.46	7.02	8	8	1161	4595	4470	45.54	64.51	-0.632	9
O43913.1	PF13191	AAA_16	150	17220.8	5.49	18	13	2435	6210	5960	37.99	106.47	0.1	1	1.74	Q9NVV4	PF03828	PAP_assoc	49	5800.48	4.77	7	5	810	2980	0	42.8	73.67	-0.635	8
O43913.1	PF14630	ORC5_C	255	29439.1	9.28	26	35	4200	33475	33350	34.57	99.06	-0.264	1	1.74	Q9NVV4	PF03828	PAP_assoc	49	5800.48	4.77	7	5	810	2980	0	42.8	73.67	-0.635	8
P36954.1	PF02150	RNA_POL_M_15KD	38	4632.17	4.72	7	5	622	4720	4470	68.79	56.58	-1.089	1	1.74	P54098.1	PF18136	DNApol_Exo	294	33415.1	6.02	33	29	4678	72670	72420	48.42	82.96	-0.393	5
P36954.1	PF01096	TFIIS_C	41	4760.4	8.51	3	5	638	8730	8480	50.69	35.85	-0.649	1	1.74	P54098.1	PF18136	DNApol_Exo	294	33415.1	6.02	33	29	4678	72670	72420	48.42	82.96	-0.393	5
P36954.1	PF02150	RNA_POL_M_15KD	38	4632.17	4.72	7	5	622	4720	4470	68.79	56.58	-1.089	1	1.74	P54098.1	PF00476	DNA_pol_A	432	48539.5	8.45	49	52	6797	88265	87890	44.43	82.01	-0.279	5
P36954.1	PF01096	TFIIS_C	41	4760.4	8.51	3	5	638	8730	8480	50.69	35.85	-0.649	1	1.74	P54098.1	PF00476	DNA_pol_A	432	48539.5	8.45	49	52	6797	88265	87890	44.43	82.01	-0.279	5
Q14781.2	PF00385	Chromo	50	6015.05	9.8	6	11	863	17990	17990	61.48	89.8	-0.682	1	1.74	O60239.2	PF05276	SH3BP5	231	27021.8	9.28	41	47	3829	19940	0	44.75	76.54	-0.977	5
Q14781.2	PF17218	CBX7_C	33	3713.2	5.48	4	3	529	5500	0	48.15	94.24	-0.152	1	1.74	O60239.2	PF05276	SH3BP5	231	27021.8	9.28	41	47	3829	19940	0	44.75	76.54	-0.977	5
Q13029.3	PF00856	SET	101	11887.8	9.25	10	15	1676	43555	43430	40.05	79.11	-0.5	1	1.74	P54098.1	PF18136	DNApol_Exo	294	33415.1	6.02	33	29	4678	72670	72420	48.42	82.96	-0.393	5
Q13029.3	PF00096	zf-C2H2	23	2864.32	8.91	2	4	391	125	0	79.43	33.91	-1.139	1	1.74	P54098.1	PF18136	DNApol_Exo	294	33415.1	6.02	33	29	4678	72670	72420	48.42	82.96	-0.393	5
Q13029.3	PF13912	zf-C2H2_6	27	3419.02	10.96	1	8	476	1615	1490	37.89	35.93	-1.493	1	1.74	P54098.1	PF18136	DNApol_Exo	294	33415.1	6.02	33	29	4678	72670	72420	48.42	82.96	-0.393	5
P49917.2	PF04675	DNA_ligase_A_N	194	22430.2	9.72	21	32	3211	18575	18450	28.46	98.61	-0.338	1	1.74	P48147.2	PF02897	Peptidase_S9_N	417	48228.2	4.86	67	44	6676	84855	84230	42.79	75.68	-0.494	4
P49917.2	PF01068	DNA_ligase_A_M	204	23609.1	6.36	30	28	3305	19035	18910	43.19	75.54	-0.565	1	1.74	P48147.2	PF02897	Peptidase_S9_N	417	48228.2	4.86	67	44	6676	84855	84230	42.79	75.68	-0.494	4
P49917.2	PF04679	DNA_ligase_A_C	255	28555.2	8.49	33	37	4031	27430	26930	49.06	81.8	-0.393	1	1.74	P48147.2	PF02897	Peptidase_S9_N	417	48228.2	4.86	67	44	6676	84855	84230	42.79	75.68	-0.494	4
P49917.2	PF00533	BRCT	77	8614.82	4.72	11	7	1204	8605	8480	48.83	91.04	-0.136	1	1.74	P48147.2	PF02897	Peptidase_S9_N	417	48228.2	4.86	67	44	6676	84855	84230	42.79	75.68	-0.494	4
P49917.2	PF11411	DNA_ligase_IV	34	4047.42	4.65	7	4	551	4470	4470	0.44	57.35	-0.841	1	1.74	P48147.2	PF02897	Peptidase_S9_N	417	48228.2	4.86	67	44	6676	84855	84230	42.79	75.68	-0.494	4
P49917.2	PF04675	DNA_ligase_A_N	194	22430.2	9.72	21	32	3211	18575	18450	28.46	98.61	-0.338	1	1.74	P48147.2	PF00326	Peptidase_S9	226	24980.7	8.01	22	23	3498	30285	29910	33.24	88.89	-0.127	4
P49917.2	PF01068	DNA_ligase_A_M	204	23609.1	6.36	30	28	3305	19035	18910	43.19	75.54	-0.565	1	1.74	P48147.2	PF00326	Peptidase_S9	226	24980.7	8.01	22	23	3498	30285	29910	33.24	88.89	-0.127	4
P49917.2	PF04679	DNA_ligase_A_C	255	28555.2	8.49	33	37	4031	27430	26930	49.06	81.8	-0.393	1	1.74	P48147.2	PF00326	Peptidase_S9	226	24980.7	8.01	22	23	3498	30285	29910	33.24	88.89	-0.127	4
P49917.2	PF00533	BRCT	77	8614.82	4.72	11	7	1204	8605	8480	48.83	91.04	-0.136	1	1.74	P48147.2	PF00326	Peptidase_S9	226	24980.7	8.01	22	23	3498	30285	29910	33.24	88.89	-0.127	4
P49917.2	PF11411	DNA_ligase_IV	34	4047.42	4.65	7	4	551	4470	4470	0.44	57.35	-0.841	1	1.74	P48147.2	PF00326	Peptidase_S9	226	24980.7	8.01	22	23	3498	30285	29910	33.24	88.89	-0.127	4
Q9H5F2.1	PF06608	DUF1143	148	17556.6	8.69	12	16	2375	41285	40910	49.76	37.57	-0.98	1	1.74	P51970	PF06747	CHCH	36	4373.92	4.95	6	4	589	8730	8480	50.17	46.11	-0.675	5
O95766	PF08217	DUF1712	401	46911.9	6.05	55	49	6572	35215	34840	47.45	81.65	-0.396	8	1.74	P31350.1	PF00268	Ribonuc_red_sm	268	31402.3	5.31	41	31	4409	45170	44920	41.17	89.89	-0.053	4
O75132	PF02892	zf-BED	48	5491.37	9.16	4	8	753	8730	8480	49.08	58.96	-0.498	3	1.74	P54577.4	PF00579	tRNA-synt_1b	292	33042.3	6.45	42	40	4711	37485	37360	20.72	96.78	-0.232	4
O75132	PF05699	Dimer_Tnp_hAT	79	8949.42	5.58	9	7	1267	14105	13980	36.99	98.73	-0.013	9	1.74	P54577.4	PF00579	tRNA-synt_1b	292	33042.3	6.45	42	40	4711	37485	37360	20.72	96.78	-0.232	4
O75132	PF02892	zf-BED	48	5491.37	9.16	4	8	753	8730	8480	49.08	58.96	-0.498	3	1.74	P54577.4	PF01588	tRNA_bind	97	10569.2	5.11	15	11	1507	1615	1490	32.39	104.33	-0.161	4
O75132	PF05699	Dimer_Tnp_hAT	79	8949.42	5.58	9	7	1267	14105	13980	36.99	98.73	-0.013	9	1.74	P54577.4	PF01588	tRNA_bind	97	10569.2	5.11	15	11	1507	1615	1490	32.39	104.33	-0.161	4
Q5U623.2	PF16788	ATF7IP_BD	210	23592.8	9.04	26	31	3335	4595	4470	44.29	84	-0.733	1	1.74	P82930.2	PF16053	MRP-S34	127	14813.9	6.59	18	17	2079	33460	33460	48.6	79.92	-0.609	5
Q5U623.2	PF16794	fn3_4	100	11526.6	9.66	6	15	1644	17210	16960	51.19	86.8	-0.254	1	1.74	P82930.2	PF16053	MRP-S34	127	14813.9	6.59	18	17	2079	33460	33460	48.6	79.92	-0.609	5
Q9UGU0.3	PF13771	zf-HC5HC2H	79	8939.28	6.54	9	8	1217	13450	12950	36.49	75.44	-0.199	1	1.74	Q9BXL7	PF00619	CARD	87	10217.9	6.92	12	12	1451	14565	14440	38.74	95.17	-0.471	4
Q13416.2	PF04084	ORC2	311	36043.3	7.15	33	33	5108	43890	43890	47.31	102.48	-0.279	1	1.74	Q9Y6K8.2	PF00406	ADK	158	17715.4	9.42	18	24	2531	10095	9970	29.63	90.76	-0.429	4
P54803	PF02057	Glyco_hydro_59	295	33496	6.26	28	25	4662	102915	102790	40.67	84.31	-0.262	8	1.74	Q9H5Q4.1	PF00398	RrnaAD	309	35574.7	9.23	34	43	5069	35660	35410	45.15	95.92	-0.238	5
P54803	PF02057	Glyco_hydro_59	295	33496	6.26	28	25	4662	102915	102790	40.67	84.31	-0.262	8	1.74	Q9H5Q4.1	PF00398	RrnaAD	309	35574.7	9.23	34	43	5069	35660	35410	45.15	95.92	-0.238	5
P12004.1	PF00705	PCNA_N	125	13947.9	4.47	21	12	1951	8605	8480	41.89	99.84	-0.126	5	1.74	Q9H5Q4.1	PF00398	RrnaAD	309	35574.7	9.23	34	43	5069	35660	35410	45.15	95.92	-0.238	5
P12004.1	PF02747	PCNA_C	127	13909	5.12	16	12	1957	7575	7450	44.57	90.55	-0.013	1	1.74	Q9H5Q4.1	PF00398	RrnaAD	309	35574.7	9.23	34	43	5069	35660	35410	45.15	95.92	-0.238	5
Q9UBU7.1	PF07535	zf-DBF	44	5232.89	6.06	7	6	723	4595	4470	36.06	75.23	-0.877	1	1.74	Q14914	PF16884	ADH_N_2	101	11169	8.9	12	14	1602	13980	0	9.01	90.69	-0.256	4
Q9UBU7.1	PF07535	zf-DBF	44	5232.89	6.06	7	6	723	4595	4470	36.06	75.23	-0.877	1	1.74	Q14914	PF00107	ADH_zinc_N	141	15525	8.42	16	18	2203	21555	21430	24.11	89.79	-0.099	10
O00462	PF02836	Glyco_hydro_2_C	242	28139.6	4.7	30	19	3882	75985	75860	38.57	74.92	-0.26	8	1.74	P59103.2	PF15199	DAOA	82	9783.02	7.74	10	11	1342	18575	18450	63.28	54.76	-0.96	9
O00462	PF17786	Mannosidase_ig	96	10962.4	5.46	12	8	1506	14960	14440	56.67	76.98	-0.173	8	1.74	P59103.2	PF15199	DAOA	82	9783.02	7.74	10	11	1342	18575	18450	63.28	54.76	-0.96	9
O00462	PF17753	Ig_mannosidase	80	9013.25	4.45	10	5	1266	12490	12490	38.25	91.38	0.101	8	1.74	P59103.2	PF15199	DAOA	82	9783.02	7.74	10	11	1342	18575	18450	63.28	54.76	-0.96	9
O60508.1	PF00400	WD40	40	4534.42	9.59	2	6	649	11125	11000	27.26	102.25	0.062	1	1.74	P49675.2	PF01852	START	206	22913.5	7.89	26	27	3238	23615	23490	31.65	86.55	-0.374	5
P10071	PF00096	zf-C2H2	28	3565.26	9.84	2	6	496	7115	6990	84.73	62.5	-0.514	1	1.74	P07195.2	PF00056	Ldh_1_N	140	15273	8.59	13	15	2209	10095	9970	18.1	123.71	0.322	4
P10071	PF00096	zf-C2H2	28	3565.26	9.84	2	6	496	7115	6990	84.73	62.5	-0.514	1	1.74	P07195.2	PF02866	Ldh_1_C	171	19002.8	5.34	23	17	2671	33585	33460	29.35	99.71	-0.146	4
P18858.1	PF04675	DNA_ligase_A_N	177	18908	9.91	16	22	2732	2980	2980	44.89	113.56	0.154	1	1.74	Q8N3C0.3	PF00270	DEAD	180	20302.7	7.1	20	20	2912	11460	11460	29.53	113.67	0.051	1
P18858.1	PF01068	DNA_ligase_A_M	205	23704	5.58	34	30	3353	20065	19940	44.84	88.93	-0.465	1	1.74	Q8N3C0.3	PF00270	DEAD	180	20302.7	7.1	20	20	2912	11460	11460	29.53	113.67	0.051	1
P18858.1	PF04679	DNA_ligase_A_C	112	12554.2	5.12	19	14	1763	17085	16960	44.8	92.32	-0.327	1	1.74	Q8N3C0.3	PF00270	DEAD	180	20302.7	7.1	20	20	2912	11460	11460	29.53	113.67	0.051	1
P18858.1	PF04675	DNA_ligase_A_N	177	18908	9.91	16	22	2732	2980	2980	44.89	113.56	0.154	1	1.74	Q8N3C0.3	PF00271	Helicase_C	159	17866.7	9.67	12	19	2519	10095	9970	40.31	91.32	-0.099	4
P18858.1	PF01068	DNA_ligase_A_M	205	23704	5.58	34	30	3353	20065	19940	44.84	88.93	-0.465	1	1.74	Q8N3C0.3	PF00271	Helicase_C	159	17866.7	9.67	12	19	2519	10095	9970	40.31	91.32	-0.099	4
P18858.1	PF04679	DNA_ligase_A_C	112	12554.2	5.12	19	14	1763	17085	16960	44.8	92.32	-0.327	1	1.74	Q8N3C0.3	PF00271	Helicase_C	159	17866.7	9.67	12	19	2519	10095	9970	40.31	91.32	-0.099	4
P18858.1	PF04675	DNA_ligase_A_N	177	18908	9.91	16	22	2732	2980	2980	44.89	113.56	0.154	1	1.74	Q8N3C0.3	PF02889	Sec63	309	35744.1	5.95	40	34	5062	62005	61880	44.42	101.59	-0.156	1
P18858.1	PF01068	DNA_ligase_A_M	205	23704	5.58	34	30	3353	20065	19940	44.84	88.93	-0.465	1	1.74	Q8N3C0.3	PF02889	Sec63	309	35744.1	5.95	40	34	5062	62005	61880	44.42	101.59	-0.156	1
P18858.1	PF04679	DNA_ligase_A_C	112	12554.2	5.12	19	14	1763	17085	16960	44.8	92.32	-0.327	1	1.74	Q8N3C0.3	PF02889	Sec63	309	35744.1	5.95	40	34	5062	62005	61880	44.42	101.59	-0.156	1
Q13416.2	PF04084	ORC2	310	35930.1	7.15	33	33	5089	43890	43890	46.81	101.55	-0.293	1	1.74	Q8N1V2.3	PF00400	WD40	44	4847.45	5.45	4	3	671	6990	6990	41.87	82.05	-0.075	4
O43148.1	PF03291	Pox_MCEL	340	39844.6	7.66	51	52	5573	43820	43320	47.67	73.38	-0.582	1	1.74	P07741.2	PF00156	Pribosyltran	149	15965.6	6.93	17	17	2293	10095	9970	33.37	113.29	0.191	4
P22304	PF00884	Sulfatase	379	42417	5.35	42	30	5928	54570	54320	41.02	84.38	-0.248	3	1.74	Q9UN86.2	PF02136	NTF2	123	14030.8	8.73	11	13	1945	11920	11920	39.73	72.76	-0.458	4
P22304	PF00884	Sulfatase	379	42417	5.35	42	30	5928	54570	54320	41.02	84.38	-0.248	3	1.74	Q9UN86.2	PF00076	RRM_1	65	7396.59	5.16	9	7	1051	0	0	28.88	98.77	0.105	4
P18858.1	PF04675	DNA_ligase_A_N	177	18908	9.91	16	22	2732	2980	2980	44.89	113.56	0.154	1	1.74	P48147.2	PF02897	Peptidase_S9_N	417	48228.2	4.86	67	44	6676	84855	84230	42.79	75.68	-0.494	4
P18858.1	PF01068	DNA_ligase_A_M	205	23704	5.58	34	30	3353	20065	19940	44.84	88.93	-0.465	1	1.74	P48147.2	PF02897	Peptidase_S9_N	417	48228.2	4.86	67	44	6676	84855	84230	42.79	75.68	-0.494	4
P18858.1	PF04679	DNA_ligase_A_C	112	12554.2	5.12	19	14	1763	17085	16960	44.8	92.32	-0.327	1	1.74	P48147.2	PF02897	Peptidase_S9_N	417	48228.2	4.86	67	44	6676	84855	84230	42.79	75.68	-0.494	4
P18858.1	PF04675	DNA_ligase_A_N	177	18908	9.91	16	22	2732	2980	2980	44.89	113.56	0.154	1	1.74	P48147.2	PF00326	Peptidase_S9	226	24980.7	8.01	22	23	3498	30285	29910	33.24	88.89	-0.127	4
P18858.1	PF01068	DNA_ligase_A_M	205	23704	5.58	34	30	3353	20065	19940	44.84	88.93	-0.465	1	1.74	P48147.2	PF00326	Peptidase_S9	226	24980.7	8.01	22	23	3498	30285	29910	33.24	88.89	-0.127	4
P18858.1	PF04679	DNA_ligase_A_C	112	12554.2	5.12	19	14	1763	17085	16960	44.8	92.32	-0.327	1	1.74	P48147.2	PF00326	Peptidase_S9	226	24980.7	8.01	22	23	3498	30285	29910	33.24	88.89	-0.127	4
O43913.1	PF13191	AAA_16	150	17220.8	5.49	18	13	2435	6210	5960	37.99	106.47	0.1	1	1.74	Q93088	PF02574	S-methyl_trans	292	32181.8	5.37	40	30	4508	31900	31400	39.13	85.86	-0.122	4
O43913.1	PF14630	ORC5_C	255	29439.1	9.28	26	35	4200	33475	33350	34.57	99.06	-0.264	1	1.74	Q93088	PF02574	S-methyl_trans	292	32181.8	5.37	40	30	4508	31900	31400	39.13	85.86	-0.122	4
O75506.1	PF06825	HSBP1	51	5786.51	4.04	9	4	805	0	0	54.07	91.76	-0.445	1	1.74	Q01581	PF01154	HMG_CoA_synt_N	174	18690	4.29	23	12	2594	28670	28420	29.67	87.99	-0.06	4
O75506.1	PF06825	HSBP1	51	5786.51	4.04	9	4	805	0	0	54.07	91.76	-0.445	1	1.74	Q01581	PF08540	HMG_CoA_synt_C	283	32190.5	8.18	33	35	4488	36580	36330	20.72	78.59	-0.406	5
Q5MJ70.2	PF11357	Spy1	141	17170	7.14	21	21	2404	36815	36440	34.48	83.76	-0.237	1	1.74	P54098.1	PF18136	DNApol_Exo	294	33415.1	6.02	33	29	4678	72670	72420	48.42	82.96	-0.393	5
Q5MJ70.2	PF11357	Spy1	141	17170	7.14	21	21	2404	36815	36440	34.48	83.76	-0.237	1	1.74	P54098.1	PF00476	DNA_pol_A	432	48539.5	8.45	49	52	6797	88265	87890	44.43	82.01	-0.279	5
P18074.1	PF06733	DEAD_2	185	21315.5	7.21	24	24	3000	22265	21890	52.23	95.35	-0.275	1	1.74	O95379.1	PF05527	DUF758	181	21132.4	9.05	22	27	2997	7575	7450	18.21	93.7	-0.418	4
P18074.1	PF06777	HBB	145	16604.2	8.71	19	21	2375	10095	9970	45.13	106.97	-0.186	1	1.74	O95379.1	PF05527	DUF758	181	21132.4	9.05	22	27	2997	7575	7450	18.21	93.7	-0.418	4
P18074.1	PF13307	Helicase_C_2	177	20311.2	7.95	22	23	2848	24535	24410	35.19	85.42	-0.249	1	1.74	O95379.1	PF05527	DUF758	181	21132.4	9.05	22	27	2997	7575	7450	18.21	93.7	-0.418	4
P0DN76.1	PF00642	zf-CCCH	27	3183.68	9.65	2	7	438	1615	1490	43.94	43.33	-0.956	1	1.74	Q9UDX5	PF10558	MTP18	58	6381.21	6.32	7	7	899	18450	0	16.51	94.14	-0.028	5
P0DN76.1	PF00076	RRM_1	59	6986.69	4.41	15	6	952	8480	8480	56.59	70.85	-0.812	1	1.74	Q9UDX5	PF10558	MTP18	58	6381.21	6.32	7	7	899	18450	0	16.51	94.14	-0.028	5
Q8TDY2.3	PF10377	ATG11	134	15450.9	9.79	15	23	2205	11460	11460	51.42	90.9	-0.454	5	1.74	Q8N4X5.1	PF00169	PH	103	11965.1	9.68	11	19	1717	23615	23490	41.29	103.11	-0.418	4
Q9BWT1	PF10497	zf-4CXXC_R1	99	11302.9	8.92	7	14	1529	19200	18450	22.83	54.14	-0.616	3	1.74	O14618.1	PF00403	HMA	58	6310.15	4.54	8	3	880	125	0	41.97	97.24	-0.002	3
Q9BWT1	PF10497	zf-4CXXC_R1	99	11302.9	8.92	7	14	1529	19200	18450	22.83	54.14	-0.616	3	1.74	O14618.1	PF00080	Sod_Cu	138	14731.3	5.06	21	12	2027	7240	6990	24.16	83.33	-0.493	4
Q96AV8	PF02319	E2F_TDP	69	7876.12	9.52	6	10	1129	11460	11460	44.95	107.25	-0.201	1	1.74	Q08257.1	PF02319	E2F_TDP	92	9889.13	7.02	10	10	1389	8940	8940	27.91	80.54	-0.249	4
Q96AV8	PF02319	E2F_TDP	69	7876.12	9.52	6	10	1129	11460	11460	44.95	107.25	-0.201	1	1.74	Q08257.1	PF13602	ADH_zinc_N_2	136	14847.1	6.22	16	14	2110	11460	0	29.58	103.24	-0.07	4
P04066	PF01120	Alpha_L_fucos	344	40251.1	5.75	43	34	5535	139590	139340	39.88	64.59	-0.592	8	1.74	P07741.2	PF00156	Pribosyltran	149	15956.6	6.93	17	17	2293	10095	9970	33.37	113.29	0.191	4
P04066	PF16757	Fucosidase_C	86	9565.95	5.64	7	6	1355	30480	0	22.23	87.33	-0.107	8	1.74	P07741.2	PF00156	Pribosyltran	149	15956.6	6.93	17	17	2293	10095	9970	33.37	113.29	0.191	4
Q9UBU8.2	PF11717	Tudor-knot	43	5088.97	9.3	4	8	721	10095	9970	27.4	76.98	-0.412	1	1.74	P30838	PF00171	Aldedh	428	47534.6	5.81	51	44	6705	47705	47330	46.6	92.27	-0.17	4
Q9UBU8.2	PF05712	MRG	179	20806.9	6.38	26	25	2951	28880	0	28.74	94.25	-0.423	1	1.74	P30838	PF00171	Aldedh	428	47534.6	5.81	51	44	6705	47705	47330	46.6	92.27	-0.17	4
O00267.1	PF11942	Spt5_N	98	11410.1	3.86	32	9	1549	18450	0	67.44	75.61	-1.109	1	1.74	Q9BU02	PF01928	CYTH	188	20566.3	4.64	33	18	2898	24075	23950	47.77	95.48	-0.199	4
O00267.1	PF03439	Spt5-NGN	87	10028.7	9.1	8	11	1429	18450	18450	24.76	95.17	-0.17	1	1.74	Q9BU02	PF01928	CYTH	188	20566.3	4.64	33	18	2898	24075	23950	47.77	95.48	-0.199	4
O00267.1	PF00467	KOW	32	3564.07	4.58	6	3	503	0	0	7.64	109.38	0.328	1	1.74	Q9BU02	PF01928	CYTH	188	20566.3	4.64	33	18	2898	24075	23950	47.77	95.48	-0.199	4
Q9Y675	PF07192	SNURF	69	8224.24	10.58	9	13	1156	1490	1490	88.55	70.58	-1.135	1	1.74	P13798.4	PF00326	Peptidase_S9	217	24193	5.76	22	17	3386	32680	32430	46.94	92.49	0.067	4
Q9HAN9.1	PF01467	CTP_transf_like	218	24946.6	9.26	26	34	3527	47690	47440	38.92	84.08	-0.567	1	1.74	Q92844.2	PF12845	TBD	55	6384.32	6.3	9	8	893	5625	5500	47.12	74.55	-0.698	4
P12956.2	PF03731	Ku_N	220	25228.7	5.78	35	31	3541	13075	12950	45.42	85.55	-0.426	1	1.74	P54687.3	PF01063	Aminotran_4	251	28123.2	4.92	31	23	3935	46785	46410	34.01	87.73	-0.109	4
P12956.2	PF02735	Ku	202	23080.1	9.21	24	30	3324	10555	10430	55.55	95.99	-0.263	1	1.74	P54687.3	PF01063	Aminotran_4	251	28123.2	4.92	31	23	3935	46785	46410	34.01	87.73	-0.109	4
P12956.2	PF03730	Ku_C	86	9856.12	5.65	15	13	1385	4470	0	41.96	73.6	-0.891	1	1.74	P54687.3	PF01063	Aminotran_4	251	28123.2	4.92	31	23	3935	46785	46410	34.01	87.73	-0.109	4
P12956.2	PF02037	SAP	35	3949.77	9.66	3	7	576	1490	1490	22.79	94.86	-0.149	1	1.74	P54687.3	PF01063	Aminotran_4	251	28123.2	4.92	31	23	3935	46785	46410	34.01	87.73	-0.109	4
Q9Y5N6.1	PF05460	ORC6	91	10096.9	8.94	9	13	1437	10220	9970	52.66	104.07	0.045	1	1.74	Q06278	PF00111	Fer2	71	7908.44	9.77	3	12	1124	6210	5960	55.16	86.48	-0.154	4
Q9Y5N6.1	PF05460	ORC6	91	10096.9	8.94	9	13	1437	10220	9970	52.66	104.07	0.045	1	1.74	Q06278	PF01799	Fer2_2	75	8198.47	7.59	6	7	1136	3355	2980	40.5	78	-0.185	4
Q9Y5N6.1	PF05460	ORC6	91	10096.9	8.94	9	13	1437	10220	9970	52.66	104.07	0.045	1	1.74	Q06278	PF00941	FAD_binding_5	185	20397.8	7.94	17	18	2913	11585	11460	41.34	104.81	-0.011	4
Q9Y5N6.1	PF05460	ORC6	91	10096.9	8.94	9	13	1437	10220	9970	52.66	104.07	0.045	1	1.74	Q06278	PF03450	CO_deh_flav_C	105	11625.6	8.82	9	12	1648	8730	8480	30.65	102.19	0.2	4
Q9Y5N6.1	PF05460	ORC6	91	10096.9	8.94	9	13	1437	10220	9970	52.66	104.07	0.045	1	1.74	Q06278	PF01315	Ald_Xan_dh_C	108	11895.7	4.52	17	9	1670	3230	2980	26.52	100.19	0.316	4
Q9Y5N6.1	PF05460	ORC6	91	10096.9	8.94	9	13	1437	10220	9970	52.66	104.07	0.045	1	1.74	Q06278	PF02738	Ald_Xan_dh_C2	539	59630.5	6.27	62	57	8336	63550	62800	43.03	83.41	-0.19	4
Q9UBU7.1	PF07535	zf-DBF	44	5232.89	6.06	7	6	723	4595	4470	36.06	75.23	-0.877	1	1.74	P06132.2	PF01208	URO-D	347	38590.1	5.77	41	34	5429	44265	43890	48.53	90	-0.096	4
Q6ZYL4.1	PF06331	Tfb5	69	7797.09	4.33	11	5	1110	1490	1490	35.42	124.2	0.345	1	1.74	O75534.2	PF00313	CSD	65	7378.4	6.85	9	9	1041	3105	2980	23.04	89.85	-0.303	4
Q6ZYL4.1	PF06331	Tfb5	69	7797.09	4.33	11	5	1110	1490	1490	35.42	124.2	0.345	1	1.74	O75534.2	PF12901	SUZ-C	32	3470.97	6.16	4	4	487	0	0	32.47	79.38	-0.447	4
Q86UU0.1	PF11502	BCL9	88	9073.02	5.58	10	8	1272	0	0	57.51	68.86	-0.752	1	1.74	P54687.3	PF01063	Aminotran_4	251	28123.2	4.92	31	23	3935	46785	46410	34.01	87.73	-0.109	4
Q8N9N5	PF10523	BEN	70	8205.51	9.47	6	11	1159	17085	16960	35.71	85	-0.411	1	1.74	O75880	PF02630	SCO1-SenC	137	15595.5	4.35	27	12	2174	17545	17420	26.02	84.6	-0.363	5
Q9BQ83	PF01541	GIY-YIG	83	9573.01	11.6	2	13	1339	27960	27960	26.22	68.07	-0.373	1	1.74	P07741.2	PF00156	Pribosyltran	149	15956.6	6.93	17	17	2293	10095	9970	33.37	113.29	0.191	4
Q9UL03	PF13519	VWA_2	129	14399.4	6.12	14	13	2027	11460	0	34	87.83	-0.226	1	1.74	P53396.3	PF16114	Citrate_bind	178	19147.8	6.23	19	17	2693	18910	18910	18.65	87.7	-0.129	4
Q9UL03	PF13519	VWA_2	129	14399.4	6.12	14	13	2027	11460	0	34	87.83	-0.226	1	1.74	P53396.3	PF02629	CoA_binding	107	12260.1	6.87	12	12	1706	18450	18450	39.45	75.7	-0.196	4
Q9UL03	PF13519	VWA_2	129	14399.4	6.12	14	13	2027	11460	0	34	87.83	-0.226	1	1.74	P53396.3	PF00549	Ligase_CoA	116	12420.2	6.12	12	11	1730	11710	11460	27.33	80.69	-0.005	4
Q9UL03	PF13519	VWA_2	129	14399.4	6.12	14	13	2027	11460	0	34	87.83	-0.226	1	1.74	P53396.3	PF00285	Citrate_synt	207	22879.8	9.14	21	27	3246	9190	8940	29.22	95.65	-0.013	4
Q9UL03	PF15300	INT_SG_DDX_CT_C	63	7584.02	10.28	7	14	1106	1490	0	34.4	103.65	-0.563	1	1.74	P53396.3	PF16114	Citrate_bind	178	19147.8	6.23	19	17	2693	18910	18910	18.65	87.7	-0.129	4
Q9UL03	PF15300	INT_SG_DDX_CT_C	63	7584.02	10.28	7	14	1106	1490	0	34.4	103.65	-0.563	1	1.74	P53396.3	PF02629	CoA_binding	107	12260.1	6.87	12	12	1706	18450	18450	39.45	75.7	-0.196	4
Q9UL03	PF15300	INT_SG_DDX_CT_C	63	7584.02	10.28	7	14	1106	1490	0	34.4	103.65	-0.563	1	1.74	P53396.3	PF00549	Ligase_CoA	116	12420.2	6.12	12	11	1730	11710	11460	27.33	80.69	-0.005	4
Q9UL03	PF15300	INT_SG_DDX_CT_C	63	7584.02	10.28	7	14	1106	1490	0	34.4	103.65	-0.563	1	1.74	P53396.3	PF00285	Citrate_synt	207	22879.8	9.14	21	27	3246	9190	8940	29.22	95.65	-0.013	4
Q9C002	PF06522	B12D	68	7793.1	8.27	8	9	1123	17990	0	44.71	98.82	-0.238	1	1.74	P82930.2	PF16053	MRP-S34	127	14813.9	6.59	18	17	2079	33460	33460	48.6	79.92	-0.609	5
Q9HAN9.1	PF01467	CTP_transf_like	218	24946.6	9.26	26	34	3527	47690	47440	38.92	84.08	-0.567	5	1.74	Q9P032	PF06784	UPF0240	171	19781.9	7.8	26	27	2822	11460	11460	30.59	90.06	-0.518	5
Q9NPI8.1	PF11107	FANCF	354	40183	7.81	40	41	5679	58690	58440	59.33	97.29	-0.327	1	1.74	O14713.1	PF10480	ICAP-1_inte_bdg	200	21782.5	5.95	25	23	3049	17670	17420	43.27	81.4	-0.38	5
Q8WYQ5.1	PF00035	dsrm	65	7179.25	8.07	7	8	1013	4595	4470	41.12	84	-0.123	3	1.74	Q9HAV4.1	PF08389	Xpo1	163	18798.6	4.97	22	15	2655	19730	19480	53.41	105.28	-0.21	2
P30291.2	PF00069	Pkinase	271	30482.7	5.95	37	30	4269	28670	28420	38.07	90.33	-0.29	1	1.74	Q9H9P8	PF01266	DAO	407	44614.5	6.73	45	44	6314	32945	32320	33.24	97.74	-0.025	5
Q16656.1	PF10491	Nrf1_DNA-bind	209	23575.2	9.71	22	33	3348	35075	34950	44.15	79.81	-0.517	1	1.74	Q96Q11	PF01743	PolyA_pol	124	14184.9	5.6	20	17	1977	8480	0	22.57	71.61	-0.62	5
Q16656.1	PF10492	Nrf1_activ_bdg	55	5702.51	3.92	4	1	805	1490	0	22.3	102.55	0.358	1	1.74	Q96Q11	PF01743	PolyA_pol	124	14184.9	5.6	20	17	1977	8480	0	22.57	71.61	-0.62	5
Q16656.1	PF10491	Nrf1_DNA-bind	209	23575.2	9.71	22	33	3348	35075	34950	44.15	79.81	-0.517	1	1.74	Q96Q11	PF12627	PolyA_pol_RNAbd	58	6352.3	5.33	8	4	909	8480	0	20.77	131.21	0.116	5
Q16656.1	PF10492	Nrf1_activ_bdg	55	5702.51	3.92	4	1	805	1490	0	22.3	102.55	0.358	1	1.74	Q96Q11	PF12627	PolyA_pol_RNAbd	58	6352.3	5.33	8	4	909	8480	0	20.77	131.21	0.116	5
Q05048.1	PF16699	CSTF1_dimer	57	6413.45	5	7	5	920	4470	4470	36.39	130	-0.032	1	1.74	P06132.2	PF01208	URO-D	347	38590.1	5.77	41	34	5429	44265	43890	48.53	90	-0.096	4
Q05048.1	PF00400	WD40	39	4220.7	5.52	5	4	583	4595	4470	8.76	75.13	-0.308	1	1.74	P06132.2	PF01208	URO-D	347	38590.1	5.77	41	34	5429	44265	43890	48.53	90	-0.096	4
P22304	PF00884	Sulfatase	380	42514.1	5.35	42	30	5942	54570	54320	41.37	84.16	-0.252	3	1.74	P51857	PF00248	Aldo_ket_red	285	32538.5	8.61	34	38	4608	40255	39880	39.02	92	-0.347	4
Q8N9N5	PF10523	BEN	70	8205.51	9.47	6	11	1159	17085	16960	35.71	85	-0.411	1	1.74	Q15185.1	PF04969	CS	76	8963.13	7.02	13	13	1236	8730	8480	57.27	69.21	-0.641	4
Q5H9F3	PF15808	BCOR	247	28656.8	9.04	42	48	3970	24200	23950	85.49	50.97	-1.366	5	1.74	Q16854.2	PF01712	dNK	235	27577.6	6.09	29	25	3882	52035	51910	57.01	90.47	-0.285	5
Q5H9F3	PF12796	Ank_2	95	10435.5	4.65	15	6	1436	15595	15470	41.29	92.42	-0.302	1	1.74	Q16854.2	PF01712	dNK	235	27577.6	6.09	29	25	3882	52035	51910	57.01	90.47	-0.285	5
Q5H9F3	PF16553	PUFD	118	13533.4	4.97	17	13	1891	10095	9970	53.11	80.08	-0.338	1	1.74	Q16854.2	PF01712	dNK	235	27577.6	6.09	29	25	3882	52035	51910	57.01	90.47	-0.285	5
Q6P2C8.1	PF11571	Med27	83	9893.42	8.96	7	10	1380	21095	20970	37.28	73.98	-0.346	1	1.74	P13995	PF00763	THF_DHG_CYH	117	12942.7	5.15	18	13	1837	6990	6990	49.59	109.06	-0.362	4
Q6P2C8.1	PF11571	Med27	83	9893.42	8.96	7	10	1380	21095	20970	37.28	73.98	-0.346	1	1.74	P13995	PF02882	THF_DHG_CYH_C	175	18656	9.55	14	20	2681	15470	15470	12.6	104.69	0.145	5
Q96BN2	PF12767	SAGA-Tad1	127	14205.1	9.41	14	19	2008	17990	17990	27.28	75.35	-0.739	1	1.74	Q9NT62.1	PF03986	Autophagy_N	184	20524.7	4.35	45	19	2832	25815	25440	39.57	73.7	-0.646	4
Q96BN2	PF12767	SAGA-Tad1	127	14205.1	9.41	14	19	2008	17990	17990	27.28	75.35	-0.739	1	1.74	Q9NT62.1	PF03987	Autophagy_act_C	62	7480.49	6.18	8	6	1031	13075	12950	55.67	62.74	-0.892	4
Q96BN2	PF12767	SAGA-Tad1	127	14205.1	9.41	14	19	2008	17990	17990	27.28	75.35	-0.739	1	1.74	Q9NT62.1	PF10381	Autophagy_C	25	3073.69	6.72	2	2	444	4470	0	38.18	132.4	0.712	4
P52657.1	PF02268	TFIIA_gamma_N	48	5347.07	4.32	4	2	764	2980	0	52.55	124.17	-0.015	1	1.74	Q9NX20	PF00252	Ribosomal_L16	134	14872.3	9.78	13	19	2100	13980	13980	36.59	75.67	-0.246	5
P52657.1	PF02751	TFIIA_gamma_C	44	5154.89	5.05	7	6	722	7115	6990	3.58	92.73	-0.041	1	1.74	Q9NX20	PF00252	Ribosomal_L16	134	14872.3	9.78	13	19	2100	13980	13980	36.59	75.67	-0.246	5
P29083.2	PF02002	TFIIE_alpha	108	12956	9.69	15	23	1841	9065	8940	42.88	92.04	-0.613	1	1.74	O60477.2	PF01823	MACPF	154	18035.7	10.58	15	27	2549	14440	0	49.7	76.62	-0.636	4
P29083.2	PF08271	TF_Zn_Ribbon	50	5679.4	4.6	9	5	769	250	0	59.63	41	-0.438	1	1.74	O60477.2	PF01823	MACPF	154	18035.7	10.58	15	27	2549	14440	0	49.7	76.62	-0.636	4
P29083.2	PF11521	TFIIE-A_C	86	9784.49	3.95	27	7	1319	2980	0	79.42	51.05	-0.95	1	1.74	O60477.2	PF01823	MACPF	154	18035.7	10.58	15	27	2549	14440	0	49.7	76.62	-0.636	4
Q9NQ92	PF15340	COPR5	151	16901	3.99	37	9	2252	28085	27960	51.16	42.12	-1.109	1	1.74	Q16854.2	PF01712	dNK	235	27577.6	6.09	29	25	3882	52035	51910	57.01	90.47	-0.285	5
O95766	PF08217	DUF1712	401	46911.9	6.05	55	49	6572	35215	34840	47.45	81.65	-0.396	8	1.74	Q9GZZ1	PF00583	Acetyltransf_1	136	15834.3	8.85	15	19	2236	13660	13410	49.56	96.03	-0.259	4
P52701.2	PF00855	PWWP	95	10975.5	9.52	10	15	1531	27960	27960	33.35	57.47	-0.676	1	1.74	O60760.3	PF02798	GST_N	70	8347.67	6.93	9	9	1190	14440	0	28.93	106	-0.21	4
P52701.2	PF01624	MutS_I	120	14035.4	9.45	12	19	1970	27055	26930	28.63	74.67	-0.342	1	1.74	O60760.3	PF02798	GST_N	70	8347.67	6.93	9	9	1190	14440	0	28.93	106	-0.21	4
P52701.2	PF05188	MutS_II	167	18600.4	5.79	22	20	2626	13200	12950	36.97	89.28	-0.168	4	1.74	O60760.3	PF02798	GST_N	70	8347.67	6.93	9	9	1190	14440	0	28.93	106	-0.21	4
P52701.2	PF05192	MutS_III	327	37845.6	7.62	49	50	5357	44390	43890	38.11	93.03	-0.46	5	1.74	O60760.3	PF02798	GST_N	70	8347.67	6.93	9	9	1190	14440	0	28.93	106	-0.21	4
P52701.2	PF05190	MutS_IV	93	11163.5	7.93	16	17	1564	20065	19940	36.67	74.52	-1.074	9	1.74	O60760.3	PF02798	GST_N	70	8347.67	6.93	9	9	1190	14440	0	28.93	106	-0.21	4
P52701.2	PF00488	MutS_V	195	21367.6	6.09	22	19	2990	7825	7450	38.72	86.05	0.03	1	1.74	O60760.3	PF02798	GST_N	70	8347.67	6.93	9	9	1190	14440	0	28.93	106	-0.21	4
P52701.2	PF00855	PWWP	95	10975.5	9.52	10	15	1531	27960	27960	33.35	57.47	-0.676	1	1.74	O60760.3	PF14497	GST_C_3	103	12161	5.59	14	12	1707	32095	31970	24.74	89.9	-0.284	4
P52701.2	PF01624	MutS_I	120	14035.4	9.45	12	19	1970	27055	26930	28.63	74.67	-0.342	1	1.74	O60760.3	PF14497	GST_C_3	103	12161	5.59	14	12	1707	32095	31970	24.74	89.9	-0.284	4
P52701.2	PF05188	MutS_II	167	18600.4	5.79	22	20	2626	13200	12950	36.97	89.28	-0.168	4	1.74	O60760.3	PF14497	GST_C_3	103	12161	5.59	14	12	1707	32095	31970	24.74	89.9	-0.284	4
P52701.2	PF05192	MutS_III	327	37845.6	7.62	49	50	5357	44390	43890	38.11	93.03	-0.46	5	1.74	O60760.3	PF14497	GST_C_3	103	12161	5.59	14	12	1707	32095	31970	24.74	89.9	-0.284	4
P52701.2	PF05190	MutS_IV	93	11163.5	7.93	16	17	1564	20065	19940	36.67	74.52	-1.074	9	1.74	O60760.3	PF14497	GST_C_3	103	12161	5.59	14	12	1707	32095	31970	24.74	89.9	-0.284	4
P52701.2	PF00488	MutS_V	195	21367.6	6.09	22	19	2990	7825	7450	38.72	86.05	0.03	1	1.74	O60760.3	PF14497	GST_C_3	103	12161	5.59	14	12	1707	32095	31970	24.74	89.9	-0.284	4
Q92560.2	PF01088	Peptidase_C12	211	23895.2	5.38	31	23	3346	29575	29450	41.3	86.35	-0.277	4	1.74	O60783	PF00253	Ribosomal_S14	54	6294.39	12	3	13	898	5625	5500	64.02	86.67	-0.554	5
Q92560.2	PF18031	UCH_C	46	5556.39	5.72	9	8	774	3105	2980	65.8	72.17	-0.667	3	1.74	O60783	PF00253	Ribosomal_S14	54	6294.39	12	3	13	898	5625	5500	64.02	86.67	-0.554	5
Q00403.1	PF08271	TF_Zn_Ribbon	43	4749.38	4.23	8	3	651	7115	6990	31.77	90.47	0.072	1	1.74	Q8WUN7	PF16455	UBD	105	12029.5	5.13	18	13	1668	22585	22460	50.17	69.9	-0.776	4
Q00403.1	PF00382	TFIIB	71	8071.39	9.66	7	13	1150	3105	2980	40.7	92.11	-0.344	1	1.74	Q8WUN7	PF16455	UBD	105	12029.5	5.13	18	13	1668	22585	22460	50.17	69.9	-0.776	4
Q00403.1	PF08271	TF_Zn_Ribbon	43	4749.38	4.23	8	3	651	7115	6990	31.77	90.47	0.072	1	1.74	Q8WUN7	PF00240	ubiquitin	72	8367.82	10.2	8	14	1204	6990	0	51.22	89.17	-0.404	4
Q00403.1	PF00382	TFIIB	71	8071.39	9.66	7	13	1150	3105	2980	40.7	92.11	-0.344	1	1.74	Q8WUN7	PF00240	ubiquitin	72	8367.82	10.2	8	14	1204	6990	0	51.22	89.17	-0.404	4
P62487.1	PF03876	SHS2_Rpb7-N	70	7783.11	8.88	5	7	1118	5960	5960	23.1	104.29	0.234	1	1.74	P54687.3	PF01063	Aminotran_4	251	28123.2	4.92	31	23	3935	46785	46410	34.01	87.73	-0.109	4
P62487.1	PF00575	S1	84	9442.78	4.64	14	9	1321	1615	1490	31.43	84.52	-0.235	1	1.74	P54687.3	PF01063	Aminotran_4	251	28123.2	4.92	31	23	3935	46785	46410	34.01	87.73	-0.109	4
Q9H8M7.1	PF13898	DUF4205	296	32812.4	5.04	39	25	4579	44055	43430	54.79	89.29	-0.023	1	1.74	P40939	PF00378	ECH_1	199	21236.7	7.81	23	24	3035	8730	8480	35.55	100.45	-0.049	5
Q9H8M7.1	PF13898	DUF4205	296	32812.4	5.04	39	25	4579	44055	43430	54.79	89.29	-0.023	1	1.74	P40939	PF02737	3HCDH_N	180	19438.6	7.99	22	23	2797	2980	2980	23.5	106.17	0.062	5
Q9H8M7.1	PF13898	DUF4205	296	32812.4	5.04	39	25	4579	44055	43430	54.79	89.29	-0.023	1	1.74	P40939	PF00725	3HCDH	96	10348	6.78	11	11	1464	4470	4470	29.72	84.17	0.051	5
Q9H4Z2.1	PF13894	zf-C2H2_4	24	2845.41	9.85	0	4	395	1615	1490	36.67	40.42	-0.629	1	1.74	P54098.1	PF18136	DNApol_Exo	294	33415.1	6.02	33	29	4678	72670	72420	48.42	82.96	-0.393	5
Q9H4Z2.1	PF13909	zf-H2C2_5	25	2985.45	10.06	1	6	413	125	0	56.05	35.2	-1.316	1	1.74	P54098.1	PF18136	DNApol_Exo	294	33415.1	6.02	33	29	4678	72670	72420	48.42	82.96	-0.393	5
Q9H4Z2.1	PF13894	zf-C2H2_4	24	2845.41	9.85	0	4	395	1615	1490	36.67	40.42	-0.629	1	1.74	P54098.1	PF00476	DNA_pol_A	432	48539.5	8.45	49	52	6797	88265	87890	44.43	82.01	-0.279	5
Q9H4Z2.1	PF13909	zf-H2C2_5	25	2985.45	10.06	1	6	413	125	0	56.05	35.2	-1.316	1	1.74	P54098.1	PF00476	DNA_pol_A	432	48539.5	8.45	49	52	6797	88265	87890	44.43	82.01	-0.279	5
Q15562	PF01285	TEA	70	8087.37	10.2	7	14	1155	9970	9970	68.91	86.43	-0.623	1	1.74	Q9NP74	PF03285	Paralemmin	448	51003.4	5.01	85	56	7103	26360	26360	62.53	69.2	-1.052	4
Q15562	PF17725	YBD	219	24957.3	5.92	27	22	3475	26150	25900	45.29	80.05	-0.297	1	1.74	Q9NP74	PF03285	Paralemmin	448	51003.4	5.01	85	56	7103	26360	26360	62.53	69.2	-1.052	4
Q16533.1	PF09808	SNAPc_SNAP43	185	22293.9	9.07	24	29	3138	28545	28420	27.29	81.73	-0.427	1	1.74	Q08257.1	PF08240	ADH_N	92	9889.13	7.02	10	10	1389	8940	8940	27.91	80.54	-0.249	4
Q16533.1	PF09808	SNAPc_SNAP43	185	22293.9	9.07	24	29	3138	28545	28420	27.29	81.73	-0.427	1	1.74	Q08257.1	PF13602	ADH_zinc_N_2	136	14847.1	6.22	16	14	2110	11460	0	29.58	103.24	-0.07	4
Q5XKR4	PF00046	Homeodomain	57	7072.18	11.24	6	14	1005	12490	0	65.2	65.09	-1.04	4	1.74	Q9H6S1.1	PF12845	TBD	53	5960.85	7.79	6	7	837	7115	6990	38.51	84.72	-0.421	4
Q5XKR4	PF03826	OAR	19	2108.54	11.71	1	4	316	5500	0	32.88	102.63	-0.226	1	1.74	Q9H6S1.1	PF12845	TBD	53	5960.85	7.79	6	7	837	7115	6990	38.51	84.72	-0.421	4
P13284	PF03227	GILT	104	12138.1	4.3	18	7	1683	17335	16960	54.58	98.37	0.127	3	1.74	P41252.2	PF00133	tRNA-synt_1	612	70750.8	5.9	80	71	9873	140565	139690	38.28	79.59	-0.297	4
P13284	PF03227	GILT	104	12138.1	4.3	18	7	1683	17335	16960	54.58	98.37	0.127	3	1.74	P41252.2	PF08264	Anticodon_1	160	18839.4	8.89	19	22	2703	21555	21430	41.66	112.56	0.101	4
Q99967.2	PF04487	CITED	270	28496.6	6.42	17	11	3834	11585	11460	51.33	46.33	-0.6	1	1.74	Q16612.1	PF11092	Alveol-reg_P311	67	7777.89	9.16	8	10	1098	9970	0	58.7	71.19	-0.7	4
O00462	PF02836	Glyco_hydro_2_C	242	28139.6	4.7	30	19	3882	75985	75860	38.57	74.92	-0.26	8	1.74	Q9BYC8	PF01783	Ribosomal_L32p	58	6796.99	9.5	6	14	959	3355	2980	71.74	72.24	-0.883	5
O00462	PF17786	Mannosidase_ig	96	10962.4	5.46	12	8	1506	14960	14440	56.67	76.98	-0.173	8	1.74	Q9BYC8	PF01783	Ribosomal_L32p	58	6796.99	9.5	6	14	959	3355	2980	71.74	72.24	-0.883	5
O00462	PF17753	Ig_mannosidase	80	9013.25	4.45	10	5	1266	12490	12490	38.25	91.38	0.101	8	1.74	Q9BYC8	PF01783	Ribosomal_L32p	58	6796.99	9.5	6	14	959	3355	2980	71.74	72.24	-0.883	5
Q9Y294.1	PF04729	ASF1_hist_chap	154	17557.8	4.42	23	11	2447	21555	21430	49.23	89.09	-0.196	1	1.74	P83881	PF00935	Ribosomal_L44	78	9204.9	10.46	5	24	1324	6085	5960	51.87	55	-1.264	4
O75150.5	PF13920	zf-C3HC4_3	48	5530.57	9.41	3	11	762	1990	1490	21.16	44.79	-0.369	1	1.74	P49902.1	PF05761	5_nucleotid	455	52409.1	6.64	55	53	7350	64095	63720	30.83	83.96	-0.212	4
P49917.2	PF04675	DNA_ligase_A_N	194	22430.2	9.72	21	32	3211	18575	18450	28.46	98.61	-0.338	1	1.74	P49753	PF04775	Bile_Hydr_Trans	126	14087.2	6.36	20	19	2011	8480	8480	36.47	99.84	-0.36	5
P49917.2	PF01068	DNA_ligase_A_M	204	23609.1	6.36	30	28	3305	19035	18910	43.19	75.54	-0.565	1	1.74	P49753	PF04775	Bile_Hydr_Trans	126	14087.2	6.36	20	19	2011	8480	8480	36.47	99.84	-0.36	5
P49917.2	PF04679	DNA_ligase_A_C	255	28555.2	8.49	33	37	4031	27430	26930	49.06	81.8	-0.393	1	1.74	P49753	PF04775	Bile_Hydr_Trans	126	14087.2	6.36	20	19	2011	8480	8480	36.47	99.84	-0.36	5
P49917.2	PF00533	BRCT	77	8614.82	4.72	11	7	1204	8605	8480	48.83	91.04	-0.136	1	1.74	P49753	PF04775	Bile_Hydr_Trans	126	14087.2	6.36	20	19	2011	8480	8480	36.47	99.84	-0.36	5
P49917.2	PF11411	DNA_ligase_IV	34	4047.42	4.65	7	4	551	4470	4470	0.44	57.35	-0.841	1	1.74	P49753	PF04775	Bile_Hydr_Trans	126	14087.2	6.36	20	19	2011	8480	8480	36.47	99.84	-0.36	5
P49917.2	PF04675	DNA_ligase_A_N	194	22430.2	9.72	21	32	3211	18575	18450	28.46	98.61	-0.338	1	1.74	P49753	PF08840	BAAT_C	209	23007.3	6.86	21	20	3228	28670	28420	42.8	86.32	-0.194	4
P49917.2	PF01068	DNA_ligase_A_M	204	23609.1	6.36	30	28	3305	19035	18910	43.19	75.54	-0.565	1	1.74	P49753	PF08840	BAAT_C	209	23007.3	6.86	21	20	3228	28670	28420	42.8	86.32	-0.194	4
P49917.2	PF04679	DNA_ligase_A_C	255	28555.2	8.49	33	37	4031	27430	26930	49.06	81.8	-0.393	1	1.74	P49753	PF08840	BAAT_C	209	23007.3	6.86	21	20	3228	28670	28420	42.8	86.32	-0.194	4
P49917.2	PF00533	BRCT	77	8614.82	4.72	11	7	1204	8605	8480	48.83	91.04	-0.136	1	1.74	P49753	PF08840	BAAT_C	209	23007.3	6.86	21	20	3228	28670	28420	42.8	86.32	-0.194	4
P49917.2	PF11411	DNA_ligase_IV	34	4047.42	4.65	7	4	551	4470	4470	0.44	57.35	-0.841	1	1.74	P49753	PF08840	BAAT_C	209	23007.3	6.86	21	20	3228	28670	28420	42.8	86.32	-0.194	4
Q9BWT1	PF10497	zf-4CXXC_R1	99	11302.9	8.92	7	14	1529	19200	18450	22.83	54.14	-0.616	3	1.74	Q9P2W6	PF15399	DUF4620	113	12087.8	6.54	9	8	1672	33250	33000	80.58	70.09	-0.364	4
P17480.1	PF00505	HMG_box	69	8656.27	10.09	9	20	1245	5960	0	45.46	55.22	-1.254	1	1.74	Q14894	PF02423	OCD_Mu_crystall	312	33557.3	5.06	40	28	4748	32555	32430	32.94	95.32	0.089	4
P17480.1	PF09011	HMG_box_2	67	7924.2	9.06	9	13	1110	11585	11460	45.17	58.21	-1.007	1	1.74	Q14894	PF02423	OCD_Mu_crystall	312	33557.3	5.06	40	28	4748	32555	32430	32.94	95.32	0.089	4
P17480.1	PF14887	HMG_box_5	85	10076.7	9.77	13	20	1424	19480	0	47.19	54.12	-1.122	1	1.74	Q14894	PF02423	OCD_Mu_crystall	312	33557.3	5.06	40	28	4748	32555	32430	32.94	95.32	0.089	4
O43365.1	PF00046	Homeodomain	57	7174.43	10.72	5	15	1023	9970	9970	39.01	71.93	-0.988	1	1.74	P08319	PF08240	ADH_N	133	14385.7	8.56	11	14	2040	4845	4470	22.84	92.33	0.11	4
O43365.1	PF13293	DUF4074	65	6551.15	6.44	4	2	892	2980	0	21.01	51.23	-0.686	1	1.74	P08319	PF08240	ADH_N	133	14385.7	8.56	11	14	2040	4845	4470	22.84	92.33	0.11	4
O43365.1	PF00046	Homeodomain	57	7174.43	10.72	5	15	1023	9970	9970	39.01	71.93	-0.988	1	1.74	P08319	PF00107	ADH_zinc_N	133	13675.8	5.79	14	13	1937	11250	11000	30.49	95.41	0.305	4
O43365.1	PF13293	DUF4074	65	6551.15	6.44	4	2	892	2980	0	21.01	51.23	-0.686	1	1.74	P08319	PF00107	ADH_zinc_N	133	13675.8	5.79	14	13	1937	11250	11000	30.49	95.41	0.305	4
P52657.1	PF02268	TFIIA_gamma_N	48	5347.07	4.32	4	2	764	2980	0	52.55	124.17	-0.015	1	1.74	P14324.4	PF00348	polyprenyl_synt	267	30666.3	5.19	36	31	4330	47705	47330	38.32	98.28	-0.193	4
P52657.1	PF02751	TFIIA_gamma_C	44	5154.89	5.05	7	6	722	7115	6990	3.58	92.73	-0.041	1	1.74	P14324.4	PF00348	polyprenyl_synt	267	30666.3	5.19	36	31	4330	47705	47330	38.32	98.28	-0.193	4
O96019.1	PF00022	Actin	422	46809.2	5.39	51	40	6510	54360	53860	44.57	77.61	-0.279	1	1.74	Q8IUQ0	PF03765	CRAL_TRIO_N	73	8524.76	6.22	11	10	1211	0	0	42.56	103.01	-0.373	5
O96019.1	PF00022	Actin	422	46809.2	5.39	51	40	6510	54360	53860	44.57	77.61	-0.279	1	1.74	Q8IUQ0	PF00650	CRAL_TRIO	155	17799.6	8.24	15	16	2543	20970	0	46.66	110.77	0	4
Q9H8M7.1	PF13898	DUF4205	296	32812.4	5.04	39	25	4579	44055	43430	54.79	89.29	-0.023	1	1.74	P09132.3	PF01922	SRP19	99	11380.2	9.44	10	16	1614	13075	12950	45.78	88.59	-0.384	4
Q16656.1	PF10491	Nrf1_DNA-bind	209	23575.2	9.71	22	33	3348	35075	34950	44.15	79.81	-0.517	1	1.74	P51970	PF06747	CHCH	36	4373.92	4.95	6	4	589	8730	8480	50.17	46.11	-0.675	5
Q16656.1	PF10492	Nrf1_activ_bdg	55	5702.51	3.92	4	1	805	1490	0	22.3	102.55	0.358	1	1.74	P51970	PF06747	CHCH	36	4373.92	4.95	6	4	589	8730	8480	50.17	46.11	-0.675	5
O43513.1	PF05983	Med7	158	18832	6.72	24	23	2680	5960	5960	50.76	97.47	-0.534	1	1.74	P34897.3	PF00464	SHMT	400	44165.6	8.39	46	49	6224	33725	33350	40.06	91.53	-0.189	4
Q5XKR4	PF00046	Homeodomain	57	7072.18	11.24	6	14	1005	12490	0	65.2	65.09	-1.04	4	1.74	P83881	PF00935	Ribosomal_L44	78	9204.9	10.46	5	24	1324	6085	5960	51.87	55	-1.264	4
Q5XKR4	PF03826	OAR	19	2108.54	11.71	1	4	316	5500	0	32.88	102.63	-0.226	1	1.74	P83881	PF00935	Ribosomal_L44	78	9204.9	10.46	5	24	1324	6085	5960	51.87	55	-1.264	4
P78527.3	PF08163	NUC194	297	34527.3	6.12	44	40	4815	25370	24870	57.85	78.45	-0.48	1	1.74	P31350.1	PF00268	Ribonuc_red_sm	268	31402.3	5.31	41	31	4409	45170	44920	41.17	89.89	-0.053	4
P78527.3	PF02259	FAT	448	51310.4	5.11	64	50	7203	55850	55350	65.23	92.34	-0.409	1	1.74	P31350.1	PF00268	Ribonuc_red_sm	268	31402.3	5.31	41	31	4409	45170	44920	41.17	89.89	-0.053	4
P78527.3	PF00454	PI3_PI4_kinase	269	30523.4	8.45	28	30	4289	31065	30940	49.22	85.2	-0.135	1	1.74	P31350.1	PF00268	Ribonuc_red_sm	268	31402.3	5.31	41	31	4409	45170	44920	41.17	89.89	-0.053	4
P78527.3	PF02260	FATC	32	3722.18	4.08	6	2	506	16500	16500	57.73	60.94	-0.678	1	1.74	P31350.1	PF00268	Ribonuc_red_sm	268	31402.3	5.31	41	31	4409	45170	44920	41.17	89.89	-0.053	4
Q6PJT7.1	PF14608	zf-CCCH_2	18	2122.38	6.89	2	2	2276	8605	8480	60.11	11.11	-1.15	1	1.74	Q9NZD2	PF08718	GLTP	150	17006.9	9.04	15	19	2423	25565	25440	37.86	93.07	-0.083	4
Q8TAE8.1	PF10147	CR6_interact	211	24414.9	10.11	29	42	3444	40450	40450	75.12	66.35	-1.046	5	1.74	Q9BUE6	PF01521	Fe-S_biosyn	103	11279.9	5.85	15	14	1595	4595	4470	22.75	85.05	-0.389	5
P32780.1	PF08567	PH_TFIIH	82	9330.67	8.8	11	13	1316	8480	8480	28.6	78.66	-0.621	3	1.74	P21673.1	PF00583	Acetyltransf_1	132	15550.9	5.17	20	13	2155	30160	29910	50.51	81.97	-0.167	4
P32780.1	PF03909	BSD	57	6973.88	8.94	6	8	959	11460	11460	57.11	54.74	-0.77	1	1.74	P21673.1	PF00583	Acetyltransf_1	132	15550.9	5.17	20	13	2155	30160	29910	50.51	81.97	-0.167	4
Q5TB30	PF00610	DEP	80	9550.81	9.58	9	13	1332	13980	13980	36.78	70.62	-0.871	5	1.74	O00764	PF08543	Phos_pyr_kin	214	23960.7	6.66	25	24	3382	21555	21430	33.93	95.09	-0.195	4
Q7Z591	PF12443	AKNA	98	10772	5.27	16	10	1493	3105	2980	70.06	66.94	-0.915	1	1.74	P10155.2	PF05731	TROVE	354	40601.4	9.21	45	58	5793	53900	53400	31.77	93.42	-0.368	4
Q9Y6W3	PF04212	MIT	62	7164.98	5.22	10	7	997	7450	0	38.61	85.16	-0.469	1	1.74	P06132.2	PF01208	URO-D	347	38590.4	5.77	41	34	5429	44265	43890	48.53	90	-0.096	4
Q9Y6W3	PF00648	Peptidase_C2	297	34439.4	8.63	33	37	4814	77600	77350	37.15	77.78	-0.459	1	1.74	P06132.2	PF01208	URO-D	347	38590.4	5.77	41	34	5429	44265	43890	48.53	90	-0.096	4
Q9Y6W3	PF01067	Calpain_III	110	12186.7	6.31	10	9	1690	11585	11460	45.16	68.18	-0.345	1	1.74	P06132.2	PF01208	URO-D	347	38590.4	5.77	41	34	5429	44265	43890	48.53	90	-0.096	4
Q9NV56.1	PF07904	Eaf7	145	16551.8	5.65	27	21	2296	7115	6990	57.2	68.48	-0.737	1	1.74	Q96RP9	PF00009	GTP_EFTU	276	30871.7	7.2	34	34	4372	16055	15930	41.66	96.81	-0.148	5
Q9NV56.1	PF07904	Eaf7	145	16551.8	5.65	27	21	2296	7115	6990	57.2	68.48	-0.737	1	1.74	Q96RP9	PF03144	GTP_EFTU_D2	67	7637.68	6.77	10	10	1060	6085	5960	28.17	71.34	-0.501	5
Q9NV56.1	PF07904	Eaf7	145	16551.8	5.65	27	21	2296	7115	6990	57.2	68.48	-0.737	1	1.74	Q96RP9	PF14492	EFG_II	75	8539.76	5.8	12	11	1197	4595	4470	24.78	70.13	-0.572	5
Q9NV56.1	PF07904	Eaf7	145	16551.8	5.65	27	21	2296	7115	6990	57.2	68.48	-0.737	1	1.74	Q96RP9	PF03764	EFG_IV	122	13159.9	5.78	16	13	1849	2980	2980	42.82	75.98	-0.297	5
Q9NV56.1	PF07904	Eaf7	145	16551.8	5.65	27	21	2296	7115	6990	57.2	68.48	-0.737	1	1.74	Q96RP9	PF00679	EFG_C	88	9858.02	4.2	14	5	1351	9065	8940	57.88	75.23	-0.28	5
Q15291.2	PF00400	WD40	37	4088.67	7	3	3	571	11125	11000	55.28	105.41	0.119	1	1.74	Q8N983	PF05047	L51_S25_CI-B8	53	6062.94	6.81	8	8	849	3105	2980	35.29	91.7	-0.153	5
O15514.1	PF03874	RNA_pol_Rpb4	108	12635.3	5.24	20	15	1781	1615	1490	61.95	90.37	-0.641	1	1.74	Q9BYN0	PF02195	ParBc	92	10153.6	6.05	9	8	1440	12950	12950	54.02	102.72	-0.08	4
Q00577.2	PF04845	PurA	221	25259.7	9.17	29	34	3552	20400	20400	46.75	74.12	-0.604	1	1.74	P50135	PF13489	Methyltransf_23	190	21734.1	6.13	25	23	3064	34170	33920	36.07	89.79	-0.324	4
P62304.1	PF01423	LSM	67	7972.21	8.11	9	10	1127	9970	9970	69.64	101.79	-0.485	1	1.74	Q8N1V2.3	PF00400	WD40	44	4847.45	5.45	4	3	671	6990	6990	41.87	82.05	-0.075	4
Q8TF76	PF12330	Haspin_kinase	397	44624	6.53	45	4	6252	46005	45380	34.76	85.94	-0.27	1	1.74	Q14204.5	PF08385	DHC_N1	591	68865.4	9.45	81	97	9812	75985	75860	40.26	96.65	-0.467	5
Q8TF76	PF12330	Haspin_kinase	397	44624	6.53	45	4	6252	46005	45380	34.76	85.94	-0.27	1	1.74	Q14204.5	PF08393	DHC_N2	402	47046.7	6.71	57	56	6716	80900	80900	37.8	106.12	-0.241	2
Q8TF76	PF12330	Haspin_kinase	397	44624	6.53	45	4	6252	46005	45380	34.76	85.94	-0.27	1	1.74	Q14204.5	PF12774	AAA_6	363	40702.8	5.48	46	39	5716	27890	27390	35.13	87.25	-0.208	9
Q8TF76	PF12330	Haspin_kinase	397	44624	6.53	45	4	6252	46005	45380	34.76	85.94	-0.27	1	1.74	Q14204.5	PF17852	Dynein_AAA_lid	128	14886.2	6.4	12	11	2087	27055	26930	42.14	94.53	-0.17	5
Q8TF76	PF12330	Haspin_kinase	397	44624	6.53	45	4	6252	46005	45380	34.76	85.94	-0.27	1	1.74	Q14204.5	PF12775	AAA_7	183	20704	7.18	19	19	2924	27180	26930	28.22	91.48	-0.088	5
Q8TF76	PF12330	Haspin_kinase	397	44624	6.53	45	4	6252	46005	45380	34.76	85.94	-0.27	1	1.74	Q14204.5	PF12780	AAA_8	280	31998.7	6.59	33	31	4483	37150	36900	39.11	87	-0.274	1
Q8TF76	PF12330	Haspin_kinase	397	44624	6.53	45	4	6252	46005	45380	34.76	85.94	-0.27	1	1.74	Q14204.5	PF12777	MT	338	38728.5	6.58	52	51	5480	34045	33920	50.34	89.82	-0.537	4
Q8TF76	PF12330	Haspin_kinase	397	44624	6.53	45	4	6252	46005	45380	34.76	85.94	-0.27	1	1.74	Q14204.5	PF12781	AAA_9	221	25331.9	5.05	35	30	3595	10095	9970	49.73	100.09	-0.352	1
Q8TF76	PF12330	Haspin_kinase	397	44624	6.53	45	4	6252	46005	45380	34.76	85.94	-0.27	1	1.74	Q14204.5	PF03028	Dynein_heavy	118	12916.1	8.71	9	11	1831	12615	12490	36.33	93.39	-0.01	5
Q8TF76	PF12330	Haspin_kinase	397	44624	6.53	45	4	6252	46005	45380	34.76	85.94	-0.27	1	1.74	Q14204.5	PF18198	AAA_lid_11	174	20207	7.89	23	24	2830	39085	38960	48.47	79.08	-0.486	5
Q8TF76	PF12330	Haspin_kinase	397	44624	6.53	45	4	6252	46005	45380	34.76	85.94	-0.27	1	1.74	Q14204.5	PF18199	Dynein_C	312	34968.2	8.13	34	36	4943	43805	43430	41.35	91.25	-0.211	5
Q9P2W1.1	PF07106	TBPIP	64	7254.34	9.57	6	10	1034	5960	0	43.6	86.88	-0.602	1	1.74	P35754.2	PF00462	Glutaredoxin	66	7503.77	7.91	6	7	1072	3105	2980	39.55	107.73	0.056	4
Q9P2W1.1	PF18517	LZ3wCH	58	7133.98	5.5	14	13	992	11460	11460	52.56	45.34	-1.512	1	1.74	P35754.2	PF00462	Glutaredoxin	66	7503.77	7.91	6	7	1072	3105	2980	39.55	107.73	0.056	4
O43365.1	PF00046	Homeodomain	57	7174.43	10.72	5	15	1023	9970	9970	39.01	71.93	-0.988	1	1.74	P48200.4	PF00330	Aconitase	85	9381.74	4.68	12	7	1311	5625	5500	52.83	82.59	-0.144	4
O43365.1	PF13293	DUF4074	65	6551.15	6.44	4	2	892	2980	0	21.01	51.23	-0.686	1	1.74	P48200.4	PF00330	Aconitase	85	9381.74	4.68	12	7	1311	5625	5500	52.83	82.59	-0.144	4
O43365.1	PF00046	Homeodomain	57	7174.43	10.72	5	15	1023	9970	9970	39.01	71.93	-0.988	1	1.74	P48200.4	PF00694	Aconitase_C	130	14204.5	9.8	10	18	2031	14440	0	22.19	88.69	-0.213	4
O43365.1	PF13293	DUF4074	65	6551.15	6.44	4	2	892	2980	0	21.01	51.23	-0.686	1	1.74	P48200.4	PF00694	Aconitase_C	130	14204.5	9.8	10	18	2031	14440	0	22.19	88.69	-0.213	4
Q05952	PF01254	TP2	138	15640.6	11.59	2	26	2157	7240	6990	92.73	26.88	-1.521	1	1.74	Q9Y3D3	PF00886	Ribosomal_S16	61	6814.75	9.06	5	8	945	8605	8480	35.06	78.36	-0.479	5
O94782.1	PF00443	UCH	568	64118.6	5.3	91	73	8985	36870	35870	47.53	79.58	-0.643	1	1.74	Q16612.1	PF11092	Alveol-reg_P311	67	7777.89	9.16	8	10	1098	9970	0	58.7	71.19	-0.7	4
Q8WYA6.1	PF08216	CTNNBL	106	12310	4.42	25	11	1735	2980	0	78.01	105.66	-0.448	1	1.74	Q9P0R6	PF05303	DUF727	101	11476	4.63	16	9	1604	9065	8940	21.66	100.4	-0.077	4
Q9Y5N6.1	PF05460	ORC6	91	10096.9	8.94	9	13	1437	10220	9970	52.66	104.07	0.045	1	1.74	O60783	PF00253	Ribosomal_S14	54	6294.39	12	3	13	898	5625	5500	64.02	86.67	-0.554	5
P25208.2	PF00808	CBFD_NFYB_HMF	46	5028.87	6.3	5	5	716	1615	1490	40.38	99.78	0.22	1	1.74	P40925.4	PF00056	Ldh_1_N	149	15933.8	8.54	16	18	2300	4595	4470	17.82	114.5	0.25	4
P25208.2	PF00808	CBFD_NFYB_HMF	46	5028.87	6.3	5	5	716	1615	1490	40.38	99.78	0.22	1	1.74	P40925.4	PF02866	Ldh_1_C	176	19604.3	6.4	24	23	2765	27960	27960	20.94	85.28	-0.308	4
P13984.2	PF17683	TFIIF_beta_N	93	10051.4	9.16	9	11	1426	12490	0	38.75	84.84	-0.349	1	1.74	Q6V1X1	PF00930	DPPIV_N	423	48547.8	5.1	65	43	6768	68340	67840	57.95	82.93	-0.389	4
P13984.2	PF02270	TFIIF_beta	65	7771.02	8.94	9	11	1112	11460	0	19.16	97.38	-0.605	1	1.74	Q6V1X1	PF00930	DPPIV_N	423	48547.8	5.1	65	43	6768	68340	67840	57.95	82.93	-0.389	4
P13984.2	PF17683	TFIIF_beta_N	93	10051.4	9.16	9	11	1426	12490	0	38.75	84.84	-0.349	1	1.74	Q6V1X1	PF00326	Peptidase_S9	209	24029.3	6.05	24	19	3355	34840	34840	41.31	92.34	-0.224	4
P13984.2	PF02270	TFIIF_beta	65	7771.02	8.94	9	11	1112	11460	0	19.16	97.38	-0.605	1	1.74	Q6V1X1	PF00326	Peptidase_S9	209	24029.3	6.05	24	19	3355	34840	34840	41.31	92.34	-0.224	4
Q01081.3	PF00642	zf-CCCH	27	3183.68	9.65	2	7	438	1615	1490	43.94	43.33	-0.956	1	1.74	Q13794.1	PF15150	PMAIP1	54	6030.08	10.3	4	11	863	125	0	56.19	74.26	-0.572	5
Q01081.3	PF00076	RRM_1	59	6986.69	4.41	15	6	952	8480	8480	56.59	70.85	-0.812	1	1.74	Q13794.1	PF15150	PMAIP1	54	6030.08	10.3	4	11	863	125	0	56.19	74.26	-0.572	5
Q9Y6W3	PF04212	MIT	62	7164.98	5.22	10	7	997	7450	0	38.61	85.16	-0.469	1	1.74	P82663	PF05047	L51_S25_CI-B8	52	6244.3	9.31	4	6	880	8480	0	40.67	74.81	-0.202	5
Q9Y6W3	PF00648	Peptidase_C2	297	34439.4	8.63	33	37	4814	77600	77350	37.15	77.78	-0.459	1	1.74	P82663	PF05047	L51_S25_CI-B8	52	6244.3	9.31	4	6	880	8480	0	40.67	74.81	-0.202	5
Q9Y6W3	PF01067	Calpain_III	110	12186.7	6.31	10	9	1690	11585	11460	45.16	68.18	-0.345	1	1.74	P82663	PF05047	L51_S25_CI-B8	52	6244.3	9.31	4	6	880	8480	0	40.67	74.81	-0.202	5
Q16656.1	PF10491	Nrf1_DNA-bind	209	23575.2	9.71	22	33	3348	35075	34950	44.15	79.81	-0.517	1	1.74	P23378.2	PF02347	GDC-P	424	47378.4	6.53	50	47	6654	35130	34380	44.45	92.5	-0.202	5
Q16656.1	PF10492	Nrf1_activ_bdg	55	5702.51	3.92	4	1	805	1490	0	22.3	102.55	0.358	1	1.74	P23378.2	PF02347	GDC-P	424	47378.4	6.53	50	47	6654	35130	34380	44.45	92.5	-0.202	5
Q16656.1	PF10491	Nrf1_DNA-bind	209	23575.2	9.71	22	33	3348	35075	34950	44.15	79.81	-0.517	1	1.74	P23378.2	PF01212	Beta_elim_lyase	157	17157.4	5.56	18	12	2371	10680	10430	17.29	80.19	-0.364	5
Q16656.1	PF10492	Nrf1_activ_bdg	55	5702.51	3.92	4	1	805	1490	0	22.3	102.55	0.358	1	1.74	P23378.2	PF01212	Beta_elim_lyase	157	17157.4	5.56	18	12	2371	10680	10430	17.29	80.19	-0.364	5
Q7Z5Q5	PF18049	DNA_pol_P_Exo	219	24485	5.53	27	22	3420	29950	29450	31.23	89.45	-0.138	1	1.74	P82930.2	PF16053	MRP-S34	127	14813.9	6.59	18	17	2079	33460	33460	48.6	79.92	-0.609	5
Q7Z5Q5	PF00476	DNA_pol_A	408	45637.8	9.32	42	53	6507	24325	23950	36.72	97.08	-0.215	1	1.74	P82930.2	PF16053	MRP-S34	127	14813.9	6.59	18	17	2079	33460	33460	48.6	79.92	-0.609	5
P06400.2	PF11934	DUF3452	120	13899.3	4.8	17	12	1989	10095	9970	43.6	116.92	0.287	1	1.74	O14713.1	PF10480	ICAP-1_inte_bdg	200	21782.5	5.95	25	23	3049	17670	17420	43.27	81.4	-0.38	5
P06400.2	PF01858	RB_A	201	23152.9	6.77	23	23	368	21680	21430	43.37	97.46	-0.093	1	1.74	O14713.1	PF10480	ICAP-1_inte_bdg	200	21782.5	5.95	25	23	3049	17670	17420	43.27	81.4	-0.38	5
P06400.2	PF01857	RB_B	120	14624.2	8.4	15	17	2081	17545	17420	30.19	107.17	-0.129	1	1.74	O14713.1	PF10480	ICAP-1_inte_bdg	200	21782.5	5.95	25	23	3049	17670	17420	43.27	81.4	-0.38	5
P06400.2	PF08934	Rb_C	158	17661.3	10	14	26	2501	5960	5960	66.29	62.34	-0.827	1	1.74	O14713.1	PF10480	ICAP-1_inte_bdg	200	21782.5	5.95	25	23	3049	17670	17420	43.27	81.4	-0.38	5
P35244.1	PF08661	Rep_fac-A_3	109	12232.1	5.08	16	11	1725	4595	4470	36.79	93.85	-0.023	1	1.74	P54687.3	PF01063	Aminotran_4	251	28123.2	4.92	31	23	3935	46785	46410	34.01	87.73	-0.109	4
P16383.2	PF07842	GCFC	218	25424.5	7.02	29	29	3630	39085	38960	39.26	102.34	-0.255	1	1.74	P35754.2	PF00462	Glutaredoxin	66	7503.77	7.91	6	7	1072	3105	2980	39.55	107.73	0.056	4
Q96T37	PF00076	RRM_1	68	7628.51	8.17	11	12	1068	1490	0	33.57	74.56	-0.616	3	1.74	Q9Y3E5	PF01981	PTH2	115	12493.7	9.48	9	15	1796	11585	11460	31.45	103.48	-0.055	5
Q96T37	PF07744	SPOC	178	18976.8	9.48	14	20	2701	1095	9970	51.71	94.83	-0.161	1	1.74	Q9Y3E5	PF01981	PTH2	115	12493.7	9.48	9	15	1796	11585	11460	31.45	103.48	-0.055	5
O60583.2	PF00134	Cyclin_N	140	16221.7	6.98	15	15	2287	10220	9970	66.61	94.79	-0.94	1	1.74	O14713.1	PF10480	ICAP-1_inte_bdg	200	21782.5	5.95	25	23	3049	17670	17420	43.27	81.4	-0.38	5
Q96T37	PF00076	RRM_1	68	7628.51	8.17	11	12	1068	1490	0	33.57	74.56	-0.616	3	1.74	P09132.3	PF01922	SRP19	99	11380.2	9.44	10	16	1614	13075	12950	45.78	88.59	-0.384	4
Q96T37	PF07744	SPOC	178	18976.8	9.48	14	20	2701	1095	9970	51.71	94.83	-0.161	1	1.74	P09132.3	PF01922	SRP19	99	11380.2	9.44	10	16	1614	13075	12950	45.78	88.59	-0.384	4
P54803	PF17387	Glyco_hydro_59M	117	13295.3	6.46	12	11	1885	16960	16960	38.96	94.1	-0.042	8	1.74	Q9UJM3.1	PF11555	Inhibitor_Mig-6	57	6202.01	10.28	3	8	874	2980	0	88.97	46.14	-1.098	1
P54803	PF17387	Glyco_hydro_59M	117	13295.3	6.46	12	11	1885	16960	16960	38.96	94.1	-0.042	8	1.74	Q9UJM3.1	PF11555	Inhibitor_Mig-6	57	6202.01	10.28	3	8	874	2980	0	88.97	46.14	-1.098	1
P54803	PF17387	Glyco_hydro_59M	117	13295.3	6.46	12	11	1885	16960	16960	38.96	94.1	-0.042	8	1.74	Q9UJM3.1	PF11555	Inhibitor_Mig-6	57	6202.01	10.28	3	8	874	2980	0	88.97	46.14	-1.098	1
P05423.2	PF05132	RNA_pol_Rpc4	127	13795	5.01	19	14	1974	125	0	36.79	105.04	-0.135	1	1.74	O00411.2	PF14700	RPOL_N	294	33453.9	8.6	31	35	4752	34420	33920	39.67	95.17	-0.258	5
P05423.2	PF05132	RNA_pol_Rpc4	127	13795	5.01	19	14	1974	125	0	36.79	105.04	-0.135	1	1.74	O00411.2	PF00940	RNA_pol	400	45341	8.97	41	48	6368	60765	60390	46.6	84.75	-0.3	5
Q8IXF0	PF00989	PAS	80	8596.68	4.48	10	3	1203	4470	0	44.54	98.62	0.065	1	1.74	P50135	PF13489	Methyltransf_23	190	21734.1	6.13	25	23	3064	34170	33920	36.07	89.79	-0.324	4
Q8IXF0	PF08447	PAS_3	80	8596.68	4.48	10	3	1203	4470	0	44.54	98.62	0.065	1	1.74	P50135	PF13489	Methyltransf_23	190	21734.1	6.13	25	23	3064	34170	33920	36.07	89.79	-0.324	4
O94864.1	PF07524	Bromo_TP	80	8994.29	5.38	10	6	1257	8605	8480	26.64	97.5	0.154	1	1.74	P15104.4	PF03951	Gln-synt_N	81	9312.56	4.71	14	10	1286	15595	15470	49.47	64.94	-0.553	5
O94864.1	PF07524	Bromo_TP	80	8994.29	5.38	10	6	1257	8605	8480	26.64	97.5	0.154	1	1.74	P15104.4	PF00120	Gln-synt_C	178	20106.8	6.32	20	17	2750	39795	39420	35.1	60.34	-0.475	4
Q86UU0.1	PF11502	BCL9	88	9073.02	5.58	10	8	1272	0	0	57.51	68.86	-0.752	1	1.74	Q9NVV4	PF17797	RL	71	8401.46	7.02	8	8	1161	4595	4470	45.54	64.51	-0.632	9
Q86UU0.1	PF11502	BCL9	88	9073.02	5.58	10	8	1272	0	0	57.51	68.86	-0.752	1	1.74	Q9NVV4	PF03828	PAP_assoc	49	5800.48	4.77	7	5	810	2980	0	42.8	73.67	-0.635	8
P06746.3	PF14716	HHH_8	67	7289.42	9.48	7	11	1045	4470	0	12.65	86.12	-0.376	4	1.74	O95848.2	PF00293	NUDIX	165	17722.9	4.7	24	14	2481	17085	16960	59.5	88.61	-0.156	4
P06746.3	PF10391	DNA_pol_lambd_f	50	5761.5	8.35	8	9	813	1490	0	7.5	78	-0.762	1	1.74	O95848.2	PF00293	NUDIX	165	17722.9	4.7	24	14	2481	17085	16960	59.5	88.61	-0.156	4
P06746.3	PF14792	DNA_pol_B_palm	114	13127.1	7.09	17	17	1855	3105	2980	38.9	82.81	-0.578	1	1.74	O95848.2	PF00293	NUDIX	165	17722.9	4.7	24	14	2481	17085	16960	59.5	88.61	-0.156	4
P06746.3	PF14791	DNA_pol_B_thumb	67	7695.69	5.72	10	9	1078	11460	0	26.16	74.18	-0.549	4	1.74	O95848.2	PF00293	NUDIX	165	17722.9	4.7	24	14	2481	17085	16960	59.5	88.61	-0.156	4
Q9NX01.1	PF02966	DIM1	133	15044.3	5.62	18	16	2137	8940	8940	24.18	95.19	-0.105	1	1.74	O95848.2	PF00293	NUDIX	165	17722.9	4.7	24	14	2481	17085	16960	59.5	88.61	-0.156	4
O94864.1	PF07524	Bromo_TP	80	8994.29	5.38	10	6	1257	8605	8480	26.64	97.5	0.154	1	1.74	O95786.2	PF16739	CARD_2	93	11051.4	4.56	16	9	1531	25440	0	60.75	74.62	-0.52	4
O94864.1	PF07524	Bromo_TP	80	8994.29	5.38	10	6	1257	8605	8480	26.64	97.5	0.154	1	1.74	O95786.2	PF00270	DEAD	177	19541.7	9.03	12	17	2771	9190	8940	25.22	91.92	-0.089	3
O94864.1	PF07524	Bromo_TP	80	8994.29	5.38	10	6	1257	8605	8480	26.64	97.5	0.154	1	1.74	O95786.2	PF18119	RIG-I_C	146	17477	6.94	25	25	2455	13075	12950	41.17	79.52	-0.636	4
O94864.1	PF07524	Bromo_TP	80	8994.29	5.38	10	6	1257	8605	8480	26.64	97.5	0.154	1	1.74	O95786.2	PF00271	Helicase_C	126	13997.3	8.62	13	15	2002	10095	9970	24.34	107.62	-0.044	4
O94864.1	PF07524	Bromo_TP	80	8994.29	5.38	10	6	1257	8605	8480	26.64	97.5	0.154	1	1.74	O95786.2	PF11648	RIG-I_C-RD	118	13822.1	8.83	15	20	1943	17335	16960	48.65	71.86	-0.297	4
Q07352.1	PF04553	Tis11B_N	105	11262.8	9.91	8	14	1584	1615	1490	62.43	69.71	-0.442	1	1.74	P13995	PF00763	THF_DHG_CYH	117	12942.7	5.15	18	13	1837	6990	6990	49.59	109.06	-0.362	4
Q07352.1	PF00642	zf-CCCH	27	3108.51	6.74	4	4	420	3105	2980	28.66	36.3	-0.796	1	1.74	P13995	PF00763	THF_DHG_CYH	117	12942.7	5.15	18	13	1837	6990	6990	49.59	109.06	-0.362	4
Q07352.1	PF04553	Tis11B_N	105	11262.8	9.91	8	14	1584	1615	1490	62.43	69.71	-0.442	1	1.74	P13995	PF02882	THF_DHG_CYH_C	175	18656	9.55	14	20	2681	15470	15470	12.6	104.69	0.145	5
Q07352.1	PF00642	zf-CCCH	27	3108.51	6.74	4	4	420	3105	2980	28.66	36.3	-0.796	1	1.74	P13995	PF02882	THF_DHG_CYH_C	175	18656	9.55	14	20	2681	15470	15470	12.6	104.69	0.145	5
Q9NX01.1	PF02966	DIM1	133	15044.3	5.62	18	16	2137	8940	8940	24.18	95.19	-0.105	1	1.74	P06132.2	PF01208	URO-D	347	38590.1	5.77	41	34	5429	44265	43890	48.53	90	-0.096	4
Q96AV8	PF02319	E2F_TDP	69	7876.12	9.52	6	10	1129	11460	11460	44.95	107.25	-0.201	1	1.74	Q2M3C7	PF05716	AKAP_110	112	12727.5	5.13	17	12	1789	19605	19480	60.3	87.95	-0.346	4
Q7Z5Q5	PF18049	DNA_pol_P_Exo	219	24485	5.53	27	22	3420	29950	29450	31.23	89.45	-0.138	1	1.74	Q9GZZ1	PF00583	Acetyltransf_1	136	15834.3	8.85	15	19	2236	13660	13410	49.56	96.03	-0.259	4
Q7Z5Q5	PF00476	DNA_pol_A	408	45637.8	9.32	42	53	6507	24325	23950	36.72	97.08	-0.215	1	1.74	Q9GZZ1	PF00583	Acetyltransf_1	136	15834.3	8.85	15	19	2236	13660	13410	49.56	96.03	-0.259	4
Q9HAN9.1	PF01467	CTP_transf_like	218	24946.6	9.26	26	34	3527	47690	47440	38.92	84.08	-0.567	1	1.74	P33402.1	PF07700	HNOB	171	19704.4	5.84	25	19	2742	9190	8940	53.94	82.69	-0.342	4
Q9HAN9.1	PF01467	CTP_transf_like	218	24946.6	9.26	26	34	3527	47690	47440	38.92	84.08	-0.567	1	1.74	P33402.1	PF07701	HNOBA	191	21623.2	7.85	27	28	3081	1740	1490	40.87	95.39	-0.243	4
Q9HAN9.1	PF01467	CTP_transf_like	218	24946.6	9.26	26	34	3527	47690	47440	38.92	84.08	-0.567	1	1.74	P33402.1	PF00211	Guanylate_cyc	188	2155.67	7.08	20	20	2973	9315	8940	32.2	89.68	0.046	4
O94864.1	PF07524	Bromo_TP	80	8994.29	5.38	10	6	1257	8605	8480	26.64	97.5	0.154	1	1.74	Q9BYN0	PF02195	ParBc	92	10153.6	6.05	9	8	1440	12950	12950	54.02	102.72	-0.08	4
P49736.4	PF12619	MCM2_N	133	15185.1	4.14	48	18	2060	4470	0	70.16	64.66	-1.335	1	1.74	Q8TF40	PF14636	FNIP_N	119	13104	9.08	12	17	1825	4720	4470	52.97	74.45	-0.428	4
P49736.4	PF14551	MCM_N	94	11103.7	6.3	14	11	1554	5960	5960	36.27	95.43	-0.359	1	1.74	Q8TF40	PF14636	FNIP_N	119	13104	9.08	12	17	1825	4720	4470	52.97	74.45	-0.428	4
P49736.4	PF17207	MCM_OB	129	14401.4	6.96	13	13	2010	7825	7450	63.24	84.57	-0.409	1	1.74	Q8TF40	PF14636	FNIP_N	119	13104	9.08	12	17	1825	4720	4470	52.97	74.45	-0.428	4
P49736.4	PF00493	MCM	224	24259.7	5.75	28	24	3423	11710	11460	32.72	94.46	-0.082	1	1.74	Q8TF40	PF14636	FNIP_N	119	13104	9.08	12	17	1825	4720	4470	52.97	74.45	-0.428	4
P49736.4	PF17855	MCM_lid	85	10018.8	8.31	13	14	1420	5960	0	51.17	96.35	-0.326	1	1.74	Q8TF40	PF14637	FNIP_M	234	26845.2	9.37	20	28	3780	27180	26930	44.21	82.52	-0.199	4
P49736.4	PF12619	MCM2_N	133	15185.1	4.14	48	18	2060	4470	0	70.16	64.66	-1.335	1	1.74	Q8TF40	PF14637	FNIP_M	234	26845.2	9.37	20	28	3780	27180	26930	44.21	82.52	-0.199	4
P49736.4	PF14551	MCM_N	94	11103.7	6.3	14	11	1554	5960	5960	36.27	95.43	-0.359	1	1.74	Q8TF40	PF14637	FNIP_M	234	26845.2	9.37	20	28	3780	27180	26930	44.21	82.52	-0.199	4
P49736.4	PF17207	MCM_OB	129	14401.4	6.96	13	13	2010	7825	7450	63.24	84.57	-0.409	1	1.74	Q8TF40	PF14637	FNIP_M	234	26845.2	9.37	20	28	3780	27180	26930	44.21	82.52	-0.199	4
P49736.4	PF00493	MCM	224	24259.7	5.75	28	24	3423	11710	11460	32.72	94.46	-0.082	1	1.74	Q8TF40	PF14637	FNIP_M	234	26845.2	9.37	20	28	3780	27180	26930	44.21	82.52	-0.199	4
P49736.4	PF17855	MCM_lid	85	10018.8	8.31	13	14	1420	5960	0	51.17	96.35	-0.326	1	1.74	Q8TF40	PF14637	FNIP_M	234	26845.2	9.37	20	28	3780	27180	26930	44.21	82.52	-0.199	4
P49736.4	PF12619	MCM2_N	133	15185.1	4.14	48	18	2060	4470	0	70.16	64.66	-1.335	1	1.74	Q8TF40	PF14638	FNIP_C	187	20710.9	6.16	19	16	2927	14690	14440	51.22	105.72	0.084	4
P49736.4	PF14551	MCM_N	94	11103.7	6.3	14	11	1554	5960	5960	36.27	95.43	-0.359	1	1.74	Q8TF40	PF14639	FNIP_C	187	20710.9	6.16	19	16	2927	14690	14440	51.22	105.72	0.084	4
P49736.4	PF17207	MCM_OB	129	14401.4	6.96	13	13	2010	7825	7450	63.24	84.57	-0.409	1	1.74	Q8TF40	PF14640	FNIP_C	187	20710.9	6.16	19	16	2927	14690	14440	51.22	105.72	0.084	4
P49736.4	PF00493	MCM	224	24259.7	5.75	28	24	3423	11710	11460	32.72	94.46	-0.082	1	1.74	Q8TF40	PF14641	FNIP_C	187	20710.9	6.16	19	16	2927	14690	14440	51.22	105.72	0.084	4
P49736.4	PF17855	MCM_lid	85	10018.8	8.31	13	14	1420	5960	0	51.17	96.35	-0.326	1	1.74	Q8TF40	PF14642	FNIP_C	187	20710.9	6.16	19	16	2927	14690	14440	51.22	105.72	0.084	4
P13984.2	PF17683	TFIIF_beta_N	93	10051.4	9.16	9	11	1426	12490	0	38.75	84.84	-0.349	1	1.74	Q13867.1	PF03051	Peptidase_C1_2	447	51785.4	5.96	61	53	7214	72475	71850	33.33	77.14	-0.397	4
P13984.2	PF02270	TFIIF_beta	65	7771.02	8.94	9	11	1112	11460	0	19.16	97.38	-0.605	1	1.74	Q13867.1	PF03051	Peptidase_C1_2	447	51785.4	5.96	61	53	7214	72475	71850	33.33	77.14	-0.397	4
Q92989.1	PF16573	CLP1_N	92	10455.9	5.34	13	10	1466	8480	8480	36.69	81.63	-0.27	1	1.74	Q16698	PF13561	adh_short_C2	240	25212	8.3	21	23	3565	21220	20970	21.14	88.67	0.049	5
Q92989.1	PF16575	CLP1_P	187	20890.8	8.83	21	25	2940	19160	18910	34.16	88.98	-0.221	1	1.74	Q16698	PF13561	adh_short_C2	240	25212	8.3	21	23	3565	21220	20970	21.14	88.67	0.049	5
Q92989.1	PF06807	Clp1	112	12397.3	5.15	13	8	1753	2980	2980	38.98	97.32	0.115	1	1.74	Q16698	PF13561	adh_short_C2	240	25212	8.3	21	23	3565	21220	20970	21.14	88.67	0.049	5
P09012.3	PF00076	RRM_1	72	8377.86	9.92	6	12	1202	4470	0	41.57	93.47	-0.172	1	1.74	P82914	PF00312	Ribosomal_S15	82	9902.58	9.72	12	19	1416	9970	9970	49.18	86.83	-0.862	5
O43913.1	PF13191	AAA_16	150	17220.8	5.49	18	13	2435	6210	5960	37.99	106.47	0.1	1	1.74	O75570	PF03462	PCRF	201	23436.4	5.64	30	23	3260	22140	21890	58.37	81.04	-0.726	5
O43913.1	PF14630	ORC5_C	255	29439.1	9.28	26	35	4200	33475	33350	34.57	99.06	-0.264	1	1.74	O75570	PF03462	PCRF	201	23436.4	5.64	30	23	3260	22140	21890	58.37	81.04	-0.726	5
O43913.1	PF13191	AAA_16	150	17220.8	5.49	18	13	2435	6210	5960	37.99	106.47	0.1	1	1.74	O75570	PF00472	RF-1	111	12925.6	10.07	15	23	1835	2980	2980	54.4	81.62	-0.974	5
O43913.1	PF14630	ORC5_C	255	29439.1	9.28	26	35	4200	33475	33350	34.57	99.06	-0.264	1	1.74	O75570	PF00472	RF-1	111	12925.6	10.07	15	23	1835	2980	2980	54.4	81.62	-0.974	5
P10071	PF00096	zf-C2H2	28	3565.26	9.84	2	6	496	7115	6990	84.73	62.5	-0.514	1	1.74	Q9BTM9.1	PF09138	Urm1	96	10896.4	4.54	17	9	1552	17990	0	35.75	117.71	-0.142	4
Q13416.2	PF04084	ORC2	311	36043.3	7.15	33	33	5108	43890	43890	47.31	102.48	-0.279	1	1.74	O14920.1	PF00069	Pkinase	283	32749.5	6.43	33	31	4589	57785	57410	44.09	89.89	-0.447	7
Q13416.2	PF04084	ORC2	311	36043.3	7.15	33	33	5108	43890	43890	47.31	102.48	-0.279	1	1.74	O14920.1	PF18397	IKBKB_SDD	278	32584.8	9.14	39	47	4626	28335	27960	53.28	89.03	-0.612	1
Q13416.2	PF04084	ORC2	311	36043.3	7.15	33	33	5108	43890	43890	47.31	102.48	-0.279	1	1.74	O14920.1	PF12179	IKKbetaNEMObind	37	4289.7	3.89	8	1	589	11000	11000	58.22	100.27	-0.284	9
Q9HAW0.1	PF08271	TF_Zn_Ribbon	38	3979.36	4.01	6	1	530	1740	1490	62.14	68.95	-0.055	1	1.74	Q9BZL1.1	PF00240	ubiquitin	70	8173.46	8.96	9	12	1159	17085	16960	9.26	94.57	-0.474	4
P04198.2	PF01056	Myc_N	364	37792	4.81	51	32	5239	28210	27960	76.15	62.88	-0.507	1	1.74	O14561	PF00550	PP-binding	68	7938.14	4.07	17	6	1114	4470	4470	24.14	110.29	-0.06	5
P04198.2	PF00010	HLH	53	6377.37	10.93	6	13	920	1490	0	102.69	99.25	-0.925	1	1.74	O14561	PF00550	PP-binding	68	7938.14	4.07	17	6	1114	4470	4470	24.14	110.29	-0.06	5
Q9NV56.1	PF07904	Eaf7	145	16551.8	5.65	27	21	2296	7115	6990	57.2	68.48	-0.737	1	1.74	O75880	PF02630	SCO1-SenC	137	15595.5	4.35	27	12	2174	17545	17420	26.02	84.6	-0.363	5
P06746.3	PF14716	HHH_8	67	7289.42	9.48	7	11	1045	4470	0	12.65	86.12	-0.376	4	1.74	Q9NVV4	PF17797	RL	71	8401.46	7.02	8	8	1161	4595	4470	45.54	64.51	-0.632	9
P06746.3	PF10391	DNA_pol_lambd_f	50	5761.5	8.35	8	9	813	1490	0	7.5	78	-0.762	1	1.74	Q9NVV4	PF17797	RL	71	8401.46	7.02	8	8	1161	4595	4470	45.54	64.51	-0.632	9
P06746.3	PF14792	DNA_pol_B_palm	114	13127.1	7.09	17	17	1855	3105	2980	38.9	82.81	-0.578	1	1.74	Q9NVV4	PF17797	RL	71	8401.46	7.02	8	8	1161	4595	4470	45.54	64.51	-0.632	9
P06746.3	PF14791	DNA_pol_B_thumb	67	7695.69	5.72	10	9	1078	11460	0	26.16	74.18	-0.549	4	1.74	Q9NVV4	PF17797	RL	71	8401.46	7.02	8	8	1161	4595	4470	45.54	64.51	-0.632	9
P06746.3	PF14716	HHH_8	67	7289.42	9.48	7	11	1045	4470	0	12.65	86.12	-0.376	4	1.74	Q9NVV4	PF03828	PAP_assoc	49	5800.48	4.77	7	5	810	2980	0	42.8	73.67	-0.635	8
P06746.3	PF10391	DNA_pol_lambd_f	50	5761.5	8.35	8	9	813	1490	0	7.5	78	-0.762	1	1.74	Q9NVV4	PF03828	PAP_assoc	49	5800.48	4.77	7	5	810	2980	0	42.8	73.67	-0.635	8
P06746.3	PF14792	DNA_pol_B_palm	114	13127.1	7.09	17	17	1855	3105	2980	38.9	82.81	-0.578	1	1.74	Q9NVV4	PF03828	PAP_assoc	49	5800.48	4.77	7	5	810	2980	0	42.8	73.67	-0.635	8
P06746.3	PF14791	DNA_pol_B_thumb	67	7695.69	5.72	10	9	1078	11460	0	26.16	74.18	-0.549	4	1.74	Q9NVV4	PF03828	PAP_assoc	49	5800.48	4.77	7	5	810	2980	0	42.8	73.67	-0.635	8
Q53GS9.2	PF02148	zf-UBP	64	7317.45	7.9	3	4	1019	7700	7450	42.33	103.59	0.252	1	1.74	Q9NY74	PF15350	ETAA1	572	64274.3	5.04	85	68	8908	52535	51910	48.91	65.51	-0.828	4
Q53GS9.2	PF00443	UCH	328	38196.2	8.56	37	40	5424	42985	42860	39.46	92.1	-0.359	1	1.74	Q9NY74	PF15350	ETAA1	572	64274.3	5.04	85	68	8908	52535	51910	48.91	65.51	-0.828	4
Q01081.3	PF00642	zf-CCCH	27	3183.68	9.65	2	7	438	1615	1490	43.94	43.33	-0.956	1	1.74	P48200.4	PF00330	Aconitase	85	9381.74	4.68	12	7	1311	5625	5500	52.83	82.59	-0.144	4
Q01081.3	PF00076	RRM_1	59	6986.69	4.41	15	6	952	8480	8480	56.59	70.85	-0.812	1	1.74	P48200.4	PF00330	Aconitase	85	9381.74	4.68	12	7	1311	5625	5500	52.83	82.59	-0.144	4
Q13610.1	PF00400	WD40	40	4283.76	5.47	5	4	603	11000	0	31.83	102.5	-0.165	1	1.74	O76031.2	PF07724	AAA_2	220	23822.2	5.72	29	26	3392	4595	4470	39.75	103.68	-0.161	5
Q13610.1	PF00400	WD40	40	4283.76	5.47	5	4	603	11000	0	31.83	102.5	-0.165	1	1.74	O76031.2	PF10431	ClpB_D2-small	85	9601.23	4.78	15	11	1376	1615	1490	22.25	113.53	-0.029	5
Q86XI2.1	PF12422	Condensin2nSMC	151	18015.2	9.8	14	25	2562	25565	25440	55.58	95.56	-0.268	1	1.74	Q9BXI3	PF06189	5-nucleotidase	273	30493.7	6.23	35	31	4283	19035	18910	41.16	87.25	-0.212	4
O60762.1	PF00535	Glycos_transf_2	172	19533.6	9.22	21	25	2794	22920	0	15.79	103.72	-0.277	6	1.74	Q9BPZ3.1	PF07145	PAM2	18	1940.27	9.7	1	3	283	0	0	15.34	91.67	-0.272	4
Q9H0W9	PF08925	DUF1907	284	31733.6	6.83	32	31	4452	22390	21890	45.67	78.91	-0.213	1	1.74	Q93088	PF02574	S-methyl_trans	292	32181.8	5.37	40	30	4508	31900	31400	39.13	85.86	-0.122	4
P03372.2	PF02159	Oest_recep	140	14893.4	5.28	12	9	2044	14900	0	51.08	55.21	-0.615	1	1.74	O75534.2	PF00313	CSD	65	7378.4	6.85	9	9	1041	3105	2980	23.04	89.85	-0.303	4
P03372.2	PF00105	zf-C4	70	8149.39	9.06	5	12	1095	14940	14440	63.62	36.29	-0.679	1	1.74	O75534.2	PF00313	CSD	65	7378.4	6.85	9	9	1041	3105	2980	23.04	89.85	-0.303	4
P03372.2	PF00104	Hormone_recep	200	22988.2	7.32	21	21	3265	19730	19480	39.36	110.65	0.079	1	1.74	O75534.2	PF00313	CSD	65	7378.4	6.85	9	9	1041	3105	2980	23.04	89.85	-0.303	4
P03372.2	PF12743	ESR1_C	44	4526.81	4.92	5	2	617	2980	0	50.19	51.14	-0.559	1	1.74	O75534.2	PF00313	CSD	65	7378.4	6.85	9	9	1041	3105	2980	23.04	89.85	-0.303	4
P03372.2	PF02159	Oest_recep	140	14893.4	5.28	12	9	2044	14900	0	51.08	55.21	-0.615	1	1.74	O75534.2	PF12901	SUZ-C	32	3470.97	6.16	4	4	487	0	0	32.47	79.38	-0.447	4
P03372.2	PF00105	zf-C4	70	8149.39	9.06	5	12	1095	14940	14440	63.62	36.29	-0.679	1	1.74	O75534.2	PF12901	SUZ-C	32	3470.97	6.16	4	4	487	0	0	32.47	79.38	-0.447	4
P03372.2	PF00104	Hormone_recep	200	22988.2	7.32	21	21	3265	19730	19480	39.36	110.65	0.079	1	1.74	O75534.2	PF12901	SUZ-C	32	3470.97	6.16	4	4	487	0	0	32.47	79.38	-0.447	4
P03372.2	PF12743	ESR1_C	44	4526.81	4.92	5	2	617	2980	0	50.19	51.14	-0.559	1	1.74	O75534.2	PF12901	SUZ-C	32	3470.97	6.16	4	4	487	0	0	32.47	79.38	-0.447	4
Q9NWT8.1	PF08213	DUF1713	33	4292.28	11.9	1	15	634	1490	1490	74.21	73.64	-1.497	9	1.74	P59103.2	PF15199	DAOA	82	9783.02	7.74	10	11	1342	18575	18450	63.28	54.76	-0.96	9
P12004.1	PF00705	PCNA_N	125	13947.9	4.47	21	12	1951	8605	8480	41.89	99.84	-0.126	5	1.74	P51398.1	PF10236	DAP3	296	34055.3	9.08	33	40	4833	53650	53400	43.21	93.24	-0.413	5
P12004.1	PF02747	PCNA_C	127	13909	5.12	16	12	1957	7575	7450	44.57	90.55	-0.013	1	1.74	P51398.1	PF10236	DAP3	296	34055.3	9.08	33	40	4833	53650	53400	43.21	93.24	-0.413	5
O95990.1	PF06625	DUF1151	111	13587.7	10.06	19	28	1949	5500	5500	76.04	83.42	-1.408	1	1.74	Q7RTR2	PF00620	RhoGAP	162	18428.2	5.79	24	19	2611	3230	2980	43.19	104.07	-0.307	4
P62487.1	PF03876	SHS2_Rpb7-N	70	7783.11	8.88	5	7	1118	5960	5960	23.1	104.29	0.234	1	1.74	P0C7P0	PF09360	zf-CDGSH	39	4396.22	9.82	2	8	625	7115	6990	50.22	72.31	-0.187	5
P62487.1	PF00575	S1	84	9442.78	4.64	14	9	1321	1615	1490	31.43	84.52	-0.235	1	1.74	P0C7P0	PF09360	zf-CDGSH	39	4396.22	9.82	2	8	625	7115	6990	50.22	72.31	-0.187	5
P49842.2	PF10494	Stk19	219	24407.3	8.64	23	26	3475	20190	19940	37.96	106.8	0.113	1	1.74	Q8WUN7	PF16455	UBD	105	12029.5	5.13	18	13	1668	22585	22460	50.17	69.9	-0.776	4
P49842.2	PF10494	Stk19	219	24407.3	8.64	23	26	3475	20190	19940	37.96	106.8	0.113	1	1.74	Q8WUN7	PF00240	ubiquitin	72	8367.82	10.2	8	14	1204	6990	0	51.22	89.17	-0.404	4
O96011.1	PF05648	PEX11	251	273377	9.79	18	31	3906	29950	29450	50.04	110.4	0.091	7	1.74	P28328.2	PF04757	Pex2_Pex12	200	23387.6	9.55	12	25	3328	47940	47440	42.15	99.9	0.098	7
O96011.1	PF05648	PEX11	251	273377	9.79	18	31	3906	29950	29450	50.04	110.4	0.091	7	1.74	P28328.2	PF00097	zf-C3HC4	40	4600.43	6.01	3	2	616	8855	8480	33.14	51.25	0.508	7
Q2M1K9.1	PF00096	zf-C2H2	23	2912.38	8.82	2	4	404	3105	2980	42.37	67.83	-0.687	1	1.74	Q06278	PF00111	Fer2	71	7908.44	9.77	3	12	1124	6210	5960	55.16	86.48	-0.154	4
Q2M1K9.1	PF00096	zf-C2H2	23	2912.38	8.82	2	4	404	3105	2980	42.37	67.83	-0.687	1	1.74	Q06278	PF01799	Fer2_2	75	8198.47	7.59	6	7	1136	3355	2980	40.5	78	-0.185	4
Q2M1K9.1	PF00096	zf-C2H2	23	2912.38	8.82	2	4	404	3105	2980	42.37	67.83	-0.687	1	1.74	Q06278	PF00941	FAD_binding_5	185	20397.8	7.94	17	18	2913	11585	11460	41.34	104.81	-0.011	4
Q2M1K9.1	PF00096	zf-C2H2	23	2912.38	8.82	2	4	404	3105	2980	42.37	67.83	-0.687	1	1.74	Q06278	PF03450	CO_deh_flav_C	105	11625.6	8.82	9	12	1648	8730	8480	30.65	102.19	0.2	4
Q2M1K9.1	PF00096	zf-C2H2	23	2912.38	8.82	2	4	404	3105	2980	42.37	67.83	-0.687	1	1.74	Q06278	PF01315	Ald_Xan_dh_C	108	11895.7	4.52	17	9	1670	3230	2980	26.52	100.19	0.316	4
Q2M1K9.1	PF00096	zf-C2H2	23	2912.38	8.82	2	4	404	3105	2980	42.37	67.83	-0.687	1	1.74	Q06278	PF02738	Ald_Xan_dh_C2	539	59630.5	6.27	62	57	8336	63550	62800	43.03	83.41	-0.19	4
Q2M1K9.1	PF13912	zf-C2H2_6	27	3195.68	7.84	2	3	442	1615	1490	37.42	82.96	-0.667	1	1.74	Q06278	PF00111	Fer2	71	7908.44	9.77	3	12	1124	6210	5960	55.16	86.48	-0.154	4
Q2M1K9.1	PF13912	zf-C2H2_6	27	3195.68	7.84	2	3	442	1615	1490	37.42	82.96	-0.667	1	1.74	Q06278	PF01799	Fer2_2	75	8198.47	7.59	6	7	1136	3355	2980	40.5	78	-0.185	4
Q2M1K9.1	PF13912	zf-C2H2_6	27	3195.68	7.84	2	3	442	1615	1490	37.42	82.96	-0.667	1	1.74	Q06278	PF00941	FAD_binding_5	185	20397.8	7.94	17	18	2913	11585	11460	41.34	104.81	-0.011	4
Q2M1K9.1	PF13912	zf-C2H2_6	27	3195.68	7.84	2	3	442	1615	1490	37.42	82.96	-0.667	1	1.74	Q06278	PF03450	CO_deh_flav_C	105	11625.6	8.82	9	12	1648	8730	8480	30.65	102.19	0.2	4
Q2M1K9.1	PF13912	zf-C2H2_6	27	3195.68	7.84	2	3	442	1615	1490	37.42	82.96	-0.667	1	1.74	Q06278	PF01315	Ald_Xan_dh_C	108	11895.7	4.52	17	9	1670	3230	2980	26.52	100.19	0.316	4
Q2M1K9.1	PF13912	zf-C2H2_6	27	3195.68	7.84	2	3	442	1615	1490	37.42	82.96	-0.667	1	1.74	Q06278	PF02738	Ald_Xan_dh_C2	539	59630.5	6.27	62	57	8336	63550	62800	43.03	83.41	-0.19	4
Q9UNI6.1	PF00782	DSPc	135	14912.2	5.33	19	14	2108	15595	15470	35.54	95.48	0.011	1	1.74	P48735.2	PF00180	Iso_dh	398	44904.4	7.29	50	50	6296	62255	61880	22.4	79.12	-0.339	5
Q9UNI6.1	PF00782	DSPc	135	14912.2	5.33	19	14	2108	15595	15470	35.54	95.48	0.011	1	1.74	P48735.2	PF00180	Iso_dh	398	44904.4	7.29	50	50	6296	62255	61880	22.4	79.12	-0.339	5
Q16656.1	PF10491	Nrf1_DNA-bind	209	23575.2	9.71	22	33	3348	35075	34950	44.15	79.81	-0.517	1	1.74	O00411.2	PF14700	RPOL_N	294	33453.9	8.6	31	35	4752	34420	33920	39.67	95.17	-0.258	5
Q16656.1	PF10492	Nrf1_activ_bdg	55	5702.51	3.92	4	1	805	1490	0	22.3	102.55	0.358	1	1.74	O00411.2	PF14700	RPOL_N	294	33453.9	8.6	31	35	4752	34420	33920	39.67	95.17	-0.258	5
Q16656.1	PF10491	Nrf1_DNA-bind	209	23575.2	9.71	22	33	3348	35075	34950	44.15	79.81	-0.517	1	1.74	O00411.2	PF00940	RNA_pol	400	45341	8.97	41	48	6368	60765	60390	46.6	84.75	-0.3	5
Q16656.1	PF10492	Nrf1_activ_bdg	55	5702.51	3.92	4	1	805	1490	0	22.3	102.55	0.358	1	1.74	O00411.2	PF00940	RNA_pol	400	45341	8.97	41	48	6368	60765	60390	46.6	84.75	-0.3	5
P20290	PF01849	NAC	57	6246.11	9.31	4	6	885	0	0	20	82.11	-0.321	1	1.74	P06132.2	PF01208	URO-D	347	38590.1	5.77	41	34	5429	44265	43890	48.53	90	-0.096	4
P51946.1	PF00134	Cyclin_N	129	14998.6	6.99	14	14	2114	9315	8940	50.27	94.42	0.027	1	1.74	P48200.4	PF00330	Aconitase	85	9381.74	4.68	12	7	1311	5625	5500	52.83	82.59	-0.144	4
P51946.1	PF00134	Cyclin_N	129	14998.6	6.99	14	14	2114	9315	8940	50.27	94.42	0.027	1	1.74	P48200.4	PF00330	Aconitase	85	9381.74	4.68	12	7	1311	5625	5500	52.83	82.59	-0.144	4
P16383.2	PF07842	GCFC	218	25424.5	7.02	29	29	3630	39085	38960	39.26	102.34	-0.255	1	1.74	Q6P1L8	PF00238	Ribosomal_L14	115	12687.9	10.38	7	20	1821	4595	4470	23.3	90.61	-0.359	5
O96019.1	PF00022	Actin	422	46809.2	5.39	51	40	6510	54360	53860	44.57	77.61	-0.279	1	1.74	Q7RTR2	PF00620	RhoGAP	162	18428.2	5.79	24	19	2611	3230	2980	43.19	104.07	-0.307	4
O60583.2	PF00134	Cyclin_N	140	16221.7	6.98	15	15	2287	10220	9970	66.61	94.79	-0.94	1	1.74	O14618.1	PF00403	HMA	58	6310.15	4.54	8	3	880	125	0	41.97	97.24	-0.002	3
O60583.2	PF00134	Cyclin_N	140	16221.7	6.98	15	15	2287	10220	9970	66.61	94.79	-0.94	1	1.74	O14618.1	PF00080	Sod_Cu	138	14731.3	5.06	21	12	2027	7240	6990	24.16	83.33	-0.493	4
Q9C0J8.2	PF00400	WD40	39	4461.97	5.53	6	5	607	5500	5500	36.42	45.13	-0.692	1	1.74	Q13405	PF05046	Img2	85	9946.56	9.4	10	13	1420	15470	0	47.32	93.88	-0.372	5
Q96BP2	PF06747	CHCH	35	4100.76	5	6	5	553	5750	5500	74.62	53.14	-0.289	1	1.74	P31350.1	PF00268	Ribonuc_red_sm	268	31402.3	5.31	41	31	4409	45170	44920	41.17	89.89	-0.053	4
O75506.1	PF06825	HSBP1	51	5786.51	4.04	9	4	805	0	0	54.07	91.76	-0.445	1	1.74	Q96RP9	PF00009	GTP_EFTU	276	30871.7	7.2	34	34	4372	16055	15930	41.66	96.81	-0.148	5
O75506.1	PF06825	HSBP1	51	5786.51	4.04	9	4	805	0	0	54.07	91.76	-0.445	1	1.74	Q96RP9	PF03144	GTP_EFTU_D2	67	7637.68	6.77	10	10	1060	6085	5960	28.17	71.34	-0.501	5
O75506.1	PF06825	HSBP1	51	5786.51	4.04	9	4	805	0	0	54.07	91.76	-0.445	1	1.74	Q96RP9	PF14492	EFG_II	75	8539.76	5.8	12	11	1197	4595	4470	24.78	70.13	-0.572	5
O75506.1	PF06825	HSBP1	51	5786.51	4.04	9	4	805	0	0	54.07	91.76	-0.445	1	1.74	Q96RP9	PF03764	EFG_IV	122	13159.9	5.78	16	13	1849	2980	2980	42.82	75.98	-0.297	5
O75506.1	PF06825	HSBP1	51	5786.51	4.04	9	4	805	0	0	54.07	91.76	-0.445	1	1.74	Q96RP9	PF00679	EFG_C	88	9858.02	4.2	14	5	1351	9065	8940	57.88	75.23	-0.28	5
P27694.2	PF04057	Rep-A_N	100	11121.1	8.02	9	10	1596	1615	1490	39.83	117.9	0.118	4	1.74	Q6XE24	PF00076	RRM_1	66	7042.1	9.04	5	8	1001	4595	4470	9.39	87.27	-0.218	1
P27694.2	PF01336	tRNA_anti-codon	90	10394.7	8.05	11	12	1455	15470	15470	17.43	71.44	-0.471	1	1.74	Q6XE24	PF00076	RRM_1	66	7042.1	9.04	5	8	1001	4595	4470	9.39	87.27	-0.218	1
P27694.2	PF16900	REPA_OB_2	98	10637	6.43	14	14	1505	8480	8480	37.88	94.49	-0.271	1	1.74	Q6XE24	PF00076	RRM_1	66	7042.1	9.04	5	8	1001	4595	4470	9.39	87.27	-0.218	1
P27694.2	PF08646	Rep_fac-A_C	146	17255.5	5.63	21	20	2384	19285	18910	34.44	67.4	-0.576	1	1.74	Q6XE24	PF00076	RRM_1	66	7042.1	9.04	5	8	1001	4595	4470	9.39	87.27	-0.218	1
Q9UBU7.1	PF07535	zf-DBF	44	5232.89	6.06	7	6	723	4595	4470	36.06	75.23	-0.877	1	1.74	P51553.1	PF00180	Iso_dh	327	35878.2	7.69	33	34	5050	12295	11920	45.23	94.8	-0.13	5
P17900.4	PF02221	E1_DerP2_DerF2	158	17203.9	4.65	20	12	2421	22960	22460	43.46	96.14	0.114	8	1.74	Q9P0J6	PF00444	Ribosomal_L36	38	4883.89	10.61	1	14	696	10095	9970	71.97	43.42	-1.432	5
Q8WUA4.2	PF00400	WD40	43	5056.84	9.24	3	6	707	12615	12490	8.91	77.21	-0.214	1	1.74	Q14749.3	PF13649	Methyltransf_25	111	12197.8	4.92	18	12	1690	18115	17990	59.07	81.71	-0.216	4
Q00577.2	PF04845	PurA	221	25259.7	9.17	29	34	3552	20400	20400	46.75	74.12	-0.604	1	1.74	Q9NVV4	PF17797	RL	71	8401.46	7.02	8	8	1161	4595	4470	45.54	64.51	-0.632	9
Q00577.2	PF04845	PurA	221	25259.7	9.17	29	34	3552	20400	20400	46.75	74.12	-0.604	1	1.74	Q9NVV4	PF03828	PAP_assoc	49	5800.48	4.77	7	5	810	2980	0	42.8	73.67	-0.635	8
Q8N807.2	PF00085	Thioredoxin	107	11829.9	9.25	11	14	1699	5500	5500	52.67	100.19	-0.048	6	1.74	Q8N427	PF00085	Thioredoxin	105	11968.9	5.31	13	11	1698	12615	12490	36.95	105.81	-0.108	4
Q8N807.2	PF13848	Thioredoxin_6	185	21554.8	5.99	27	24	3069	10430	0	44.78	103.14	-0.203	6	1.74	Q8N427	PF00085	Thioredoxin	105	11968.9	5.31	13	11	1698	12615	12490	36.95	105.81	-0.108	4
Q8N807.2	PF00085	Thioredoxin	107	11829.9	9.25	11	14	1699	5500	5500	52.67	100.19	-0.048	6	1.74	Q8N427	PF00334	NDK	84	9463.91	6.12	11	10	1350	4470	4470	46.29	98.57	-0.015	4
Q8N807.2	PF13848	Thioredoxin_6	185	21554.8	5.99	27	24	3069	10430	0	44.78	103.14	-0.203	6	1.74	Q8N427	PF00334	NDK	84	9463.91	6.12	11	10	1350	4470	4470	46.29	98.57	-0.015	4
O95926	PF08231	SYF2	149	17960	8.06	31	32	2508	18910	0	50.45	59.66	-1.385	1	1.74	P0C7P0	PF09360	zf-CDGSH	39	4396.22	9.82	2	8	625	7115	6990	50.22	72.31	-0.187	5
Q9BTP7.2	PF17949	PND	124	13961.4	8.92	11	14	1994	11585	11460	37.22	109.92	0.098	1	1.74	P40925.4	PF00056	Ldh_1_N	149	15933.8	8.54	16	18	2300	4595	4470	17.82	114.5	0.25	4
Q9BTP7.2	PF12826	HHH_2	54	5839.78	9.7	2	4	0	0	844	33.73	106.48	0.054	1	1.74	P40925.4	PF00056	Ldh_1_N	149	15933.8	8.54	16	18	2300	4595	4470	17.82	114.5	0.25	4
Q9BTP7.2	PF17949	PND	124	13961.4	8.92	11	14	1994	11585	11460	37.22	109.92	0.098	1	1.74	P40925.4	PF02866	Ldh_1_C	176	19604.3	6.4	24	23	2765	27960	27960	20.94	85.28	-0.308	4
Q9BTP7.2	PF12826	HHH_2	54	5839.78	9.7	2	4	0	0	844	33.73	106.48	0.054	1	1.74	P40925.4	PF02866	Ldh_1_C	176	19604.3	6.4	24	23	2765	27960	27960	20.94	85.28	-0.308	4
Q9NVU0.1	PF04801	Sin_N	428	48820.8	6.36	59	55	6852	57215	56840	51.71	81.99	-0.498	1	1.74	Q9UD71.2	PF05395	DARPP-32	180	20444.1	4.57	45	23	2797	8605	8480	87.74	52.61	-1.42	1
P18074.1	PF06733	DEAD_2	185	21315.5	7.21	24	24	3000	22265	21890	52.23	95.35	-0.275	1	1.74	Q9BYC8	PF01783	Ribosomal_L32p	58	6796.99	9.5	6	14	959	3355	2980	71.74	72.24	-0.883	5
P18074.1	PF06777	HBB	145	16604.2	8.71	19	21	2375	10095	9970	45.13	106.97	-0.186	1	1.74	Q9BYC8	PF01783	Ribosomal_L32p	58	6796.99	9.5	6	14	959	3355	2980	71.74	72.24	-0.883	5
P18074.1	PF13307	Helicase_C_2	177	20311.2	7.95	22	23	2848	24535	24410	35.19	85.42	-0.249	1	1.74	Q9BYC8	PF01783	Ribosomal_L32p	58	6796.99	9.5	6	14	959	3355	2980	71.74	72.24	-0.883	5
Q9UIF7.1	PF00730	HhH-GPD	137	14861.9	8.09	10	11	2093	29450	29450	42.94	94.67	-0.069	1	1.74	Q9H6S1.1	PF12845	TBD	53	5960.85	7.79	6	7	837	7115	6990	38.51	84.72	-0.421	4
Q9UIF7.1	PF00633	HHH	31	3208.68	6.86	2	2	456	1490	0	37.69	97.74	0.061	1	1.74	Q9H6S1.1	PF12845	TBD	53	5960.85	7.79	6	7	837	7115	6990	38.51	84.72	-0.421	4
Q9UIF7.1	PF14815	NUDIX_4	124	13746.9	8.2	9	10	1958	24980	24980	53.79	98.31	-0.03	1	1.74	Q9H6S1.1	PF12845	TBD	53	5960.85	7.79	6	7	837	7115	6990	38.51	84.72	-0.421	4
P13686.3	PF00149	Metallophos	219	24833.3	8.44	21	23	3482	39545	39420	39.18	87.72	-0.197	3	1.74	P14324.4	PF00348	polyprenyl_synt	267	30666.3	5.19	36	31	4330	47705	47330	38.32	98.28	-0.193	4
P50897	PF02089	Palm_thioest	256	28652.9	6.36	28	26	4011	28795	28420	30.93	84.88	-0.234	8	1.74	Q96Q11	PF01743	PolyA_pol	124	14184.9	5.6	20	17	1977	8480	0	22.57	71.61	-0.62	5
P50897	PF02089	Palm_thioest	256	28652.9	6.36	28	26	4011	28795	28420	30.93	84.88	-0.234	8	1.74	Q96Q11	PF12627	PolyA_pol_RNAbd	58	6352.3	5.33	8	4	909	8480	0	20.77	131.21	0.116	5
Q5U623.2	PF16788	ATF7IP_BD	210	23592.8	9.04	26	31	3335	4595	4470	44.29	84	-0.733	1	1.74	P49915.1	PF00117	GATase	182	19926	6.35	21	20	2827	13075	12950	30.61	96.87	0.071	4
Q5U623.2	PF16788	ATF7IP_BD	210	23592.8	9.04	26	31	3335	4595	4470	44.29	84	-0.733	1	1.74	P49915.1	PF02540	NAD_synthase	121	13590.6	9.47	15	20	1944	1615	1490	42.83	95.79	-0.445	4
Q5U623.2	PF16788	ATF7IP_BD	210	23592.8	9.04	26	31	3335	4595	4470	44.29	84	-0.733	1	1.74	P49915.1	PF00958	GMP_synt_C	96	10726.6	8.9	9	11	1534	8480	8480	60.75	92.29	-0.121	4
Q5U623.2	PF16794	fn3_4	100	11526.6	9.66	6	15	1644	17210	16960	51.19	86.8	-0.254	1	1.74	P49915.1	PF00117	GATase	182	19926	6.35	21	20	2827	13075	12950	30.61	96.87	0.071	4
Q5U623.2	PF16794	fn3_4	100	11526.6	9.66	6	15	1644	17210	16960	51.19	86.8	-0.254	1	1.74	P49915.1	PF02540	NAD_synthase	121	13590.6	9.47	15	20	1944	1615	1490	42.83	95.79	-0.445	4
Q5U623.2	PF16794	fn3_4	100	11526.6	9.66	6	15	1644	17210	16960	51.19	86.8	-0.254	1	1.74	P49915.1	PF00958	GMP_synt_C	96	10726.6	8.9	9	11	1534	8480	8480	60.75	92.29	-0.121	4
Q16514.1	PF03847	TFIID_20kDa	68	7977.03	4.72	15	9	1122	5500	5500	50.2	98.82	-0.625	1	1.74	Q9UD71.2	PF05395	DARPP-32	180	20444.1	4.57	45	23	2797	8605	8480	87.74	52.61	-1.42	1
Q9H0W9	PF08925	DUF1907	284	31733.6	6.83	32	31	4452	22390	21890	45.67	78.91	-0.213	1	1.74	Q9Y3D9	PF10484	MRP-S23	128	14912	9.24	18	22	2107	19940	19940	28.29	74.61	-0.55	5
P18074.1	PF06733	DEAD_2	185	21315.5	7.21	24	24	3000	22265	21890	52.23	95.35	-0.275	1	1.74	Q9NX18.1	PF03937	Sdh5	74	8884.22	5.28	12	9	1247	16960	16960	47.35	96.35	-0.468	5
P18074.1	PF06777	HBB	145	16604.2	8.71	19	21	2375	10095	9970	45.13	106.97	-0.186	1	1.74	Q9NX18.1	PF03937	Sdh5	74	8884.22	5.28	12	9	1247	16960	16960	47.35	96.35	-0.468	5
P18074.1	PF13307	Helicase_C_2	177	20311.2	7.95	22	23	2848	24535	24410	35.19	85.42	-0.249	1	1.74	Q9NX18.1	PF03937	Sdh5	74	8884.22	5.28	12	9	1247	16960	16960	47.35	96.35	-0.468	5
Q9Y618	PF15784	GPS2_interact	89	10115.6	5.41	16	13	1450	0	0	81.49	83.15	-0.97	1	1.74	Q8N4X5.1	PF00169	PH	103	11965.1	9.68	11	19	1717	23615	23490	41.29	103.11	-0.418	4
Q9Y618	PF00249	Myb_DNA-binding	46	5400.11	9.36	5	8	745	13980	13980	44.91	44.57	-0.904	1	1.74	Q8N4X5.1	PF00169	PH	103	11965.1	9.68	11	19	1717	23615	23490	41.29	103.11	-0.418	4
O00311.1	PF00069	Pkinase	164	18777.7	7.96	19	20	2669	9065	8940	36.25	99.27	-0.162	1	1.74	Q07617.3	PF00515	TPR_1	34	3853.37	4.44	5	3	526	3230	2980	25.84	83.53	-0.271	4
O00311.1	PF00069	Pkinase	164	18777.7	7.96	19	20	2669	9065	8940	36.25	99.27	-0.162	1	1.74	Q07617.3	PF13877	RPAP3_C	93	10578.5	9.3	9	13	1525	4470	4470	26.31	107.1	-0.173	4
Q9HAN9.1	PF01467	CTP_transf_like	218	24946.6	9.26	26	34	3527	47690	47440	38.92	84.08	-0.567	1	1.74	P48200.4	PF00330	Aconitase	85	9381.74	4.68	12	7	1311	5625	5500	52.83	82.59	-0.144	4
Q9HAN9.1	PF01467	CTP_transf_like	218	24946.6	9.26	26	34	3527	47690	47440	38.92	84.08	-0.567	1	1.74	P48200.4	PF00694	Aconitase_C	130	14204.5	9.8	10	18	2031	14440	0	22.19	88.69	-0.213	4
P19447.1	PF13625	Helicase_C_3	128	14639	7.86	13	14	2075	17670	17420	48.6	101.95	0.01	1	1.74	P32929.3	PF01053	Cys_Met_Meta_PP	377	41462.7	6.17	40	34	5836	32025	31400	32.54	94.67	-0.024	4
P19447.1	PF04851	ResIII	160	17846	9.83	12	24	2534	30855	30480	35.42	88.94	-0.024	1	1.74	P32929.3	PF01053	Cys_Met_Meta_PP	377	41462.7	6.17	40	34	5836	32025	31400	32.54	94.67	-0.024	4
P19447.1	PF16203	ERCC3_RAD25_C	247	28467.5	9.1	29	35	4006	22015	21890	48.05	79.39	-0.46	1	1.74	P32929.3	PF01053	Cys_Met_Meta_PP	377	41462.7	6.17	40	34	5836	32025	31400	32.54	94.67	-0.024	4
P13284	PF03227	GILT	104	12138.1	4.3	18	7	1683	17335	16960	54.58	98.37	0.127	3	1.74	Q9Y676.1	PF01084	Ribosomal_S18	53	6143.23	9.7	3	8	878	3105	2980	25.38	101.13	-0.125	5
Q9UM82.2	PF07535	zf-DBF	43	5104.72	5.46	7	5	702	4595	4470	36.67	76.98	-0.807	1	1.74	Q6WQI6	PF00400	WD40	39	4225.88	9.36	3	6	601	8480	8480	18.91	82.56	-0.177	1
Q15583.3	PF05920	Homeobox_KN	40	4951.56	9.11	3	5	685	15470	15470	71.47	73.25	-0.9	1	1.74	Q9Y3B7	PF03946	Ribosomal_L11_N	67	7307.68	10.28	6	12	1063	0	0	18.97	94.48	-0.222	5
Q15583.3	PF05920	Homeobox_KN	40	4951.56	9.11	3	5	685	15470	15470	71.47	73.25	-0.9	1	1.74	Q9Y3B7	PF00298	Ribosomal_L11	73	7737.97	9.87	6	10	1121	2980	0	37.16	109.59	0.155	5
Q8N9N5	PF10523	BEN	70	8205.51	9.47	6	11	1159	17085	16960	35.71	85	-0.411	1	1.74	Q9GZZ1	PF00583	Acetyltransf_1	116	13434.6	8.92	11	15	1895	10680	10430	41.41	98.28	-0.127	4
P38571	PF00561	Abhydrolase_1	302	34223	6.17	26	21	4762	75650	75400	39.97	84.9	-0.029	3	1.74	Q9BXI3	PF06189	5-nucleotidase	273	30493.7	6.23	35	31	4283	19035	18910	41.16	87.25	-0.212	4
Q9UHR5.1	PF07818	HCNGP	95	11326	6.16	17	16	1582	14565	14440	27.1	65.79	-1.012	1	1.74	P54136.2	PF03485	Arg_tRNA_synt_N	89	9901.31	5.85	11	9	1393	3105	2980	43.79	85.51	-0.434	4
Q9UHR5.1	PF07818	HCNGP	95	11326	6.16	17	16	1582	14565	14440	27.1	65.79	-1.012	1	1.74	P54136.2	PF00750	tRNA-synt_1d	347	39439.2	6.05	50	46	5566	36120	35870	35.29	90.4	-0.267	4
Q9UHR5.1	PF07818	HCNGP	95	11326	6.16	17	16	1582	14565	14440	27.1	65.79	-1.012	1	1.74	P54136.2	PF05746	DALR_1	127	14937.7	7.78	18	19	2130	18700	18450	46.44	109.13	0.069	4
Q9Y5Q9.1	PF13181	TPR_8	31	3704.27	6.25	4	4	520	8480	8480	46.07	81.94	-0.461	1	1.74	Q9Y2R5	PF00366	Ribosomal_S17	69	7916.47	10.15	5	14	1155	4470	4470	31.37	104.49	-0.21	5
Q15393.4	PF10433	MMS1_N	517	57633.4	4.71	78	46	8049	36955	36330	39.98	88.96	-0.146	1	1.74	Q9Y2Q9	PF10246	MRP-S35	106	11803.6	8.32	14	15	1675	3105	2980	32.7	93.71	-0.262	5
Q15393.4	PF03178	CPSF_A	322	35996	5.82	38	31	5066	40130	39880	32.03	96.77	-0.137	1	1.74	Q9Y2Q9	PF10246	MRP-S35	106	11803.6	8.32	14	15	1675	3105	2980	32.7	93.71	-0.262	5
Q969F1	PF10419	TFIIIC_sub6	96	10860.3	4.52	20	10	1516	3230	2980	38.12	91.25	-0.291	1	1.74	O14920.1	PF00069	Pkinase	283	32749.5	6.43	33	31	4589	57785	57410	44.09	89.89	-0.447	7
Q969F1	PF10419	TFIIIC_sub6	96	10860.3	4.52	20	10	1516	3230	2980	38.12	91.25	-0.291	1	1.74	O14920.1	PF18397	IKBKB_SDD	278	32584.8	9.14	39	47	4626	28335	27960	53.28	89.03	-0.612	1
Q969F1	PF10419	TFIIIC_sub6	96	10860.3	4.52	20	10	1516	3230	2980	38.12	91.25	-0.291	1	1.74	O14920.1	PF12179	IKKbetaNEMObind	37	4289.7	3.89	8	1	589	11000	11000	58.22	100.27	-0.284	9
P09884.2	PF12254	DNA_pol_alpha_N	62	7338.93	4.18	20	9	1008	12950	0	20.62	70.65	-1.084	1	1.74	Q9H2W6	PF11788	MRP-L46	109	12811.5	4.85	23	16	1811	12490	12490	60.53	98.53	-0.769	5
P09884.2	PF03104	DNA_pol_B_exo1	343	38955.7	8.91	40	49	5525	30535	29910	36.31	85.51	-0.229	1	1.74	Q9H2W6	PF11788	MRP-L46	109	12811.5	4.85	23	16	1811	12490	12490	60.53	98.53	-0.769	5
P09884.2	PF00136	DNA_pol_B	454	51799.5	7.68	61	62	7356	41050	40800	48.21	95.09	-0.437	1	1.74	Q9H2W6	PF11788	MRP-L46	109	12811.5	4.85	23	16	1811	12490	12490	60.53	98.53	-0.769	5
P09884.2	PF08996	zf-DNA_Pol	191	22399.7	8.23	26	29	3110	22640	21890	50.97	64.87	-0.631	1	1.74	Q9H2W6	PF11788	MRP-L46	109	12811.5	4.85	23	16	1811	12490	12490	60.53	98.53	-0.769	5
Q99967.2	PF04487	CITED	270	28496.6	6.42	17	11	3834	11585	11460	51.33	46.33	-0.6	1	1.74	Q7L3B6.1	PF08565	CDC37_M	111	13154.1	6.09	16	14	1817	17210	16960	37.55	67.75	-0.379	4
Q8TAE8.1	PF10147	CR6_interact	211	24414.9	10.11	29	42	3444	40450	40450	75.12	66.35	-1.046	5	1.74	P49914.2	PF01812	5-FTHF_cyc-lig	189	22034.3	8.4	28	30	3110	16055	15930	60.08	85.61	-0.601	4
Q6PL18	PF00004	AAA	136	15212.5	7.93	17	18	2142	8605	8480	51.81	91.1	-0.122	4	1.74	P49914.2	PF01812	5-FTHF_cyc-lig	189	22034.3	8.4	28	30	3110	16055	15930	60.08	85.61	-0.601	4
Q6PL18	PF17862	AAA_lid_3	60	6691.58	4.5	10	6	931	4720	4470	47.41	94.5	-0.085	1	1.74	P49914.2	PF01812	5-FTHF_cyc-lig	189	22034.3	8.4	28	30	3110	16055	15930	60.08	85.61	-0.601	4
Q6PL18	PF00439	Bromodomain	82	9584.03	6.08	14	13	1366	5960	5960	21.08	106.83	-0.398	1	1.74	P49914.2	PF01812	5-FTHF_cyc-lig	189	22034.3	8.4	28	30	3110	16055	15930	60.08	85.61	-0.601	4
P09012.3	PF00076	RRM_1	72	8377.86	9.92	6	12	1202	4470	0	41.57	93.47	-0.172	1	1.74	O60239.2	PF05276	SH3BP5	231	27021.8	9.28	41	47	3829	19940	0	44.75	76.54	-0.977	5
O94906.1	PF06424	PRP1_N	157	17912.5	4.71	38	27	2459	14440	0	48.4	50.45	-1.359	1	1.74	Q9Y2J8	PF08526	PAD_N	114	12718.2	4.92	15	10	1773	25440	0	42.64	82.89	-0.282	4
O94906.1	PF14559	TPR_19	56	6167.94	5.23	8	7	871	12490	0	73.03	94.46	-0.302	1	1.74	Q9Y2J8	PF08526	PAD_N	114	12718.2	4.92	15	10	1773	25440	0	42.64	82.89	-0.282	4
O94906.1	PF13181	TPR_8	31	3757.48	8.94	5	7	526	6990	6990	49.56	44.19	-1.232	1	1.74	Q9Y2J8	PF08526	PAD_N	114	12718.2	4.92	15	10	1773	25440	0	42.64	82.89	-0.282	4
O94906.1	PF06424	PRP1_N	157	17912.5	4.71	38	27	2459	14440	0	48.4	50.45	-1.359	1	1.74	Q9Y2J8	PF08527	PAD_M	159	18048.6	4.99	26	19	2532	27055	26930	35.87	90	-0.276	4
O94906.1	PF14559	TPR_19	56	6167.94	5.23	8	7	871	12490	0	73.03	94.46	-0.302	1	1.74	Q9Y2J8	PF08527	PAD_M	159	18048.6	4.99	26	19	2532	27055	26930	35.87	90	-0.276	4
O94906.1	PF13181	TPR_8	31	3757.48	8.94	5	7	526	6990	6990	49.56	44.19	-1.232	1	1.74	Q9Y2J8	PF08527	PAD_M	159	18048.6	4.99	26	19	2532	27055	26930	35.87	90	-0.276	4
O94906.1	PF06424	PRP1_N	157	17912.5	4.71	38	27	2459	14440	0	48.4	50.45	-1.359	1	1.74	Q9Y2J8	PF03068	PAD	379	43401.5	6.13	49	45	6124	47035	46410	47.99	89.92	-0.123	3
O94906.1	PF14559	TPR_19	56	6167.94	5.23	8	7	871	12490	0	73.03	94.46	-0.302	1	1.74	Q9Y2J8	PF03068	PAD	379	43401.5	6.13	49	45	6124	47035	46410	47.99	89.92	-0.123	3
O94906.1	PF13181	TPR_8	31	3757.48	8.94	5	7	526	6990	6990	49.56	44.19	-1.232	1	1.74	Q9Y2J8	PF03068	PAD	379	43401.5	6.13	49	45	6124	47035	46410	47.99	89.92	-0.123	3
Q14181.2	PF08418	Pol_alpha_B_N	217	23634.7	6.67	25	24	3315	13200	12950	58.89	77.74	-0.408	1	1.74	Q8N3C0.3	PF00270	DEAD	180	20302.7	7.1	20	20	2912	11460	11460	29.53	113.67	0.051	1
Q14181.2	PF08418	Pol_alpha_B_N	217	23634.7	6.67	25	24	3315	13200	12950	58.89	77.74	-0.408	1	1.74	Q8N3C0.3	PF00271	Helicase_C	159	17866.7	9.67	12	19	2519	10095	9970	40.31	91.32	-0.099	4
Q14181.2	PF08418	Pol_alpha_B_N	217	23634.7	6.67	25	24	3315	13200	12950	58.89	77.74	-0.408	1	1.74	Q8N3C0.3	PF02889	Sec63	309	35744.1	5.95	40	34	5062	62005	61880	44.42	101.59	-0.156	1
Q14181.2	PF04042	DNA_pol_E_B	208	23538.8	4.85	27	15	3302	16640	16390	61.45	96.44	-0.044	1	1.74	Q8N3C0.3	PF00270	DEAD	180	20302.7	7.1	20	20	2912	11460	11460	29.53	113.67	0.051	1
Q14181.2	PF04042	DNA_pol_E_B	208	23538.8	4.85	27	15	3302	16640	16390	61.45	96.44	-0.044	1	1.74	Q8N3C0.3	PF00271	Helicase_C	159	17866.7	9.67	12	19	2519	10095	9970	40.31	91.32	-0.099	4
Q14181.2	PF04042	DNA_pol_E_B	208	23538.8	4.85	27	15	3302	16640	16390	61.45	96.44	-0.044	1	1.74	Q8N3C0.3	PF02889	Sec63	309	35744.1	5.95	40	34	5062	62005	61880	44.42	101.59	-0.156	1
P78549.2	PF00730	HhH-GPD	139	15216.7	9.99	11	18	2176	26470	0	43.14	96.91	-0.109	1	1.74	O60239.2	PF05276	SH3BP5	231	27021.8	9.28	41	47	3829	19940	0	44.75	76.54	-0.977	5
P78549.2	PF00633	HHH	30	2972.51	5.99	2	1	423	1490	0	50.91	110.67	0.717	5	1.74	O60239.2	PF05276	SH3BP5	231	27021.8	9.28	41	47	3829	19940	0	44.75	76.54	-0.977	5
P13284	PF03227	GILT	104	12138.1	4.3	18	7	1683	17335	16960	54.58	98.37	0.127	3	1.74	P26639.3	PF02789	Peptidase_M17_N	133	14391.2	4.93	22	16	2023	11585	11460	30.19	85.86	-0.444	4
P13284	PF03227	GILT	104	12138.1	4.3	18	7	1683	17335	16960	54.58	98.37	0.127	3	1.74	P26639.3	PF00883	Peptidase_M17	312	33706.8	8.25	31	33	4744	35200	34950	37.06	85.45	-0.103	4
Q9NWT8.1	PF08213	DUF1713	33	4292.28	11.9	1	15	634	1490	1490	74.21	73.64	-1.497	9	1.74	O15169.2	PF16646	AXIN1_TNKS_BD	73	7553.22	4.31	12	6	1039	2980	2980	49.08	50.82	-0.644	4
Q9NWT8.1	PF08213	DUF1713	33	4292.28	11.9	1	15	634	1490	1490	74.21	73.64	-1.497	9	1.74	O15169.2	PF00615	RGS	123	14225.3	5.4	18	16	1995	13200	12950	37.9	81.79	-0.385	4
Q9NWT8.1	PF08213	DUF1713	33	4292.28	11.9	1	15	634	1490	1490	74.21	73.64	-1.497	9	1.74	O15169.2	PF08833	Axin_b-cat_bind	58	6010.66	8.61	6	7	835	0	0	79.51	58.79	-0.888	4
Q9NWT8.1	PF08213	DUF1713	33	4292.28	11.9	1	15	634	1490	1490	74.21	73.64	-1.497	9	1.74	O15169.2	PF00778	DIX	80	9292.72	5.48	14	13	1319	9065	8940	15.03	87.5	-0.191	4
Q7Z591	PF12443	AKNA	98	10772	5.27	16	10	1493	3105	2980	70.06	66.94	-0.915	1	1.74	Q6WQI6	PF00400	WD40	39	4225.88	9.36	3	6	601	8480	8480	18.91	82.56	-0.177	1
Q9C002	PF06522	B12D	68	7793.1	8.27	8	9	1123	17990	0	44.71	98.82	-0.238	1	1.74	O15169.2	PF16646	AXIN1_TNKS_BD	73	7553.22	4.31	12	6	1039	2980	2980	49.08	50.82	-0.644	4
Q9C002	PF06522	B12D	68	7793.1	8.27	8	9	1123	17990	0	44.71	98.82	-0.238	1	1.74	O15169.2	PF00615	RGS	123	14225.3	5.4	18	16	1995	13200	12950	37.9	81.79	-0.385	4
Q9C002	PF06522	B12D	68	7793.1	8.27	8	9	1123	17990	0	44.71	98.82	-0.238	1	1.74	O15169.2	PF08833	Axin_b-cat_bind	58	6010.66	8.61	6	7	835	0	0	79.51	58.79	-0.888	4
Q9C002	PF06522	B12D	68	7793.1	8.27	8	9	1123	17990	0	44.71	98.82	-0.238	1	1.74	O15169.2	PF00778	DIX	80	9292.72	5.48	14	13	1319	9065	8940	15.03	87.5	-0.191	4
Q02363.1	PF00010	HLH	42	4978.9	6.75	5	5	715	4470	4470	59.45	122.86	-0.171	1	1.74	P40261	PF01234	NNMT_PNMT_TEMT	259	29007.3	5.4	24	29	4085	34880	34380	42.2	89.96	-0.185	4
Q9BV90	PF18036	Ubiquitin_4	89	10454.2	9.67	11	17	1492	16960	16960	33.7	91.8	-0.488	1	1.74	Q5TCY1.2	PF00069	Pkinase	272	31477.6	9.68	29	43	4444	31525	31400	35.67	81.69	-0.43	4
Q92989.1	PF16573	CLP1_N	92	10455.9	5.34	13	10	1466	8480	8480	36.69	81.63	-0.27	1	1.74	P52815.2	PF16320	Ribosomal_L12_N	54	5630.64	4.59	6	4	821	0	0	37.94	133.7	0.433	5
Q92989.1	PF16575	CLP1_P	187	20890.8	8.83	21	25	2940	19160	18910	34.16	88.98	-0.221	1	1.74	P52815.2	PF16320	Ribosomal_L12_N	54	5630.64	4.59	6	4	821	0	0	37.94	133.7	0.433	5
Q92989.1	PF06807	Clp1	112	12397.3	5.15	13	8	1753	2980	2980	38.98	97.32	0.115	1	1.74	P52815.2	PF16320	Ribosomal_L12_N	54	5630.64	4.59	6	4	821	0	0	37.94	133.7	0.433	5
Q92989.1	PF16573	CLP1_N	92	10455.9	5.34	13	10	1466	8480	8480	36.69	81.63	-0.27	1	1.74	P52815.2	PF00542	Ribosomal_L12	69	7527.94	9.3	9	12	1115	1490	0	15.52	124.35	0.028	5
Q92989.1	PF16575	CLP1_P	187	20890.8	8.83	21	25	2940	19160	18910	34.16	88.98	-0.221	1	1.74	P52815.2	PF00542	Ribosomal_L12	69	7527.94	9.3	9	12	1115	1490	0	15.52	124.35	0.028	5
Q92989.1	PF06807	Clp1	112	12397.3	5.15	13	8	1753	2980	2980	38.98	97.32	0.115	1	1.74	P52815.2	PF00542	Ribosomal_L12	69	7527.94	9.3	9	12	1115	1490	0	15.52	124.35	0.028	5
Q9HAW0.1	PF08271	TF_Zn_Ribbon	38	3979.36	4.01	6	1	530	1740	1490	62.14	68.95	-0.055	1	1.74	Q9H5Q4.1	PF00398	RrnaAD	309	35574.7	9.23	34	43	5069	35660	35410	45.15	95.92	-0.238	5
P09012.3	PF00076	RRM_1	72	8377.86	9.92	6	12	1202	4470	0	41.57	93.47	-0.172	1	1.74	P21673.1	PF00583	Acetyltransf_1	132	15550.9	5.17	20	13	2155	30160	29910	50.51	81.97	-0.167	4
Q53GS9.2	PF02148	zf-UBP	64	7317.45	7.9	3	4	1019	7700	7450	42.33	103.59	0.252	1	1.74	Q9BTM9.1	PF09138	Urm1	96	10896.4	4.54	17	9	1552	17990	0	35.75	117.71	-0.142	4
Q53GS9.3	PF00443	UCH	328	38196.2	8.56	37	40	5424	42985	42860	39.46	92.1	-0.359	1	1.74	Q9BTM9.1	PF09138	Urm1	96	10896.4	4.54	17	9	1552	17990	0	35.75	117.71	-0.142	4
P78549.2	PF00730	HhH-GPD	139	15216.7	9.99	11	18	2176	26470	0	43.14	96.91	-0.109	1	1.74	Q16719	PF00266	Aminotran_5	335	37505.7	8.14	36	38	5330	47245	46870	37.4	100.18	-0.025	4
P78549.2	PF00633	HHH	30	2972.51	5.99	2	1	423	1490	0	50.91	110.67	0.717	5	1.74	Q16719	PF00266	Aminotran_5	335	37505.7	8.14	36	38	5330	47245	46870	37.4	100.18	-0.025	4
P04066	PF01120	Alpha_L_fucos	344	40251.1	5.75	43	34	5535	139590	139340	39.88	64.59	-0.592	8	1.74	O95361.3	PF00643	zf-B_box	40	4556.11	6.15	3	1	596	7365	6990	35.51	51.25	-0.378	4
P04066	PF01120	Alpha_L_fucos	344	40251.1	5.75	43	34	5535	139590	139340	39.88	64.59	-0.592	8	1.74	O95361.3	PF13765	PRY	50	6090.81	7.03	6	6	849	13980	0	54.02	68.2	-1.052	4
P04066	PF01120	Alpha_L_fucos	344	40251.1	5.75	43	34	5535	139590	139340	39.88	64.59	-0.592	8	1.74	O95361.3	PF00622	SPRY	122	13969.9	6.78	14	14	1939	34045	33920	33.61	70.33	-0.2	4
P04066	PF16757	Fucosidase_C	86	9565.95	5.64	7	6	1355	30480	0	22.23	87.33	-0.107	8	1.74	O95361.3	PF00643	zf-B_box	40	4556.11	6.15	3	1	596	7365	6990	35.51	51.25	-0.378	4
P04066	PF16757	Fucosidase_C	86	9565.95	5.64	7	6	1355	30480	0	22.23	87.33	-0.107	8	1.74	O95361.3	PF13765	PRY	50	6090.81	7.03	6	6	849	13980	0	54.02	68.2	-1.052	4
P04066	PF16757	Fucosidase_C	86	9565.95	5.64	7	6	1355	30480	0	22.23	87.33	-0.107	8	1.74	O95361.3	PF00622	SPRY	122	13969.9	6.78	14	14	1939	34045	33920	33.61	70.33	-0.2	4
Q9Y657.3	PF02513	Spin-Ssty	51	5736.56	6.72	5	5	803	15595	15470	15.92	87.65	-0.32	1	1.74	Q99558.2	PF00069	Pkinase	249	27198.4	6.05	29	24	3804	24575	23950	45.86	90.08	-0.08	1
Q5MJ70.2	PF11357	Spy1	141	17170	7.14	21	21	2404	36815	36440	34.48	83.76	-0.237	1	1.74	Q2VPK5	PF10288	CTU2	128	13752.7	7.44	12	13	1893	9105	8480	60.47	65.62	-0.59	4
P51826	PF05110	AF-4	154	17234.8	8.78	18	20	2372	11460	11460	55.71	48.12	-1.216	1	1.74	P06132.2	PF01208	URO-D	347	38590.1	5.77	41	34	5429	44265	43890	48.53	90	-0.096	4
Q9ULX3.1	PF17146	PIN_6	87	9923.48	9.05	11	13	1430	7450	0	48.35	108.74	-0.116	1	1.74	Q6UB35	PF00763	THF_DHG_CYH	111	12311	4.48	20	10	1751	0	0	47.36	117.75	-0.24	5
Q9ULX3.1	PF15017	WRNPLPNID	61	7114.47	3.79	21	4	951	11000	0	86.08	55.9	-1.2	1	1.74	Q6UB35	PF00763	THF_DHG_CYH	111	12311	4.48	20	10	1751	0	0	47.36	117.75	-0.24	5
Q9ULX3.1	PF08772	NOB1_Zn_bind	72	8081.34	10.05	4	13	1128	3230	2980	40.02	59.44	-0.582	1	1.74	Q6UB35	PF00763	THF_DHG_CYH	111	12311	4.48	20	10	1751	0	0	47.36	117.75	-0.24	5
Q9ULX3.1	PF17146	PIN_6	87	9923.48	9.05	11	13	1430	7450	0	48.35	108.74	-0.116	1	1.74	Q6UB35	PF02882	THF_DHG_CYH_C	127	13772	8.4	12	14	1962	11250	11000	36.04	101.26	0.015	5
Q9ULX3.1	PF15017	WRNPLPNID	61	7114.47	3.79	21	4	951	11000	0	86.08	55.9	-1.2	1	1.74	Q6UB35	PF02882	THF_DHG_CYH_C	127	13772	8.4	12	14	1962	11250	11000	36.04	101.26	0.015	5
Q9ULX3.1	PF08772	NOB1_Zn_bind	72	8081.34	10.05	4	13	1128	3230	2980	40.02	59.44	-0.582	1	1.74	Q6UB35	PF02882	THF_DHG_CYH_C	127	13772	8.4	12	14	1962	11250	11000	36.04	101.26	0.015	5
Q9ULX3.1	PF17146	PIN_6	87	9923.48	9.05	11	13	1430	7450	0	48.35	108.74	-0.116	1	1.74	Q6UB35	PF01268	FTHFS	619	66669.9	6.79	68	67	9490	29380	28880	30.78	99.26	0.012	4
Q9ULX3.1	PF15017	WRNPLPNID	61	7114.47	3.79	21	4	951	11000	0	86.08	55.9	-1.2	1	1.74	Q6UB35	PF01268	FTHFS	619	66669.9	6.79	68	67	9490	29380	28880	30.78	99.26	0.012	4
Q9ULX3.1	PF08772	NOB1_Zn_bind	72	8081.34	10.05	4	13	1128	3230	2980	40.02	59.44	-0.582	1	1.74	Q6UB35	PF01268	FTHFS	619	66669.9	6.79	68	67	9490	29380	28880	30.78	99.26	0.012	4
P62875.1	PF01194	RNA_pol_N	59	6716.03	7.66	7	8	956	10220	9970	31.32	115.76	0.273	1	1.74	Q13084	PF00830	Ribosomal_L28	63	7474.65	9.11	9	11	1067	19480	0	30.89	91.27	-0.519	5
Q96AV8	PF02319	E2F_TDP	69	7876.12	9.52	6	10	1129	11460	11460	44.95	107.25	-0.201	1	1.74	P13995	PF00763	THF_DHG_CYH	117	12942.7	5.15	18	13	1837	6990	6990	49.59	109.06	-0.362	4
Q96AV8	PF02319	E2F_TDP	69	7876.12	9.52	6	10	1129	11460	11460	44.95	107.25	-0.201	1	1.74	P13995	PF02882	THF_DHG_CYH_C	175	18656	9.55	14	20	2681	15470	15470	12.6	104.69	0.145	5
Q15573.1	PF14929	TAF1_subA	361	42604	9.08	39	48	5986	107385	107260	40.7	84.1	-0.437	1	1.74	Q9P2R7.3	PF08442	ATP-grasp_2	209	22878.5	6.74	27	27	3252	12045	11920	53.676	88.18	-0.189	5
Q15573.1	PF14929	TAF1_subA	361	42604	9.08	39	48	5986	107385	107260	40.7	84.1	-0.437	1	1.74	Q9P2R7.3	PF00549	Ligase_CoA	121	12668	5.56	14	12	1831	125	0	19.44	128.93	0.636	5
P51826	PF05110	AF-4	154	17234.8	8.78	18	20	2372	11460	11460	55.71	48.12	-1.216	1	1.74	P82650.1	PF10245	MRP-S22	242	28482.8	6.38	37	35	4037	27390	27390	41.03	88.97	-0.51	5
Q99967.2	PF04487	CITED	270	28496.6	6.42	17	11	3834	11585	11460	51.33	46.33	-0.6	1	1.74	P15104.4	PF03951	Gln-synt_N	81	9312.56	4.71	14	10	1286	15595	15470	49.47	64.94	-0.553	5
Q99967.2	PF04487	CITED	270	28496.6	6.42	17	11	3834	11585	11460	51.33	46.33	-0.6	1	1.74	P15104.4	PF00120	Gln-synt_C	178	20106.8	6.32	20	17	2750	39795	39420	35.1	60.34	-0.475	4
P42695.2	PF12717	Cnd1	178	21217	9.07	19	26	3009	13325	12950	46.19	95.28	-0.05	1	1.74	Q9P0M9	PF01016	Ribosomal_L27	84	9224.51	10.2	5	15	1297	11460	11460	52.01	63.81	-0.781	5
P26368.4	PF00076	RRM_1	75	8304.47	4.29	8	4	1157	1490	0	31.45	82	0.061	1	1.74	Q9BYC2.2	PF01144	CoA_trans	230	24932.5	5.09	30	23	3518	16180	15930	30.29	98.74	0.053	5
P09430	PF02079	TP1	51	5955.82	12.09	2	21	849	2980	0	62.85	22.94	-2.169	1	1.74	Q14204.5	PF08385	DHC_N1	591	68865.4	9.45	81	97	9812	75985	75860	40.26	96.65	-0.467	5
P09430	PF02079	TP1	51	5955.82	12.09	2	21	849	2980	0	62.85	22.94	-2.169	1	1.74	Q14204.5	PF08393	DHC_N2	402	47046.7	6.71	57	56	6716	80900	80900	37.8	106.12	-0.241	2
P09430	PF02079	TP1	51	5955.82	12.09	2	21	849	2980	0	62.85	22.94	-2.169	1	1.74	Q14204.5	PF12774	AAA_6	363	40702.8	5.48	46	39	5716	27890	27390	35.13	87.25	-0.208	9
P09430	PF02079	TP1	51	5955.82	12.09	2	21	849	2980	0	62.85	22.94	-2.169	1	1.74	Q14204.5	PF17852	Dynein_AAA_lid	128	14886.2	6.4	12	11	2087	27055	26930	42.14	94.53	-0.17	5
P09430	PF02079	TP1	51	5955.82	12.09	2	21	849	2980	0	62.85	22.94	-2.169	1	1.74	Q14204.5	PF12775	AAA_7	183	20704	7.18	19	19	2924	27180	26930	28.22	91.48	-0.088	5
P09430	PF02079	TP1	51	5955.82	12.09	2	21	849	2980	0	62.85	22.94	-2.169	1	1.74	Q14204.5	PF12780	AAA_8	280	31998.7	6.59	33	31	4483	37150	36900	39.11	87	-0.274	1
P09430	PF02079	TP1	51	5955.82	12.09	2	21	849	2980	0	62.85	22.94	-2.169	1	1.74	Q14204.5	PF12777	MT	338	38728.5	6.58	52	51	5480	34045	33920	50.34	89.82	-0.537	4
P09430	PF02079	TP1	51	5955.82	12.09	2	21	849	2980	0	62.85	22.94	-2.169	1	1.74	Q14204.5	PF12781	AAA_9	221	25331.9	5.05	35	30	3595	10095	9970	49.73	100.09	-0.352	1
P09430	PF02079	TP1	51	5955.82	12.09	2	21	849	2980	0	62.85	22.94	-2.169	1	1.74	Q14204.5	PF03028	Dynein_heavy	118	12916.1	8.71	9	11	1831	12615	12490	36.33	93.39	-0.01	5
P09430	PF02079	TP1	51	5955.82	12.09	2	21	849	2980	0	62.85	22.94	-2.169	1	1.74	Q14204.5	PF18198	AAA_lid_11	174	20207	7.89	23	24	2830	39085	38960	48.47	79.08	-0.486	5
P09430	PF02079	TP1	51	5955.82	12.09	2	21	849	2980	0	62.85	22.94	-2.169	1	1.74	Q14204.5	PF18199	Dynein_C	312	34968.2	8.13	34	36	4943	43805	43430	41.35	91.25	-0.211	5
Q6ZYL4.1	PF06331	Tfb5	69	7797.09	4.33	11	5	1110	1490	1490	35.42	124.2	0.345	1	1.74	Q03013.3	PF02798	GST_N	80	9332.63	5.52	11	9	1305	21430	21430	31.45	90.38	-0.401	4
Q6ZYL4.1	PF06331	Tfb5	69	7797.09	4.33	11	5	1110	1490	1490	35.42	124.2	0.345	1	1.74	Q03013.3	PF14497	GST_C_3	97	11450.2	5.04	15	11	1598	11585	11460	30.34	79.38	-0.211	4
O75971.1	PF15497	SNAPc19	91	10512.5	4.48	25	9	1453	0	0	85.4	84.62	-0.967		1.74	P21673.1	PF00583	Acetyltransf_1	132	15550.9	5.17	20	13	2155	30160	29910	50.51	81.97	-0.167	4
Q8TCE9	PF00337	Gal-bind_lectin	133	15473.1	7.31	13	13	2177	17670	17420	40.61	90	0.085	1	1.74	Q8IUQ0	PF03765	CRAL_TRIO_N	73	8524.76	6.22	11	10	1211	0	0	42.56	103.01	-0.373	5
Q8TCE9	PF00337	Gal-bind_lectin	133	15473.1	7.31	13	13	2177	17670	17420	40.61	90	0.085	1	1.74	Q8IUQ0	PF00650	CRAL_TRIO	155	17799.6	8.24	15	16	2543	20970	0	46.66	110.77	0	4
P42695.2	PF12717	Cnd1	178	21217	9.07	19	26	3009	13325	12950	46.19	95.28	-0.05	1	1.74	Q03013.3	PF02798	GST_N	80	9332.63	5.52	11	9	1305	21430	21430	31.45	90.38	-0.401	4
P42695.2	PF12717	Cnd1	178	21217	9.07	19	26	3009	13325	12950	46.19	95.28	-0.05	1	1.74	Q03013.3	PF14497	GST_C_3	97	11450.2	5.04	15	11	1598	11585	11460	30.34	79.38	-0.211	4
Q6UXN9	PF00400	WD40	41	4674.09	4.41	8	5	640	1490	1490	37.74	68.78	-0.483	1	1.74	O15169.2	PF16646	AXIN1_TNKS_BD	73	7553.22	4.31	12	6	1039	2980	2980	49.08	50.82	-0.644	4
Q6UXN9	PF00400	WD40	41	4674.09	4.41	8	5	640	1490	1490	37.74	68.78	-0.483	1	1.74	O15169.2	PF08833	Axin_b-cat_bind	58	6010.66	8.61	6	7	835	0	0	79.51	58.79	-0.888	4
Q6UXN9	PF00400	WD40	41	4674.09	4.41	8	5	640	1490	1490	37.74	68.78	-0.483	1	1.74	O15169.2	PF00778	DIX	80	9292.72	5.48	14	13	1319	9065	8940	15.03	87.5	-0.191	4
Q0VD86	PF15142	INCA1	179	20513.4	9.23	20	25	2870	35200	34950	90.08	65.92	-0.822	1	1.74	P82912	PF00411	Ribosomal_S11	110	11380.2	11.04	4	15	1627	125	0	26.99	89.73	-0.095	5
Q5TB30	PF00610	DEP	80	9550.81	9.58	9	13	1332	13980	13980	36.78	70.62	-0.871	5	1.74	P30711	PF13417	GST_N_3	79	9055.66	8.75	9	11	1312	7450	7450	19.33	118.48	0.062	4
Q5TB30	PF00610	DEP	80	9550.81	9.58	9	13	1332	13980	13980	36.78	70.62	-0.871	5	1.74	P30711	PF00043	GST_C	91	10062.8	6.31	9	8	1443	11000	11000	54.78	110.44	0.273	4
O95766	PF08217	DUF1712 PF08217	401	46911.9	6.05	55	49	6572	35215	34840	47.45	81.65	-0.396	8	1.74	A2A3N6	PF01504	PIP5K	283	32490.3	8.63	33	37	4563	30745	30370	52.01	85.44	-0.401	4
O95766	PF08217	DUF1712 PF08217	401	46911.9	6.05	55	49	6572	35215	34840	47.45	81.65	-0.396	8	1.74	A2A3N6	PF13519	VWA_2	111	12202.9	8.58	9	11	1714	1615	1490	26.61	88.65	-0.346	4
Q8NFW8.2	PF02348	CTP_transf_3	258	29308.2	6.01	36	31	4109	44015	43890	54.48	91.05	-0.369	1	1.74	Q14442.1	PF10181	PIG-H	70	7821.24	5.04	7	5	1124	5960	5960	39.92	121	0.439	4
Q96T37	PF00076	RRM_1	68	7628.51	8.17	11	12	1068	1490	0	33.57	74.56	-0.616	3	1.74	P49753	PF04775	Bile_Hydr_Trans	126	14087.2	6.36	20	19	2011	8480	8480	36.47	99.84	-0.36	5
Q96T37	PF00076	RRM_1	68	7628.51	8.17	11	12	1068	1490	0	33.57	74.56	-0.616	3	1.74	P49753	PF08840	BAAT_C	210	23120.5	6.86	21	20	3247	28670	28420	42.64	87.76	-0.175	4
Q96T37	PF07744	SPOC	178	18976.8	9.48	14	20	2701	1095	9970	51.71	94.83	-0.161	1	1.74	P49753	PF04775	Bile_Hydr_Trans	126	14087.2	6.36	20	19	2011	8480	8480	36.47	99.84	-0.36	5
Q96T37	PF07744	SPOC	178	18976.8	9.48	14	20	2701	1095	9970	51.71	94.83	-0.161	1	1.74	P49753	PF08840	BAAT_C	210	23120.5	6.86	21	20	3247	28670	28420	42.64	87.76	-0.175	4
P05423.2	PF05132	RNA_pol_Rpc4	127	13795	5.01	19	14	1974	125	0	36.79	105.04	-0.135	1	1.74	P31937.2	PF03446	NAD_binding_2	160	16648.2	4.73	19	13	2337	6085	5960	35.12	89.62	0.174	5
P05423.2	PF05132	RNA_pol_Rpc4	127	13795	5.01	19	14	1974	125	0	36.79	105.04	-0.135	1	1.74	P31937.2	PF14833	NAD_binding_11	128	13557.8	9.1	7	11	1902	11585	11460	25.7	85.47	0.089	5
Q9UK76	PF17054	JUPITER	71	7561.32	9.82	6	9	1042	5500	0	60.47	35.77	-0.901	1	1.74	Q6XE24	PF00076	RRM_1	66	7042.1	9.04	5	8	1001	4595	4470	9.39	87.27	-0.218	1
Q01459	PF00704	Glyco_hydro_18	301	34399.8	5.58	34	29	4716	81290	80790	48.99	73.26	-0.38	8	1.74	Q92837.3	PF05350	GSK-3_bind	239	25159.6	6.85	29	29	3556	7240	6990	79.83	85.06	-0.475	4
Q9UIF7.1	PF00730	HhH-GPD	137	14861.9	8.09	10	11	2093	29450	29450	42.94	94.67	-0.069	1	1.74	P63302	PF10262	Rdx	75	8308.57	9.15	9	13	1176	6085	5960	9.1	80.53	-0.24	4
Q9UIF7.1	PF00633	HHH	31	3208.68	6.86	2	2	456	1490	0	37.69	97.74	0.061	1	1.74	P63302	PF10262	Rdx	75	8308.57	9.15	9	13	1176	6085	5960	9.1	80.53	-0.24	4
Q9UIF7.1	PF14815	NUDIX_4	124	13746.9	8.2	9	10	1958	24980	24980	53.79	98.31	-0.03	1	1.74	P63302	PF10262	Rdx	75	8308.57	9.15	9	13	1176	6085	5960	9.1	80.53	-0.24	4
Q15596.2	PF00989	PAS	101	11482	5.23	13	8	1495	9970	9970	37.29	82.77	-0.305	4	1.74	Q58A63	PF02833	DHHA2	143	16189.3	4.04	26	8	2240	4970	4470	54.54	95.31	-0.071	4
Q15596.2	PF14598	PAS_11	113	12961.7	9.57	11	15	1816	8480	8480	42.42	76.81	-0.619	4	1.74	Q58A63	PF02833	DHHA2	143	16189.3	4.04	26	8	2240	4970	4470	54.54	95.31	-0.071	4
Q15596.2	PF16665	NCOA_u2	115	11768.2	9.86	2	6	1621	2980	2980	85.9	58.52	-0.452	1	1.74	Q58A63	PF02833	DHHA2	143	16189.3	4.04	26	8	2240	4970	4470	54.54	95.31	-0.071	4
Q15596.2	PF08832	SRC-1	84	8909.89	7.14	10	10	1256	0	0	54.09	77.86	-0.767	1	1.74	Q58A63	PF02833	DHHA2	143	16189.3	4.04	26	8	2240	4970	4470	54.54	95.31	-0.071	4
Q15596.2	PF16279	DUF4927	86	9726.89	4.49	21	13	1373	1490	0	61.03	79.42	-1.071	1	1.74	Q58A63	PF02833	DHHA2	143	16189.3	4.04	26	8	2240	4970	4470	54.54	95.31	-0.071	4
Q15596.2	PF08815	Nuc_rec_co-act	47	5189.68	3.69	11	2	722	1490	0	62.92	103.83	-0.317	1	1.74	Q58A63	PF02833	DHHA2	143	16189.3	4.04	26	8	2240	4970	4470	54.54	95.31	-0.071	4
Q15596.2	PF07469	DUF1518	58	6243.1	8.75	1	2	851	1490	0	91.18	28.79	-0.667	1	1.74	Q58A63	PF02833	DHHA2	143	16189.3	4.04	26	8	2240	4970	4470	54.54	95.31	-0.071	4
Q15596.2	PF00989	PAS	101	11482	5.23	13	8	1495	9970	9970	37.29	82.77	-0.305	4	1.74	Q58A63	PF12496	BNIP2	117	13287.2	4.14	30	11	1814	12950	0	60.67	72.48	-1.043	4
Q15596.2	PF14598	PAS_11	113	12961.7	9.57	11	15	1816	8480	8480	42.42	76.81	-0.619	4	1.74	Q58A63	PF12496	BNIP2	117	13287.2	4.14	30	11	1814	12950	0	60.67	72.48	-1.043	4
Q15596.2	PF16665	NCOA_u2	115	11768.2	9.86	2	6	1621	2980	2980	85.9	58.52	-0.452	1	1.74	Q58A63	PF12496	BNIP2	117	13287.2	4.14	30	11	1814	12950	0	60.67	72.48	-1.043	4
Q15596.2	PF08832	SRC-1	84	8909.89	7.14	10	10	1256	0	0	54.09	77.86	-0.767	1	1.74	Q58A63	PF12496	BNIP2	117	13287.2	4.14	30	11	1814	12950	0	60.67	72.48	-1.043	4
Q15596.2	PF16279	DUF4927	86	9726.89	4.49	21	13	1373	1490	0	61.03	79.42	-1.071	1	1.74	Q58A63	PF12496	BNIP2	117	13287.2	4.14	30	11	1814	12950	0	60.67	72.48	-1.043	4
Q15596.2	PF08815	Nuc_rec_co-act	47	5189.68	3.69	11	2	722	1490	0	62.92	103.83	-0.317	1	1.74	Q58A63	PF12496	BNIP2	117	13287.2	4.14	30	11	1814	12950	0	60.67	72.48	-1.043	4
Q15596.2	PF07469	DUF1518	58	6243.1	8.75	1	2	851	1490	0	91.18	28.79	-0.667	1	1.74	Q58A63	PF12496	BNIP2	117	13287.2	4.14	30	11	1814	12950	0	60.67	72.48	-1.043	4
O43365.1	PF00046	Homeodomain	57	7174.43	10.72	5	15	1023	9970	9970	39.01	71.93	-0.988	1	1.74	Q9P0J6	PF00444	Ribosomal_L36	38	4883.89	10.61	1	14	696	10095	9970	71.97	43.42	-1.432	5
O43365.1	PF13293	DUF4074	65	6551.15	6.44	4	2	892	2980	0	21.01	51.23	-0.686	1	1.74	Q9P0J6	PF00444	Ribosomal_L36	38	4883.89	10.61	1	14	696	10095	9970	71.97	43.42	-1.432	5
P05423.2	PF05132	RNA_pol_Rpc4	127	13795	5.01	19	14	1974	125	0	36.79	105.04	-0.135	1	1.74	Q5EBM0	PF02223	Thymidylate_kin	182	20399.2	5.99	24	21	2880	25565	25440	59.01	89.45	-0.366	5
Q16514.1	PF03847	TFIID_20kDa	68	7977.03	4.72	15	9	1122	5500	5500	50.2	98.82	-0.625	1	1.74	P20807.2	PF00648	Peptidase_C2	341	39511.5	4.92	52	35	5442	80370	79870	30.49	70.62	-0.464	4
Q16514.1	PF03847	TFIID_20kDa	68	7977.03	4.72	15	9	1122	5500	5500	50.2	98.82	-0.625	1	1.74	P20807.2	PF01067	Calpain_III	144	16929.2	9.01	19	23	2360	20065	19940	46.28	66.32	-0.707	4
Q16514.1	PF03847	TFIID_20kDa	68	7977.03	4.72	15	9	1122	5500	5500	50.2	98.82	-0.625	1	1.74	P20807.2	PF16648	Calpain_u2	71	7909.58	5.12	14	12	1102	0	0	76.15	43.8	-1.642	4
Q16514.1	PF03847	TFIID_20kDa	68	7977.03	4.72	15	9	1122	5500	5500	50.2	98.82	-0.625	1	1.74	P20807.2	PF13202	EF-hand_5	15	1708.89	5.3	3	2	235	0	0	6.24	65.33	-0.127	3
Q7Z591	PF12443	AKNA	98	10772	5.27	16	10	1493	3105	2980	70.06	66.94	-0.915	1	1.74	O75891	PF00551	Formyl_trans_N	180	19862.9	6.05	22	19	2806	24075	23950	26.79	94.22	-0.064	4
Q7Z591	PF12443	AKNA	98	10772	5.27	16	10	1493	3105	2980	70.06	66.94	-0.915	1	1.74	O75891	PF02911	Formyl_trans_C	107	11659.4	6.93	12	12	1648	16500	16500	30.77	85.79	-0.287	4
Q7Z591	PF12443	AKNA	98	10772	5.27	16	10	1493	3105	2980	70.06	66.94	-0.915	1	1.74	O75891	PF00550	PP-binding	67	7579.57	4.13	15	6	1066	6990	6990	37.94	107.46	0.084	4
Q7Z591	PF12443	AKNA	98	10772	5.27	16	10	1493	3105	2980	70.06	66.94	-0.915	1	1.74	O75891	PF00171	Aldedh	469	50958.5	7.26	52	52	7176	34420	33920	25.74	87.31	-0.064	4
P10412.2	PF00538	Linker_histone	72	7284.47	10.24	4	12	1064	1490	0	13.72	97.64	-0.062	1	1.74	Q6P1L8	PF00238	Ribosomal_L14	115	12687.9	10.38	7	20	1821	4595	4470	23.3	90.61	-0.359	5
Q92908.2	PF05349	GATA-N	232	22194.3	9.01	5	7	3022	27390	0	56.56	52.11	-0.234	1	1.74	P09132.3	PF01922	SRP19	99	11380.2	9.44	10	16	1614	13075	12950	45.78	88.59	-0.384	4
Q92908.2	PF00320	GATA	35	3819.38	8.52	1	3	517	8730	8480	55.15	66.86	-0.197	1	1.74	P09132.3	PF01922	SRP19	99	11380.2	9.44	10	16	1614	13075	12950	45.78	88.59	-0.384	4
P13686.3	PF00149	Metallophos	219	24833.3	8.44	21	23	3482	39545	39420	39.18	87.72	-0.197	3	1.74	Q8N3C0.3	PF00270	DEAD	180	20302.7	7.1	20	20	2912	11460	11460	29.53	113.67	0.051	1
P13686.3	PF00149	Metallophos	219	24833.3	8.44	21	23	3482	39545	39420	39.18	87.72	-0.197	3	1.74	Q8N3C0.3	PF00271	Helicase_C	159	17866.7	9.67	12	19	2519	10095	9970	40.31	91.32	-0.099	4
P13686.3	PF00149	Metallophos	219	24833.3	8.44	21	23	3482	39545	39420	39.18	87.72	-0.197	3	1.74	Q8N3C0.3	PF02889	Sec63	309	35744.1	5.95	40	34	5062	62005	61880	44.42	101.59	-0.156	1
Q9UIF7.1	PF00730	HhH-GPD	137	14861.9	8.09	10	11	2093	29450	29450	42.94	94.67	-0.069	1	1.74	P51970	PF06747	CHCH	36	4373.92	4.95	6	4	589	8730	8480	50.17	46.11	-0.675	5
Q9UIF7.1	PF00633	HHH	31	3208.68	6.86	2	2	456	1490	0	37.69	97.74	0.061	1	1.74	P51970	PF06747	CHCH	36	4373.92	4.95	6	4	589	8730	8480	50.17	46.11	-0.675	5
Q9UIF7.1	PF14815	NUDIX_4	124	13746.9	8.2	9	10	1958	24980	24980	53.79	98.31	-0.03	1	1.74	P51970	PF06747	CHCH	36	4373.92	4.95	6	4	589	8730	8480	50.17	46.11	-0.675	5
Q96BN2	PF12767	SAGA-Tad1	127	14205.1	9.41	14	19	2008	17990	17990	27.28	75.35	-0.739	1	1.74	Q8N1V2.3	PF00400	WD40	44	4847.45	5.45	4	3	671	6990	6990	41.87	82.05	-0.075	4
P04553.2	PF00260	Protamine_P1	49	6554.65	12.08	0	24	907	6335	5960	167.64	4.08	-2.339	1	1.74	P47874.2	PF06554	Olfactory_mark	151	17514	5.61	22	21	2476	24980	0	31.26	88.41	-0.517	4
Q9HB96.1	PF11510	FA_FANCE	262	28840.1	5.23	27	22	4147	17460	16960	52.42	117.71	0.229	1	1.74	P21695.4	PF01210	NAD_Gly3P_dh_N	170	18008.8	5.33	20	15	2560	12740	12490	15.55	104.35	0.124	4
Q9HB96.1	PF11510	FA_FANCE	262	28840.1	5.23	27	22	4147	17460	16960	52.42	117.71	0.229	1	1.74	P21695.4	PF07479	NAD_Gly3P_dh_C	148	15928.5	5.72	17	15	2246	6335	5960	24.7	92.91	0.184	4
Q15596.2	PF00989	PAS	101	11482	5.23	13	8	1495	9970	9970	37.29	82.77	-0.305	4	1.74	P07741.2	PF00156	Pribosyltran	149	15956.6	6.93	17	17	2293	10095	9970	33.37	113.29	0.191	4
Q15596.2	PF14598	PAS_11	113	12961.7	9.57	11	15	1816	8480	8480	42.42	76.81	-0.619	4	1.74	P07741.2	PF00156	Pribosyltran	149	15956.6	6.93	17	17	2293	10095	9970	33.37	113.29	0.191	4
Q15596.2	PF16665	NCOA_u2	115	11768.2	9.86	2	6	1621	2980	2980	85.9	58.52	-0.452	1	1.74	P07741.2	PF00156	Pribosyltran	149	15956.6	6.93	17	17	2293	10095	9970	33.37	113.29	0.191	4
Q15596.2	PF08832	SRC-1	84	8909.89	7.14	10	10	1256	0	0	54.09	77.86	-0.767	1	1.74	P07741.2	PF00156	Pribosyltran	149	15956.6	6.93	17	17	2293	10095	9970	33.37	113.29	0.191	4
Q15596.2	PF16279	DUF4927	86	9726.89	4.49	21	13	1373	1490	0	61.03	79.42	-1.071	1	1.74	P07741.2	PF00156	Pribosyltran	149	15956.6	6.93	17	17	2293	10095	9970	33.37	113.29	0.191	4
Q15596.2	PF08815	Nuc_rec_co-act	47	5189.68	3.69	11	2	722	1490	0	62.92	103.83	-0.317	1	1.74	P07741.2	PF00156	Pribosyltran	149	15956.6	6.93	17	17	2293	10095	9970	33.37	113.29	0.191	4
Q15596.2	PF07469	DUF1518	58	6243.1	8.75	1	2	851	1490	0	91.18	28.79	-0.667	1	1.74	P07741.2	PF00156	Pribosyltran	149	15956.6	6.93	17	17	2293	10095	9970	33.37	113.29	0.191	4
Q15583.3	PF05920	Homeobox_KN	40	4951.56	9.11	3	5	685	15470	15470	71.47	73.25	-0.9	1	1.74	Q9Y399	PF00318	Ribosomal_S2	103	12016.9	9.44	9	13	16676	7575	7450	29.4	83.5	-0.22	1
O43365.1	PF00046	Homeodomain	57	7174.43	10.72	5	15	1023	9970	9970	39.01	71.93	-0.988	1	1.74	Q9BYD1	PF00572	Ribosomal_L13	125	14287.7	9.48	10	15	2023	19940	19940	38.65	95.2	-0.214	5
O43365.1	PF13293	DUF4074	65	6551.15	6.44	4	2	892	2980	0	21.01	51.23	-0.686	1	1.74	Q9BYD1	PF00572	Ribosomal_L13	125	14287.7	9.48	10	15	2023	19940	19940	38.65	95.2	-0.214	5
Q9UBR2	PF00112	Peptidase_C1	235	26419.3	5.63	27	21	3582	81985	81360	31.52	62.72	-0.584	3	1.74	P63302	PF10262	Rdx	75	8308.57	9.15	9	13	1176	6085	5960	9.1	80.53	-0.24	4
Q9Y535.1	PF03876	SHS2_Rpb7-N	70	8012.3	6.88	9	9	1134	8605	8480	17.4	98.71	0.026	1	1.74	P26639.3	PF02789	Peptidase_M17_N	133	14391.2	4.93	22	16	2023	11585	11460	30.19	85.86	-0.444	4
Q9Y535.1	PF08292	RNA_pol_Rbc25	123	13634.1	4.06	25	7	1889	26470	26470	53.71	80.81	-0.293	1	1.74	P26639.3	PF02789	Peptidase_M17_N	133	14391.2	4.93	22	16	2023	11585	11460	30.19	85.86	-0.444	4
Q9Y535.1	PF03876	SHS2_Rpb7-N	70	8012.3	6.88	9	9	1134	8605	8480	17.4	98.71	0.026	1	1.74	P26639.3	PF00883	Peptidase_M17	312	33706.8	8.25	31	33	4744	35200	34950	37.06	85.45	-0.103	4
Q9Y535.1	PF08292	RNA_pol_Rbc25	123	13634.1	4.06	25	7	1889	26470	26470	53.71	80.81	-0.293	1	1.74	P26639.3	PF00883	Peptidase_M17	312	33706.8	8.25	31	33	4744	35200	34950	37.06	85.45	-0.103	4
P29083.2	PF02002	TFIIE_alpha	108	12956	9.69	15	23	841	9065	8940	42.88	92.04	-0.613	1	1.74	O00471.1	PF07393	Sec10	619	71476.1	6.61	82	78	10061	35270	34270	36.82	92.92	-0.332	4
P29083.2	PF08271	TF_Zn_Ribbon	50	5679.4	4.6	9	5	769	250	0	59.63	41	-0.438	1	1.74	O00471.1	PF07393	Sec10	619	71476.1	6.61	82	78	10061	35270	34270	36.82	92.92	-0.332	4
P29083.2	PF02002	TFIIE_alpha	108	12956	9.69	15	23	841	9065	8940	42.88	92.04	-0.613	1	1.74	Q96NW7.1	PF13855	LRR_8	59	6963.16	8.39	7	8	1005	1490	0	33.07	122.37	-0.203	1
P29083.2	PF08271	TF_Zn_Ribbon	50	5679.4	4.6	9	5	769	250	0	59.63	41	-0.438	1	1.74	Q96NW7.1	PF13855	LRR_8	59	6963.16	8.39	7	8	1005	1490	0	33.07	122.37	-0.203	1
P29083.2	PF02002	TFIIE_alpha	108	12956	9.69	15	23	841	9065	8940	42.88	92.04	-0.613	1	1.74	Q96NW7.1	PF00595	PDZ	85	9124.45	8.15	7	8	1293	0	0	18.25	91.65	-0.176	3
P29083.2	PF08271	TF_Zn_Ribbon	50	5679.4	4.6	9	5	769	250	0	59.63	41	-0.438	1	1.74	Q96NW7.1	PF00595	PDZ	85	9124.45	8.15	7	8	1293	0	0	18.25	91.65	-0.176	3
Q9H4Z3.1	PF00397	WW	31	3989.46	9.19	3	5	538	19480	19480	84.89	25.16	-1.323	1	1.74	P82912	PF00411	Ribosomal_S11	110	11380.2	11.04	4	15	1627	125	0	26.99	89.73	-0.095	5
Q9H4Z3.1	PF12237	PCIF1_WW	176	20491.5	5.54	21	16	2830	28795	28420	51.51	72.05	-0.115	1	1.74	P82912	PF00411	Ribosomal_S11	110	11380.2	11.04	4	15	1627	125	0	26.99	89.73	-0.095	5
P04066	PF01120	Alpha_L_fucos	344	40251.1	5.75	43	34	5535	139590	139340	39.88	64.59	-0.592	8	1.74	Q9BYC2.2	PF01144	CoA_trans	230	24932.5	5.09	30	23	3518	16180	15930	30.29	98.74	0.053	5
P04066	PF16757	Fucosidase_C	86	9565.95	5.64	7	6	1355	30480	0	22.23	87.33	-0.107	8	1.74	Q9BYC2.2	PF01144	CoA_trans	230	24932.5	5.09	30	23	3518	16180	15930	30.29	98.74	0.053	5
O75503	PF15014	CLN5	299	35177.3	5.85	35	30	4886	76695	76320	40.87	66.86	-0.331	8	1.74	O14618.1	PF00403	HMA	58	6310.15	4.54	8	3	880	125	0	41.97	97.24	-0.002	3
O75503	PF15014	CLN5	299	35177.3	5.85	35	30	4886	76695	76320	40.87	66.86	-0.331	8	1.74	O14618.1	PF00080	Sod_Cu	138	14731.3	5.06	21	12	2027	7240	6990	24.16	83.33	-0.493	4
